# Supplementary material for: Concerted gene recruitment in early plant evolution
Source: PubMed Central journal article supplement (PMC2530860; doi:10.1186/gb-2008-9-7-r109), 2008-07-08
Supplement: gb-2008-9-7-r109-S1.pdf [file gb-2008-9-7-r109-S1.pdf]

# Concerted gene recruitment in early plant evolution

Jinling Huang J. Peter Gogarten

## 1. Materials and methods

*Data sources:* Protein sequences for the red alga *Cyanidioschyzon merolae* were obtained from the *Cyanidioschyzon* Genome Project [41, 73]. EST sequences of several protists were obtained from TBestDB [74]. All other sequences were from the NCBI protein sequence database.

*Identification of ancient HGT:* Anciently acquired genes in this study include those horizontally acquired prior to the split of red algae and green plants. A list of ancient HGT candidates was first identified based on phylogenomic screening of the *Cyanidioschyzon* genome using PhyloGenie and the NCBI non-redundant protein sequence database. The vast majority of the genes on this list are predominantly identified in bacteria and archaea, and therefore are likely of prokaryotic origin. To reduce the complications arising from potential cases of IGT, we adopted an approach combining sequence comparison, phylogenetic analyses, and statistical tests. Each gene on the list was first used to search the NCBI protein sequence database. Because of the cyanobacterial origin of plastids and the  $\alpha$ -proteobacterial origin of mitochondria, genes with cyanobacterial and plastid-containing eukaryotic homologs as top hits were considered as likely plastid-derived; those with proteobacterial and other eukaryotic homologs were considered as likely mitochondrion-derived. These potentially organelle-derived genes were removed from the candidate list and the remaining genes were subject to detailed phylogenetic analyses (see below). Gene tree topologies generated through detailed phylogenetic analyses were subject to careful inspections; any genes that formed a monophyly with cyanobacterial homologs or with proteobacterial and other eukaryotic sequences were also eliminated from further consideration. Additionally, alternative topologies representing various evolutionary scenarios for each gene were statistically evaluated based on AU tests [43] (see below); genes for which a straightforward IGT scenario (versus IGT followed by secondary transfers) could not be rejected ( $p$ -value  $> 0.05$ ) were also removed from the HGT candidate list.

*Detailed phylogenetic analyses:* Sequences were sampled from representative groups (including major phyla of bacteria and major groups of eukaryotes) within each domain of life (bacteria, archaea, and eukaryotes). Because of the potential for sequence contaminations, eukaryotic EST sequences whose authenticity is suspicious (e.g., high nucleotide sequence percent identity with bacterial homologs and/or absence of homologs in genomes of closely related taxa) were not included in the analyses. Multiple protein sequence alignments were performed using MUSCLE [77] and clustalx [78], followed by cross-comparisons and manual refinement. Only unambiguously aligned sequence portions were used. Phylogenetic analyses were performed with a maximum likelihood method using PHYML [79], a Bayesian inference method using MrBayes [80], and a distance method using the program *neighbor* of PHYLIP version 3.65 [81] with maximum likelihood distances calculated using TREE-PUZZLE [82]. All maximum likelihood calculations were based on a substitution matrix determined using ProtTest [83] and a mixed model of 4 gamma-distributed rate classes plus invariable sites.

Maximum likelihood distances for bootstrap analyses were calculated using TREE-PUZZLE and PUZZLEBOOT v1.03 (by Michael E. Holder and Andrew J. Roger, available on the web [84]). Branch lengths and topologies of the trees depicted in all figures were calculated with PHYML. For the convenience of presentation, gene trees were rooted using archaeal (or archaeal + eukaryotic) sequences, or paralogous gene copies if ancient gene families were involved, as outgroups; otherwise, trees were rooted in a way that no top hits of the sequence similarity search were used as an outgroup. Nevertheless, all gene trees should be strictly interpreted as unrooted.

*AU tests on alternative tree topologies:* Following detailed phylogenetic analyses, alternative tree topologies for each remaining HGT candidates were assessed for their statistical confidence using Treefinder [85]. In most cases, multiple constraint trees were generated using Treefinder for each HGT candidate by enforcing **a**) monophyly of all eukaryotic sequences, **b**) monophyly of cyanobacterial, plant and other plastid-containing eukaryotic sequences, and **c**) monophyly of cyanobacterial, plant, and closely related bacterial sequences. These alternative topologies assumed that the subject gene in plants are not HGT-derived; they served as null hypotheses that all eukaryotic sequences have the same eukaryotic or mitochondrial origin or that plants acquired the subject gene from plastids, sometimes followed by secondary HGT to other bacterial groups. AU tests, which have been recommended for general tree tests, were performed on alternative tree topologies (non-HGT hypotheses) and the tree generated from detailed phylogenetic analyses (HGT hypothesis). In this study, topologies with a p-value < 0.05 were rejected.

*Prediction of protein localization:* Targeting signal of identified protein sequences was predicted using ChloroP [86] and TargetP [87]. Additional information about protein localization in green plants was obtained from The *Arabidopsis* Information Resource (TAIR).

**2. Protein sequence alignment used for phylogenetic analyses and resulting phylogenetic trees.** Each sequence name includes a GI number from GenBank (or ID number from other databases) followed by species name. Numbers above the branches of the gene tree show bootstrap support values for maximum-likelihood analyses and distance analyses, and posterior probability from Bayesian analyses, respectively. Asterisks indicate support values below 50%. N denotes genes whose homologs are rarely found in cyanobacteria and that likely possessed novel functions; E denotes genes for which plastid-derived homologs already exist in plants; D denotes genes for which a possible replacement of an endogenous homolog cannot be excluded.

---

---

## 1. GCN5-related N-acetyltransferase (E)

CLUSTAL X (1.83.1) multiple sequence alignment

```
32444545_Rhodospirellula_baltic      KADTLIEAMGWIRRFGRKTTVIKLGGSLLEDREALQHLLLDVIFMETVGL
21541979_Mycobacterium_leprae       KAEVLAEALPWLKQLHGKVVVVKYSGNAMTDDMLRRAFAADMAFLRNCGI
48834901_Thermobifida_fusca         KAKTLIEALPWLKQLHGKVVVVKYSGNAMTDDMLRRAFAENIVFLRYAGL
7106696_Streptomyces_coelic        KAQILIEALPWLTRHHGKTVVIKFGGNAMIDEDLKAAFAQDVVFLRHAGL
30409279_Cyanidioschyzon_merol     RVQVLTEALPYIQKWRNEIMVIKYGGAVVKQD---ADIIKDLFLTCCGF
```

21673937\_Chlorobium\_tepidu  
11498879\_Archaeoglobus\_fulgid  
48841339\_Methanosarcina\_barker  
45655673\_Leptospira\_interr  
33237476\_Prochlorococcus\_marin  
6706427\_Arabidopsis\_thalia  
50911447\_Oryza\_sativa  
50927665\_Oryza\_sativa  
35214504\_Gloeobacter\_viola  
67920085\_Crocospaera\_watsonii  
48764058\_Rhodospirillum\_rubrum  
28867322\_Pseudomonas\_syring  
23102640\_Azotobacter\_vinela  
46311045\_Burkholderia\_cepaci  
17427041\_Ralstonia\_solana  
52007208\_Thiobacillus\_denitr  
30249008\_Nitrosomonas\_europa  
53759351\_Methylobacillus\_flage  
15607035\_Aquifex\_aeolic  
39995261\_Geobacter\_sulfur  
50875328\_Desulfotalea\_psychr  
CM204\_Cyanidioschyzon\_merolae  
42573209\_Arabidopsis\_thalia  
18420097\_Arabidopsis\_thalia  
CDO00012939\_Cyanophora\_paradox  
28867555\_Pseudomonas\_syring  
23103255\_Azotobacter\_vinela  
27361298\_Vibrio\_vulnif  
26249247\_Escherichia\_coli  
46312172\_Burkholderia\_cepaci  
17428264\_Ralstonia\_solana  
30248782\_Nitrosomonas\_europa  
53759353\_Methylobacillus\_flage  
52007496\_Thiobacillus\_denitr

32444545\_Rhodopirellula\_baltic  
21541979\_Mycobacterium\_leprae  
48834901\_Thermobifida\_fusca  
7106696\_Streptomyces\_coelic  
30409279\_Cyanidioschyzon\_merol  
21673937\_Chlorobium\_tepidu  
11498879\_Archaeoglobus\_fulgid  
48841339\_Methanosarcina\_barker  
45655673\_Leptospira\_interr  
33237476\_Prochlorococcus\_marin  
6706427\_Arabidopsis\_thalia  
50911447\_Oryza\_sativa  
50927665\_Oryza\_sativa  
35214504\_Gloeobacter\_viola  
67920085\_Crocospaera\_watsonii  
48764058\_Rhodospirillum\_rubrum  
28867322\_Pseudomonas\_syring  
23102640\_Azotobacter\_vinela  
46311045\_Burkholderia\_cepaci  
17427041\_Ralstonia\_solana  
52007208\_Thiobacillus\_denitr  
30249008\_Nitrosomonas\_europa  
53759351\_Methylobacillus\_flage  
15607035\_Aquifex\_aeolic  
39995261\_Geobacter\_sulfur  
50875328\_Desulfotalea\_psychr  
CM204\_Cyanidioschyzon\_merolae  
42573209\_Arabidopsis\_thalia  
18420097\_Arabidopsis\_thalia  
CDO00012939\_Cyanophora\_paradox  
28867555\_Pseudomonas\_syring  
23103255\_Azotobacter\_vinela  
27361298\_Vibrio\_vulnif  
26249247\_Escherichia\_coli  
46312172\_Burkholderia\_cepaci  
17428264\_Ralstonia\_solana  
30248782\_Nitrosomonas\_europa

---MLVEALPYIRKFEKTFVIKYGGAAMKDEVLKNIFAENVTLRLKVGI  
NVELLIEALPYIKDFHSTTMVIKIGGHAMVNDRILEDTIKDIVLLYFVGI  
RENVLLIEALPYMQEFYDSIMVIKVGGNAMVSAQIMEDIKDIVLLRYVGI  
RVNYILEALPYITQYSGKTVVIKYGGAAMAKADLKESFAKDIVLLKYVGI  
RVSVLSEALPYIQKFAGRRVVIKYGGSAMSKESLKEAVFRDIALLSVGA  
RVEILSESLPFIQKFRGKTIVVYKYGGAAMTSPELKSSVSDLVLLACVGL  
RVDVLSALPFIQRFKGTIVVYKYGGAAMKSPELQASVIRDLVLLSCVGL  
RVDVLSALPFIQRFKGTIVVYKYGGAAMKSPELQASVIRDLVLLSCVGL  
RVQVLAELALPYIQRFAGKTIVVYKYGGAAMVKNLRLDVIIRDVFLATVGI  
RVRVLSALPFIQRFAGRTFVIKYGGAAMKDSLSLKDVKVIRDIIFLACVGV  
KAKTLSALPYMRRFAGLTIVIKYGGHAMGDEPELAKTFARDVLLKQVGM  
VAKVLSALPFIIRRFVGTTLVIKYGGNAMESEELKTGFARDIVLMKAVGI  
VAQVLSALPFIIRRFVGTTLVIKYGGNAMESEELKTGFARDIVLMKAVGI  
KAEILAEALPYIRRYHGKTVVIKYGGNAMEERLKGAFARDVILLKLVGI  
KAEILAEALPYIRKPHGKTIVIKYGGNAMEEKLKHGFARDVILLKLVGM  
KAYILSEALPYIQRFYDKTIVIKYGGNAMEERLMEAFKDVLLKLVGM  
KVNILAEALPYIRRFHDKTIVIKYGGNAMEEALKQGFARDVLLKLVGM  
KAQTLAEALPYIKRFYDKTIVIKYGGNAMEPDLKCFASDVLLKLVGM  
-----MIKYGGSAMHDEELRESFARDVLLKYVGI  
KANTLMEALPFIIRRFVGTTLVIKYGGHAMADEALKESFALDVIMLKSGLI  
RAKVLIESLPYMQEFRHKTIVIKYGGHAMVDEALKKQFALDVILLKQIGI  
FVAFLRNCSPYIYHRNKTFFVIHPIGQMLLDRALFESFMQVALIKSLGV  
FVRWFREAWPYLWAHRGCTFVVIISGEIIAGSSC-DAILKDI AFLHHLGI  
FVRWFREAWPYLWAHRGCTFVVIISGEIIAGSSC-DAILKDI AFLHHLGI  
-----  
YVNWLRHASPYNIAHRDCTFVVMPLPGDVAHPNF-GNIVHDLVLLHSLGV  
YVNWLRHASPYNIAHRDCTFVVMPLPGEIEHPNF-GNIVHDLVLLHSLGV  
LVKGFQSTPYVNAHRGKTIVILLGGEAIAADKNF-SNIINDIALMHSLGV  
LVGGRHSPYINTHRGKTIVIMLGGEAIEHENF-SSIVNDIGLLHSLGI  
FVDWMSVAPYIHKFRNSTFVVGFGGVEVQQGLL-NALVSDIALLQAMGI  
FVDWLRVAPYIHAFRDKTFFVIFGFGELVKAGML-GALVNDIALLHAMGM  
FVTWFRSVTPHIIASHGKVFVIFAFGGEVVENGKF-VELVQDFNLLASLGI  
FVHWRFSAPYIHAFGGRTFVIFAFGGEVVDDGQF-VALSHDLNLLASLDV  
FVHWRFSAPYIHAFGGRTFVIFAFGGEVVAEGGF-VQLAHDVNNLNSLGV

RPVVVHGGGKAITAMAKAGIEAQFIRGRVTDKESLEVEVQLAGELNV  
HPVVVHGGGPQITAMLRRLGIADDFKGGFRVTTPEVLVDVARMVLFQVGR  
RPVVVHGGGPQINAHLERLGVSTFTAGLRVTTPEVMEIVRMVLVGQVNR  
KPVVVHGGGPQISAAALDKHGIVSEFKAGLRVTTEDAMDVVRMVLQVQR  
QIVVVHGGGPLINEWLKQLNKSQYWEVIRVTDKVTMEIVEMVLTKGVNK  
KVVIVHGGGDAITKTSAKLGLTTFVHGKRVTDQRTVDVIMQMTLAGKVNQ  
KPVVVHGGGPEISEKMEKFLKPKFVEGLRVTDKETMEVEMVLDGKVN  
KPVIVHGGGPEITEKMGMRGKAEFFQGLRITDDEETMEIAKMLVGNINT  
HPVIVHGGGPEINRLLDNLKIPTEFVHGHRVTDNQVTMEIVEMVLTKGVNK  
QPVIHGGGPEINHWLTKLEIKSEFRDGLRITDSNTMDIVEMVLIGRVNK  
RPVILVHGGGPDINRYLKQLNIPAEFRDGLRVTDATVMEIVSMVLVGVNK  
RPVIVHGGGPEINSWLGRVGEVPEQFRNGLRVTDALTMVEVEMVLVGVNK  
HPVIVHGGGPEINSWLGRVGEVPEQFRNGLRVTDALTMVEVEMVLVGVNK  
KPVVVHGGGPEINSWLERLNPVQFVGGRLVTDKITMEVEMVLAGKVNK  
HPVVVHGGGPEINSWLGLGIEPQFKDGLRVTDAAVMDVEMVVLVGRVNK  
NPVVVHGGGPQIGRMLDTRLIQSTFIDGLRVTDAAVMDVEMVLAGSINK  
NPVVVHGGGPQIGDLLKRLSIESHFIDGMRVTDAAVMDVEMVLAGGQVNK  
HPVVVHGGGPQIGDLLKRLSIESRFVDMRVTDAAVMDVEMVLAGGQVNK  
NPVIVHGGGPQIDHALKIKGAGTFIQGMRVTDDEETMEVVEVVLGGEVQQ  
NPVVVHGGGPQIDDALKKGKGTGTFIQGMRVTDDEETMEVVEVVLGGEVQQ  
NPVVVHGGGPQIAGLLQRIGKQSEFIQGMRVTDDEETLDDVEMVLAGGLVNQ  
NPVIVHGGGPQIDHMLKRVGKGVFIQGMRVTDAAVMDVEMVLAGGLINK  
NPVVVHGGGPQINELLDKLGKGEFIQGMRVTDDEETMDIVEMVLAGGQVNK  
NPVIVHGGGPQISKTLEKFGIKPKFVGGMRKTDEETMHVEMVLSGDINK  
NPVVVHGGGPQINETLKRYGIVSEFVKGMRVTDAAVMDVEMVLAGQVNK  
NPVIVHGGGPQINLDRDLKIPSYVQGMRVTDGETMDVEMVLAGKVNK  
RVILVHGCRPQVDRALERYGIQRFVGRTRISSPEVMQAVLEA-SGYVRF  
RFVLVPGTQEIQDQLLAERGREATYVGRYRVTDAAVMDVEMVLAGQVNK  
RFVLVPGTQEIQDQLLAERGREATYVGRYRVTDAAVMDVEMVLAGQVNK  
-----  
RLVHVSRRPQIESRLAQRGITPRYHRDMRITDTETLECVIDA-VGQLRI  
RLVHVSRRPQIEARLAARGLTPRFHQNLRTDVPPTLECVIDA-VGSLRL  
KVVLVYGARPQINQLLDKQSSQTPYHKHIRVTDENSLSIVMQA-AGQLQL  
RLVVVYGARPQIDANLAAHHEPLYHKNIRVTDAKTLELVKQA-AGTLQL  
QIVLVHVSRRPQVEEQSLHGVSEFSGHLRITDARALESAKEA-AGEVRL  
HIVLVHVSRRPQVEEQSLRHVQTFQFVVDGIRVTDNAALESKEA-SGELRL  
QLVHVSRRPQIESRLANQQEMSIVYQGMRVTDAAVMDVEMVLAGQVNK

53759353\_Methylobacillus\_flage  
52007496\_Thiobacillus\_denitr

RLVLVHGARPQIERLLRAKLQTKLVNGLRVTDDEAMEAVKEA-NGAVRV  
RLVLVHGVRPQVEARLTENGTDIRYVSVGLRVTDAAALACVKEA-AGTVRV

32444545\_Rhodopirellula\_baltic  
21541979\_Mycobacterium\_leprae  
48834901\_Thermobifida\_fusca  
7106696\_Streptomyces\_coelic  
30409279\_Cyanidioschyzon\_merol  
21673937\_Chlorobium\_tepidu  
11498879\_Archaeoglobus\_fulgid  
48841339\_Methanosarcina\_barker  
45655673\_Leptospira\_interr  
33237476\_Prochlorococcus\_marin  
6706427\_Arabidopsis\_thalia  
50911447\_Oryza\_sativa  
50927665\_Oryza\_sativa  
35214504\_Gloeobacter\_viola  
67920085\_Crocospaera\_watsonii  
48764058\_Rhodospirillum\_rubrum  
28867322\_Pseudomonas\_syring  
23102640\_Azotobacter\_vinela  
46311045\_Burkholderia\_cepaci  
17427041\_Ralstonia\_solana  
52007208\_Thiobacillus\_denitr  
30249008\_Nitrosomonas\_europa  
53759351\_Methylobacillus\_flage  
15607035\_Aquifex\_aeolic  
39995261\_Geobacter\_sulfur  
50875328\_Desulfotalea\_psychr  
CM204\_Cyanidioschyzon\_merolae  
42573209\_Arabidopsis\_thalia  
18420097\_Arabidopsis\_thalia  
CD000012939\_Cyanophora\_paradox  
28867555\_Pseudomonas\_syring  
23103255\_Azotobacter\_vinela  
27361298\_Vibrio\_vulnif  
26249247\_Escherichia\_coli  
46312172\_Burkholderia\_cepaci  
17428264\_Ralstonia\_solana  
30248782\_Nitrosomonas\_europa  
53759353\_Methylobacillus\_flage  
52007496\_Thiobacillus\_denitr

ELTEMMERAVNLSPR'TTCVLKGGKDDLGFVGEVTEVDRDVIESLAYTDQV  
ELVNLINAVGITGEDAQLFTAGRTDIGLVGDVDQVNIAAVLDLISAHRI  
EIVGLINFVAGMSGEDAHLFTAERVDIGLVGEVVDVQPGAVRSLDDGRI  
ELVGLLNLAVALGTGEDAHTLTATKVDIGRVGEITEIDTGAIEALLADGRI  
QLVGSINKAIGLCGKGDANLIVAKAKELGLVGEIEQIHPQVIDMLLEKHYI  
DIVQLINNAVGVSGLDADTILAKPSTLGLVGEVAEINTRYIDLLCDAGLI  
KIVTTFIKAVGLSGKDGLLIVARKIDLGFVGETEFVNPEIIRILLDNGFI  
KIVSLIGKIGLTYDGRMILGHKVDIGWVGECEVINPDILHIVLENGYI  
QIVSLINKAVGISGKDGNLAKATKFDVGLVKGIESVNPEILHNLQKAGFI  
QIVNGINSVAVGLCGIDGKLEIARPGSYGLVGEVARVNADVIPLIANGYI  
NLVSLINAVGLSGHDGRLLTARPAQLGFVGEVARVDPVSLRPLVDYGYI  
QLVSLISTAVGLCGKGDARLLTARPAALGFVGEVTRVNPVSLHPPIESGHI  
HLVSLINTAVGLCGKGDARLLTARPAALGFVGEVSRVDPVSLHPPIASGHI  
SIVQMINSAVGLCGRDGSIIEARPPDIGFVGD IQSVNPKLIQSLLEKGGHI  
ELVSLIN-GVGLCGKDGNLVKKARREDIGFVGEVSKVDVKIVDALVNNNYI  
AIVTEINCAVGLSGKDGRLIQARKLIDLGFVGEVVDVPHVLQFRDSDII  
DIVNLINSAIGLTGKDAELIRAKKIDIGQVGEVVGNTGLLNLMLVKGDFI  
DIVNLINSAIGLTGKDAELIRAKKIDIGQVGEVESVNTLELMLVQGDFI  
DIVMLINHAVGLTGKDGGLIHARKIDIGQVGEVEAINPAVVKALQDDAFI  
DIVMLINQAVGLTGKDGGLIRAKKIDIGFVGD IETINPAVVRALQDDAFI  
DIVTLINRAVGLTGKDGNIHAKKIDIGQVGEITGIDPEIIQVLDARDFI  
EIVNLINQAVGLTGKDGMIIRAKRINIGQVGEIEYIDPSLIALLDTRDFI  
EIVNLINKAVGLTGQDGNFIHARKIDIGQVGEISGIDPSLIQFLDSGDFI  
DIVALINAVGLSGRDGRLKAKKEDIGFVGEIVDVNEELIFTLSSHNF I  
EIVGYNRAVGLSGKDGNLKCRKVDIGFVGDVVKVQELIQTLHGKFI  
EIVGLINKAVGLSGRDGDLVCAEQIDVGRVGVQTKINSHVLETLSDQDFI  
SIESALQNSVSLRVVSGNFFTAQPVDFGYTGKVRKIDVQKIMKRLDEDEI  
MLEAKLSHDIGVRVDTGNFFAAKRVDFGATGEVKKIDVDRICERLDGGSV  
MLEAKLSHDIGVRVDTGNFFAAKRVDFGATGEVKKIDVDRICERLDGGSV  
-----  
SIEARLSQGSRLRVTSGNVVTARP IDYQHTGEVRRVDRKGINRLLDERHI  
AIEARLSQGARL RVVGGNFVVTARP IDYLHTGEVRRIDRKGIRGLDERAI  
AITASLSAGTHLNVVSGNFVIAQPVVYCHSGRIRRIDTEAINRSLDQCSI  
DITARLSQGAHINNVVSGNFIIAQPVVYCHSGRIRRIDEDAHRQLDSGAI  
DIEAAISAHAHISVVSGNFVVTARPVDFAHGTGIVRKKIDAESIRHSLSRKLL  
DIEATFSAGARISVVSGNFVVTARPVDFQHTGLVRKIDAESIQHSLSNRKI  
EIEALLSANAARVASGNFVVTARPVLDQYTGVEVRRINITAILDQLEQGTV  
EIESLLSAGADIRVASGNFVVTAKPIDLQHTGEVRRKIDAIIGIQKRLDDGEL  
EIEALLSAGADIRVASGNFVVTAPVDLLHTGEVRRKIDAAAIRRRLDQHDI

32444545\_Rhodopirellula\_baltic  
21541979\_Mycobacterium\_leprae  
48834901\_Thermobifida\_fusca  
7106696\_Streptomyces\_coelic  
30409279\_Cyanidioschyzon\_merol  
21673937\_Chlorobium\_tepidu  
11498879\_Archaeoglobus\_fulgid  
48841339\_Methanosarcina\_barker  
45655673\_Leptospira\_interr  
33237476\_Prochlorococcus\_marin  
6706427\_Arabidopsis\_thalia  
50911447\_Oryza\_sativa  
50927665\_Oryza\_sativa  
35214504\_Gloeobacter\_viola  
67920085\_Crocospaera\_watsonii  
48764058\_Rhodospirillum\_rubrum  
28867322\_Pseudomonas\_syring  
23102640\_Azotobacter\_vinela  
46311045\_Burkholderia\_cepaci  
17427041\_Ralstonia\_solana  
52007208\_Thiobacillus\_denitr  
30249008\_Nitrosomonas\_europa  
53759351\_Methylobacillus\_flage  
15607035\_Aquifex\_aeolic  
39995261\_Geobacter\_sulfur  
50875328\_Desulfotalea\_psychr  
CM204\_Cyanidioschyzon\_merolae  
42573209\_Arabidopsis\_thalia

AVIPSLCTDDKQQLYVNVNADTAAAMAVASLQADKLVFLSDVNGVRRDPEI  
PVVSTLAPDRDGVVHINADTAAAAALETGLAEKLLMLTNVEGLYTRWPL  
PIISSIARSAEQGVYVNVNADTAAAAALAVALGAAKLIVLTDVEGLYADYPL  
PVVSSIARSQDDHVYVNVNADTAAAAALAAALGAETLMVLTDEGLYDVPV  
PVIASVAASHDGTTYNLNADVVAGELAIKLLKAKKLIPLTDTKGILADINV  
PVIAPIGYDMENIYINADTAAAAATAVALKAEKLIYVSDVEGVRVGNRI  
PVVSPVATDLAAGNTYLNADVVAGDIAAALKAKKLIPLTDVPGILENPDIL  
PVISPIAVDAKGNALNINADIVAGDIAAALHAKKLIPLTDVSGLLRDMNH  
PVISPVASENSEGESLNIADTFAGEIAAGALKAEKLIPLTDQGIILIDNQL  
PVISSVASSVEGINYNINADTVAGEIAAAIGAEKLIPLTDTSGLKNKSL  
PVIASVAADDSGQAYNINADTVAGELAAALGAEKLIPLTDVAGILENKEK  
PVIATVAADETGQAYNINADTAAAGEIAAALGAEKLIPLTDVSGILADRNL  
PVIATVAADETGQAYNINADTAAAGEIAAALGAEKLIPLTDVSGILADRNL  
PVLSSVASENDEGQAYNINADTAAAGELAAALDAEKLIPLTDTPGILLDKKL  
PVISSVAADETGQAHNINADTVAGEIAAALGAEKLIPLTDTAGILENYQL  
PVIAPIGIGEAGETFINADTAAAGALAAQMKAAARLLMLTDVKGVLDDKDL  
PVIAPIGVGPDESININADLVAGKVAEALKAEKLIPLTNIAGLMNKQGV  
PVIAPIGVGDGESYNINADLVAGKVAEALKAEKLIPLTNIAGLMNKQGV  
PVISPIGVGADGSLYNINADLVAGKLAATLVNLAEKLLMNTNIPGVMDDGL  
PVISPIGVSDDGQAYNINADVVAGKMAEILKAEKLVMMNTNIPGVMDDKGL  
PVVAPLGTDAEGNAYINADVAAGKTAGVLAQAEKVIPTNTPTGVLDDKDL  
PVIAPIGVGEDGESYNINADLVAGRLAETLKAEKLIPLTNTPTGVLDDKGL  
PVIAPIGVGDIDQTYNINADVVAGKLAELVLAEKLIPLTNTPTGVLDDKGL  
PVIAPVGVGEEGAYVNVNADLAAEIAAGEIKAEKLIYPLTDTKGVLDKGL  
PVIAPVGVGEEQGESYNVNVNADLVAGRVAGALRAEKLIPLTDVAGVKDKAGL  
PIIAPVGVGEDGRAFNINADLVASAIAAELSAEKLIPLTDVPGVKNKAGL  
VILSNVGFAPSGALFNCQSEEVASSCASQLQADKLIPTMDGEMLADLRTI  
VLLRNLGHSSSEVLNNTYEVATACALAIAGDKLICIMDGP-ILDESGL

18420097\_Arabidopsis\_thalia  
CD000012939\_Cyanophora\_paradox  
28867555\_Pseudomonas\_syring  
23103255\_Azotobacter\_vinela  
27361298\_Vibrio\_vulnif  
26249247\_Escherichia\_coli  
46312172\_Burkholderia\_cepaci  
17428264\_Ralstonia\_solana  
30248782\_Nitrosomonas\_europa  
53759353\_Methylobacillus\_flage  
52007496\_Thiobacillus\_denitr

VLLRNLGHSSSEVLNNTYEVATACALAI GADKLCIMDGP-ILDESGL  
-----ARG-----  
VLLSPLGYSPTGEIFNLACEDVATRAAIDL AADKLLLF GAETGLLDDEQGL  
VLLSPLGYSPTGEIFNLACEDVATRAAIDL KADKLLLF GAEPGLLDGQGL  
VLLGPIASSVTGECFNLLSEEVATQVAIKL KADKLI GFCSEQGVIDEEGA  
VLMGPVAVSVTGESFNLTSEEIATQLAIK LKAEKMIGFCSSQGVTTDDGI  
VLLSPLGFSPTGEAFNLSMEDVASAAAIALR ADKIVFLTEGPGIVDDEGL  
VLLSPLGFSPTGQAFNLSMEDVATNTATA LKADKLIFITEVPGIMDRVGL  
VLLSPLGYSPTGEIFNLTLENIAEEVAAAL QADKLIFLVDTPGIRQOTEL  
VLLSPLGYSPTGEVFNLTLEDVATSTAIALD ADKLIFLMDSSGVHNIRGL  
VLLSPIGYSPTGEIFNLSLEDVATQAAVELA ADKLIFLMNTEGVPKGRI

32444545\_Rhodopirellula\_baltic  
21541979\_Mycobacterium\_leprae  
48834901\_Thermobifida\_fusca  
7106696\_Streptomyces\_coelic  
30409279\_Cyanidioschyzon\_merol  
21673937\_Chlorobium\_tepidu  
11498879\_Archaeoglobus\_fulgid  
48841339\_Methanosarcina\_barker  
45655673\_Leptospira\_interr  
33237476\_Prochlorococcus\_marin  
6706427\_Arabidopsis\_thalia  
50911447\_Oryza\_sativa  
50927665\_Oryza\_sativa  
35214504\_Gloeobacter\_viola  
67920085\_Crocospaera\_watsonii  
48764058\_Rhodospirillum\_rubrum  
28867322\_Pseudomonas\_syring  
23102640\_Azotobacter\_vinela  
46311045\_Burkholderia\_cepaci  
17427041\_Ralstonia\_solana  
52007208\_Thiobacillus\_denitr  
30249008\_Nitrosomonas\_europa  
53759351\_Methylobacillus\_flage  
15607035\_Aquifex\_aeolic  
39995261\_Geobacter\_sulfur  
50875328\_Desulfotalea\_psychr  
CM204\_Cyanidioschyzon\_merolae  
42573209\_Arabidopsis\_thalia  
18420097\_Arabidopsis\_thalia  
CD000012939\_Cyanophora\_paradox  
28867555\_Pseudomonas\_syring  
23103255\_Azotobacter\_vinela  
27361298\_Vibrio\_vulnif  
26249247\_Escherichia\_coli  
46312172\_Burkholderia\_cepaci  
17428264\_Ralstonia\_solana  
30248782\_Nitrosomonas\_europa  
53759353\_Methylobacillus\_flage  
52007496\_Thiobacillus\_denitr

IPALSAFEARQLIAGMIPKVEACLETLGRGVQKVHI DGRLRHSLLLEIF  
VNEIDSAAALQQLPGMIPKVEACLRVAVTGGVPSAHVIDGRVKHCVLVVELL  
ISHMTASELEEMLPGMVPMKMEACLRVAVRGGVPOAHVLDGRIPNAMLLEIF  
ISRLTASELEKLLPGMVPKMEGCLHAVRGGVTARVIDGRVQHSILLEIF  
ISTLNLKAEKNLANGMIPKVNACICAVENGVEAAHIIGGKEKHQLLELL  
LKTICKADAAELIEGMIPKVVSAYQTLDDGGVGVHLLDQITHSLLLEVF  
ISRIRLSELENMRSGMIPKVDAAVIKALKSGVERAHIIDGSRPHSILLEIF  
ISRVTLEDIDHLIAGMIPKLGAAVAVKNGVEKAHIINGSVSHSMLELF  
VTGLNRNKVKDYIRGMIPKVECCLTADQGVRRTHIIDGRVSHSILLEIF  
IQNIRLSDMRELIDGMPKAECCIRALAQGVNAAHIIDGRIPHALLLEVF  
IKEIDIKGVKMIIEGMIPKVKCCIRSLAQGVKTASIIDGRRQHSLLHEIM  
VKEIDIAGVRQMVAGMIPKVECCVRALAQGVHTASIIDGRVPHSLLLEIL  
VKEIDIAGVRQMVAGMIPKVECCVRALAQGVHTASIIDGRVPHSLLLEIL  
IRKLDIYQARKLIAGMIPKVQCCVRALAQGVRAAHIVDGRQMHALLLEVL  
LTKLDIKQARDLIAGMIPKVNCCVRSALAQGVRAAHIIDGRIPHSILLEIF  
IQELSDRARLLKQGMIPKVETCIDAVERGVEAAVIVDGRVPHAVLLEIF  
LTGLTTEQVDGLIAGMLPKIRCALEAVQGGVNSSHIIDGRVPHAVLLEIF  
LTGLSTEQVDAL IAGMLPKIRCALDAVQGGVTSAHIIDGRVPHAVLLEIF  
LTDLSAREIDALFEGMLPKISSALDAKSGVKS VHIIDGRIEHSVLEIL  
LTDLSAREIDELFAGMLPKISSALDAKSGVNSVHIIDGRIEHSVLEIL  
LTGLTPREISDLIAGMIPKVGAYDAVNSGVKTAHIIDGRVPHAVLLEVL  
LTGLTAGRVDEL IAGMLPKIKSALDAVKNVKSCHIIDGRVPHAVLLEIL  
LTGLTPKQIDDLVAGMLPKISSALDAARS GVKSVHIIDGRVEHALLLEVL  
ISSLSKDKAEELIKGMIPKVRSALEKGVK VHIIDGRVPHAVLLEIF  
LSSIRLDTVPLIDGMIPKVTCVDAIEEGVRKASIIDGRVPHAVLLEIF  
LTTLEWQELNGLIEGMIPKVRCCEDAVKGGVAKTYIVDGRVPHAVLLEIF  
MHNVPRAAMEFLQRFHVCLQESVRAALRGVTRAHLINMFVDGAILIELY  
IHFLTLEQADMLVRGYLSELAAAAFVCRGGV KRVHLLDGTISGVLLLELF  
IHFLTLEQADMLVRGYLSELAAAAFVCRGGV KRVHLLDGTISGVLLLELF  
-----RDVRRLLHLVGRTOQD GALLVELF  
VRELRPQQVPAHLQ--AELLDAAAEACRGGV ARSHIVSYAEDGALLTELF  
IRELRPQQVAHLEEL---LDAAAQACRAGV PRSHMVSYAEDGALLTELF  
VAELFPDAEKFIQGTLRFLKGAVAACRAGV PRSHLISYKIDGALIQELF  
VSELPNEAQAARVEGTVRFLRGAVKACRS GVRCHLISYQEDGALLQELF  
IREMSLDAAEELDDDAFFLKHSIRACRGGV TRAHLIPQSLDGSMLLELF  
QQELSMESAIEERLDRDYLLQHVKAMRGGV RRAHLIPFALDGSILLELF  
LPELTVRQKGTLLADTRLYLPWALHACEKGV KRVHLLVSRHIDGALLLELF  
LREMTTDPKARNLLRDELYLPAAVRACGQGVARTHLISRHDGAILQELF  
HNALTVNEARQVLDVTTYLPCAVTACTQGV KRAHLISRHRD GALLSELF

\* :: :: \*

32444545\_Rhodopirellula\_baltic  
21541979\_Mycobacterium\_leprae  
48834901\_Thermobifida\_fusca  
7106696\_Streptomyces\_coelic  
30409279\_Cyanidioschyzon\_merol  
21673937\_Chlorobium\_tepidu  
11498879\_Archaeoglobus\_fulgid  
48841339\_Methanosarcina\_barker  
45655673\_Leptospira\_interr  
33237476\_Prochlorococcus\_marin  
6706427\_Arabidopsis\_thalia  
50911447\_Oryza\_sativa  
50927665\_Oryza\_sativa  
35214504\_Gloeobacter\_viola  
67920085\_Crocospaera\_watsonii  
48764058\_Rhodospirillum\_rubrum  
28867322\_Pseudomonas\_syring  
23102640\_Azotobacter\_vinela  
46311045\_Burkholderia\_cepaci

TTDGVGTEIH  
TNEGVTGKVV  
TDEGVGTMVL  
TDEGIGTMVV  
TEKGRGSMIV  
TNEGVTQFV  
TKEGIGTMVE  
TDRGIGTMVY  
TDQIGISLIE  
TDKGIGTMIV  
SDEGAGTMIT  
TDEGTGTMIT  
TDEGTGTMIT  
TDQIGISMLV  
TDRGIGSMIV  
TPRGAGTLIR  
TDSGVGTQIT  
TDTGVGTLIT  
TEQPFGTMR

|                                |             |
|--------------------------------|-------------|
| 17427041_Ralstonia_solana      | TEQAFGMIR   |
| 52007208_Thiobacillus_denitr   | TPEGVGTLIK  |
| 30249008_Nitrosomonas_europa   | TDEGVGTLIK  |
| 53759351_Methylobacillus_flage | TDAGVGTLIT  |
| 15607035_Aquifex_aeolic        | TKEGVGTIEIT |
| 39995261_Geobacter_sulfur      | TDVGVGTIEH  |
| 50875328_Desulfotalea_psychr   | TRDGVGTIEY  |
| CM204_Cyanidioschyzon_merolae  | TRDGVGLMIS  |
| 42573209_Arabidopsis_thalia    | KRDGMGMTVA  |
| 18420097_Arabidopsis_thalia    | KRDGMGMTVA  |
| CD000012939_Cyanophora_paradox | TRNGSGLMVV  |
| 28867555_Pseudomonas_syring    | TRDGGGTLVA  |
| 23103255_Azotobacter_vinela    | TRDGGGTLVT  |
| 27361298_Vibrio_vulnif         | SFDGIGTQVV  |
| 26249247_Escherichia_coli      | SRDGIQTQIV  |
| 46312172_Burkholderia_cepaci   | LHDGVGMTIS  |
| 17428264_Ralstonia_solana      | LHDGVGMTVS  |
| 30248782_Nitrosomonas_europa   | THSGIGSMIT  |
| 53759353_Methylobacillus_flage | THDGIGTMVT  |
| 52007496_Thiobacillus_denitr   | TRDGVGTLIT  |

**Note:** All top hits of GenBank Searches (using *Cyanidioschyzon* sequence and *Arabidopsis* accession number NP\_974701 as queries) are from gamma and beta-proteobacteria. Multiple copies of this gene exist in plants and in bacteria. One of these copies in red algae and green plants forms a group with homologs from gamma and beta-proteobacteria with strong support, whereas the other copy groups with cyanobacterial sequences with modest support (the *Cyanidioschyzon* sequence in that group is encoded in the plastidic genome). In *Arabidopsis*, the protein product of the gamma and beta-proteobacteria-related gene copy is annotated as located in cytoplasm (GenBank accession number NP\_974701 and TAIR locus AT4G37670). The EST sequence of glaucophyte *Cyanophora* was obtained from tbESTdb; this sequences groups with homologs of red algae and green plants in preliminary analyses, but was removed from the detailed phylogenetic analyses because of its very short length (only 32 aa)

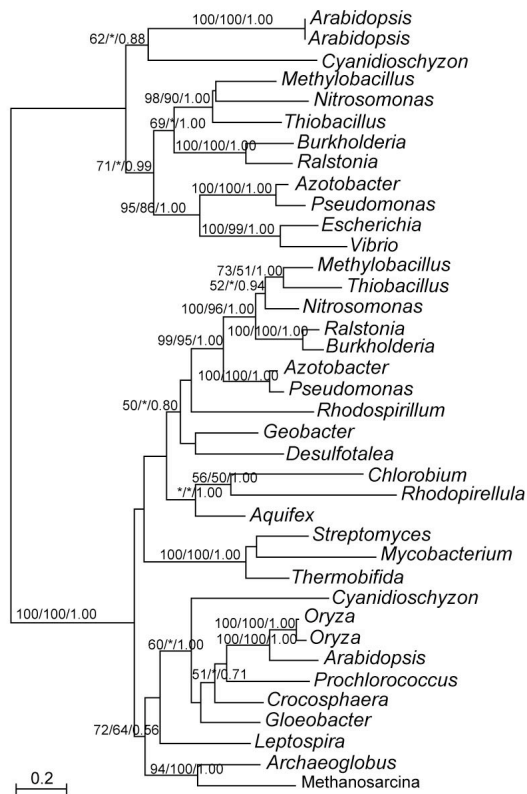

**Figure 1.** Molecular phylogeny of GCN5-related N-acetyltransferase. P-value = 0.235 from AU test on the presented tree. AU tests were also performed on alternative topologies including **(A)** monophyly of all red algal and green plant sequences, and **(B)** monophyly of cyanobacterial and all red algal, green plant sequences. These alternative topologies investigate if both copies of this gene in red algae and green plants have the same plastidic origin. P-values < 0.001 from AU tests on both alternative topologies.

## 2. Glycyl-tRNA synthetase (D)

**Note:** GlyRS in living organisms exists in forms of homodimer ( $\alpha_2$ ) and heterotetramer ( $\alpha_2\beta_2$ ); the former is distributed in eukaryotes, archaea, and many bacteria whereas the latter is only found in bacteria, red algae and green plants. Few bacteria contain both glyRS types. The  $\alpha$ - and  $\beta$ -subunits of tetrameric glyRS are usually encoded in separate genes. **In a few groups, the two subunits are encoded in a single fused gene; these include actinomycetes, chlamydiae, red algae, and green plants.** Not only are sequences from actinomycetes, red algae and green plants similar in gene structure, they also have the highest percent identity and share several conserved amino acid residues. Phylogenetic analyses of each of the subunits strongly suggest a common origin of actinomycete, red algal and plant sequences (**Figures 2A-2B**). Based on

the gene structure and molecular phylogeny, it is likely that primary photosynthetic eukaryotes acquired this gene from either actinomycetes or chlamydiae (Chlamydiae are the only bacterial group aside from actinomycetes and plants that possess a fused gene in our database searches). The second scenario requires an independent HGT event from photosynthetic eukaryotes or chlamydiae to actinomycetes. The *Arabidopsis* sequence (GenBank accession number NP\_190394, TAIR locus AT3G48110) is experimentally determined to be targeted to both chloroplasts and mitochondria.

## 2A. Alpha subunit

CLUSTAL X (1.83.1) multiple sequence alignment

```

67931183_Solibacter_usitat      FQEIILTLKRYWADRGCI IQEYPDTEVGAGTMCPETFRLRVLGPKPYRTAY
4980714_Thermotoga_mariti      LQDVIMKLNDFWASKGCLLEQPYDMEVGAGTFHPATFFGSLRKGPKWVAY
34484120_Wolinella_succin     FSDLLKLQTFWKEQGCLIVQPYDIPAGAGTFHPATLLRSLRDKPWSVAY
15611961_Helicobacter_pylori   FSSLLKLQEWKDGQCLVIQPYDIPAGAGTFHPATLLRSLRDKKPNVAY
50914779_Streptococcus_pyogen  FQEIILTLQQYWNDOGCLMQAYDNEKGAGTMSPTYFLRAIGPEPWNAAAY
23099404_Oceanobacillus_ihyen  IQEMILTLQNHWSEHNCILMQAYDTEKAGTMSPMTLRSLRSGPEPWNVAY
46907687_Listeria_monocy      LQTMIRTLQDYWSEQGCIMLQSYDVEKAGTMSPTYFLKAIGPEPWKAGY
51891712_Symbiobacterium_therm FQDLVLTLDKFWAEQGC IIRHPYDVEKAGTFNPETFRLALGPEPWNVAY
15606265_Aquifex_aeolic       FQDIIMTLHKFWAEKGLIWQPYDVEVGAGTMNPATFLKVLGKKPNVAY
34763703_Fusobacterium_nuclea  FQEIIFSLQYWSSKGC IIGNPYDIEKAGTFNPNTFLMSLGPPEPWNVAY
66855635_Anaeromyxobacter_deha FQDLILKLQSYWASRNCILAQGYDQEVGAGTMNPSTFLRVLGPEPWNVAY
39934120_Rhodopseudomonas_palu FQGLILTLQRFWADYGCVILQPYDMEVGAGTFHPATTLRALGPKRWNAAY
13476181_Mesorhizobium_loti    FQGLILTLHNYWAA YGCVILQPYDMEVGAGTFHPATTLRALGPKRWNAAY
23013834_Magnetospirillum_magn FQSLILTLQAFWAEQGCVILQPYDMEVGAGTFHPATTLRALGPDHWKCAAY
48766000_Rhodospirillum_rubrum FQSLILRLQQFWAAQGCVLLQPYDMEVGAGTFHPATTLRALGPEPWAAY
68213209_Methylobacillus_flage FQOIILTLQQYWDKQGCALLQPYDMEVGAGTSHATFLRALGPEPWAAY
56476158_Azoarcus_sp.         FQQVILTLQQYWGEGCVLLQPYDLEVGAGTSHATFLRAIGPEPWNAAAY
26986806_Pseudomonas_putida    FQDLILALQGYWAAQGCVLLQPYDMEVGAGTFHPATFLRALGPDHWKCAAY
1573948_Haemophilus_influe     FQGMILALQEWANQGC IIVQPFDMVEVGAGTSHPM TALRALGPEPMAFAY
46580307_Desulfovibrio_vulgar  FQNVLTLQNYWASRGCVITQPIDVECGAGTFNPSTFLRVIGPEPWNVAY
68179079_Desulfuromonas_acetox FQDLILSLQNYWAAQGCVILQPYDIEKAGTFNPATFLRSLGPEPWNVAY
39982448_Geobacter_sulfur     FQDLILALQGYWAAQGCVILQPYDTEKAGTFNPATFLRVLGPEPWNVAY
68207211_Desulfitobacterium_ha FQDMILSLNQFWGEGC IIAQPYDMEKAGTFNPNTFLRALGPEPWKVAY
72382617_Prochlorococcus_marin FQDIISLNNFWSEKGC LLLQPYDLEKAGTMSPHSFLRAIGPEPWAAY
17131075_Nostoc_sp.           FQSVIATLHQFWAERGCLIAQPYDIEKAGTKNPHFTLRLALGPEPWAAY
46135082_Anabaena_variab       FQSVIATLHQFWAERGCLIAQPYDIEKAGTKNPHFTLRLALGPEPWAAY
68230324_Frankia_alpha         MQDALLTLTRYWTERGCMIVQPFNTEVGAGTHNPATILRVLGGEPWRVAY
68172611_Frankia_sp.          MQDALLLALTRYWTDRCMIVQPFNTEVGAGTLNPATVLRVLGPEPWRVAY
28572421_Tropheryma_whipl      MQDTILLTLQTYWAHRGCLVFPMTNEVGAGTANPATLLGVLGDKTWGVAY
46399968_Parachlamydia_sp.     FQEFRLTLSTFWKQGC IHHQGYDLEVGAGTFNPATFLRSLGPEPYRAAY
C_130039_Chlamydomonas_reinh    FQEAITLQEWYASVGC AIWLPHTNEVGAGTMNPATFLRVLGPEPWNVAY
15836479_Chlamydomonas_pneumo  LQSMIATILRFWSEQGC IHHQGYDLEVGAGTFNPATFLRALGPEPYKAAAY
15605530_Chlamydia_tracho      LQTMMAAILNFWSEQGC IHHQGYDLEVGAGTFNPATFLQSLGPEPFRYAY
55296761_Oryza_sativa         FQQAIIQLQDYWASVGC AVMQCSNTEVGAGTMNPLTFLRVLGPEPWNVAY
30692978_Arabidopsis_thalia    FQQAIIQLQEWYASVGC AVMQSPNTEVGAGTMNPCTFLRVLGPEPWNVAY
CM269_Cyanidioschyzon_merolae  FQEAIIQLQIYWAERGCLLWRPYNAEVGAGTMNPATFLRALGPEPWNVAY
: . : : . * . * : : * * * * . : : : . *

```

```

67931183_Solibacter_usitat      VQPSRRPADGRYGDNPRLYKHSQ LQVILKPAPEVDI ELYLGSLEAIGID
4980714_Thermotoga_mariti      VQPSRRPTDGRYGENPNRLQRYFQYQV I IKPSPENSQELYLESL EYLGIN
34484120_Wolinella_succin     VAPSRRPDGRYGENPNRLGSY YQFQV I IKPSPDNIQELYLKSLE YLGLN
15611961_Helicobacter_pylori   VAPSRRPDGRYGENPNRLGSY YQFQV I IKPSPSNIQELYLKSLE YLGLN
50914779_Streptococcus_pyogen  VEPSRRPADGRYGENPNRLYQH HQFQVVMKPSPSNIQELYL ASLEKLGIN
23099404_Oceanobacillus_ihyen  VEPSRRPDDGRYGENPNRLYQH HQFQVIMKPSPDNIQELYL ESLEKLGIN
46907687_Listeria_monocy      VEPSRRPADGRYGENPNRLFQ HHQFQVVMKPSPDNIQELYL GSLEKLGIN
51891712_Symbiobacterium_therm I EPCRRPADGRYAQNPNRMQH YFQYQVIMKPSPENIQEIYLEMLER I GID
15606265_Aquifex_aeolic       VEPSRRPQDGRYGENPNRLQHY YQFQVILKPA PRNPQEIYLESLE RLGIN
34763703_Fusobacterium_nuclea VEPSRRPKDGRYGDNPNRVYQH HQFQVIMKPSPINIQELYL ESLEKLGID
66855635_Anaeromyxobacter_deha VEPSRRPADGRYGENPNRLYQH HQFQVILKPNPPD VQELYLGSLEAIGID
39934120_Rhodopseudomonas_palu VQPSRRPKDGRYGENPNRLQHY YQFQVILKPSPPDI QDLYLKSLEAIGVD
13476181_Mesorhizobium_loti    VQPSRRPKDGRYGENPNRLQHY YQYQVILKPNPPNLQEL YLGSLEAIGVD
23013834_Magnetospirillum_magn VQPSRRPKDGRYGENPNRLQHY YQYQVLLKPSPPNAQEL YLGSLEKLGID
48766000_Rhodospirillum_rubrum VQPSRRPTDGRYGENPNRLQHY YQFQVILKPSPADPQAL YLDSLEALGID
68213209_Methylobacillus_flage VQPSRRPKDGRYGDNPRLQHY YQFQVLLKPA PGNILELYLGSLEALGFD

```



56476158\_Azoarcus\_sp.  
26986806\_Pseudomonas\_putida  
1573948\_Haemophilus\_influe  
46580307\_Desulfovibrio\_vulgar  
68179079\_Desulfuromonas\_acetox  
39982448\_Geobacter\_sulfur  
68207211\_Desulfitobacterium\_ha  
72382617\_Prochlorococcus\_marin  
17131075\_Nostoc\_sp.  
46135082\_Anabaena\_variab  
68230324\_Frankia\_alpha  
68172611\_Frankia\_sp.  
28572421\_Tropheryma\_whipl  
46399968\_Parachlamydia\_sp.  
C\_130039\_Chlamydomonas\_reinh  
15836479\_Chlamydomonas\_pneumo  
15605530\_Chlamydia\_tracho  
55296761\_Oryza\_sativa  
30692978\_Arabidopsis\_thalia  
CM269\_Cyanidioschyzon\_merolae

VQPSRRPKDGRYGENPNRLQHYQFQVVLKPSPLNIQELYLDSLRLALGID  
VQPSRRPADGRYGENPNRLQHYQFQVVLKPNPANFQELYLGLSLKAIGLD  
VQPSRRPTDGRYGENPNRLQHYQFQVVIKPSPDNIQELYLGLSLEMLGFD  
VEPSRRPTDGRYGENPNRLQHYQFQVILKPSPDNVQELYLGLSLRALGID  
VEPSRRPTDGRYGENPNRLQHYQFQVILKPAPLNIQELYLDSLKSPFGID  
VEPSRRPTDGRYGENPNRLQHYQFQVIMKPSPMNILDLYLDSLRAFID  
IEPSRRPTDGRYGENPNRLQHYQFQVVIKPSPDNIQELYLGLSLERLGVN  
PEPCRRPTDGRYGNPNRAQHYQFQVILKPSLDGIQEIYLSLLEALGIS  
IEPCRRPTDGRYGENPNRFQHYQFQVILKPSPDNIQDIYLDLRLALGIR  
VEPCRRPTDGRYGENPNRVQHYQFQVILKPSPDNIQDIYLDLRLALGIR  
VEPSVRPDDSRYGFPNRLQHTQFQVVLKPPDPGNPQELYLGLSLQALGID  
VEPSVRPDDSRYGHNPRLQHTQFQVILKPPDPGNPQELYLGLSLAALGID  
VEPCVRPDDSRYGINPRLQCHTQFQVVLKPEPQEMYLESLAETGID  
IEPCRRPADGRYGTNPRLQHYQFQVILKPSPLNMQELYLGLSLEALGFN  
PEPSRRPDDSRYGNPNRLQRHTQFQVILKPPDPGNAQELYLGLSLEALGID  
VEPSRRPQDGRYGVHPNRLQYHQLQVILKPPVFNFLSLYTESLRAIGLD  
IEPSRRPQDGRYQHPNRLQYHQLQVILKPPVFNFLSLYTESLKVIGLN  
VEPSIRPDDSRYGNPNRLQRHTQFQVILKPPDPGNSQDLFLHSLSALGIR  
VEPSIRPDDSRYGENPNRLQRHTQFQVILKPPDPGNSQDLFLHSLSALGID  
EEPSVRPDDSRYGENPNRIQHTQFQVILKPPAPPNSQELLLGSYAALGID  
\* . \*\* \* . \*\* . : \* . \* : \* \*\* : \*\* \* . : : \* .

67931183\_Solibacter\_usitat  
4980714\_Thermotoga\_mariti  
34484120\_Wolinella\_succin  
15611961\_Helicobacter\_pylori  
50914779\_Streptococcus\_pyogen  
23099404\_Oceanobacillus\_iheyen  
46907687\_Listeria\_monocy  
51891712\_Symbiobacterium\_therm  
15606265\_Aquifex\_aeolic  
34763703\_Fusobacterium\_nuclea  
66855635\_Anaeromyxobacter\_deha  
39934120\_Rhodopseudomonas\_palu  
13476181\_Mesorhizobium\_loti  
23013834\_Magnetospirillum\_magn  
48766000\_Rhodospirillum\_rubrum  
68213209\_Methylobacillus\_flage  
56476158\_Azoarcus\_sp.  
26986806\_Pseudomonas\_putida  
1573948\_Haemophilus\_influe  
46580307\_Desulfovibrio\_vulgar  
68179079\_Desulfuromonas\_acetox  
39982448\_Geobacter\_sulfur  
68207211\_Desulfitobacterium\_ha  
72382617\_Prochlorococcus\_marin  
17131075\_Nostoc\_sp.  
46135082\_Anabaena\_variab  
68230324\_Frankia\_alpha  
68172611\_Frankia\_sp.  
28572421\_Tropheryma\_whipl  
46399968\_Parachlamydia\_sp.  
C\_130039\_Chlamydomonas\_reinh  
15836479\_Chlamydomonas\_pneumo  
15605530\_Chlamydia\_tracho  
55296761\_Oryza\_sativa  
30692978\_Arabidopsis\_thalia  
CM269\_Cyanidioschyzon\_merolae

LRKHDLKLEEDNWEAPTLGAWGIGWQVMDGLEISQFTYFQCGGIDLDL  
LKEHDIRFVEDNWEAPTLGAWGIGWQVMDGLEISQFTYFQCGGIDLDL  
LKEHDIRFVEDNWEAPTLGAWGLGWEVWLDGMEITQFTYFQCGGIDLDL  
LNEHDIRFVEDNWEAPTLGAWGLGWEVWLDGMEITQFTYFQCGGIDLDL  
PLEHDIRFVEDNWEAPTLGAWGLGWEVWLDGMEITQFTYFQCGGIDLDL  
PLEHDIRFVEDNWEAPTLGAWGLGWEVWLDGMEITQFTYFQCGGIDLDL  
PLEHDIRFVEDNWEAPTLGAWGLGWEVWLDGMEITQFTYFQCGGIDLDL  
PKKHDIRFVEDNWEAPTLGAWGLGWEVWLDGMEITQFTYFQCGGIDLDL  
PLEHDIRFVEDDWEAPTLGAWGLGWEVWLDGMEITQFTYFQCGGIDLDL  
PEKHDIRFVEDDWEAPTLGAWGLGWEVWLDGMEITQFTYFQCGGIDLDL  
PREHDIRFVEDDWEAPTLGAWGLGWEVWLDGMEITQFTYFQCGGIDLDL  
TALHDIRFVEDDWEAPTLGAWGLGWEVWLDGMEITQFTYFQCGGIDLDL  
PLLDHDIRFVEDDWEAPTLGAWGLGWEVWLDGMEITQFTYFQCGGIDLDL  
PLAHDHDIRFVEDDWEAPTLGAWGLGWEVWLDGMEITQFTYFQCGGIDLDL  
PLKHDIRFVEDDWEAPTLGAWGLGWEVWLDGMEITQFTYFQCGGIDLDL  
LQNDHDIRFVEDDWEAPTLGAWGLGWEVWLDGMEITQFTYFQCGGIDLDL  
TNAHDIRFVEDDWEAPTLGAWGLGWEVWLDGMEITQFTYFQCGGIDLDL  
PLVHDIRFVEDDWEAPTLGAWGLGWEVWLDGMEITQFTYFQCGGIDLDL  
PTKHDIRFVEDDWEAPTLGAWGLGWEVWLDGMEITQFTYFQCGGIDLDL  
PAAHDIRFVEDDWEAPTLGAWGLGWEVWLDGMEITQFTYFQCGGIDLDL  
SASHDIRFVEDDWEAPTLGAWGLGWEVWLDGMEITQFTYFQCGGIDLDL  
PAKHDIRFVEDDWEAPTLGAWGLGWEVWLDGMEITQFTYFQCGGIDLDL  
PKKHDIRFVEDDWEAPTLGAWGLGWEVWLDGMEITQFTYFQCGGIDLDL  
AKDHDIRFVEDDWEAPTLGAWGLGWEVWLDGMEITQFTYFQCGGIDLDL  
PEDHDIRFVEDDWEAPTLGAWGLGWEVWLDGMEITQFTYFQCGGIDLDL  
PEDHDIRFVEDDWEAPTLGAWGLGWEVWLDGMEITQFTYFQCGGIDLDL  
TAAHDIRFVEDDWEAPTLGAWGLGWEVWLDGMEITQFTYFQCGGIDLDL  
TAAHDIRFVEDDWEAPTLGAWGLGWEVWLDGMEITQFTYFQCGGIDLDL  
TAAHDIRFVEDDWEAPTLGAWGLGWEVWLDGMEITQFTYFQCGGIDLDL  
LKKHDIRFVEDDWEAPTLGAWGLGWEVWLDGMEITQFTYFQCGGIDLDL  
LQEHDIRFVEDDWEAPTLGAWGLGWEVWLDGMEITQFTYFQCGGIDLDL  
TKA-----GGRVLDL  
LRDHDIRFVEDDWEAPTLGAWGLGWEVWLDGMEITQFTYFQCGGIDLDL  
LVDHDIRFVEDDWEAPTLGAWGLGWEVWLDGMEITQFTYFQCGGIDLDL  
VREHDIRFVEDDWEAPTLGAWGLGWEVWLDGMEITQFTYFQCGGIDLDL  
VTAHDIRFVEDDWEAPTLGAWGLGWEVWLDGMEITQFTYFQCGGIDLDL  
IDAHDIRFVEDDWEAPTLGAWGLGWEVWLDGMEITQFTYFQCGGIDLDL

67931183\_Solibacter\_usitat  
4980714\_Thermotoga\_mariti  
34484120\_Wolinella\_succin  
15611961\_Helicobacter\_pylori  
50914779\_Streptococcus\_pyogen  
23099404\_Oceanobacillus\_iheyen  
46907687\_Listeria\_monocy  
51891712\_Symbiobacterium\_therm  
15606265\_Aquifex\_aeolic  
34763703\_Fusobacterium\_nuclea  
66855635\_Anaeromyxobacter\_deha  
39934120\_Rhodopseudomonas\_palu  
13476181\_Mesorhizobium\_loti

VPAELTYGLERLTAFLQVKDSVYDIDWTYGDVRYKDELOYSVYNFEMADI  
IPLIITYGLERLAMYLGQVDNVYEVQWKYGDVFLENEREFSVNFEEANV  
VAVEITYGLERLAMYLQEVNVDIEWSYADVHLEGEYEFKSYHFEVADT  
IPVEITYGLERLAMYLVQKVENILEIEWRYAQVHLESEYEFKSYHFEVAVS  
VTAEVITYGLERLASYIQEVDSVYDIEWKYGEIFLOPEYEHKSYFEMSDQ  
VTVELTYGLERLASYIQDKENVDFLEWTIRDFYQPEYEHSTYTFKESNT  
VTSEITYGLERLASYIQDKENVDFLEWSYRDIFFQAEFENSTYAFETSNT  
VSVEITYGLERLASYIQGVNDVNDIMYRYGDVFERFEWEHSVYNFEQSDT  
ISVEITYGLERLAMYIQDKDSVDFIEWTYGEIFKRSEWEWSYNFELADT  
IPVEITYGLERLALYIQNKENVYDLEWKYGMRYQFEFENKSYFELASD  
VAELTYGLERLAMYLDQVENVDFVWEKYREVFHRNEVEMSTYSFQASDP  
VAGELTYGLERLAMYVQGIDRVYDLNFTYGDVFLQAEKEYSKHNFEVADT  
VAGELTYGLERLAMYVQGVNDVYDLNFTYGDVFLQAEQEYSRHNFEVADT



|                                 |                          |
|---------------------------------|--------------------------|
| 66855635_Anaeromyxobacter_deha  | RAAYIGRVRALAHDCAKGYLDSR  |
| 39934120_Rhodopseudomonas_palu  | RQSYILRVRELAKACGEAVVHTE  |
| 13476181_Mesorhizobium_loti     | RQSYILRVNRLAKACGEAFLKTQ  |
| 23013834_Magnetospirillum_magn  | RQAYIGRVRALAKACCEGWLASR  |
| 48766000_Rhodospirillum_rubrum  | RAAYIGRVRALAKGCCGWLRRAR  |
| 68213209_Methylobacillus_flage  | RATYIGRIRNRLARAVAASYLDSR |
| 56476158_Azoarcus_sp.           | RAAYIGRIRNLSRAVAQAYSASR  |
| 26986806_Pseudomonas_putida     | RQRYILRVRTLARDVAQSYLQAR  |
| 1573948_Haemophilus_influe      | RQRYILRIRALTKGVAEAYYASR  |
| 46580307_Desulfovibrio_vulgar   | RTGYIGRVRYLASGVARLYAAQR  |
| 68179079_Desulfuromonas_acetox  | RAHYIGRVRNLSRLCAEGYVAQR  |
| 39982448_Geobacter_sulfur       | RASYIGRVRNVARLCAEGYLKLR  |
| 68207211_Desulfitobacterium_ha  | RTGYIARVRNRLARLCAQAYVEQR |
| 72382617_Prochlorococcus_marin  | RTKI IARIRSLARKVAEAWLEER |
| 17131075_Nostoc_sp.             | RTRYIARIRHLARKVANLYVEQR  |
| 46135082_Anabaena_variab        | RTRYIARIRHLARKVANLYVEQR  |
| 68230324_Frankia_alpha          | RATSFAQMRGMSREVAQLWRDRR  |
| 68172611_Frankia_sp.            | RATSFAQMRGLSREVATLWRDRR  |
| 28572421_Tropheryma_whipl       | RAKAFSLMRTLTKAISATWVESR  |
| 46399968_Parachlamydia_sp.      | RTGYIGRIRELAKQVAESYIKSR  |
| C_130039_Chlamydomonas_reinh    | RAECFAVLRGLAREITGLWVSRR  |
| 15836479_Chlamydomophila_pneumo | RTRYIARIRQLTRLVADSYVEWR  |
| 15605530_Chlamydia_tracho       | RTRYIAKIRQLARAAADKYVAWR  |
| 55296761_Oryza_sativa           | RARYFGRMRSLARQCAQLVWVTR  |
| 30692978_Arabidopsis_thalia     | RARYFGRMRSLARQCAQLWLATR  |
| CM269_Cyanidioschyzon_merolae   | RAAYFRMRSLAREVAALWLERR   |

\* . . . . :

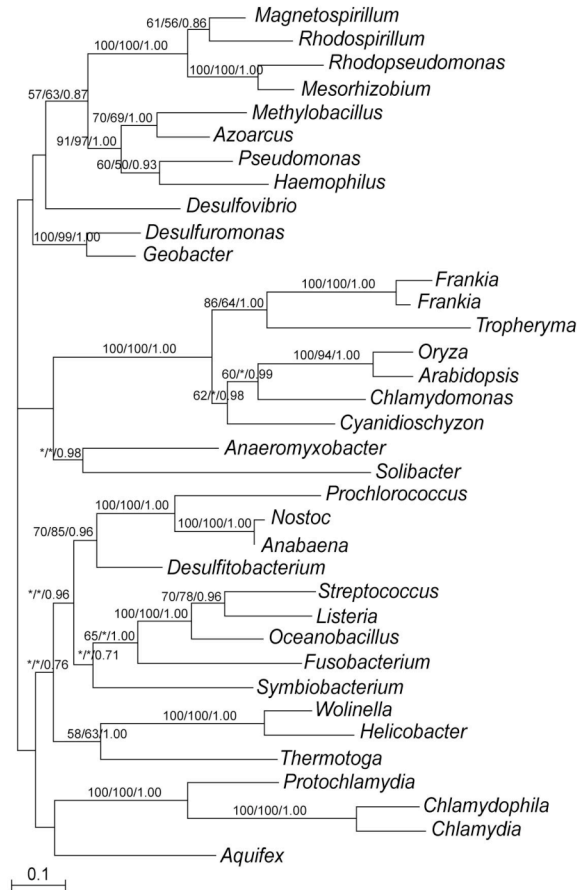

**Figure 2A.** Molecular phylogeny of alpha subunit of glycyl-tRNA synthetase. P-value = 0.838 from AU test on the presented tree. AU tests were also performed for alternative topologies, including (A) monophyly of cyanobacterial and photosynthetic eukaryotic sequences, (B) monophyly of cyanobacterial, *Frankia*, *Tropheryma*, and photosynthetic eukaryotic sequences, and (C) monophyly of chlamydial, *Frankia*, *Tropheryma*, and photosynthetic eukaryotic sequences. These tests investigate different evolutionary scenarios, including a) plastidic origin of photosynthetic eukaryotic sequences, b) photosynthetic eukaryotes acquired this gene from plastids and subsequently spread to *Frankia* and *Tropheryma* by a secondary HGT event, c) photosynthetic eukaryotes acquired this gene from chlamydiae and subsequently spread to *Frankia* and *Tropheryma*. P-value < 0.001 from AU test for topology A whereas P-values = 0.247 and 0.287 for topologies B and C, respectively. Therefore, the scenario of a plastidic or chlamydial origin of this gene in red algae and green plants, though less parsimonious, cannot be confidently rejected.

## 2B. Beta subunit

CLUSTAL X (1.83.1) multiple sequence alignment

```

68172611_Frankia_sp.          LFEIGTEELPAAEVTRTVEAVRAGLVERLAATRLTLGTPRRIVAIIVDEVA
68230323_Frankia             -----MTRQTAAVRAALVERLAATRLTQGTTPRRIVAIIVDDVA
28572421_Tropheryma_whipl    LFEIGTEEMPS--TQEIITVENTLREKLGRSQLKDATTRIVIRIYKMH
46399968_Parachlamydia_sp.   VIEIGSQELPASFVSIIGGNLERAIRALLEKEGISYGTTPRRIAVYIYQLS
C_130039_Chlamydomonas_reinh  VLEVGGEELPPDDVSAVHQLRERVPALLAKLRLSEGTPRRRLAVVVEALA
15836479_Chlamydomophila_pneumo LLEIGSEELPATFVPTIGIQLESARQVLTDHNIVLGSPRRLLALLVKNVA
15605530_Chlamydia_tracho    LLEIGSEELPATFVPTIGIQLESARQVLTDHNIVLGSPRRLLALLVKNVA
55296761_Oryza_sativa       VLEIGTEELPPHDVIEATKQLEKSLIQILEKRRLSYGTTPRRLAVVVENLN
30692978_Arabidopsis_thalia  IIEIGTEEMPPQDVINASEQLRVLVLELLENQRLRFGTTPRRLLVVLVDAMS
CM269_Cyanidioschyzon_merolae LIEIGTEELPPADLDAVEQLREHLLQLLHSSRLLRATPRRHAILVEGVA
34482366_Wolinella_succin    LIEIGIEELPAIPFLRELPHLLSKWNTLLQKYMFEYTPRRLLVLLSQAFP
15611973_Helicobacter_pylori  LVEVLVEELPAQALLNEYKEMPKKHALFQKRALEFYTPRRLLCFVKDFP
15607085_Aquifex_aeolic      LIEIGTEELPAGVINPALDYLKDKINSLNARQVKYGTTPRRLLTYFKDFE
66855634_Anaeromyxobacter_deha LFEIGAEIIPAGFVPGALRQLEDDLAKALADARLAVGTTPRRLAVWARDVA
46580306_Desulfovibrio_vulgar VLEIGTEELPARFLPALERELAEERFTRALADAGIEMSTPRRAVVRMDAVN
4980715_Thermotoga_mariti     LLEVGLLEELPASEFHSILKQLEEKSAELLKAYRVSVFVSGRRFGVILKNLP
68207212_Desulfotribacterium_ha LLEIGTEELIPAKFAPGVNLNQLREQAQKQCQLERLDYTPRRFAVLIQGLA
50914778_Streptococcus_pyogen LIELGLEELPAYVVTPSEKQLGERLATFLTENRSLFSTPRRLAVRVSGLA
17133246_Nostoc_sp.         LLEVGTTEELPASFLGGAIQWRSRIQSLAANSLTYGTTPRRLAVLITGLP
45508785_Anabaena_variab     LLEVGTTEELPASFLSGAIQWRSRIQSLAANSLTYGTTPRRLAVLITGLP
72382003_Prochlorococcus_marin LLEIGTEELPADLAESVISQLELSVNNDLNSAQIKTTPRRILTALTEGIA
46907686_Listeria_monocy     LLEIGLEEMPAYVVTSSVLQLEKRVTDWLKDNQIEYSTPRRLTVLVEEMA
23099403_Oceanobacillus_ihyen LIEIGLEELPARFIDDAELQLYTKTKQWLEENRISYSTPRRLAVFVKNMA
68179078_Desulfuromonas_acetox FLEIGTEEIPAGMLPVAMRDLERMMRKELTNARVAYATPRRLVLSVADVA
39982449_Geobacter_sulfur    FLEIGTEEIPAGFPLPKAMADMEAIVTKELENARLAFATPRRLALVVKGLP
51891713_Symbiobacterium_therm LLEIGTEEIPARFCAPALEQLKENAALAEARLDFGTTPRRLLVLYVRNLA
67931182_Solibacter_usitat   LLEIGTEEIPDWMITTALENLRMS----FEKLEITDATPRRLVLRVEGVP
1573946_Haemophilus_influe   LVEIGTEELPPKALKTLATSFDNVEAELNQAGLSFAAPRRLAVKVLNLA
26986805_Pseudomonas_putida   LVELGTEELPPKALASLGDAFLAGIEKGLQAAGLNAAAPRRLAVLIRQLD
13476182_Mesorhizobium_loti   LLELRSEEIPARMQRKAAGDLKMLTDGLVEAGLTYWTPRRLLTDLRGLT
39934122_Rhodospseudomonas_palu LLELFSEEIPARMQGAADDLKRLVTDKLVAEGLVFATPRRLTLTVHGIP
23013833_Magnetospirillum_magn LLEIFSEEIPARMQARAADDLRGMVTDGLAKNGITYVTPRRLLVLEGLP
68213210_Methylobacillus_flage LVELFVEELPPKALQNIIGISFADQIYHSLVTDQLIFASPRRIAVWIRNVT
                                     :      .**      .

68172611_Frankia_sp.          PREPDVERVVRGPPTKAAVGFARGQGHVALVRTEAGRDAARVLAVGAVL
68230323_Frankia             PREPDVERVVRGPPTKAAATGFVARGQGHVALVRTDTGRPATEVLAEVGAVL
28572421_Tropheryma_whipl    PRQSDSVVIRIRGPPDALTGFLKANGVFITK-NIPGQSAAKLLEQIAEIV
46399968_Parachlamydia_sp.   KGKPSQTIIEKKGPIKIVAGEGFFRSLGYLFGSVKQEGRATTSILAEPKLLI
C_130039_Chlamydomonas_reinh  AAQTSSESKVRGPPTKALEGFCRKNQYVWAVVKDAGRPAVEVLTDEPALV
15836479_Chlamydomophila_pneumo PEVVQKAFKKGKGVSPQGGQFFASQGYLFLHPEIRLRTADILMQEPLLI
15605530_Chlamydia_tracho    HVTIRPESEKKGKGVSPQGGQFFSSHGYLFLVPEERKETAAILVNEPQLI

```

55296761\_Oryza\_sativa  
30692978\_Arabidopsis\_thalia  
CM269\_Cyanidioschyzon\_merolae  
34482366\_Wolinella\_succin  
15611973\_Helicobacter\_pylori  
15607085\_Aquifex\_aeolic  
66855634\_Anaeromyxobacter\_deha  
46580306\_Desulfovibrio\_vulgar  
4980715\_Thermotoga\_mariti  
68207212\_Desulfitobacterium\_ha  
50914778\_Streptococcus\_pyogen  
17133246\_Nostoc\_sp.  
45508785\_Anabaena\_variab  
72382003\_Prochlorococcus\_marin  
46907686\_Listeria\_monocy  
23099403\_Oceanobacillus\_iheyen  
68179078\_Desulfuromonas\_acetox  
39982449\_Geobacter\_sulfur  
51891713\_Symbiobacterium\_therm  
67931182\_Solibacter\_usitat  
1573946\_Haemophilus\_influe  
26986805\_Pseudomonas\_putida  
13476182\_Mesorhizobium\_loti  
39934122\_Rhodopseudomonas\_palu  
23013833\_Magnetospirillum\_magn  
68213210\_Methylobacillus\_flage

MKQMEEEIELRGPPPTKAAEGFCRKNNYIYARVKESARFADEVLTEDPTII  
SKQLEEEVEVRGPPPTKAAEGFSRRYGYVHARVTEPARLALAEVLSDEPGIL  
HKQPDQWTQIRGPLETAVGQAFQORHQYIFLNRITIQGQRALPLLHERDSVL  
LEQPELKEALFGPPTKAAESFAAKCGVLFYSKTSAGESAKRLLPLMEEWI  
LLTQETKEEFFGPLNALGLGFYQKLGVLVYHAKIHAKOPTKDLIMPILFEFL  
NERKEKKEVIWGPPTKALEGFLKKNVAVIRKVIKESPIEK-LQEEEEIL  
PKQTDARTEAFGPPTPAATGFARSQGRVAVTKVEKGRKAEQVLPALERLV  
PVQSESEEVVTGPLTKAAEGFARTQGYIAVRKHMGGARSIDLLRDIPIAI  
ERQEDFTEKKGPPTRALEGLRNNNVYLSR-VVEGKPVVEVLPDLRDLV  
EKQTDFTAQVKGPPTKAAQGFARGQGYVYARKFELGQPTLQLLKLTDLI  
AQQTDLTEDFKGPPSKAAQGFVRGKGYVYVTKHEAGKPAKEVLLGVTEVL  
SQQPDREEIKGPPPTAAVGFACKQGFVFIQKKTGPRPVADILTELPQWI  
SQQPDREEIKGPPPTAAVGFACKQGFVVFQKKTGPRVVAELTELPQWI  
PFSEDNIAERKGPPTKAAIGFAKRYEYVFAKSIKKGKPVTTVLSYDPRWI  
EQANRVTEAKGPPWSKAALGFAKSQKYIYIKKEVIGKTTALLPSLEKVV  
EKQSSIEEDVKGPPTKAAQGFRTKQGYIYVTKHIEGRPIQELLPEFKSII  
EEQERQELNLSGPPTKAAALGFARSNGYLFLSKVIEGQPIKEQLPEIRIV  
TVQPDAEITLGGPPSKAAEGFARGQGYVAARVESGRPVDDLAEIPLRLV  
LRQRDVEVEVKGPPTPARKFAEGQGYLWARKRIQGESVETVLPPLAGLV  
AKQQDSEERILGPPPKAVEGFARKQGYVYVQKVPGRFIKDLIAEAPGII  
TQQPSKEIEKRGPPPTKAAEGWARGCGWLIHRAKIEGQPTKNLLNDIANAL  
VQPDPRISINIDGPPPTQALGFAKCG-LRFSQHIPGKATVGLLPTDLSL  
ARSKDIREIKGPPPEQAVQGFRLKAGFYVAHISKPGRAAEEIAQLPGII  
ARQPDLDKDERKGPDDAAVQGFLLKATGFYVALIEKPKPAIDVIAQFPVIV  
LAGPDVSEKRGPPQAAMEGFLKSTGFYFAVINRKRGRPTAEVLSEVEATM  
QKAPDKQLAQKLMATPALLKLAALGVLLLDRTVVRGATLAEGLQKADAEI

: :

68172611\_Frankia\_sp.  
68230323\_Frankia  
28572421\_Tropheryma\_whipl  
46399968\_Parachlamydia\_sp.  
C\_130039\_Chlamydomonas\_reinh  
15836479\_Chlamydomonas\_pneumo  
15605530\_Chlamydia\_tracho  
55296761\_Oryza\_sativa  
30692978\_Arabidopsis\_thalia  
CM269\_Cyanidioschyzon\_merolae  
34482366\_Wolinella\_succin  
15611973\_Helicobacter\_pylori  
15607085\_Aquifex\_aeolic  
66855634\_Anaeromyxobacter\_deha  
46580306\_Desulfovibrio\_vulgar  
4980715\_Thermotoga\_mariti  
68207212\_Desulfitobacterium\_ha  
50914778\_Streptococcus\_pyogen  
17133246\_Nostoc\_sp.  
45508785\_Anabaena\_variab  
72382003\_Prochlorococcus\_marin  
46907686\_Listeria\_monocy  
23099403\_Oceanobacillus\_iheyen  
68179078\_Desulfuromonas\_acetox  
39982449\_Geobacter\_sulfur  
51891713\_Symbiobacterium\_therm  
67931182\_Solibacter\_usitat  
1573946\_Haemophilus\_influe  
26986805\_Pseudomonas\_putida  
13476182\_Mesorhizobium\_loti  
39934122\_Rhodopseudomonas\_palu  
23013833\_Magnetospirillum\_magn  
68213210\_Methylobacillus\_flage

VGLRAERNMRWNPTLSFRPVRWLLALGGETVVPVTVSTLAAGRTTRGHR  
GGLRAERNMRWNPELSFRPVRWVVALGGAVVPVAASTLAAGSTTRGHR  
LEIRSSRNMRWNPKLVSRPIRWLVVALYQORQNLNVRVLSLESGMHRVLR  
GSLDFPKMRWALEITYARPLEWVVALFGKDIIPFAIGNLFSDRITYGHR  
GGLSFKKSMRWSASPAFSPRPLRWLLALHGDTLVPFVYGTLAGATRVLR  
QRMKFPKMWVDSGVEYARPIRWLVVALYGEHILPITLGTIIASRNSFRGHR  
RSIRFPQKMTWDGVEYARPIRWLVVALYGDQILPISLGFVSSGNTSWGHR  
SGISFPKSMRWSNIVFSRPIRWIFALHGDLIVPFCFAGISSGNQSCGLR  
AKISFPKSMRWNSSVMFSRPIRWVVALHGDLVVPFVYGTLAGATRVLR  
AKIQFRSMRWSGVLYSRPVRWLLALDDQVIVPAFVGGVVSAPVTWGLR  
ASLNFSGSMRWGLHENIRPVRWLVLMHGENLIPATLFGISSQKLTIVVHR  
EGLNFGKSMRWGVEKSFIRPIHNICVLFNFNDIEIKKEYGFKTKQATKAHR  
LSVPFPKMRWTKRITFSRPIRWLVVALFNGQVLLKRFGEISSNKTYGHR  
AGLRFRKAMRSRDEVTFAFPRVWVVALGGRLKVRHGEVASGKVITYGHR  
GALPFPKMRWGGDFTYARPMRWLLALFDESVDVDFEYVGGVRSNITYGHR  
LGLNFRKPMRWGE-HEYIRPVHIVAMVDGRVLDLEIFGLRSSRISYKGR  
TGLHFPKMRWALEFRFARPIRWIVLALFGEVIPPFEVGLASGKASRGRH  
SAMTFPVMHWSANFSEYIRPVHTLVLLDDEALDLDLFIHSGRVSRRGHR  
YSLEGKRLMRWGGDVRFSRPIRWLVALLDEAILPLELVNVKSDRISYGHR  
YHLEGKRLMRWGGDVRFSRPIRWLVLLDEAILPLELVNVKSDRISYGHR  
SKIQGRFRMRWGGDFRFSRPIRWIVLSDSEVLFPKISIGIIGNISRPHR  
TSMTFPVMHWNLDLRYIRPIKWLIAMFGEEIPFEITGVSTNSTRGHR  
ESITFGKNMRWGETIRYARPIRWLVAMMGNEVIPPFEIAHVATNNVITYGHR  
SLSLFPKSMRWKLDVRFARPIHVIWALFVGGVIPPFSWGNLTSRNTSYGHR  
GGIPFRKSMRWALDVRFARPIHVIWALFVGGVIPPFSWGNLTSRNTSYGHR  
TSIHWPKAMRWARELRYARPIKWLIALLDGWRVPPFDVGIETVSTTRGHR  
LGLYFPKTMVYTGPRFIRPIRWIVALLGEEIPPELAGVRSRSGALTSRGRH  
AKLPIPKMRWAKTVQFIRPVHTVMTLLGDELIEGELIGVASARTIRGHR  
NDLPIPKMRWA-REEFVRPTQWLVMLLDGQVVDCTILSQKAGRESRGRH  
RNFPPWPKSMRWGGLRWRVPLQSVLCTFGPVVVDVFEIDGIRSGNITYGHR  
RTFPWPKSMRWGGLQVWRPLHSIIATFGPDVVFHNVGDIAGQMTTRGHR  
AAFPPWPKSRWGNIRWVRPIQSILALFEGHVVPVEFGPAKSGDMTCGHR  
AKLPIPKVMTYQSNVNFVRPAHGLVALHGNEVVPVIRALGLTAGNRTQGHR

. : \* \* . : :

68172611\_Frankia\_sp.  
68230323\_Frankia  
28572421\_Tropheryma\_whipl  
46399968\_Parachlamydia\_sp.  
C\_130039\_Chlamydomonas\_reinh  
15836479\_Chlamydomonas\_pneumo  
15605530\_Chlamydia\_tracho  
55296761\_Oryza\_sativa  
30692978\_Arabidopsis\_thalia  
CM269\_Cyanidioschyzon\_merolae

RAGPLDVPSASGYPELLAARILLDPVVRRELVVVLTEVANLVEFPVPCILG  
RAGPIEVTGAVGYPELLAENVLLDPAARRELVVLDVETNLVEFPVPLG  
NSKIVPVKAADNYEFLTRNVILSRKRREIFPIEITDLVEAPSLVIC  
QLSAIHLHDHAKNYLKSLSHQHVMADPNEREESILVIPQVNLNVEVPLYTIS  
NAATLPVPSAEAYLPALAAASLPGAGRAEAIWLLLEVNTLVEAPSVVMG  
QLDKISISSPQDYVETLRQAVVVSQKERRMIELIEEATFLSEHPVFCG  
QLDQLTIPSSNMVVDTLRSVIVSOKERRAIKLIIDETVFLTEHPVISA  
NSSNFVAAEELYLHTLEKAILDMQERKQRIILLVQEVINLVEAPMPIIG  
NTASLLVQNAESYEDTMRNSINIEIERKKIILLNEVANLVEAPVPLIG  
ASGPQLPVSHAQLYDRVLERNIVAEVSAREQSIMLHEVARLIESPQVLLG



66855634\_Anaeromyxobacter\_deha  
46580306\_Desulfovibrio\_vulgar  
4980715\_Thermotoga\_mariti  
68207212\_Desulfitobacterium\_ha  
50914778\_Streptococcus\_pyogen  
17133246\_Nostoc\_sp.  
45508785\_Anabaena\_variab  
72382003\_Prochlorococcus\_marin  
46907686>Listeria\_monocy  
23099403\_Oceanobacillus\_iheyen  
68179078\_Desulphuromonas\_acetox  
39982449\_Geobacter\_sulfur  
51891713\_Symbiobacterium\_therm  
67931182\_Solibacter\_usitat  
1573946\_Haemophilus\_influe  
26986805\_Pseudomonas\_putida  
13476182\_Mesorhizobium\_loti  
39934122\_Rhodopseudomonas\_palu  
23013833\_Magnetospirillum\_magn  
68213210\_Methylobacillus\_flage

68172611\_Frankia\_sp.  
68230323\_Frankia  
28572421\_Tropheryma\_whipl  
46399968\_Parachlamydia\_sp.  
C\_130039\_Chlamydomonas\_reinh  
15836479\_Chlamydomonas\_pneumo  
15605530\_Chlamydia\_tracho  
55296761\_Oryza\_sativa  
30692978\_Arabidopsis\_thalia  
CM269\_Cyanidioschyzon\_merolae  
34482366\_Wolinella\_succin  
15611973\_Helicobacter\_pylori  
15607085\_Aquifex\_aeolic  
66855634\_Anaeromyxobacter\_deha  
46580306\_Desulfovibrio\_vulgar  
4980715\_Thermotoga\_mariti  
68207212\_Desulfitobacterium\_ha  
50914778\_Streptococcus\_pyogen  
17133246\_Nostoc\_sp.  
45508785\_Anabaena\_variab  
72382003\_Prochlorococcus\_marin  
46907686>Listeria\_monocy  
23099403\_Oceanobacillus\_iheyen  
68179078\_Desulphuromonas\_acetox  
39982449\_Geobacter\_sulfur  
51891713\_Symbiobacterium\_therm  
67931182\_Solibacter\_usitat  
1573946\_Haemophilus\_influe  
26986805\_Pseudomonas\_putida  
13476182\_Mesorhizobium\_loti  
39934122\_Rhodopseudomonas\_palu  
23013833\_Magnetospirillum\_magn  
68213210\_Methylobacillus\_flage

68172611\_Frankia\_sp.  
68230323\_Frankia  
28572421\_Tropheryma\_whipl  
46399968\_Parachlamydia\_sp.  
C\_130039\_Chlamydomonas\_reinh  
15836479\_Chlamydomonas\_pneumo  
15605530\_Chlamydia\_tracho  
55296761\_Oryza\_sativa  
30692978\_Arabidopsis\_thalia  
CM269\_Cyanidioschyzon\_merolae  
34482366\_Wolinella\_succin  
15611973\_Helicobacter\_pylori  
15607085\_Aquifex\_aeolic  
66855634\_Anaeromyxobacter\_deha  
46580306\_Desulfovibrio\_vulgar  
4980715\_Thermotoga\_mariti

ARLADARFFFEEEDRKRKLHERIEDLGRRTFQAKLGSELDRAQRIGAVLLE  
ARLEADARFFWKTDLASSFDWLASLDNVI FLGPLGSMGDKTRRLEQLAAR  
ARLEDARYFFQKDLLETPLEKMNEKLEIVFQEKLGTLVDKVERIKKIVLE  
ARLEDAAFYREDQKTPLAELVEKLDKVTYHEKLGSVRQRVERIRTLVER  
ARLEDEGFFWREDQKQLIADLVAKLTNVTFHEKIGSLAEHMDRTRVIVDR  
ARLADGQFFYKTDLSKSLESYLPQLETVTTFQEDLGLSRGKVERIVKVNQR  
ARLADGQFFYKTDLSKSLESYLPQLETVTTFQEDLGLSRGKVERIVKVNQR  
ARFADASFFIKSLLISSSRIDKLDVTFEAGLGLSYERVNRIEWLSVK  
ARLSDADFFYQEDLKITIDEAVAKLQNVFHEKLGTLTEKMKRVQKVIIR  
ARLADAEFFYNEDLHQSIDFFQEKLTQVVFQEKLGTSYSDKVERMKQIER  
ARLSDAMFFWKEDQKTPLENRLEALKNVVYQAQLGTSYAKVQRFTALTRR  
ARLSDARFFFEEEDQKVKLETRVESLKNVVYQKLGTSYEKMERFRALTSR  
ARLSDARFFWDEDRRQPLESFNARLKEAVFQEKLGTFERVELVLSAAR  
ARFNARDFWADQKPLAARKQDLANVTFOAKLGSYLKTRERMALAVR  
PRLTDAEFFFKTDLQKLVDRPLRLETVLFQQLGTLKDKDTERIEQLAKR  
PRLTDAEFFFKQDKKQPLETFNERLKNVVYQAQLGTVYDKAERVSRLAGR  
ARLSDALYFWTTDQGDLPDLGQLEASAEFFHAKLGTQGERVIRRLAAR  
ARLSDAKFFYDLDLTKLEDRLPKFDQIVFHEKLGTAERIAIERLTKR  
ARLSDAKFFWDTDRKQRLSRLPKLAERTFYASLGTVDKVERIAGLAER  
PRLADAKFFFEQDRKKTLESRIPLGSKVVYHNKLGSGGERIARVSEIASQ  
.\* \* . : \* : \*\*: : \*

AAALAKFDLATQMVIELSSLAGTMAREYARRAGEPEAVAVALFEMDQLPD  
AGELAKFDLATQMVIELSSLAGTMAREYARRAGEPEAVAVALHEMGTLP  
SAAIAKFDLASQMVTEPELSGFMAKIYAQRAGKPEVAQALDEHMSLPL  
AALLSKADLASNMVYEFPELQGTIGRYALANREAEIAQAI DEHAPLVE  
AAHLCKADLATSTVTEMTALAGTMGRHYAAKQGLPAAVSEAVFEADLLPS  
ATQYCKADLVSAVVNEFPELQGMGEYLLKXANLPTASAVAVGEHQKLL--  
AIHYCKADLVSSVVNEFPELQGMGRYLLQNASLSRAAALAI GEHSI--  
AAALAMSDLATNIVTEFTSLAGIMARHYALRDGLSEQIAEALFEIDVFPK  
AASLAMSDLATAVVTEFTALSGIMARHYALRDGYSEQIAEALLEIDVIPK  
VPSPCDSPVDTASPRMRAQSPPTDWEQYARKQGYRDDVARLEFIDQVPR  
AATLAKADLMSEVTYEFTELQGTIGYLLGKGDPLVYALKEQSELPS  
AIQIAKADLLESEVVYEFSELQGMGEYLLKXQNELEVALSVEKQAPLPS  
AVWLSKVDLLTEMVKELDELQGMGYVYAKAQGYDEEVAKALWEQDKVPE  
ASRLAKVDLNTGMVGEFPELQGMGAHYARLEGLKPEIADAI EDHEMPR  
AGRLSKGDLVSGMVGEFDTLQGMGGIYARRMGEAEVAQAI AEQSPVPS  
AASICKADIASKVVYEFPELQGMGRIYALREGINEE IATAIEDHSEEPQ  
TALLAKADLVTLMVYDFPELQGMGADYARMVGEKPEVCTGILEHDELPO  
AAQIYKFDLVTGMVGEFDELQGMGEYALLSGEDAATAI REHGALPE  
AALLCKADLVVTQMVFEFPELQGMGQYAVASGESPEVSTAI VEHLLPQ  
ATLLCKADLVQMVFEFPELQGMGQYAVASGESPEVATAI FEHDILPQ  
VAHFSKHDLVSNMVEFPELQGIIGSKYLLHEGESRDVCLGVLEHDSLPS  
LTNIYKFDLVNTIVGEFPELQGLMGEKYALLQGEKPAIATAI REHGDLPQ  
AAEISKFDLMTSMVNEFTELQGIIGEKYANHFGENSATSQA I KEHDDLPO  
AAQLCKCDELTEGMVYEFPELQGMGREYAAIEGEDPRVAKAI FEHGDLPQ  
AAFLLCKADLVSGMVGEFPEVQGMGREYALLQGEDAEVAAA I AEHGDLPQ  
AAWLCKADLMTRMVFEFPEVQGMGQYLLHQGGDP AVAAE IYEHDDLPR  
AAELCKADLTTELKVEFTELQGVVGGLYARVQGEPEAVWQAI YDHDLPR  
AGLLSKCDLMTNMVFEFTDTQGMGMHYARHDGEDEEVAVALNEQDELPK  
AGLLSKCDLATEMVGEFPEMVGAVAGY YALNDGEPEDVALALNEQDELPO  
AAVLAKADLQTEVVGEFPELQGMGRK YALLQGEHPSVAAA I EHDVPS  
AAKLCADLLETVVGEFPELQGLMGKY YALAQGEDASVAAACEHDRVPT  
AARLAKADLSELVGEFPELQGLMGRY YALNDGENPLVADAI AAHDSCTP  
AAQLAKADLVTDVGEFPELQGMGRY YAQHEGLSDDIAYAI EDHDLPR  
: :

TAPGGLLALADRLDLLVGLFALDAAPTGS SDPFGLRRAALGVAAIAGFAA  
TVPGALLALADRIDL LAGL FALDAAPTGS SDPFGLRRAALGVTAIASFAR  
TQAGAILSIADRLDQLVAMTALGITSTGSSDLFGVRR TASGLVDSIQFLE  
TETGTIISLADKLDNLIGCFSIGLKPTSSSDPYALRRQVLGVIKMSQFHS  
SPAGVLVAVADRLDLSVGLFAAGCAPSAATDPFALRRAAYGMLQTRLRK  
STIGTLLSLDLDRDLNLACFILGLKPTSSSDPYALRRQSLVLETLKLA  
STTGALLSILDRIDNLSCF ILGLLPTSSSDPYALRRQSLLETLQILKT  
TDPGIVLAVTDRLDLSVGLFGAGCQPSSTNDPFLRRISYGLVQIEDFPK  
TDAGMVLAI GDRDL DLSVGLFAAGCQPSSTNDPFLRRISYGLVQIEMFPK  
TPAGVALALSDRMDLSVGLFGI GLAPKANSDFGLRRAALGVVQIERFRD  
SPFSAILALAHRLDNLMLGFLS LGRIPTGSKDPFALRRAASGVLRISEGKS  
SVFSSIVALSLKIDSLFLSFGKIPSGSKDPFALRRLSFGLLKI QKEL  
TTGTITLSLSDKIDNLYSFFKAGEIPKGS SDPYGLRRAAFGIKIPEFPS  
SDLGAVALADRLHSLVGIIGVGEKATGAADPFLRRAAIGLRIIDPFGS  
SMCGALLSIADKADTLAGCFGLGMIPTGAADPYALRRCVLGIARIDDFAS  
TVIGSILGIADRIDTIVGNFAIGNVPTSSKDPYGLKSKADTIFRIPEFQD

68207212\_Desulfitobacterium\_ha  
50914778\_Streptococcus\_pyogen  
17133246\_Nostoc\_sp.  
45508785\_Anabaena\_variab  
72382003\_Prochlorococcus\_marin  
46907686\_Listeria\_monocy  
23099403\_Oceanobacillus\_ihyen  
68179078\_Desulfuromonas\_acetox  
39982449\_Geobacter\_sulfur  
51891713\_Symbiobacterium\_therm  
67931182\_Solibacter\_usitat  
1573946\_Haemophilus\_influe  
26986805\_Pseudomonas\_putida  
13476182\_Mesorhizobium\_loti  
39934122\_Rhodopseudomonas\_palu  
23013833\_Magnetospirillum\_magn  
68213210\_Methylobacillus\_flage

SYTGQIVSVADKLDIVGAFGIGIQPTGSQDPYALRRQAQGVVITFVFP  
TKVGAVALADKLDLTLSSFFSVGLIPSGSNDPYALRRATQGIIVRIENYKP  
TLTGQVVGLADRLDTLVSIIFGLGLIPTGSSDPFALRRAANAVVNIPTLTK  
TLTGQVAGLADRLDTLVSIIFGLGLIPTGSSDPFALRRAANAVINIGTLTK  
NNLGNVSLAERFELLISYAKGERPSSGSDPYALRRAANGILLINLTLNL  
TDLGSLIAIADKLETLIGFFCVNIAPTGSADPFGLRRSAFGAVRIEWFRRP  
TVIGSVVSVADKLDTIAGCIAVGLVPTGSDPYGLRRQAASAILRIETFFKP  
DNVGAVFVSIADKIDTICGFCFVGLIPTGTADPYALRRAAIGVNLPIEFEEA  
SDIGAFVSIADKLDITICGFCFVGLIPTGSADPYALRRSALGIINIPDFDS  
TGPQIVVALADKLDLTLAGYFISIGLIPTGSDPYALRRAAQGVVQTPPEFAA  
NATALIVSLADKLDTLRGCFCFVGMVPTGSKDPFALRRAAQGVVRIIDFEP  
SLVASAVALADKFDLTLTGIFGIGQAPKGSADPFALRRAALGALRIDSAAE  
TLTGAAVAIADKLDLTLVGFVGLIPTGSKDPYALRRAALGVLRIPPEAEA  
DPVSVAVADKLDLTLVGFVAIDEKPTGSKDPYALRRAALGVVRIIDGKN  
DPVSVAVADKLDLTLVGFVAIDEKPTGSKDPYALRRAALGVVRIIDGKN  
APVSVAVADKLDLTLVGFVAIDNERPTGSKDPFALRRAALGIIRLDDGAN  
NKVGMIVALADKLETLTAGLFSIGEKPTGKDPFALRRAAIGILRIPEAAS  
. . : : . . . \* : : :

68172611\_Frankia\_sp.  
68230323\_Frankia  
28572421\_Tropheryma\_whipl  
46399968\_Parachlamydia\_sp.  
C\_130039\_Chlamydomonas\_reinh  
15836479\_Chlamydomonas\_pneumo  
15605530\_Chlamydia\_tracho  
55296761\_Oryza\_sativa  
30692978\_Arabidopsis\_thalia  
CM269\_Cyanidioschyzon\_merolae  
34482366\_Wolinella\_succin  
15611973\_Helicobacter\_pylori  
15607085\_Aquifex\_aeolic  
66855634\_Anaeromyxobacter\_deha  
46580306\_Desulfovibrio\_vulgar  
4980715\_Thermotoga\_mariti  
68207212\_Desulfitobacterium\_ha  
50914778\_Streptococcus\_pyogen  
17133246\_Nostoc\_sp.  
45508785\_Anabaena\_variab  
72382003\_Prochlorococcus\_marin  
46907686\_Listeria\_monocy  
23099403\_Oceanobacillus\_ihyen  
68179078\_Desulfuromonas\_acetox  
39982449\_Geobacter\_sulfur  
51891713\_Symbiobacterium\_therm  
67931182\_Solibacter\_usitat  
1573946\_Haemophilus\_influe  
26986805\_Pseudomonas\_putida  
13476182\_Mesorhizobium\_loti  
39934122\_Rhodopseudomonas\_palu  
23013833\_Magnetospirillum\_magn  
68213210\_Methylobacillus\_flage

LAAALQVRRIVPDLPAAVDAFFDAVMVMAADPAVRAARLGLLAWIRDLT  
LAAALGRVRRIVPQLPDAVDGFFDAVLVMAADPALRAARLGLLAEIRDVA  
IVQCLKRIDRIKCNLPEAVNNFFDNTLVMTPEEEIRFARLGLLCAIRSYS  
LYEVYKRAKQQLNTMQPALAVLFEQVKILADEPQIRDNRLALLKQVFNFF  
VMAAFSRPTRIVREPLSPIDKFFFEVFMCEQAVRANRLALLRDLAALP  
ITTHNRLKILSDLSNDIQDFLNTVHIANDGAI RNLRISLLLTAMDKF  
IAAMYNRLKILAEQAQSTELFLDSVRVASDDESTRNQRIALIAAQKCF  
IVEAYSRPARI IRELLQPLEDFFTNVFVMAEDERVRNRLALLTKVASLP  
IVEAYSRPTRIVRQLVEPLEDFFNVMVEEERVRNRLALLNLIANLP  
AVTCYLRLPARLVRTLRPSVDAFLDGMVMVDEPALRRNRLNLCARIARIP  
LSTTFKRVANITKKLKPLDQFFDHVLI NCDNTLLKKNRQALIAHIYQAF  
LFSAFKRLANINKGLHAPLEEFKSVLVMKDIEIQNRKNFLWGVYQSF  
VVEAAKRVIRIIPPLKEYIDKFFDNVVMMAEDEKIRNRLISLLKRVENLF  
LAVAFKRVANIQETLEPAVARFFDDVLVMAEDPALRANRLGLMRRVGFALF  
AVLTFKRAANI IREL RPVVDGFFEGVMVMSDDAALRTNRLNLLQALVGRL  
LFVGFERVHNIT-ELKPYIDEYFDNVFVMVKRDDLVRNRLSFLKNI DELF  
YSQAYIRCLNLSKELIPMIEALFNAVMIMVEDEILKQARLALLGECVAI L  
AVESLSRAFNLAEVLSPVINDFFDNTVMMAEDQALKNNRLAILSDLVSKA  
IYETVNRSTRLAAE IAPT VSNFFDGLVVIDPDPEIKRNRNLNLLGLLRNHA  
IYETVNRSTRLAAE IAPT VSNFFDGLVVIDPDPEIKRNRNLNLLGLLRNHA  
LQAVVTRASRLAASSTETLSNFFDGMVMTEDINLRNRLNLLTLRLNQS  
TIEALTRVNI SKDLRTTIDAYFDNTLVMTDNDELKNNRLALLFELASFI  
IQEALVRVNLNSQLAAPIHAFDNNMVMADDLEIRNRLALI QALTSLI  
LAATFKRVGNIIKSLRPAVDAFFDGMVMAEDEAVKRNRLALLTQVAGLF  
LAVAFKRVCNIVKALGAVDDFFDKVMVMAEDERVRTNRLALLTGIARLF  
VTGAFKRVANLAGRLKAPVDAFLDTRVNVNVEDEKVRANRYALLQALGGLL  
LAASFKRIRNILERLRPRVDLFFDKVLVNA PDPVVRQNRLLTLLSTLLAEF  
LAAANKRVSNILANLRAPVDSFFDNVMVNAEDPALRQNRALILNTLQGLF  
LAAVNKRVSNLLSALRDPVDAFFEAVMVNAEDAKVRANRYALLSRLRGLF  
LLAGTKRAANILAAALREPVDSEFFEGVLVND ELEVANRLALLTRIRAAT  
LLAGTKRAANILATLRSVDSFFAKIKVNADDKAVRENRLKLLNEIRAAT  
LLIAYRRAANIVRRLRPVDAFFDKVTVNADEADLRVNRLLKLLAMTGSAM  
LAAANKRVGNILKALKAPVDAFFDHVMVNAEDPALKTNRLALLATLHQAM  
\* : : \* :



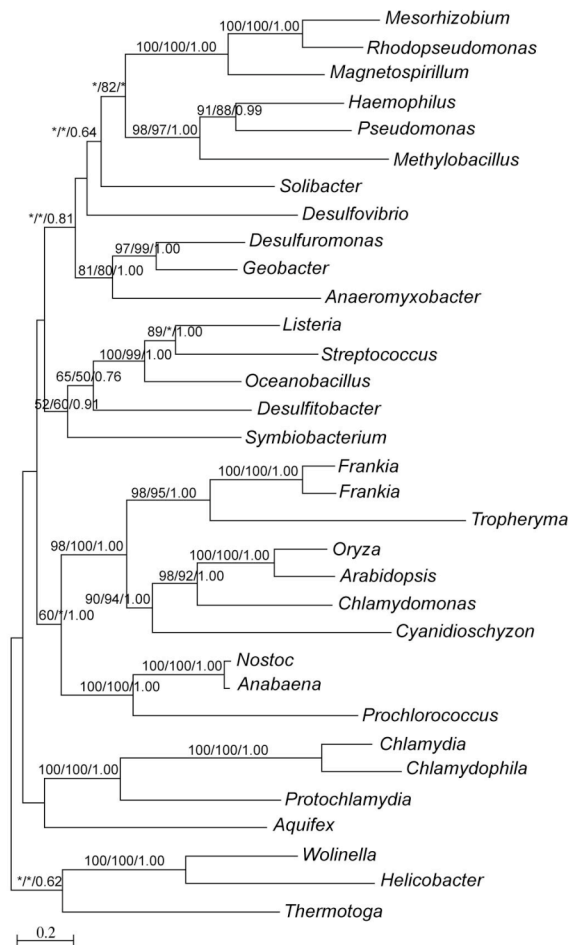

**Figure 2B.** Molecular phylogeny of beta subunit of glycyl-tRNA synthetase. P-value = 0.731 from AU test for the presented tree. AU tests were also performed on alternative topologies, including (A) monophyly of cyanobacterial and photosynthetic eukaryotic sequences, and (B) monophyly of chlamydial, *Frankia*, *Tropheryma*, and photosynthetic eukaryotic sequences. These tests investigate different scenarios, including a) plastidic origin of photosynthetic eukaryotic sequences, and b) photosynthetic eukaryotes acquired this gene from chlamydiae and subsequently spread to *Frankia* and *Tropheryma*. P-values = 0.085 and 0.446 from AU tests for these alternative topologies respectively. Therefore, the scenario of a plastidic or chlamydial origin of this gene in red algae and green plants cannot be confidently rejected based on these statistical tests. However, given that the two glycyl-tRNA subunits likely acquired from a single event, we have chosen to present this gene here as a likely case of HGT.

### 3. Dihydrodipicolinate synthase (*dapA*) (D)

CLUSTAL X (1.83.1) multiple sequence alignment

15605085\_Chlamydia\_tracho  
88858626\_Pseudoalteromonas\_tun  
119468235\_Alteromonadales\_bact  
77359151\_Pseudoalteromonas\_hal  
83765535\_Aspergillus\_oryzae  
71281575\_Colwellia\_psychr  
31543060\_Homo\_sapien  
119720569\_Thermofilum\_penden  
83770010\_Aspergillus\_oryzae  
33594549\_Bordetella\_pertus  
84321353\_Pseudomonas\_aerugi  
126701253\_Clostridium\_diffic  
CDL00000863\_Cyanophora\_paradox  
71279937\_Colwellia\_psychr  
88857450\_Pseudoalteromonas\_tun  
119468748\_Alteromonadales\_bact  
77362300\_Pseudoalteromonas\_hal  
116057686\_Ostreococcus\_tauri  
115457444\_Oryza\_sativa  
115460042\_Oryza\_sativa  
15225477\_Arabidopsis\_thalia  
30695296\_Arabidopsis\_thalia  
HVL00003027\_Hartmanella\_vermif  
46446320\_Candidatus\_Protoc  
118464138\_Mycobacterium\_avium  
21224090\_Streptomyces\_coelic  
15614962\_Bacillus\_halodu  
88933169\_Dehalococcoides\_sp.  
CM654\_Cyanidioschyzon\_merolae  
67923140\_Crocospaera\_watson  
72383089\_Prochlorococcus\_marin  
56752256\_Synechococcus\_elonga  
37520587\_Gloebacter\_violac  
110637717\_Cytophaga\_hutchi  
53713695\_Bacteroides\_fragil  
15644269\_Thermotoga\_mariti  
55377124\_Haloarcula\_marism  
20093258\_Methanosarcina\_acetiv  
67918442\_Chlorobium\_limico  
94969520\_Acidobacteria\_bacter  
32472136\_Rhodopirellula\_baltic  
23501533\_Brucella\_suis  
113932881\_Caulobacter\_sp.  
24216005\_Leptospira\_interr  
126700845\_Clostridium\_diffic  
GTL00002039\_Guillardia\_theta  
ELL00008008\_Euglena\_gracilis  
16130403\_Escherichia\_coli  
84316486\_Pseudomonas\_aerugi  
33592660\_Bordetella\_pertus  
15606400\_Aquifex\_aeolic  
88935908\_Geobacter\_uraniu

SVLGACITPFKIDFAALESVVRSQEHAG-NGIILFGSTGEGLSLTYYEKL  
PLWTALITPFTVDFDALAKLVAEQVAAN-NGILLGSTGEGALTEFEQK  
ALWTALVTPFDVYDITLTLVSEQEAH-NGILLGSTGEGALTLKEQQ  
SVWTALVTPFNIDYGTTLTVAEQAAAN-NAILLGSTGEGALTLKEQQ  
GFYVPTVAFFAVDVSTVEKHAAYLAQSGITGLVVGQSNGEAVHLDRDERK  
GVYPAVTTQYNINFEATTQMVDTIKEGVNGI IALGTVGENASHTREEKV  
GIYPPVTPFTVDYKLEENLHKLGTFFRPFVVGQSNGEFPLTSSERL  
GVISPFITPFRDLREAVAWLARYQAEKGVHGFNPSTTGEFVHLSREEAV  
GVMVALITPFTIDEGRLKSHIDRLLQAGVHGLVPGGSTGEFTVLSLAERK  
GIWIPLVTPFAVDLPALRRLVRYDKAAGVDGLVACGSTGEEAALDEAEQL  
GIWVPLVTPFRIDFAALPRLLDHLLNAGVAGVVCGTTGEEAALHEGQQL  
GIICAMITPFDINSQATCQLIDYLIKGIYGLFILTNGECHVLTDDDEKV  
ALVTALITPFTLIDITDGLVKEQMKAGVEGLVVGTTGEGHLMNESELL  
SLMTAICTPYTCLKTDFLEIEQQISAGVDGIIVGGTTGEGHLLSWEHLL  
SLITAICTPYQIDLNAYDQLVLAQIDADVDGIIVGGTTGEGQLMNWEEHL  
SLITAICTPYLIDLAKYDKLVEIQIAAGVDGIIVGGTTGEGQLMNWEEHL  
SLITAICTPYLIDLATYDRLVELQIAAGVDGIIVGGTTGEGQLMNWEEHL  
RLITAICTPYLVDLYAYDALVEAQIEGGVEGLIVGGTTGEGQLMSWDEHV  
RVITAVKTPYLPDLEAYDSLINMQIDGGAEGVIVGGTTGEGHLMWDEHI  
-----MQIEGGAEGVIVGGTTGEGHLMWDEHI  
RVITAICTPYLPDLEAYDDLVIQIQNGAEGVIVGGTTGEGQLMSWDEHI  
RVITAICTPYLPDLQAYDDLVTQIENGAEGVIVGGTTGEGQLMSWDEHI  
GVFAPITCFLDAIKDFKHNSRFNKTLDGLVIMGSYGEFPYLSQEK  
GLYTALITPFTLDEEGLKLLIQIQLHHQVDGVVVLGTGESPVTMTOIEKR  
TVLTAMVTPFALDAAAARLANHLVDSGCDGLVVGSTGESPVTDDDEKR  
RVLTAMVTPFTLDLDAQRLAAHLVDAGNDGLIINGTTGESPSTSDEAK  
HVLTAICTPYLPDLEAYDKLVEFLLANGTEGLVAGTTGESPTRLREEKL  
RLITAICTPYLPDLYAQKQLALGLLDSGSDGLVVGTTGESPVTWEEH  
RVITALVTPFKVDYGAESLAAHLAENGSDAIIVAGTTGESATLTWSEY  
KVITAMVTPFDVNYEMAEKLAHLVNNGSDSLVSGTTGESPSTLWSEK  
RLLTAMVTPFDVYGLAADLANYLVDQSDGIIVCGTTGESPSTLWQEQ  
RVITAMITPFFNVAYDIAQSLAVHLVEQSDGLVICGTTGESPSTLWEEEL  
RVLTAMITPFDVHYAEAEKLAHYLAHGSDDLIVCGTTGESPSTLWEEY  
GTGTALITPFKVDYDAFNKLEFNISGVDYIVVNGTTAESATTSKEKA  
GMGVALITPFFVDYDALMRLVDYLLQNNADFLCVLGTTAETPTLSSEKK  
GVGTAIVTPFKLDLESYERLVRYQLENGVNLIVLGTGESPSTVNEDERE  
GVFPAMCTPFFHIDFETLRDDAQRLESAGVDGLVPGSTGESATLSHDEHI  
GAMPALITPFTIDREGLRRNIAFVEEGVSGIVPCGTTGESATLSALEHE  
GSAVALITPFRVDTVALRQLVRFHIAAGTDIIPCGTTGESPSTLSMEEQS  
GCGTALVTPFKVDFAAQRALVEWQIESGIDFLVPCGTTGEPSTLSHDEWL  
GLSTAVITPFRVDEKRLAEQIDFQIDSGVTCIVPCGTTGESPSTLTHEHE  
GSITALVTPFDDEKAFRAFVNWQIEEGTKGLVPGTTGEPSTLSHDEHK  
GVFPALVITPFRVDEKTFVALVERQIAGGVHGLVPGTTGEPSTLSHDEHK  
GVYTAITPFFKIDYDYFKLLEKQIKAGVSGVPCGTTGESPSTLSHSEHA  
GSAVALVTPFTVDFDKLGEVYQIANGTDAIVSCGTTGEANTMTDEEQL  
GSYVALITPFTVDYAKIEELVEWHIAEGTAGIVPCGTTGESPSTLTHEENK  
-----EETK  
GSIVAVITPMDVCRASLKKLIDYHVASGTSIAIVSVGTTGESATLNHDEHA  
--MVALVTPFDLDWDSLAKLVDLHLEQGTNAIVAVGTTGESATLDVEEHI  
GSLVALVTPMQLDYDAYRSLIDWHVAEGTDGLVVGTTGESPSVSMEEHA  
GSIVALITPFKVDYEAALGNLIEFHVNDGTDAILVCGTTGESPSTLTFEEHE  
GSIVAVITPFKVDEEKLRELVFQIENGTDAIVPCGTTGESSTLDYBEHD

15605085\_Chlamydia\_tracho  
88858626\_Pseudoalteromonas\_tun  
119468235\_Alteromonadales\_bact  
77359151\_Pseudoalteromonas\_hal  
83765535\_Aspergillus\_oryzae  
71281575\_Colwellia\_psychr  
31543060\_Homo\_sapien  
119720569\_Thermofilum\_penden  
83770010\_Aspergillus\_oryzae  
33594549\_Bordetella\_pertus  
84321353\_Pseudomonas\_aerugi  
126701253\_Clostridium\_diffic  
CDL00000863\_Cyanophora\_paradox  
71279937\_Colwellia\_psychr  
88857450\_Pseudoalteromonas\_tun  
119468748\_Alteromonadales\_bact  
77362300\_Pseudoalteromonas\_hal

SILSFVSTLVPFVGTATSVQETMSWIDFAQQWPIDGFLVPTPLYTRPG  
EIVTFVCQLVPLMVAVGGFNKQOVQWLEFCNDLPIHAYLLGSPYAKPG  
AIVEHVCQLVPLMVAVGGNLAQQKQWVSYCNQLPIHSHYLLGSPYAKPG  
AIVEHVCQLVPLMVAVGGMNLKQQLAWVEYCNHLPISHFLLGSPYAKPG  
TITAATLDAMPVIVCGGSSTRETIQLCKDAGESGGDYALVLPCCYSLVS  
AALKAVKEVVPVLSGVAETSTQFAIEFSQACEAIGIDGLMVLPGMIYKSD  
EVVSRVRQARLLLAGSGCESTQATVEMTVSMAQVGDAAAMVVTTCYGRMS  
EVTRLVLEAVVWIPGISANYTEDSVLGRFTKDLGVDGAVVTPPYFKVS  
QLTELCVKYVPPVAGTGATSTQEAVELAKHAGEVGAAMVMPVPPYDFPN  
AVLDVLEELPVMAGLAGNHQDHLRRLARLGERPLAGVLAPA-----  
QLLDAVLERERVAMGLAGNQAQLLAFQREVLERPLAGLLVPAPYYIRPS  
EFAKIVINHVPVFGTGGNSTREVVDLSKRMEAI GASALSIIITPYFVTP  
DLIQHSVEKLVIIIGNTGNNSTKALKLTKQGFAGKMHICALQINPPYKTS  
MLIAHCVNKLIIIGNTGNNSTREAIKATENGFMAMDALQINPPYGRTS  
88857450\_Pseudoalteromonas\_tun  
119468748\_Alteromonadales\_bact  
77362300\_Pseudoalteromonas\_hal  
MLIAHSVAKLIIIGNTGNNSTREAIKATQYGFATGMDAALQINPPYGRSS  
MLIAHSANKLLIIGNTGNNSTREAIKATKYGFASGMDAALQINPPYGRSS

116057686\_Ostreococcus\_tauri]  
115457444\_Oryza\_sativa  
115460042\_Oryza\_sativa  
15225477\_Arabidopsis\_thalia  
30695296\_Arabidopsis\_thalia  
HVL00003027\_Hartmanella\_vermif  
46446320\_Candidatus\_Protoc  
118464138\_Mycobacterium\_avium  
21224090\_Streptomyces\_coelic  
15614962\_Bacillus\_halodu  
88933169\_Dehalococcoides\_sp.  
CM654\_Cyanidioschyzon\_merolae  
67923140\_Crocospaera\_watson  
72383089\_Prochlorococcus\_marin  
56752256\_Synechococcus\_elonga  
37520587\_Gloeobacter\_violac  
110637717\_Cytophaga\_hutchi  
53713695\_Bacteroides\_fragil  
15644269\_Thermotoga\_mariti  
55377124\_Haloarcula\_marism  
20093258\_Methanosarcina\_acetiv  
67918442\_Chlorobium\_limico  
94969520\_Acidobacteria\_bacter  
32472136\_Rhodopirellula\_baltic  
23501533\_Brucella\_suis  
113932881\_Caulobacter\_sp.  
24216005\_Leptospira\_interr  
126700845\_Clostridium\_diffic  
GTL00002039\_Guillardia\_theta  
ELL00008008\_Euglena\_gracilis  
16130403\_Escherichia\_coli  
84316486\_Pseudomonas\_aerugi  
33592660\_Bordetella\_pertus  
15606400\_Aquifex\_aolic  
88935908\_Geobacter\_uraniu

MLIAHTAQKVLVIGNTGSNSTREAVHATSQGFVGMDSASLQINPYGKTS  
MLIGHTVNCVVKVGNVNTGSNSTREAIHATEQGFVGMHAALHINPYGKTS  
MLIGHTVNCIKVVGNTGSNSTREAIHATEQGFVGMHAALHINPYGKTS  
MLIGHTVNCIKVIGNTGSNSTREAIHATEQGFVGMHAALHINPYGKTS  
MLIGHTVNCIKVIGNTGSNSTREAIHATEQGFAMGMHGALHINPYGKTS  
QLLKAAKEAM-LIAGTGSTNFRETLELNHYAKELGYDAMVITPPYYSKMN  
RIEIALEEIKVIVGTGSYSTQQAIEQTLQAKQMGADAALIVTPYYNKPT  
ELLRRVLEAARVIAGAGTYDTAHSVRLAKACAAEGAGHLLVTPPYYSKPP  
DLVRVAVVEAAHVAGVGTNNQHSIELARAAERVGAGHLLVTPPYYNKPP  
ALFEKVVTVVPIAGTGSNNTYVSAQLTKKATALGVDGIMAVTPPYYNKPS  
ALFAAVKSAGKVIAGTGANSTQEALENTLKAEEKIGVDACLLVVPPYNNKPT  
ELFRVVKSAACRVVAGAGSNSTEEAIEATKKSAKLGLDGTQVVPYNNKPP  
QLFKVVKKAQKVLVAGTGGNSTQHAIEMTQEVAKMGLDGSLOVVPYNNKPP  
KLELTVRNSAKVLAGTGSNSTSEAIEATKEAANSAGDALVVPYNNKPP  
QLFRVAVKAAAVIAGTGSNCTREAIATQSAATLGLNSLOVVPYNNKPP  
ELFDVVRRAAKVVAGTGSNATREAVVATRKAALGLDGTQVCPYNNKPT  
KLEVALDVVPMYIGGNDTAEVIQRIGSADFQKGDALLSVCPPYNNKPS  
KIKKVIDRIPILLGVGSNNTRAVVETLKNDDFTGVDAILSVVPPYNNKPS  
KLVSRLEIIPVIVGAGTNSTEKTLKLVKQAEKLGANGVLVTPPYNNKPT  
EVVEAVIDAVPVIAGSGSNNTKEALELRRSRAEAGADALLISPYYNKPE  
EVIDIAVECVVAVAGTGSNNTGEALQFTKHAADAGVDGVLISPYYNKPN  
RIIRTVKEEIMVAAAGAGTNDTHAVELAKNAEKAGASAILSVVPPYNNKPS  
KVIAQTVVEVPIVAGATSNNTAEAVEKAKEVAAGVDAILTASPPYNNKPT  
RVISLTIQHVVMAGTGSNSTAEALRLTRRADEGADATLQVAPYNNKPT  
RVIEVCIEVVPVIAGAGSNNTVEAIELAQHAEKAGADAVLVVTPPYNNKPN  
RVLELCVQTPVPIAGAGSNSTAEAEIELVAHAKAVGADAALVSVVPPYNNRPS  
ELIRETVKAIQVVAGTGSNSTKEAIELTEACKDGDVILSVNPPYNNKPT  
ATIKYVVEKVPVIAGSGSNDTMHVSNLQAEKLGVDALLIITPPYNNKAN  
KVIEVTVKCKVVGSGSNSTAKAVKAAQMKDLGCDVLSVIPYNNKPT  
DVMVMTLDLIPVIVAGTGANATAEAIISLTQRFNDSGIVGCLTVTPYNNRPS  
QVIRRVVDQIPVIVAGTGANSTREAVALTAAKSGGADACLLVTPPYNNKPT  
ELIRVAVEHIVPIVAGVANSDEAIIHLARHAKAVGAQAGLSVVPYNNKPN  
KVIEFAVKRIKVIAGTGGNATHEAVHLTAHAKAVGADALVVPYNNKPT  
RVIEIVVEQVPIVAGTGSNSTKEAIEMTSHAKTLGADGALLVTPPYNNKPT

:

15605085\_Chlamydia\_tracho  
88858626\_Pseudoalteromonas\_tun  
119468235\_Alteromonadales\_bact  
77359151\_Pseudoalteromonas\_hal  
83765535\_Aspergillus\_oryzae  
71281575\_Colwellia\_psychr  
31543060\_Homo\_sapient  
119720569\_Thermophilum\_penden  
83770010\_Aspergillus\_oryzae  
33594549\_Bordetella\_pertus  
84321353\_Pseudomonas\_aerugi  
126701253\_Clostridium\_diffic  
CDL00000863\_Cyanophora\_paradox  
71279937\_Colwellia\_psychr  
88857450\_Pseudoalteromonas\_tun  
119468748\_Alteromonadales\_bact  
77362300\_Pseudoalteromonas\_hal  
116057686\_Ostreococcus\_tauri]  
115457444\_Oryza\_sativa  
115460042\_Oryza\_sativa  
15225477\_Arabidopsis\_thalia  
30695296\_Arabidopsis\_thalia  
HVL00003027\_Hartmanella\_vermif  
46446320\_Candidatus\_Protoc  
118464138\_Mycobacterium\_avium  
21224090\_Streptomyces\_coelic  
15614962\_Bacillus\_halodu  
88933169\_Dehalococcoides\_sp.  
CM654\_Cyanidioschyzon\_merolae  
67923140\_Crocospaera\_watson  
72383089\_Prochlorococcus\_marin  
56752256\_Synechococcus\_elonga  
37520587\_Gloeobacter\_violac  
110637717\_Cytophaga\_hutchi  
53713695\_Bacteroides\_fragil  
15644269\_Thermotoga\_mariti

LNGQKAWFDRILSVSPIILYNNPIRTGVSLYPEVVKSFHPLCIGVKDSGG  
IQGQOTQWFDTLNLHNSPCMLYNNVPGRSVAIAPEVLTNLHLRWAMKEASG  
AVGQTLWYFESLNLNESPCMLYNNVPGRSVSIPIETIENLHPLKWLWALKEASG  
VIGQTHWFESLNLNISPCLYNNVPGRSVAVDIPVATIQLNHLKLNWALKEASG  
TEALRDHFRAVASASPVLIYNFPAGASGLDLSDDILALHPNIVGVKLTGCG  
ESEAVNHYQOAIARNCPIMIYNNPVTVYGVVDVGEKMLIEDNIVSIEKATE  
SAALIHHTYKVVADLSPVLYSVPANTGLDLPVAVVTLHPNIVGMKDSGG  
PERLKHVFTSTILEKVP IIVYNIPTATTGINIPVGLYLELHNSLAGAKATVE  
YEQLTEMMSEIHTESPIMYYNIPASGLTLPQOIALDKVGVKYLKDTSG  
-----PLILYDIPYRTGAQLDTATLLALHPNIAAVKDCGG  
QEALVRFHGVADASPLIVYDIPYRTGVRMELETLLRHPNIAAIKDCGG  
QOELILHYKTIANSVPIIMYNNMPGKTGINIEPESVRELIKNIIVGKDSGG  
DAGVLEHLGRLLAEGPVIYNNVPGRTGQDIKPAVVEKL-----  
IRGVSEHFKRVLIDIGPAFIYNNVPGRTGQDLTPPEIIEPLHKNFIVGKECSG  
IAGVKEHLSRVLALGPAFIYNNVPGRTGQDLTPPEIIPFHPNFIGIKECAG  
IAGVKEHFKHVLIDIGPAFIYNNVAGRTGQDLTPDIIEPLHPLNFIGVKECGG  
IAGVKEHLKRVLDIGPAFIYNNVAGRTGQDLTPDIIEPLHEHFIVGKECGG  
RRGLIEHFAGVMDLGPFIYNNVPARTSQDIAPEVMPFELHKNFAGVKECEG  
IEGLISHFEAVLPMGPTIYNNVPSRTGQDIPPAVIEAVFTNLGAVKECVG  
VEGLISHFEAVLPMGPTIYNNVPSRTGQDIPPAVIEAVFSNMAGVKECVG  
IEGLIAHFQSVLHMGPITIIYNNVPGRTGQDIPPAIFKLNPNLAGVKECVG  
IEGMNAHFQTVLHMGPITIIYNNVPGRTGQDIPPAVIFKLNPNMAGVKECVG  
DATLEAYYSKLADAVPLILYNNMPSYSGINMSVSVSKLHKNI-----  
QEGIFKHFEAINQAVPICLYNIQGRGQNIQHTLKRILSSIIGVKETSG  
QRGLIAHFTAVADATPVLLYDIPGRSVVPIESSTIRALHPNIVGVKDAKA  
QEGLYLHFTAIADAAPVMLYDIPGRSGVPIINTETLRLHHPNIVANKDAKQ  
QEGMYAHFAAIAEATPVMLYNIPIRSRVNLSAETIVKLIPIINTVSKKEANG  
QEGLYLHFKTIAEATPCILYNNVSRITHTMNPETVIRLIPNIVGIKEASG  
QOQIMAHFRATANAAPMMLYNIPIGRGTINMTAETSIKLCPNIVALKEASG  
QEGLYEHFKKIAETVPIMLYNIPIGRGTINMSPETAKLIDNIVAIEKASG  
QEGLEVHFRAIANAAPLMLYNIPIGRGTGCSISPSIVSKLCSNVSFKAASG  
QEGLYAHFRATIAEACPLMLYNIPIGRGTGQSLQPETVARLLPNVVAIKAASG  
QDGLFEHFRAVAQAGPVILYNNVPGRTGVHLAPETVARLVPGVIAIKEASG  
QEGVFOHYKAIKAEKCPVLAAYNVPGRTGINISAKTSIRLVKNFIGIKEASG  
QEGYIYQHYKAIASATPIVLYNNVPGRTGVNMTAETTLRIFQNVIAIKEASG  
QEGLYQHYKYISERTGIVVYNNVPGRTGVNVLPEAARILKNVVGIKEANP

55377124\_Haloarcula\_marism  
20093258\_Methanosarcina\_acetiv  
67918442\_Chlorobium\_limico  
94969520\_Acidobacteria\_bacter  
32472136\_Rhodopirellula\_baltic  
23501533\_Brucella\_suis  
113932881\_Caulobacter\_sp.  
24216005\_Leptospira\_interr  
126700845\_Clostridium\_diffic  
GTL00002039\_Guillardia\_theta  
ELL00008008\_Euglena\_gracilis  
16130403\_Escherichia\_coli  
84316486\_Pseudomonas\_aerugi  
33592660\_Bordetella\_pertus  
15606400\_Aquifex\_aeolic  
88935908\_Geobacter\_uraniu

QQGFIDHYTTLADAVPQIVYNVPSRTGQNI EPDTAAELHPNIRAYKAASG  
PAGLLAHFKKIAEAVPMLYVNPVSRGTQDMPVDVITKLVENIVGIKEASG  
QEGIIYQHYARI AEAVPII IYVNPGRGTGSNVAASTILRLFGNIAAVKEASD  
QEGQYLHFKAIAEAVPLVLYNVPGRTAANIETATLLRLIPNI IAVKEASG  
QEGMYQHFRVAVAEAVPVVYNI PGRSAKNI EVDITVRLLPNITMVKEATG  
QRGLYEHFSRVVRSIPLVIYNI PGRSI IDMTPEM GALCKNI VGVKDATG  
QEGIIYQHYKAINDAVPLVLYNVPGRGTGSDVANETLARRLLPNIVGIKDATG  
QEGFLQHFKSI AEHSPVMLYNI PGRTSVNLLEPETVLRVVKQIRSMKEATG  
KAGLKRHFETIANSVPI ILYNVPGRTCVNI SP SLIVELIDNIVAVKEASG  
QDGLYGHFKAVADVGPVMLYNI PGRCGGGLTSATI AKLCPTICAVKEATG  
QDGLYAHFSEVAKVGP IMLYNI PGRCGGGLTSATI AKLLPMVCSIKEATG  
QEGLYQHFKIAIEHTPQ ILYNVPVSRGTCDLLPETVGRVVKNI IGIKEATG  
QEGMYQHFRHIAEAVPQ ILYNVPGRTSCDMLPETVERLVPI IGIKEATG  
QEGIIYRHFRAVAEAVPTVLYNVPGRTVADMSNDTVLRVLPVGI IGIKEATG  
QRGLYEHFKVTAQEVP I IYNI PVRTCVE ISVDTMFKLCNIESKSTP  
QEGFLFHYKAVADAVPQ ILYNVPGRTVGNLLPETVARLHKNI VAIKEATG

\* .

15605085\_Chlamydia\_tracho  
88858626\_Pseudoalteromonas\_tun  
119468235\_Alteromonadales\_bact  
77359151\_Pseudoalteromonas\_hal  
83765535\_Aspergillus\_oryzae  
71281575\_Colwellia\_psychr  
31543060\_Homo\_sapien  
119720569\_Thermophilum\_penden  
83770010\_Aspergillus\_oryzae  
33594549\_Bordetella\_pertus  
84321353\_Pseudomonas\_aerugi  
126701253\_Clostridium\_diffic  
CDL00000863\_Cyanophora\_paradox  
71279937\_Colwellia\_psychr  
88857450\_Pseudoalteromonas\_tun  
119468748\_Alteromonadales\_bact  
77362300\_Pseudoalteromonas\_hal  
116057686\_Ostreococcus\_tauri]  
115457444\_Oryza\_sativa  
115460042\_Oryza\_sativa  
15225477\_Arabidopsis\_thalia  
30695296\_Arabidopsis\_thalia  
HVL00003027\_Hartmanella\_vermif  
46446320\_Candidatus\_Protoc  
118464138\_Mycobacterium\_avium  
21224090\_Streptomyces\_coelic  
15614962\_Bacillus\_halodu  
88933169\_Dehalococcoides\_sp.  
CM654\_Cyanidioschyzon\_merolae  
67923140\_Crocospaera\_watson  
72383089\_Prochlorococcus\_marin  
56752256\_Synechococcus\_elonga  
37520587\_Gloeobacter\_violac  
110637717\_Cytophaga\_hutchi  
53713695\_Bacteroides\_fragil  
15644269\_Thermotoga\_mariti  
55377124\_Haloarcula\_marism  
20093258\_Methanosarcina\_acetiv  
67918442\_Chlorobium\_limico  
94969520\_Acidobacteria\_bacter  
32472136\_Rhodopirellula\_baltic  
23501533\_Brucella\_suis  
113932881\_Caulobacter\_sp.  
24216005\_Leptospira\_interr  
126700845\_Clostridium\_diffic  
GTL00002039\_Guillardia\_theta  
ELL00008008\_Euglena\_gracilis  
16130403\_Escherichia\_coli  
84316486\_Pseudomonas\_aerugi  
33592660\_Bordetella\_pertus  
15606400\_Aquifex\_aeolic  
88935908\_Geobacter\_uraniu

SLRVFCGDDNLPMDRLSGASGVISVLANVWPELARDYVAQGEAWKVKCS  
DLAIYSGDDALMPYFAQAGAKGLVSVAAANAWPNQTAEFVRRSRQWSSAIN  
NLALYSGDDALMPYFAQAGAKGLVSVAAANAWPKQTHEFVKRSAQWTRAIN  
NLAIYSGDDALMPYFAQAGAKGLVSVAAANAWPLQTHEFVQRZQWSSAIS  
NFLTFGGSDAFTLQTLVAGGAGIIGGLGNLIPRSCVYVMKLYAVVARA-D  
DFVIFGGVDDIALESMLGCTGWSGLTNVFPKESVAIYKLLARWFLPLLR  
DFQVLGASAGFLMASYALGAVGGVCALANVLGAQVCQLERLCHRLIEPNA  
SFAVLTGLDDLLPVLMMGGDGMALANAAPQIHREYVDAYHKLRLRVR  
NITAFNGWDTLTFYGMAGAPGCVWGAANVPELAVQLWEAIKAFPICK  
SMAVLAGEDLQGLTCLGGMIAAAAHVRPDLFVAMHRAVLALAPVIR  
SVAVLAGEDLQMFNAFCLGASGAIASAHLHPQRFVALHRQV FALLPLIR  
KFSVFSGSDSLILDSLKAGSQGAVAATNFLEIIGISYENFSSIEELRR  
-----  
NISCWSGNDDECYVGRVHSGHGVISVASNIIPGFMRLMDKDDKQLGLMK  
NIACWSGNDDEAHDARLFGSHGVISVTSNLPNIMRQLMDKSTHTQPLMN  
NIACWSGNDDEAHDARVHKAHGVISVTSNLPGLFRQLMDTKSSQLPLMN  
NIACWSGNDDESHDARTHGAHGVISVSSNLMPELFRQLMDAPTSLOPLIN  
NVTCWTGNDDEVEHAREAGAVGVISVTSNLPPELMRELLFDGDRLLPLMG  
HITIWSGNDDECHDSRKYGATGVISVASNLPGLMHDLMYEGEKLFPLMK  
HITIWSGNDDECHDSRKYGATGVISVASNLPGLMRKLMYEGDKLLPLMK  
NVVVWSGNDDECHDSRDYGATGVISVTSNLPGLMRKLMFEGSKLLPLMA  
NIVVWSGNDQCHDSRDHGATGVISVTSNLPGLMRKLMFEGAKLLPLMD  
-----  
DFAILSGDDALTLPMIALGGHGIISVVSNLVPAAMKSLVNAANQLYSFIK  
DLAYSGDDALNLPWLAMGATGFSVISHVAANQLRELLSAFATVAPLCD  
DLAWYSGDDMLNPLAVGAVGVSVVGHVVTPELRAMVDHAKLLPVFT  
DFHLIYSGDDSLTLPALSIGAKGVVSVASHIIGPEMQMMAFRKLLIMK  
KFTVWSGNDSDTLPLMLAMSGYGVISVASHLVGNQIKDMITSFRLTPLIR  
NFALYSGDDALTLPLSLGGNGVSVASHFIPGEIQRMIEHFCRYMDLFE  
NFLIYAGDDFLTPLPLTVGGVGVSVASHLVGLMQEMIAAYVKLFLPK  
TLAIYSGDDALVPLMPLSVGAVGVSVASHLVAPNLKLI ESFTLQPLFK  
NFAIYSGDDSLTLPMLAVGAQGVSVASHLVGPQLQALIQAFHQLYPLFK  
SFVYICGDDSLTLPMLAVGATGVVSIASHLVGEPIQQMIRAFHLHLLPLFR  
DFLVIYSGDDLAVPTISLGAVGAVISVLSNTYPAKFSEMIKAARFTEMNP  
NFDVYSGDDGITFPLITLGAVGAVISVIGNAFPREFSRMTRLAKHKTFLFN  
DFMVWSGNDDRTFYLLCAGGDGVISVSNVAPKQMVLCAEYRKLRLPLMK  
DFAVLSGDDGMTLPLMLSVGGTGCISVSANIEPERTCAMVGAHELGLPLFR  
SFVVLSGEDGLTLP IISVGGSGVIVSVAANIVPDKMSGMVSAAFEIAELR  
NFSVLTGEDMLILPFMAMGGDGVISVAANQVPSAVKRLVEAATRYRRLFR  
SFTVLSGDDALTLPLAVGGVGLVSVASNQIPKELSEMVRANHFLLALMN  
SLTVLSGDDSLTLPMMSVGAEGVIVSVAANLVPVSLLEMVQT AHRLYSLCS  
KFIQVLSGEDSLTLP IISVGGSGVIVSVAANIVPDKMSGMVSAAFEIAELR  
DWVMSGDDPTALGYVAHGGHGVISVTSNVAPDACATFINACDRVLRLHK  
DMTVLSGDDNLTPLLAIGGVGVSVISNLPKALVQLVESFYDFIEVFA  
DFAIYSGDDTILPLSLGGQGVISVLANVCPQETHDLVAKFLGMDALIA  
SIQIFSGDDSLTLPPLMSIGAKGVVSVAAANLTPRKRVDLCKAMFYLKCK  
SIEVFSGDDSLTVPLMSVGAKGVVSVAAANLVPKMKADLCKSMAELYKCK  
NFVLSGDDASALDFMQLGGHGVISVTANVAARDMAQMKCLAQRLMPLHN  
DFLVYSGDDATAVELMLLGGKGNISVTANVAPRAMSDLCAAARDLMLPKH  
DFQVFSGDDPTAAALILLGARGNISVTANVAPRLMHLELCTAAARLARLNK  
NFVLSGDDSLTLPMMALGAKGVISVANNVMPREVKELIRAAYYLHDLFK  
SIDVFSGDDFITFPMMACGAKGVISVTANIMPKEVAALVDAFLKLLKISN

15605085\_Chlamydia\_tracho

WLNLSNPLGKALMAAQKMI ECDVRPPLSIR

|                                |                                   |
|--------------------------------|-----------------------------------|
| 88858626_Pseudoalteromonas_tun | SLFEVANPIPVKVLMHKQGRIFPLRPPLTHL   |
| 119468235_Alteromonadales_bact | SLFVANPIPVKVLMHQGRLLSSPLRPPLTHL   |
| 77359151_Pseudoalteromonas_hal | SLFTVANPIPVKVLMHLQGRLLTSSLRPPLTHL |
| 83765535_Aspergillus_oryzae    | WHAIKGGFVAVKLSALQSYRGYGAQPRRCPVEP |
| 71281575_Colwellia_psychr      | LDTVPKLVQCILKCEQLAGRGSELTRAPRMPL  |
| 31543060_Homo_sapien           | AVTRRFGIPGLKKIMDFWFGYGGPCRAPLQEL  |
| 119720569_Thermofilum_penden   | VYDATSFPTSVKTLKVMGAPVKPARTPLTPE   |
| 83770010_Aspergillus_oryzae    | FLESHNYAAAVKTGVELTGQPTGGLRKPFFALL |
| 33594549_Bordetella_pertus     | LLFAEPNPAPLKALLASQGRLLRNEMRAPMLPA |
| 84321353_Pseudomonas_aerugi    | AAFAEPNPAPVKAGLARQGLIGDELRAPLLGC  |
| 126701253_Clostridium_diffic   | ILKLGITIPVSMKKTIVLNGINVTARLPVTEP  |
| CDL00000863_Cyanophora_paradox | -----                             |
| 71279937_Colwellia_psychr      | WLFCEPNPIAINTAMIMTDAVNNFRLPYIAL   |
| 88857450_Pseudoalteromonas_tun | WLFCEPNPIAINTALMMTGAVKPVFRLPYVPL  |
| 119468748_Alteromonadales_bact | WLFCEPNPIAINTALMMTGAVNPVFRPLPYLPL |
| 77362300_Pseudoalteromonas_hal | WLFCEPNPIAINTALMMTEAVKPVFRLPYLPL  |
| 116057686_Ostreococcus_tauri]  | WLFREPNPIGVNTATAMLGVAKPVFRLPYVPY  |
| 115457444_Oryza_sativa         | WLCQPNPIALNTALAQLGVVRFVFRPLPYVPL  |
| 115460042_Oryza_sativa         | WLCQPNPIALNTALAQLGVARPVFRLPYVPL   |
| 15225477_Arabidopsis_thalia    | WLFHEPNPIGINTALAQLGVSFPVFRPLPYVPL |
| 30695296_Arabidopsis_thalia    | WLFQEPNPIGVNTALAQLGVARPVFRLPYVPL  |
| HVL00003027_Hartmanella_vermif | -----                             |
| 46446320_Candidatus_Protoc     | AAFIEETNPIPIKAALSLSKLPAGSCLPLCDL  |
| 118464138_Mycobacterium_avium  | AMARLGGVMTSKAGLRLQGDVGDPRLPQVPA   |
| 21224090_Streptomyces_coelic   | GMFRTQGVMTTKGALALQGLPAGPLRAPMVGL  |
| 15614962_Bacillus_halodu       | GLFTAPNPICVKAALQIKGFDTGGRPLVPP    |
| 88933169_Dehalococcoides_sp.   | SLFVVSNPPIPIKALNLYLGVVEVGLRPLMTEA |
| CM654_Cyanidioschyzon_merolae  | ALFVMANPIPAKALRLGLWVGPTRPLPLTDI   |
| 67923140_Crocospaera_watson    | VLFACTSNPLPIKAALNLQGDVGGVRLPLVSI  |
| 72383089_Prochlorococcus_marin | SLFATTNPIPVKAAALQIGWSVGPSPPLVSL   |
| 56752256_Synechococcus_elonga  | ALFLTTNPIPVRAMELLGWSIGLPLPLVPA    |
| 37520587_Gloeobacter_violac    | GLFWETNPIPVKLALALQGDVNHRLPLVAG    |
| 110637717_Cytophaga_hutchi     | LMYEEGNPVGVKSLELMGICSEVRLPLVKA    |
| 53713695_Bacteroides_fragil    | LLFVDGNPAGVKSMLNAMGMIEENKRLPLVPT  |
| 15644269_Thermotoga_mariti     | ALFVETNPIPVKALNLMGFIENELRPLVPA    |
| 55377124_Haloarcula_marism     | AMFVETNPIPVEAMRIRGYGPAHLRSPLTRL   |
| 20093258_Methanosarcina_acetiv | ALFLETNPIPAKKAELIGLASGHLRPLAPM    |
| 67918442_Chlorobium_limico     | LNFIENPVPVKYALALMGMIEEVYRLPLVPL   |
| 94969520_Acidobacteria_bacter  | ANFLESNPGPVKAVLAMMGRIEENYRLPMVPM  |
| 32472136_Rhodopirellula_baltic | KMLLATNPIPVKAAQMVGRDTGEMRLPMVPL   |
| 23501533_Brucella_suis         | ALFLEPNPSGPKYALSRLGRIENVLRSMPVTI  |
| 113932881_Caulobacter_sp.      | ALFLDASPSPTKFAMAHLGLCEATTRLPITPC  |
| 24216005_Leptospira_interr     | LAFMETNPIPKAAMCWFHGCGPEIRLPLTPL   |
| 126700845_Clostridium_diffic   | ALFIEVNPIPVKTAMNLLGFNVGDLRPLAEM   |
| GTL00002039_Guillardia_theta   | AMFCETNPIPCKAAGAMMKWKNNTRLPMTPM   |
| ELL00008008_Euglena_gracilis   | AMFCETNPIPCK-----                 |
| 16130403_Escherichia_coli      | KLFVEPNPIPVKWACKELGLVATDLRPLMPTPI |
| 84316486_Pseudomonas_aerugi    | ALFIESNPIPVKWALHEMGLIPEGIRLPLTWL  |
| 33592660_Bordetella_pertus     | ALFIEANPIPVKWALAQMGHTALGYRLPMVEL  |
| 15606400_Aquifex_aeolic        | VLFIETNPIPVKTACWMLGMCEKEFRLPLTEM  |
| 88935908_Geobacter_uraniu      | AMFIESNPPVKTAVALMGKCSAEVRLPLAPL   |

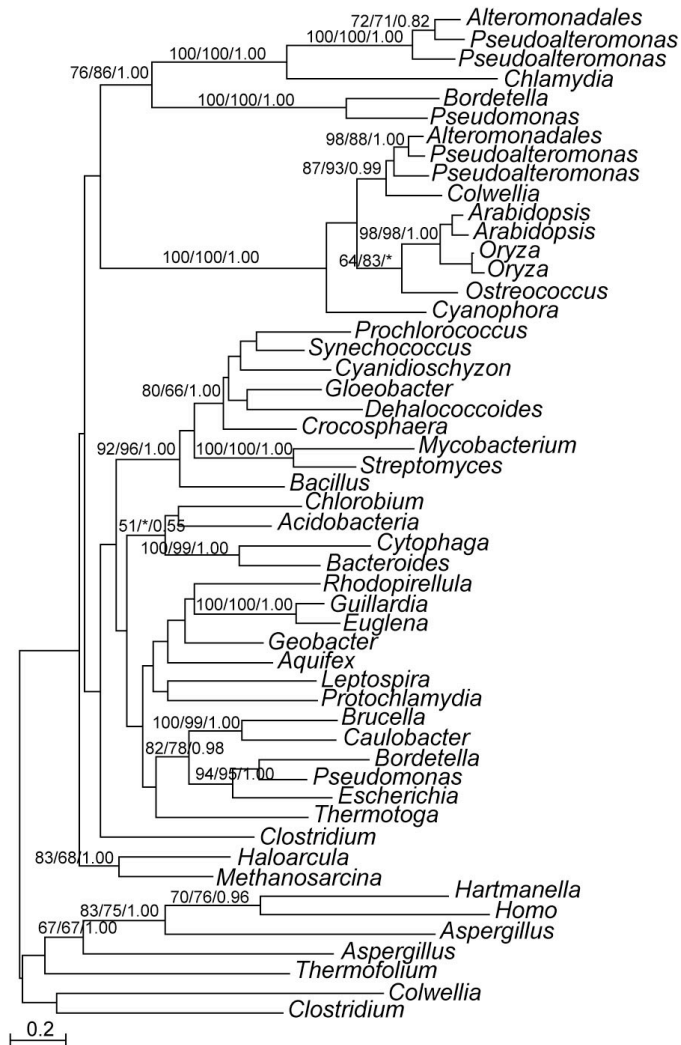

**Figure 3.** Molecular phylogeny of dihydrodipicolinate synthase (*dapA*). The red algal *Cyanidioschyzon* sequence forms a group with cyanobacterial and *Dehalococcoides* homologs with strong support whereas green algal and glaucophyte sequences form another strongly supported group with gamma-proteobacterial homologs. This could be explained by an HGT from gamma-proteobacteria and subsequent gene losses among primary photosynthetic eukaryotes. See text for explanations. Sequences of *Cyanophora*, *Guillardia*, *Hartmanella*, and *Euglena* were obtained from TBestDB. P-value = 0.199 from the AU test for the presented tree.

AU tests were also performed on alternative topologies, including (A) monophyly of all eukaryotic sequences except *Cyanidioschyzon* that appears to be plastid-derived, (B) monophyly of *Cyanidioschyzon* and cyanobacterial sequences, and (C) monophyly of all plastid-containing eukaryotic and cyanobacterial sequences. P-values < 0.001 from AU test for topologies A and C, suggesting that green plant and glaucophyte sequences are unlikely of the same origin (mitochondrial or plastidic origin) with other eukaryotic sequences. P-value = 0.801 from AU test for topology B, confirming the likely plastidic origin of the *Cyanidioschyzon* sequence.

#### 4. ThiC family protein (D)

CLUSTAL X (1.83.1) multiple sequence alignment

```
15922177_Sulfolobus_tokoda      MAIIDDARKGIITDEMCKISLIEKISPEKVRKRIVEGKIMLIRNEKYSKK
18311872_Pyrobaculum_aeroph    NTIIRRAREGRIDDEMRKIAEAEVGSPEKLRDRIAKQVVYIRNVKWKSEK
15789892_Halobacterium_sp.     STQLQHARDGTVTDAMRRVADREGRDPEVVRVREAVADGHAVIPANHHHALD
34541691_Porphyrromonas_gingiv FTQLEYARAGVITDEMIYVATRENVTPFVRAEIAAGRAIIPANINHELE
48764428_Rhodospirillum_rubrum VTQMHYARQGIIVTPEMEFVAIRENITPEYVRSEVARGRAIIPLNINHEAE
71836834_Pelobacter_propio     VTQMHYARKGIITPEMEYVAIRENVTPEFVRAEIAKGRAIIPANINHELE
67938921_Chlorobium_phaeob     RTQLAWARAGIVTPEMRFAAREGVEPELVRAEVAAGRAVIPANHNHELE
54027290_Nocardia_farcin      HSQMYFARKGIIITEEMRYAAFRENMEPEFVRSIACGRAIIPSNRNHELE
45658515_Leptospira_interr    ITQMQAARRGEITPEMEFVALRENITPEFVRAEVARGRAVIPANVNHELE
66797754_Deinococcus_geothe   VSQMHYARKGIITPEMEYVALRESITPEFVRAEVARGRAIIPANINHELE
73539911_Ralstonia_eutrop     WSQMHFARRGIIITEEMRYCAIRENVEPEFVRAEIAAGRAIIPANIHHELE
149920854_Plesiocystis_pacific VTQMHYARRGIIITPEMEFVAIRENITPEFVREEIARGRAIIPANINHESE
21232748_Xanthomonas_campes   VTQLAYARAGIVTPEMEFIAIRENVTPEFVRQEVAAAGRAIIPANINHEAE
15141415_Sinorhizobium_melilo VTQLAYARAGIITPEMEFIAIRENVTAEFVRQEVASGRAIIPANINHELE
17936444_Agrobacterium_tumefa FTQLYYARKGIIITEEMLFAAVRENVDPEFVRQEVAAAGRAIIPSNKKAELE
CM937_Cyanidioschyzon_merolae VSQMHYARQGIITAEEMEYVAIRENITPEFVRQEIARGRAIIPANINHEVE
26991600_Pseudomonas_putida   VTQLHYARQGIITPEMEFIAIRENITAEFVRDEVAAGRAIIPANINHESE
26250765_Escherichia_coli     VSQMHYARKGIITPEMEYIAIRENITPEFVREEVARGRAIIPSNINHESE
48855688_Cytophaga_hutchi    VTQMHYAKGIIITPEMEFIAIREHVSPEFVRDEVASGRAIIPSNINHESE
16077944_Bacillus_subtil      VSQMHYARKGIITPEMEYVAERENITPEFVRDEVARGRAIIPNNINHETE
61100363_Erythrobacter_litora VTQMALARAGIITSEEMRFAAREGLDPEFVRSELARGRAIIPANKCHELE
157028_Chlamydomonas          YTQMYAKQGIITTEMLYCATREKLDPEFVRSEVARGRAIIPSNKKHELE
22136156_Arabidopsis_thalia   -----
CP000022869_Cyanophora_paradox MTQLLSARAGEITPEMEYVAKREDLPVELIRDEVASGRMVIPANKVHALE
32445237_Rhodopirellula_baltic RTQMHYARKGIIITEEMHYIAKRESISPELIRSEVARGRMIIPANVNHNLE
67930575_Solibacter_usitat    KTQMHLLAROGIITTEEMEYVAKREGLHPEFVRQEVARGRMIIPANINHHLE
15606443_Aquifex_aeolic      VSQMYFARREVIITEEMSFVAKENLPESLIMEEVARGRMIIPANINHNLE
33241220_Prochlorococcus_marin VSQMHYARKGVIITEEMDYVAKRENLPVELIKDEVARGRMIIPANINHNLE
16331858_Synechocystis_sp.    VSQMHYGRQGIITTEEMNFVAQRENLPaelIRAEEVARGRMIIPANINHNLE
71675053_Trichodesmium_erythr VTQMHYARQGIITTEEMQYVAQRENLPADLIREEVARGRMIIPANINHNLE
45507375_Anabaena_variab     MTQMEMARKGVVSDMKKVAEYEGVDVEIVRQKLAEGRAVLPKNKLHIER
4981317_Thermotoga_mariti    MTQLEAARKGKIITEEMAYVAEKEGVSPFVREGVAAGRIVIPRNPNHLTD
46198627_Thermus_thermo      LTQIESARQGIITPQMEAVAAAEELTPAYILQMVAEKIVIPWNHNRPKP
71839731_Pelobacter_propio    MTIVEDAKKGIITTEEMKIVAKDEGLDPEFIRRGIAAGRIVIPTSPYRQVK
20093117_Methanosarcina_acetiv MTLMEDAKKGIIVTPSIEAVAKAEGIDAETVRSVAKGLIAIPKNNRRETL
20090641_Methanosarcina_acetiv MTQLEEARKGVTTEEMKFAAREGIDAELKLRNVAKGYTVIPRNVHRWVK
57158692_Thermococcus_kodaka  MTQMEEAARGVITEEMKIIAKIEKIDPEKLRRSVAKGHTVIVRNVNHWVT
18977903_Pyrococcus_furios    MTQLEYARRGVIITEKMKIAAQSEGVAPEFIRDGIAAGTIVICHNKHNGT
71838180_Pelobacter_propio   KTQMEAAKKGILTKEMKSIAESESIDEKVLMERVASGEITIPANKKHSLL
19712998_Fusobacterium_nuclea TTQMDAAKKGIIITDEMRIAEEKGVHVEKLELRELVASGKVVIPANKNHKLE
67875148_Clostridium_thermo

15922177_Sulfolobus_tokoda      IVAIGKGLTTKVNINIGTSSEVVNLDMELEKVKIANKWG-DTLMDLSTGG
18311872_Pyrobaculum_aeroph    VVAIGKGLSTKINVNLTGSTEVVDLDSSELKKVEVANWKWG-DTLMDLSTVGG
15789892_Halobacterium_sp.     PMIIGRDFATKVNANIGNSDITGDIIDDELEKLHTAVHYGADTVMDLSTGE
34541691_Porphyrromonas_gingiv PMIIGRNFLVKINANIGNSPISSTIEEEVEKAVWAIIRWGADTVMDLSTGD
48764428_Rhodospirillum_rubrum PTIIGRNFLVKVNANIGNSALGSSIEDEVAKLVWAIIRWGADTVMDLSTGK
71836834_Pelobacter_propio     PMIIGRNFLVKVNANIGNSALASSVMDEVEKMIWAIIRWGADTVMDLSTGA
67938921_Chlorobium_phaeob     PMAIGRNFRVKINANIGNSALASSISSEVEKSVWACRWGADTVMDLSTGK
54027290_Nocardia_farcin      PTIIGKFLVKINANIGNSAVSSSIAEEVEKMWATRWGADTIMDLSTGK
45658515_Leptospira_interr    PMVIGKNFLVKINANIGNSTFSSSIEEEVEKLVHWAIKWGADTVMDLSTGK
66797754_Deinococcus_geothe   PTIIGRNFRVKVNANLGTSTVTSSEIEEEVEKMWATRWGADTVMDLSTGR
73539911_Ralstonia_eutrop     PMAIGRNFRVKINANIGNSAVTSSLAEEVEKMWVSIIRWGADTIMDLSTGK
149920854_Plesiocystis_pacific PMIIGRNFLVKINANIGNSAVSSSIEEEVEKLVQWSTRWGADTVMDLSTGK
21232748_Xanthomonas_campes   PMIIGRNFLTKNANIGNSAVSSGIAEEVEKLVWSIRWGGDTVMDLSTGK
15141415_Sinorhizobium_melilo PMIIGRNFLVKINANIGNSAVTSSMAEEVEKMWATRWGADTVMDLSTGR
17936444_Agrobacterium_tumefa PMIIGRNFRVKINANIGNSAVTSSMAEEVEKMWVSIIRWGADTVMDLSTGR
CM937_Cyanidioschyzon_merolae PMVVGPNFSVKVNANFGNSAVASNIEDEVAKLQWVSLWGADTVMDLSTGE
26991600_Pseudomonas_putida   PMIIGRNFLVKINGNIGNSALGSSIEEEVAKLTWGIIRWGSPTVMDLSTGK
26250765_Escherichia_coli     PMIIGRNFLVKVNANIGNSAVTSSIEEEVEKLVWSTRWGADTVMDLSTGR
48855688_Cytophaga_hutchi    PMIIGRNFLVKINTNIGNSAVTSSIEEEVEKAVWSCRWGGDTVMDLSTGK
16077944_Bacillus_subtil      PMIIGRNFRVKINANIGNSAVTSSIEEEVEKMTWAIIRWGADTMDLSTGK
61100363_Erythrobacter_litora PMAIGRNFLVKINANIGNSAVASDVAAEVDKMWVSIIRWGADTVMDLSTGR
```

157028\_Chlamydomonas  
22136156\_Arabidopsis\_thalia  
CP000022869\_Cyanophora\_paradox  
32445237\_Rhodospirillum\_baltic  
67930575\_Solibacter\_usitat  
15606443\_Aquifex\_aeolic  
33241220\_Prochlorococcus\_marin  
16331858\_Synechocystis\_sp.  
71675053\_Trichodesmium\_erythr  
45507375\_Anabaena\_variab  
4981317\_Thermotoga\_mariti  
46198627\_Thermus\_thermo  
71839731\_Pelobacter\_propio  
20093117\_Methanosarcina\_acetiv  
20090641\_Methanosarcina\_acetiv  
57158692\_Thermococcus\_kodaka  
18977903\_Pyrococcus\_furios  
71838180\_Pelobacter\_propio  
19712998\_Fusobacterium\_nuclea  
67875148\_Clostridium\_thermo

PCVIGRNFMTKVNNSFGNSAVTSSIEEEVEKQWSTIWGADTVMDLSTGH  
PMIVGRKFLVKVNNANIGNSAVASSIEEEVYKQWATMVGADTMDLSTGR  
-----  
PMAIGIAACKKINANIGNSAVTSNVGEELEKLTAVHFGADTVMDLSTGK  
PMCIGVASKCKKINSNIGNSSVSDIAGELEKLEYSVKYGADTVMDLSTGG  
PMCIGINSKVKVNNANIGNSGLASDIPTEVEKAKVAIKYGADTMDLSTGE  
PMAIGIASSCKVNNANIGASPNASDVNEELKKLHLAVKYGADTVMDLSTGG  
PMAIGIASKCKVNNANIGASPNSSNIDEVEKLLSVKYGADTVMDLSTGG  
PMCIGIASRCKVNNANIGASPNSTSDITKEVDKLLKLSIKYGADTVMDLSTGG  
PMAIGIASKCKVNNANIGASPNSSNLQEEVDKLNLAVKYGADTVMDLSTGG  
PMIVGEGFSVKVNNANIGTSQGFSSLEEEKEKARVAIEYGADSLMVLSTWG  
FKGIGEGLSVKVNNANLGTSDYDYNVEEVEKARVAIQYGADTVMDLSTGG  
VCGIGKGLRTRKVNASIGTSSDIDVYAAEVRKAKVAQEAQADTLMELSVGG  
ICGLGELRTRKVNASIGVSSDIDVNVMEVQKAAIAEKAGADTLMELGTGG  
PIGIGKYMSTKINANVGTSRDCIDDAEVEKAKAAEAFGAHVMMDLSTGG  
PVAVGAGVRVKVNNANIGTSRDIIVDKAEIEKAKVAVKYGADTMDLSTGG  
PVAVGQGVVRVKVNNANIGTSRDIIVNVEEIEKAKIAVKYGADTMDLSTGG  
PLPVGTLRLTKINANIGSSDDTDMQKELEKARVAVKYGADTMDLSTGG  
AKGVGTGLSTKINVNIGISKDCPNVKELEKVKVAIDMKVDAIMDLSSFG  
PQIGIGELRTRKINVNIGISKDCCNFEMELEKAKKAIELKAEAIMDLSSYG

15922177\_Sulfolobus\_tokoda  
18311872\_Pyrobaculum\_aeroph  
15789892\_Halobacterium\_sp.  
34541691\_Porphyrromonas\_gingiv  
48764428\_Rhodospirillum\_rubrum  
71836834\_Pelobacter\_propio  
67938921\_Chlorobium\_phaeob  
54027290\_Nocardia\_farcin  
45658515\_Leptospira\_interr  
66797754\_Deinococcus\_geothe  
73539911\_Ralstonia\_eutrop  
149920854\_Plesiocystis\_pacific  
21232748\_Xanthomonas\_campes  
15141415\_Sinorhizobium\_melilo  
17936444\_Agrobacterium\_tumefa  
CM937\_Cyanidioschyzon\_merolae  
26991600\_Pseudomonas\_putida  
26250765\_Escherichia\_coli  
48855688\_Cytophaga\_hutchi  
16077944\_Bacillus\_subtil  
61100363\_Erythrobacter\_litora  
157028\_Chlamydomonas  
22136156\_Arabidopsis\_thalia  
CP000022869\_Cyanophora\_paradox  
32445237\_Rhodospirillum\_baltic  
67930575\_Solibacter\_usitat  
15606443\_Aquifex\_aeolic  
33241220\_Prochlorococcus\_marin  
16331858\_Synechocystis\_sp.  
71675053\_Trichodesmium\_erythr  
45507375\_Anabaena\_variab  
4981317\_Thermotoga\_mariti  
46198627\_Thermus\_thermo  
71839731\_Pelobacter\_propio  
20093117\_Methanosarcina\_acetiv  
20090641\_Methanosarcina\_acetiv  
57158692\_Thermococcus\_kodaka  
18977903\_Pyrococcus\_furios  
71838180\_Pelobacter\_propio  
19712998\_Fusobacterium\_nuclea  
67875148\_Clostridium\_thermo

DLDLIRREI IKHSELVPGTVPVYQVFI EHKSGGAYFTEDDLLNTIEKHLK  
DLDAIRRAVSIKSKLPGTVPVYQAFIEKRSGGAYFTIDDLFNTIERQLK  
NLDGIRATANIDNSPVPVGTVPVIEAVTRVE-DVTDITPDLIDVVEKQAK  
HIHETREWIIRNSPVPVIGTVPLYQTELEKVDVTKLNWEIFRDTLIEQAE  
AIHATREWILRNSPVPVIGTVPLYQALEKVGGDATRLDWAVFEDTLIEQCE  
HIHETREWILRNSPVPVIGTVPIYQALEKVAGVAEDLSWDVFRDTLIEQAE  
NIHQTREWILRNSPVPVIGTVPIYQALEKVGKAEELNWNIRYRDTLIEQAE  
NIHETREWILRNSPVPVIGTVPIYQALEKVNDDPAALTWEIYRDTLIEQAE  
NIHETREWILRNSPVPVIGTVPIYQALEKVKGTENLNIIQIFLETLEEQAE  
HIHQTREWILRNSPVPVIGTVPIYQALEKVGVAEELTWEVYRDTLIEQAE  
HIHETREWILRNSPVPVIGTVPIYQALDKTGGIAEDLTWEMFRDTLIEQAE  
NIHETREWIMRNAPVPIGTVPVPIYQALEKVGKAEEDLNIDIFMETLEEQAQ  
HIHETRDWIIRNSPVPVIGTVPIYQALEKVDGRAEELTWEIFRDTLIEQAE  
NIHNIREWIIIRNSPVPVIGTVPLYQALEKVNIAEDLSWEVFRDTLIEQAE  
NIHNIREWIIIRNSPVPVIGTVPLYQALEKVNIAEDLNWEVFRDTLIEQAE  
HIPLVRNWILRNSPVPVIGTVPIYEALEDKVGVDVEDLNWEVFRDTLIEQAE  
HIHETREWIIRNSPVPVIGTVPIYQALEKVNVAEDLTWELFRDTLIEQAE  
YIHETREWILRNSPVPVIGTVPIYQALEKVNIAEDLTWELFRDTLIEQAE  
NIHETREWIIRNSPVPVIGTVPIYQALEKVNKAEDLTWEIFRDTLIEQAE  
DIHTTREWIIRNSPVPVIGTVPIYQALEKVNVAEDLTWEIYRDTLIEQAE  
NIHDTREWIIRNSPVPVIGTVPIYQALEKVGIAEDLTWDFRDTLIEQAE  
NIFETREWIMRNAPVPGTVPIYEALEADQVQEGITWELFRQVLLDQAE  
HIHETREWILRNSAVPVGTVPIYQALEKVDGIAENLNWEVFRDTLIEQAE  
-----NSPVPVGTVPVPIYQALEKVGIAEDLTWEIFRETLEEQAE  
DIDNIRRQIIDKSPVPVIGTVPIYQMLEELGGNIEDMNAQHFLDMVEHQAK  
DIPAIRKAIIGASPIPIGTVPVPIYEALESVRV-RVEDLSAQVMLEVEEQAE  
AIKETRAIINVSTVPVGTVPVPIYEAWKIAKGNVKELTVDLIDLVIEQAR  
NLDEVRTAIIQASVPVIGTVPVYQALESVHGSIEKLSSEDFLHIIKHCQ  
DLVDVIRTAIINASVPVIGTVPIYQALESVHGSINLTPDDFLHIIKHAQ  
NLDEIRTAIINASVPVIGTVPVYQAVESVHGRIENLTADDLHVIKHAQ  
NLDEIRTAIINASVPVIGTVPVYQALESVHGTIENLTPEDFLHIIKHAQ  
DLREIRRAIVEMSPVPGSVPIYDSAVRMKKNVDFSEKDFDMVIAHAE  
DLKAIKRILEVATVPLGTVPVPIYEAERFRNRNFFDMSADELFQVIEEHKQ  
DLDRVREIVIAAVDLVPGNVPLYQAFCEKYGNPNKLEDEMLFDLIEQCA  
DFLGIRKKVIDSISLSVGSVPLYQAFIEKYGSIVHMTDEDELFNATEAQAK  
DLNEIRTRILKAVNIPVGTVPVPIYQAAA-SQKVVEMTSDDMFNAVRKHAE  
DLDEIRKTIHMAVDVPGTVPIYQAAEEKKAIIEMSEDMWRAVEKHFK  
DLDFIRRKIMKAVNVPGTVPIYQAAEERKAIIEMTEDDMWRAVEKHFK  
PVDEIRRAVVAETNACIGSVPLYQAALDKKKAIVDMTVDDIFAGIIKHAE  
KTEEFRRKLIITMSTAMVGTVPVYDAIGFYDKELKDIKAEELFVVRKHAE  
KTREFRRLKLVEMSPVMIGTVPVYDAVGFYEKDLKDISAEAEFFVEVKEHAE  
:\*.\*\*.\*:

15922177\_Sulfolobus\_tokoda  
18311872\_Pyrobaculum\_aeroph  
15789892\_Halobacterium\_sp.  
34541691\_Porphyrromonas\_gingiv  
48764428\_Rhodospirillum\_rubrum  
71836834\_Pelobacter\_propio  
67938921\_Chlorobium\_phaeob  
54027290\_Nocardia\_farcin

DGVAFMTIHAGLTKDLAIRALKRIPIVSRGGMIAGWMIHNNSNPNYRK  
DGVAFMTIHAAVTKEAAIRVLKRVIPVSRGGMIIGWMLHNDENPYLT  
QGVDYMTLHAGVLAHPLTDRRTTGISVSRGGSILSQWMTHEGQNPVLYT  
QGVDYFTIHAGLRWHVPLTLRRLTGISVSRGGSIIANWCTTHKRESPIYE  
QGVDYFTIHAGVRLAHLPLTASRTTGISVSRGGSILAKWCLSHHRESFLYE  
QGVDYFTIHAGVRLHPLTASRTTGISVSRGGSIMAKWCHHRESFLYT  
QGVDYFTIHAGVRLHPLTASRTTGISVSRGGSIIAKWCHHRESFLYS  
QGVDYMTVHAGVLLRYVPLTAKRVTVGISVSRGGSIIAAWCLAHHRESFLYT





71838180\_Pelobacter\_propio  
19712998\_Fusobacterium\_nuclea  
67875148\_Clostridium\_thermo

HFDKLLEITKEYDMTSLGLDGFDPGLADATDRAQIHELILLGELTQRAQ  
NFDKLLDICEEYDMTISLGDALRPGCLNDATDACQIKELITLGLTKRAW  
QYDRLLQIFEKYDVTISLGDALRPGSINDSTASQIQELVLGLTKRAW  
: : : \* : : \* \* \* : \* : \* : \* :

15922177\_Sulfolobus\_tokoda  
18311872\_Pyrobaculum\_aeroph  
15789892\_Halobacterium\_sp.  
34541691\_Porphyrromonas\_gingiv  
48764428\_Rhodospirillum\_rubrum  
71836834\_Pelobacter\_propio  
67938921\_Chlorobium\_phaeob  
54027290\_Nocardia\_farcin  
45658515\_Leptospira\_interr  
66797754\_Deinococcus\_geothe  
73539911\_Ralstonia\_eutrop  
149920854\_Plesiocystis\_pacific  
21232748\_Xanthomonas\_campes  
15141415\_Sinorhizobium\_melilo  
17936444\_Agrobacterium\_tumefa  
CM937\_Cyanidioschyzon\_merolae  
26991600\_Pseudomonas\_putida  
26250765\_Escherichia\_coli  
48855688\_Cytophaga\_hutchi  
16077944\_Bacillus\_subtil  
61100363\_Erythrobacter\_litora  
157028\_Chlamydomonas  
22136156\_Arabidopsis\_thalia  
CPO00022869\_Cyanophora\_paradox  
32445237\_Rhodopirellula\_baltic  
67930575\_Solibacter\_usitat  
15606443\_Aquifex\_aeolic  
33241220\_Prochlorococcus\_marin  
16331858\_Synechocystis\_sp.  
71675053\_Trichodesmium\_erythr  
45507375\_Anabaena\_variab  
4981317\_Thermotoga\_mariti  
46198627\_Thermus\_thermo  
71839731\_Pelobacter\_propio  
20093117\_Methanosarcina\_acetiv  
20090641\_Methanosarcina\_acetiv  
57158692\_Thermococcus\_kodaka  
18977903\_Pyrococcus\_furios  
71838180\_Pelobacter\_propio  
19712998\_Fusobacterium\_nuclea  
67875148\_Clostridium\_thermo

EKGVQVMIEGPGHVPLNEIAWDVVKLMMKLTGGVPPYYVLGGLPIDVGAPYD  
KAGVQVMIEGPGHVPLNDVIWTIKLEKRLTGGVPPYYVLGGLPTDVAAPYD  
DHGVOAMVEGPGHVPMQDQIRANVDROQEVDCGAPFFYVLGGLVTDIAPGYD  
KYNVQTIIEGPGHVPMHKIKRENMEIQLEACHGAPFFYTLGGLVSDVASGYD  
EHGCQVMVEGPGHVPMHKIKANMDRQLATCGEAPFFYTLGGLTDDIAPGHD  
KHDVQTMIEGPGHVPLHLIRENMEIQLEACHGAPFFYTLGGLVTDVAPGYD  
KYDVQVMIEGPGHVPLNVEENMRKQLEYCHEAPFFYTLGGLVTDIAAGYD  
SHGVQVMIEGPGHVPMHKIKENVRLEELCEAPFFYTLGGLATDIAPAYD  
KEDIQVMIEGPGHVPMNLIKENVDLQTKICQEAPFFYTLGPIVTDIAPGYD  
EHGVQTMIEGPGHVPMQLIRENMTROLQVCEAPFFYTLGGLTDDIAPGYD  
KHDVQVMIEGPGHVPLQRIQANMDEELKHCYEAPFFYTLGGLVTDIAPGYD  
KHDVQVMIEGPGHVPMHKIKENMTEQLEHCEAPFFYTLGGLTDDIAPGYD  
KHDVQVMIEGPGHVPMQLIKENMDKQLEACGEAPFFYTLGGLTDDIAPGYD  
AKDCQVMIEGPGHVPMHKIKENMDKQLAVCGEAPFFYTLGGLTDDIAPGYD  
ARDCQVMIEGPGHVPMHKIKENMDKQLKTCGEAPFFYTLGGLTDDIAPGYD  
AFDVQVMNEGPGHVPLHKIPENMEKQKKWSSAPFFYTLGGLVIDHAAGR  
KHDVQVMIEGPGHVPMQLIKENMDKQLECCDEAPFFYTLGGLTDDIAPGYD  
EYDVQVMIEGPGHVPMQIRNMTEELEHCEAPFFYTLGGLTDDIAPGYD  
KHDVQVMVEGPGHVPMHKIKENMDKQLEKCEAPFFYTLGGLTDDIAPGYD  
KHDVQVMIEGPGHVPMHKIKENVDKQMDICKEAPFFYTLGGLTDDIAPGYD  
EQDVQVMIEGPGHVPMHKIKENMDKQLEACGEAPFFYTLGGLTDDIAPGYD  
EKNVQVMNEGPGHVPLNKIPENMAKQLEWCSEAPFFYTLGGLTDDIAPGYD  
EKDVQVMNEGPGHVPMHKIPENMQKQLEWCNEAPFFYTLGGLTDDIAPGYD  
EKDVQVMNEGPGHIIPLHKVQENVDKQMEWCHEAPFFYTLGGLTDDIAPGYD  
EKGTQVMVEGPGHIIPLDQIQMNIERQIEVCHGAPFFYTLGGLTDDIAPGYD  
KHDVQTMIEGPGHIIPLDQIQMNIERQIEVCHGAPFFYTLGGLTDDIAPGYD  
KHDVQAMVEGPGHVPLHQVEFNMKIQQEWCEAPFFYVLGGLVLDVAPGYD  
KHDVQVMVEGPGHVPMQDQIEFNVRKQMEDCLEAPFFYVLGGLVTDIAPGYD  
EHDVQVMVEGPGHVPIIDQIEFNVRKQMECEAPFFYVLGGLVTDIAPGYD  
GHEVQVMVEGPGHVPMQDQIEFNVRKQMECEAPFFYVLGGLVTDIAPGYD  
EHDVQVMVEGPGHVPMQDQIEFNVRKQMECEAPFFYVLGGLVTDIAPGYD  
EKGVOVMIEGPGHVPLNEIEMNVRMLKIKGAPIFLLGGLPTDRMGYD  
RAGVQAMVEGPGHIIPLNEVAANVQIQKLTGHAPFFYILGMLPVDTAAGFD  
DMGCQMLVEGPGHVPLDEIEGNIQLQKRMSGDAPPYMLGPIATDVAPGYD  
QQGLQVIVEGPGHVPLDQIATNVKLMKEMSGHKPFYMLGGLVTDIAPGYD  
AANVQTFVEGPGHVPLNEIELSVRGMKELCDGAPLYLLGGLVTDIAPGFD  
EAGVQTMVEGPGHVPIIDQIAAQVKLAKVATDNAPFFYVLGGLVTDIIFPGYD  
EFGVQTMVEGPGHVPIIDQIPTHIRLMKIASDNAPVYVLGGLVTDIIFPGYD  
AAGVQVMIEGPGHVPLQIQANILLQKRLCHGAPFFYVLGGLVTDIAPGYD  
ERNVQIIEGPGHMAIDEIEANVKLEKKLCHNAPFFYVLGGLVTDIAPGYD  
EKNVQVMIEGPGHMAINEIAPNMVLEKKLCHGAPFFYVLGGLVTDIAPGYD  
\* : \* \* \* \* : : : \* : \* \* : \* \*

15922177\_Sulfolobus\_tokoda  
18311872\_Pyrobaculum\_aeroph  
15789892\_Halobacterium\_sp.  
34541691\_Porphyrromonas\_gingiv  
48764428\_Rhodospirillum\_rubrum  
71836834\_Pelobacter\_propio  
67938921\_Chlorobium\_phaeob  
54027290\_Nocardia\_farcin  
45658515\_Leptospira\_interr  
66797754\_Deinococcus\_geothe  
73539911\_Ralstonia\_eutrop  
149920854\_Plesiocystis\_pacific  
21232748\_Xanthomonas\_campes  
15141415\_Sinorhizobium\_melilo  
17936444\_Agrobacterium\_tumefa  
CM937\_Cyanidioschyzon\_merolae  
26991600\_Pseudomonas\_putida  
26250765\_Escherichia\_coli  
48855688\_Cytophaga\_hutchi  
16077944\_Bacillus\_subtil  
61100363\_Erythrobacter\_litora  
157028\_Chlamydomonas  
22136156\_Arabidopsis\_thalia  
CPO00022869\_Cyanophora\_paradox  
32445237\_Rhodopirellula\_baltic

HIASAIGAAIASASGADLLCYLTPAEHLSLPTVEQVEEGAIAYRIAHAHAG  
HIASAVGAALAAAAGADLLCYITPAEHLSTPTVEQVEGAIAYRIAHAHIG  
HITSAIGATEAARAGAAAMLCYVTPKEHLGLPDAEDVDRGMAYRIAHAHAG  
HITSAIGAAQIGWFGTAMLCYVTPKEHLGLPNREDVREGVVTYRKLAAHAA  
HITSAIGAAIGWFGTAMLCYVTPKEHLGLPDRADRVKAGVIAKYIAHAAHAA  
HITSAIGGAMIGWLGTSMLCYVTPKEHLGLPDKDDVKEGVITFKIAHAAHAA  
HVNSAIGGTLASLGCAMLCYVTPKEHLGLPDKNDVREGVIVHKLAAHAAHAA  
HITSAIGAAIIAQAGTAMLCYVTPKEHLGLPNRDDVKTGVITKYIAHAAHAA  
HITSAIGAAAMIGWGTAMLCYVTPKEHLGLPNKEDVKQGVIAKYIAHAAHAA  
HITSAIGAAQIAWYGTAMLCYVTPKEHLGLPDRQDVRDGVIAKYIAHAAHAA  
HITSAIGAAAMIGWGTAMLCYVTPKEHLGLPDKEDVREGIITYKYIAHAAHAA  
HITSAIGAAAMIGSFGCAMLGYVTPKEHLGLPNREDVKAGVIAKYIAHAAHAA  
HITSAIGAAAMIGWFGTAMLCYVTPKEHLGLPNRQDVRDGMAYKYIAHAAHAA  
HITSAIGAAAMIGWFGTAMLCYVTPKEHLGLPDRNDVKTGVITYKYIAHAAHAA  
HITSAIGAAAMIGWFGTAMLCYVTPKEHLGLPDRNDVKTGVITYKYIAHAAHAA  
HITSAIGAAAMIGWFGTAMLCYVTPKEHLGLPNKDDVKTGVITYKYIAHAAHAA  
HITSAIGAAAMIGWGTAMLCYVTPKEHLGLPNRDDVREGVITYKYIAHAAHAA  
HITSAIGAAQIGWYGTAMLCYVTPKEHLGLPDRDDVKTGVITYKYIAHAAHAA  
HITSAIGAAANTIGALGTALLCYVTPKEHLGLPNRDDVKTGVITYKYIAHAAHAA  
HITSAIGAAANTIGALGTALLCYVTPKEHLGLPNRDDVKTGVITYKYIAHAAHAA  
HITSAIGAAAMIGGTTALLCYV-----  
HITSAIGAAANTIGALGTALLCYVTPKEHLGLPNREDVKTGVITYKYIAHAAHAA



|                                 |                   |
|---------------------------------|-------------------|
| 21232748_Xanthomonas_campes     | HSMCGHFCSMKITQDV  |
| 15141415_Sinorhizobium_melilo   | HSMCGKFCSMRISHDI  |
| 17936444_Agrobacterium_tumefa   | HSMCGKFCSMRISHDI  |
| CM937_Cyanidioschyzon_merolae   | ASMCSDFCSMRITQDI  |
| 26991600_Pseudomonas_putida     | ASMCGKFCSMKITQEV  |
| 26250765_Escherichia_coli       | GSMCGKFCSMKISQEV  |
| 48855688_Cytophaga_hutchi       | ASMCGHFCSMKITQEV  |
| 16077944_Bacillus_subtil        | ASMCGKFCSMRISQDI  |
| 61100363_Erythrobacter_litora   | ASMCGKFCSMKITQEV  |
| 157028_Chlamydomonas            | ASMCGKFCSMNITQEL  |
| 22136156_Arabidopsis_thalia     | ASMCGKFCSMKITEDI  |
| CPO00022869_Cyanophora_paradox  | -----             |
| 32445237_Rhodospirellula_baltic | FSMCGKYCSMKITEDI  |
| 67930575_Solibacter_usitat      | FSMCGKFCSMNISAKV  |
| 15606443_Aquifex_aeolic         | YSMCGEFCSYKISQKV  |
| 33241220_Prochlorococcus_marin  | YSMCGKHCPMQTKITD  |
| 16331858_Synechocystis_sp.      | YSMCGKFCSMPQTKVDA |
| 71675053_Trichodesmium_erythr   | YSMCGKFCSMPQTKVDA |
| 45507375_Anabaena_variab        | YSMCGKFCSMPQTKVDA |
| 4981317_Thermotoga_mariti       | GSMCGPFCAIKIAEEF  |
| 46198627_Thermus_thermo         | ASMCGPFCSMNLVEAV  |
| 71839731_Pelobacter_propio      | NTMCGDFCASRGAGRL  |
| 20093117_Methanosarcina_acetiv  | DTMCGNFCALKIVNQN  |
| 20090641_Methanosarcina_acetiv  | ASMCGELCAVKIVKEA  |
| 57158692_Thermococcus_kodaka    | ASMCGDLCAIKLINDM  |
| 18977903_Pyrococcus_furios      | ASMCGDLCAIKIVREM  |
| 71838180_Pelobacter_propio      | GTMCGEFCAYKVMDDA  |
| 19712998_Fusobacterium_nuclea   | DTMCGKMSMRMCKKM   |
| 67875148_Clostridium_thermo     | DTMCGRMCAVKNTNKA  |

**Note:** All top hits in GenBank searches (using *Cyanidioschyzon* sequence and *Arabidopsis* GI 22136156 as queries) are from proteobacteria, firmicutes and spirochaetes. Primary photosynthetic eukaryotic sequences share many conserved residues with non-cyanobacterial sequences, and likely are not of cyanobacterial origin. The same is also supported by the phylogenetic analyses. The *Arabidopsis* sequence (GenBank accession number NP\_180524 and TAIR locus AT2G29630) is annotated as a chloroplast precursor. The glaucophyte *Cyanophora* sequence was obtained from TBestDB.

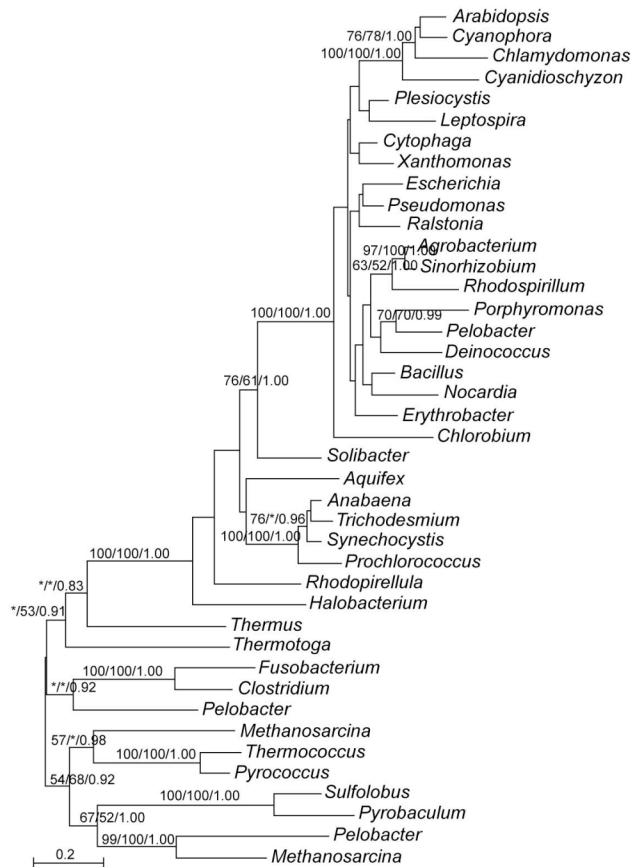

**Figure 4.** Molecular phylogeny of ThiC. P-value = 0.539 from AU test for the presented tree. AU tests were also performed on alternative topologies, including (A) monophyly of red algal, green plant and cyanobacterial sequences, and (B) monophyly of red alga, green plant and archaeal sequences. These tests investigate if red algal and green plant sequences has a plastidic or an archaeal (or eukaryotic) origin. P-values < 0.001 from AU tests for both alternative topologies.

## 5. Diaminopimelate decarboxylase (lysA) (D)

CLUSTAL X (1.83.1) multiple sequence alignment

```

66825991_Dictyostelium_discoi      TPFHIYNGDKIKENGELLMNYFAVKATPNPNSILKLLKEIGMGVDCSSLAE
24213747_Leptospira_interr        TPVFVYSRERIEKSCEVALVRYAMKANPNRTVLEIMKRKGIQIDASSEYE
116056027_Ostreococcus_tauri]    TPTYVYDAPTEARAAVAKVRYAMKASPNAAILKIFKKAGLHVDASSGYE
87306324_Blastopirellula_marin]  TPTFVYDAAKIVERIEDLRIRYAQKACSNLAILDLMRKNGVMVDAVSAWE
21224744_Streptomyces_coelic     TPLWLYDAATIRAQIDRLRIRYAQKACSNLHILRLMREGVHVDAVSEGE
75239202_Escherichia_coli        CPVWVYDAQIIRRQIAALKVRFQKACSNIHILRLMREQGVKVDVSVLGE
118385090_Tetrahymena_thermo     TPLYVYNSQVIKERCQQLLALYACKANTNIAI IKLMKEQGIGIDAVSIQE
145525334_Paramecium_tetrau      SPLYVYDEEIIKRQCQTITVLYACKANTNPNVVKIMKSNVGVGIDAVSPNE
48477088_Picrophilus_torrid     TPLIVLSEKRINNNYLIKIVHYALKANSNPAVISILRRLGAGADAANPNE
126007985_Ferroplasma_acidar    TPVIVYNMARVRENIRRVHFVAVKSNYNPYIVSQI IKEGTGIDAANYNE
60682355_Bacteroides_fragil     TPFYYVDTKVLRDTLACVNVHYAVKANANPKVLTIIRESGLGADCVSGGE
123416580_Trichomonas_vagina    -----
45358763_Methanococcus_maripa    TPLYVMSETQTVKNFTRYVISFAYKANTNLAVTRLLSKLGGCADIIVSAGE

```

15644265\_Thermotoga\_mariti  
CM1350\_Cyanidioschyzon\_merolae  
15231844\_Arabidopsis\_thalia  
88601236\_Glaucocystis\_nostoc  
8134392\_Archaeoglobus\_fulgi  
67919461\_Chlorobium\_limico  
91202264\_Candidatus\_Kuenen  
94970467\_Acidobacteria\_bacter  
15606446\_Aquifex\_aeolic  
108802931\_Rubrobacter\_xyloano  
124516709\_Leptospirillum\_sp.  
94417748\_Pseudomonas\_aerugi  
94499872\_Oceanobacter\_sp.  
77920014\_Pelobacter\_carbin  
15075673\_Sinorhizobium\_melilo  
76258104\_Chloroflexus\_aurant  
118062084\_Roseiflexus\_casten  
23128550\_Nostoc\_puncti  
33240555\_Prochlorococcus\_marin  
87303422\_Synechococcus\_sp.  
21223714\_Streptomyces\_coelic  
116671170\_Arthrobacter\_sp.  
118443019\_Clostridium\_novyi  
51892948\_Symbiobacterium\_therm  
16079395\_Bacillus\_subtil

TPTYVYFEETLRKRSRLVKPTFAVKANNNPVLLKILREEGFGMDVVVTKGE  
SPFYLYSQRIEANVRAYQIGYAVKANNNLMMQLVRRERGCGAVLVSGNE  
RPFYLYSKPQITRNLEAYKIGYAIKANNNLKILEHLRSLGCCGAVLVSGNE  
-----  
TPVYVTSRALLERNLEAYKLLYAVKANNNLALMRI IASHGFGADVFDGGE  
TPLFVTSKRSLLEGLREFETCYSVKANFNLSVISTLAGMGCGDVSNGGE  
TPVYIYSKNALLTRFNEKICFSVKNSNLSVCKILADEGSGFDVVSNGGE  
TPLYTYSATTIRERFDIFNICYSVKANSNLTILKMLVKLGSFGFDVVSNGGE  
TPLYVYSSNFIFKERFEAYRICYAVKANFNPHLVKLLGELGAGADIVSNGGE  
TPAYVYSYAALERAYREVEVCFYAVKANGLAVLRALASLGAGADIVSNGGE  
SPVYIYSEKALREAYSSYQIAYAMKANGLQILSMLGKMGSGADVVSNGGE  
TPTYVYSRAHIEAQYRAYAVCFYAVKANGLVNLVLRALGAGFDIVSRGE  
SPLYIYSRKAFSEHYLEYAICYAVKANSNIAVLNVLAKLKGAGFDIVSNGGE  
TPFYVYSHATLRSRHLAFAISICYSIKANSNLAVLKTFVSHNAGFDIVSNGGE  
TPFYCYSTATLRRHYKVFVSVYAMKANSNQAVLKTGLRGLGAGLDVVSNGGE  
TPLYLLDDLTLRGAMRAYRVHYAGKALLNTALAQIVAQEGLGLDVVSNGGE  
TPLYLFDDEETIRSACRTWRVHYASKALLNTALTHLIADEGLGLDVVSNGGE  
SPLYILDEETLRASACQYRVLYASKAWNCLAVCAIAASEGLGLDVVSNGGE  
TPLYILDELTLRTSCREYKPLYASKANSLII SNIVASEGMGVDVVSNGGE  
TPLYVLDEATLRASCRAVYQALYASKANSLVLSALVASEGLGLDAVSNGGE  
TPAYLLDEADFRERARAWRVYAGKAFLSRAVVRWLDEEGLNLDVCSNGGE  
TPLFVMSNDFRARARAFVYAGKSLFCTAVVRWVEEGLRGLDVVSNGGE  
TPLYVMDEELIRENCRRYRVAYAGKAFLTIAMCQLINEEGMCLDVVSNGGE  
TPLYVMDEELIRQNCRAVYVAYAGKAFCTAMAALVAQEGSLDVVSNGGE  
TPLYVYDVALIRERAKSFKVAYASKAFSSVAMIQLAEEEGLSLDVVSNGGE

66825991\_Dictyostelium\_discoi  
24213747\_Leptospira\_interr  
116056027\_Ostreococcus\_tauri  
87306324\_Blastopirellula\_marin  
21224744\_Streptomyces\_coelic  
75239202\_Escherichia\_coli  
118385090\_Tetrahymena\_thermo  
145525334\_Paramecium\_tetrau  
48477088\_Picrophilus\_torrid  
126007985\_Ferroplasma\_acidar  
60682355\_Bacteroides\_fragil  
123416580\_Trichomonas\_vagina  
45358763\_Methanococcus\_maripa  
15644265\_Thermotoga\_mariti  
CM1350\_Cyanidioschyzon\_merolae  
15231844\_Arabidopsis\_thalia  
88601236\_Glaucocystis\_nostoc  
8134392\_Archaeoglobus\_fulgi  
67919461\_Chlorobium\_limico  
91202264\_Candidatus\_Kuenen  
94970467\_Acidobacteria\_bacter  
15606446\_Aquifex\_aeolic  
108802931\_Rubrobacter\_xyloano  
124516709\_Leptospirillum\_sp.  
94417748\_Pseudomonas\_aerugi  
94499872\_Oceanobacter\_sp.  
77920014\_Pelobacter\_carbin  
15075673\_Sinorhizobium\_melilo  
76258104\_Chloroflexus\_aurant  
118062084\_Roseiflexus\_casten  
23128550\_Nostoc\_puncti  
33240555\_Prochlorococcus\_marin  
87303422\_Synechococcus\_sp.  
21223714\_Streptomyces\_coelic  
116671170\_Arthrobacter\_sp.  
118443019\_Clostridium\_novyi  
51892948\_Symbiobacterium\_therm  
16079395\_Bacillus\_subtil

LILSEKVGFKNEEIMFTSNNTKSEYKAYELGSINLDDYTQIEYLYEIS  
VLRAIHGYGKPEQIMLTSQELAKG-LKELVEKGVFNACSLRQLETFGNVS  
CERAMRAGFAGDEISLSTQEL-PSFFPELVEKGVINACSLDQLERFAGIG  
IRRALAAGYEPAPLVYTADIFDHEALALCVEHGLVNCGSPDMIAQLGEIT  
IERALAAGYDDEPIVFTADLLNRSTLRRVVELGIVNAGSPQMLDQVGRVW  
IERALAAGYHPDDIVFTADVIDQATLERVSELQIVNAGSVMDLQGLQVW  
VLLAKKAGFEGRDIQFTENFIGQKEVEDSLKEGILCIGELDTLETLQVVA  
VEVALQAGFLNQQITFTANYMTKEEIDYAIQKGVNLVGEIDTLKKL--VI  
AEIAMYSGISPDNIIMTGNLSYNDLKRALEMNIINFDVQNMILKNIS  
VKLAIMCGLGSRDIIATPNNLSGTELRITKEGVINFDHEGGLKLVGS  
IRAAIKAGFPAGKIVFAGVKGADWEIDLGLDYDIFNVESVPELEVINEVA  
-----  
LYIAKLSVDPSEKIVFNGNCKLKEEIKMGIEAEIFNVDSISELVLINEVA  
LLAAKLAGVPSHTVVWNGNGKSRDQMEHFLREDVVNVDSFEEMEIWREYF  
LRLARLAGFDMRRTVFNNGKTPQEI ALAVRAECINVDSEFDLENILAVL  
LRLALRAGFDPTKCIFNNGKSLLEDLVAAQEGVVNVDSFDLNNIVEVL  
-----  
LYLASLAGFRKDMVLFNGNSKRKEIEMGVTAGVFSVDSLDELRTISKIA  
LFRALKAGVSPEKII FAGVGKPEEIAFALEAGVLKVESLSELEAIVERVA  
LFRALKAGGKPKSIVFAGVGKTDKEIQYALENDIFNVESIAEIEHINAVA  
LERVLVDDKAAKVVVSGVGKTAPEMDLAIKSDIFNIESELELLASIA  
LYLAKKAGIPPERIVYAGVGTKEKELTDVAVDSEIFNVESRQELDLNIEIA  
LYRAMRAGFDPKVVVAGVGKTEQELKAGLGERIFNVESAGELEHLERVA  
LFRARRAGIPSDRIVFAGVGKTDGEMREIDAIFNVESSEMLDRLSRVA  
LERVLAAGDPAKVVVSGVGKSRDDMRRALQVGFNVESSELERLQRVS  
LERVLKAGGDPKIVFSGVAKTADMRRALAVGVFNVESSELERLNALS  
LFRQQVQCDPAKIVYSGVGKTEAEIADALQAGIFNVESRQELDTINAI  
LRRALAAGIPAGRIMFSGVGKTAEMDFALEAGIFNVESSEPELEVLNQVS  
LLVAQRAGLPMDRVHLHGNAKSDQELERAIARVIVVDNLDELQRLCAVL  
LYVALRAGFPQRIMHGNNAKTRAELEQALASGIIIVDNLDELAMLANIA  
LYTALQAGVSPEKIYHLGNNKSREELILAEISGVIVADNWEYELRVLVEIM  
LITALKGGVSSNIVFHGNNKSSELIMAYKNDVIVLDNQYDIDQLRELM  
LLTALQGGMPPERIVLHGNNKSDEELSLAVAHGVVVDNDHDLERLAEML  
LATALSAGMPAERIAFHGNNKSPEEIERAVRAGVIVLDSFQEI VRVAHVQ  
LAVARAGIPGADVALHGNNKSDAEIHRAALDKLIVVDSLAELEIAAAM  
LYTAYKSEFPMEKIYFHGNNKTLLEEIDMGVRLGVFVADNFYEIENKIL  
IATALQAGFPMDRITYFHGNNKTAEEIRLAEAGVVFVDSLHELENNRAL  
LYTAVAAGFPAERIHFHGNNKSREELRMALEHRIIVVDNFYIEALLEDVL

66825991\_Dictyostelium\_discoi  
24213747\_Leptospira\_interr  
116056027\_Ostreococcus\_tauri  
87306324\_Blastopirellula\_marin  
21224744\_Streptomyces\_coelic  
75239202\_Escherichia\_coli

FRYNPGPLKKGNDIIGN-PKDAKFLGTSVKRFLGHCVMASNELDTFEMVN  
VRFNPGLGSGQTKKTDVGGKTSFSGFIWYKIFKVHTHIGSGS-DECKILN  
VRFNPGLGSGGTKTNGVGGPSSSFGIYWKVVRVHTHIGSGS-DDVTTLN  
LRINPGFGHGHSQKNTTGGQSKHGIWHVRVTGLHMHIGSGT-DTITITIS  
IRINPGFGHGHSRKTNTTGGESKHGIWHLDLVGLHMHIGSGV-DDIRAIS  
LRVNPFGFGHGHSQKNTTGGENSKHGIWYLVGLIHMHIGSGV-DDLQAI

118385090\_Tetrahymena\_thermo  
145525334\_Paramecium\_tetrau  
48477088\_Picrophilus\_torrid  
126007985\_Ferroplasma\_acidar  
60682355\_Bacteroides\_fragil  
123416580\_Trichomonas\_vagina  
45358763\_Methanococcus\_maripa  
15644265\_Thermotoga\_mariti  
CM1350\_Cyanidioschyzon\_merolae  
15231844\_Arabidopsis\_thalia  
88601236\_Glaucocystis\_nostoc  
8134392\_Archaeoglobus\_fulgi  
67919461\_Chlorobium\_limico  
91202264\_Candidatus\_Kuenen  
94970467\_Acidobacteria\_bacter  
15606446\_Aquifex\_aeolic  
108802931\_Rubrobacter\_xylano  
124516709\_Leptospirillum\_sp.  
94417748\_Pseudomonas\_aerugi  
94499872\_Oceanobacter\_sp.  
77920014\_Pelobacter\_carbin  
15075673\_Sinorhizobium\_melilo  
76258104\_Chloroflexus\_aurant  
118062084\_Roseiflexus\_casten  
23128550\_Nostoc\_puncti  
33240555\_Prochlorococcus\_marin  
87303422\_Synechococcus\_sp.  
21223714\_Streptomyces\_coelic  
116671170\_Arthrobacter\_sp.  
118443019\_Clostridium\_novy  
51892948\_Symbiobacterium\_therm  
16079395\_Bacillus\_subtil

VRINPDVGVGECEHTITGGPKSKFGIYICIEIEGHIHQHIGSNMVQGLKFIN  
IRLNLDVVGIGHHNVNTGGNDSKFGINLVKIIGLHQHMGSKIMKYLKYID  
FRINPGYNGEFTGIKTAGPSSKFGIPVVKKFGIHHMAGSNNLDSFDFID  
FRINPGIGKGEFFGITGGKNVKGISVVKHFGIHHMTGSNVLEDFDFID  
FRINPNVGAHTHANITGLAENKFGISMVKFGLHFHIGSQILDLVEHIN  
-----MLDNVKILD  
FRVNPNDVDAKTHPKISTGMKKKFGLDIVKIVGICHIGSQITKIRDVN  
IRVNPEVDAKTHPHISTGLKKHKFGIPLMNRGLVHIGSQITRGFEEIN  
LRINPDIDPQVHPYVSTGLATSKFGIRTVELVGVHSHLGSITKKSIRFLN  
LRINPDVDPQVHPYVATGNKNSKFGIRNLKLVGAHCHLGSITKEVSYLN  
-----  
FRVNPVDVDPKTHPKIATGLRESKFGIPHVVPVGIHCHIGSQILDELSFVD  
LRINPNVTAETHPYITGGDSKEKFGIDEVRLVCLDMHIGSQIFDSIEYLD  
LRINPDIDAKTHAKTTTGKKNKFGIDLVTICGIVHVLGSPFIYSNIQYLN  
FRVNPDPVPAETHPYISTGLREHKFGVPILEPAGVSVHIGSQITDNIRLID  
IRVNPVDVDPKTHPYIATGMQKSKFGVDILEIVGICHIGSQILDDIKYLD  
LRINPGVDPGTHEHISTGNVESKFGIPAVDLIGVHQHIGSQIVKDIRYLN  
LRVNPVDVDPKTHPYISTGMKKKFGIPVIRIVGICHIGSQITTEEVFWLD  
LRVNPVDVAQTHPYISTGLKENKFGIAILEVIGVDCCHIGSQITQAIRHLD  
LRVNPVDVAQTHPYISTGLKENKFGVDIEIKGVDCHIGSQITQELEHID  
IRVNPVDVDPQTHPYISTGMKKAKFGINILEVIGVDCCHIGSQITKGIKYLD  
FRINPDVDAKTHAKISTGKKNKFGISWIEVTDIMHIGSQITFENIEHVD  
LRVAPAIEADTHAHIAATGSATAKFGPLLRWLGLHAHIGSQIFAAPVELS  
LRIAPDVTNTAHAIQTGHATSKFGLPLLCILGLHAHLGSQLFDIIQQIN  
LRLTPGIECHTHEYIRTGHLDSKFGFDPLDCVGVHAHIGSQIFENITELN  
LRLTPGIECHTHEYIKTGHIDSKFGFDPGELIHLHAHIGSQIFESINALN  
LRLTPGIECHTHEYIRTGHLDSKFGFDPARLTGLHAHIGSQIFEPVSDLN  
IRITVGVAEHTHEFIATAHEDQKFGIPLEVIGIHSIGSQIFDELPEID  
LRLTPGVHAHTHEFIATAHEDQKFGLSMIELLGLHCHIGSQIFEVLPELD  
LRLTPGIEAHTHDYIKTQIDSKFGFDLIEFVGFHCHIGSQIFETIKELD  
LRLTPGVAEHTHEYISTGQLDSKFGIPVELLGFHCHIGSQIFDTPSELS  
LRLTPGVAEHTHDYITGQEDSKFGFDLIQLLGVHCHIGSQIFDVSKVLN

66825991\_Dictyostelium\_discoi  
24213747\_Leptospira\_interr  
116056027\_Ostreococcus\_tauri  
87306324\_Blastopirellula\_marin  
21224744\_Streptomyces\_coelic  
75239202\_Escherichia\_coli  
118385090\_Tetrahymena\_thermo  
145525334\_Paramecium\_tetrau  
48477088\_Picrophilus\_torrid  
126007985\_Ferroplasma\_acidar  
60682355\_Bacteroides\_fragil  
123416580\_Trichomonas\_vagina  
45358763\_Methanococcus\_maripa  
15644265\_Thermotoga\_mariti  
CM1350\_Cyanidioschyzon\_merolae  
15231844\_Arabidopsis\_thalia  
88601236\_Glaucocystis\_nostoc  
8134392\_Archaeoglobus\_fulgi  
67919461\_Chlorobium\_limico  
91202264\_Candidatus\_Kuenen  
94970467\_Acidobacteria\_bacter  
15606446\_Aquifex\_aeolic  
108802931\_Rubrobacter\_xylano  
124516709\_Leptospirillum\_sp.  
94417748\_Pseudomonas\_aerugi  
94499872\_Oceanobacter\_sp.  
77920014\_Pelobacter\_carbin  
15075673\_Sinorhizobium\_melilo  
76258104\_Chloroflexus\_aurant  
118062084\_Roseiflexus\_casten  
23128550\_Nostoc\_puncti  
33240555\_Prochlorococcus\_marin  
87303422\_Synechococcus\_sp.  
21223714\_Streptomyces\_coelic  
116671170\_Arthrobacter\_sp.  
118443019\_Clostridium\_novy  
51892948\_Symbiobacterium\_therm  
16079395\_Bacillus\_subtil

LGGGIGIPYRNVVTECGRIVITGPYGLVLTAKIHSKKEYIGVDACMVNLMR  
LGGGFKVGRMRLEIEPGSFLMVNNGSILTTVDVVYTFVKLDAGMDVNTR  
LGGGYKVRMKTLEIEPGRFLVANSACAVTRVQDKVHTFLKLDAGMTDLIR  
AGGGLPIPYNSLEIEPGRYLSAESGFLLAERAIKKNFYVVDAGFNRLAR  
AGGGLSVPYTRLEIEPGRFLVAGAGVLAEEVRAQKNYFVLVDAGFNLMR  
AGGGLSIPYQKLEIEPGRFLVAQAGVLITQVRSVRRHFVLDVAGFNLMR  
VGGGIGVPIYEEIRVEPGRFLVAESGHLTTVTAIKSTWIGTDMNHLIR  
IGGGFGVKYQMLFIEPGRYLIAESGYLLCTVQAINRTFVGTDSGMHHLIR  
IGGGFGVPHYKEIIIEPGRYLVDAGIALATVTDLKRISAGTDLGMNHLIR  
IGGGFGVPHYTRLIEPGRYIVADSAILLSKVTISIKRELIGIDAMNHLIR  
VGGGLGIDYETLHFEFGRAITGQCGLSISKVLYVKKQFVAILDAGMTDLIR  
VGGGLGVSYTEIHFELGRSIIICQCSLVTKLLYIKRNFIVDGGMTDLIR  
LGGGLGIPYDNLILEPGRSLVATAGVLLGTVEHVAKVWMDAGMNDMMR  
IGGGWGINYSRVIVEIGRYIVAPSGYLLRVLVKKAFVVDGGMNHLIR  
TGGGLIDYETLIEPGRSLIGNAGILVCRVIGVKKRFIVVDGSMALIR  
IGGGGLIDYNYLIEPGRSLIANTCCFVNHVTGVKKNFIVIDGSMALIR  
-----GTMVEPGRSIVGNTGMLVKNVTGVKKNFIVTDGSMALIR  
MGGGLGIDYEQWLEPGRSIVGNTTVLITRVNAVKKNFVAVDAGFNVLIR  
IGGGFPVTDVPIFEPGRFLVANASVLLSRILYKQFYIVDAGMTDLIR  
IGGGYCSYTRVIMEPGRFITGNSGILVTSVIYKKNFVICDAAMNDLLR  
GGGGLGIAYRHLLLEPGRAIIGPAGALLTRVVSXKTFVIVDAGMNDLIR  
IGGGGLGIYKIKIILEPGRSIMGNAGILITQVQFLKHHFIVDAGMNDLIR  
IGGGGLGIRYRKLICEMGRYIAGPAGALLTGVLRYKRSFIVADAGMNDLIR  
VGGGLGIRYGGIILEPGRSIVGNAGILVTEVQYLLKMFYIADAGMNDLIR  
LGGGLGVRYRTLVEPGRSIVANAGVLLTRVEYLLKDFIIVDAAMNDLIR  
LGGGLGVTYDKLVLEPGRSIAANAGIFVTQVEFLKHHFAIIDGGMNDLIR  
LGGGLGITYETLVFEPGRVMVGNAGMLVSKVLYVKKNFVIVDAAMNDLIR  
IGGGGLGIPYRKLIVTEPGRSIVNAGILVTEVYVKKTFVIVDAGMNDLIR  
PGGGLGVPHYTRLIVTEPGRSIVARAGVALYRVVGRKEHWHIDGGMNDLIR  
IGGGAGVPHYTLVIEPGRSIIARAGVALYTIATKMRFLHIDGGMNDLIR  
VGGGLGIKYTKLLSEPRSLIATACVTAITVGSKRRTYVAIDGGMNDNPR  
LGGGLGIRYILLMCEPGRSIVGSAGLTLYKIGSRKTYLSVDGGMNDNPR  
VGGGLGIRYVRLLEPGRSLVATAGLTVYITIGSRKRTYLSVDGGMNDNPR  
LGGGLGIAYTRISVEPGRSIVGPTAFVTVYEVGTVKKRTYVSDGGMNDNIR  
LGGGYGIAYTRISIEPGRSIVGPTAFVTVYEVGTLLKRRYVSDGGMNDNAR  
LGGGFGIYYGSLVIEPGRSIVNAGTLYTVGSIKRKYVSDGGMNDNIR  
LGGGLGVRYVVKLIVTEPGRSIVAEAGTLYTVGTIKRKYVSDGGMNDNIR  
LGGGFGIRYTEIWIIEPGRSLVGDAGTLYTVGSQKRYVAVDGGMNDNIR

: \* \* : \* :

66825991\_Dictyostelium\_discoi  
24213747\_Leptospira\_interr  
116056027\_Ostreococcus\_tauri  
87306324\_Blastopirellula\_marin  
21224744\_Streptomyces\_coelic  
75239202\_Escherichia\_coli  
118385090\_Tetrahymena\_thermo  
145525334\_Paramecium\_tetrau  
48477088\_Picrophilus\_torrid  
126007985\_Ferroplasma\_acidar  
60682355\_Bacteroides\_fragil  
123416580\_Trichomonas\_vagina  
45358763\_Methanococcus\_maripa  
15644265\_Thermotoga\_mariti  
CM1350\_Cyanidioschyzon\_merolae  
15231844\_Arabidopsis\_thalia  
88601236\_Glaucocystis\_nostoc  
8134392\_Archaeoglobus\_fulgi  
67919461\_Chlorobium\_limico  
91202264\_Candidatus\_Kuenen  
94970467\_Acidobacteria\_bacter  
15606446\_Aquifex\_aeolic  
108802931\_Rubrobacter\_xylo  
124516709\_Leptospirillum\_sp.  
94417748\_Pseudomonas\_aerugi  
94499872\_Oceanobacter\_sp.  
77920014\_Pelobacter\_carbin  
15075673\_Sinorhizobium\_melilo  
76258104\_Chloroflexus\_aurant  
118062084\_Roseiflexus\_casten  
23128550\_Nostoc\_puncti  
33240555\_Prochlorococcus\_marin  
87303422\_Synechococcus\_sp.  
21223714\_Streptomyces\_coelic  
116671170\_Arthrobacter\_sp.  
118443019\_Clostridium\_novyi  
51892948\_Symbiobacterium\_therm  
16079395\_Bacillus\_subtil

PGMYGAYHHITVLYDVGSLCENNDKFCIDRSLKIHRGDTLVIHDTGAHG  
PSLYAAKHPLVVVVYVGHCCESGDLFTQARITEAKLGDYVMEGAGAYC  
PSLYGSOHPLVSVYVGHCCESGDLMPARTMEVNIIGDFIVIEGSGAYC  
PILYGSYHPMSIAVVVGGPLCESGDIFTOERSLAASIGDFLVIIECAGAYG  
PAMYGSNHRVSVLTVLAGPLCESGDVFTQVVPVVRTDVGDLVVFHDTGAYG  
PAMYGSYHHISALTVVAGPLCESGDVFTQORALEVKAGDYLVLHDTGAYG  
PALYESYHKIENAVNVCNICESGDVFGQNRITVVKDDILAIYNGGAYG  
PALYESYHEIINSVTVCGNICESGDLGLVDRNLKVEVNDVLIQNGGAYG  
PALYGAVHEIICIIDITGQICENTDFTGLNVKLGLEPGDILGIMNAGAYV  
IPLYGARHGILLSFDIVGQVCENTDYIAKDISEPAVGDIVVIADAGAYV  
PALYQAHHKMNLYDVGPICESSDVFQKAVDLKVKRGLLIALRSAGAYG  
PALYNAPHLVENVFDVGPVCESSDVIASHVKMDAKRGDYVIRSAGAYG  
PAIYESYHEITPCVSVAGLCESSDVFQKREIKMEVKTVAILLDVGAYG  
PALYSAYHRIFVLADVVGPVLCESGDVIAYDRELEVEPGDI IAVENAGAYG  
PALYGAYQLITLTYDVGPICESSDVLGKARVLLPAPGTGLAVMDSGAYC  
PSLYDAYQHIELVFDVGPVCESSDVLGKDRMLTPPEGAGIAVFDAGAYC  
PALYGAYHEIVAAVDVGPVCEADFLGKDRMLTPPEGAGIAVFDAGAYG  
PAMYGSYHRVAVAYTVVGPICESGDVLARDRKLVKVEVDLIAVFDAGAYG  
PALYQSHHEVLTAVDVGPICESSDVFARQRTIDAEEGELLAVMSSGAYA  
PALYDAFHRIWPVVDIVGPVCESSDVFQKRAIPVNEGDLIAVFDAGAYG  
PALYGAYHEIVAAVDVGPVCEADFLGKDRMLTPPEGAGIAVFDAGAYG  
PSIYNAYHHIIPVADIVGPICETGDFLALDREIEVQRGEYLAVLSAGAYG  
PSLYGAYHEVLPALDVGPICESSDVLARDRDLDAEGDVLAVMNAGAYG  
PSLYGAFHDLWPVGDVGPVCEADFLVQDRELPAEPGDLAVMSAGAYG  
PALYGARYSAVLAVNVGGRYCESGDVLLRDIALTVPDDLLAVATAGAYT  
PSLYSAWQRIVEVYDVGPICESSDVLGKDRMLTPPEGAGIAVFDAGAYG  
PALYGSYQGIQAVADVGPICESGDVLAQDREIAFSGQDLLAVASAGAYG  
PTLYEAYHEIRPVADVGPVCEADFLALDREMPPKPGDLFAIGSAGAYG  
PALYGARYSAVLAVITGRYCESGDVLIHAAPLRASVGDILAVPVAGAYT  
PITYQSVYRAVAVTITAGKHCESGDILIKNALLKTEPGDILVVMGTGAYN  
PITYQSEYSACLVTITAGKHCESGDVLKDFRLRSNSGDVLGVFSTGAYN  
PITYQSSYTAVALVAVTITAGKHCESGDVLKDLALPSSSGDVLVVFATGAYN  
TALYDAEYSVALAVRVVGGKHCESGDILVVKDAFLDLAPGDILAVPATGAYC  
PVLYDADYSIAIVASRVVGGKHCESGDILVVRDYLDAAGDLLAVPGTGAYC  
PALYRASYECLVAVTISGKCCESGDILLENVVKVHAESGDILAVLTGTGAYG  
PALYHARYECAVAVTVVGRYCESGDVLLTDAADVAPGDLLAVFATGAYN  
PALYQAKYEAAAASVIAAGKCCESGDMLIWDIDLEVKEGDLLAVFCTGAYG  
\* : \* \*\* \* . . \*\*:

66825991\_Dictyostelium\_discoi  
24213747\_Leptospira\_interr  
116056027\_Ostreococcus\_tauri  
87306324\_Blastopirellula\_marin  
21224744\_Streptomyces\_coelic  
75239202\_Escherichia\_coli  
118385090\_Tetrahymena\_thermo  
145525334\_Paramecium\_tetrau  
48477088\_Picrophilus\_torrid  
126007985\_Ferroplasma\_acidar  
60682355\_Bacteroides\_fragil  
123416580\_Trichomonas\_vagina  
45358763\_Methanococcus\_maripa  
15644265\_Thermotoga\_mariti  
CM1350\_Cyanidioschyzon\_merolae  
15231844\_Arabidopsis\_thalia  
88601236\_Glaucocystis\_nostoc  
8134392\_Archaeoglobus\_fulgi  
67919461\_Chlorobium\_limico  
91202264\_Candidatus\_Kuenen  
94970467\_Acidobacteria\_bacter  
15606446\_Aquifex\_aeolic  
108802931\_Rubrobacter\_xylo  
124516709\_Leptospirillum\_sp.  
94417748\_Pseudomonas\_aerugi  
94499872\_Oceanobacter\_sp.  
77920014\_Pelobacter\_carbin  
15075673\_Sinorhizobium\_melilo  
76258104\_Chloroflexus\_aurant  
118062084\_Roseiflexus\_casten  
23128550\_Nostoc\_puncti  
33240555\_Prochlorococcus\_marin

HSMGFNYNGKLRSAEYLLNNSINCIRRAETFDLFS  
SSMSTNYNSFPETAEVLVDSDFSQILRRRQNWEIFQ  
AGMASNYNSFPEAPEVMRRGADMVCIRRKQTLQDILS  
FVMGSNYNSKPLAAEVLIRDGQTHLIRERQTFENLIA  
ASMSSTYNSRPLIPEVLVDGAETRLIRRRQTVAEALLA  
ASMSSNYNSRPLPEVLFDNGQARLIRRRQTEBELLA  
YCMASNYNSRNRPAEILVDGSDVKLIRRRRETDQLA  
FMSNNYNSRNRPAEILVDRSKPYIIRKRETLDYLLA  
SSMSSNYNSLSRAAEVLISDDNVHLIKKRDDIRDIIN  
ASMASNYNSRPAELVLEGDREILTKGHDGLESMLA  
ETMASNYNCRELPKGYI-----SEELV----  
ESMASSYLCDIPLGYI-----SEEFQDN--  
ISMANNYNSRGKPAMILTNEKEVSLIRARETLADLIS  
YTMSNNYNSSTRPAEVLVRENRLISLIRRRRETEMDFK  
MSMASNYNSMKVLPGELMVQGNRWRIIRQRQFADLLS  
MSMASTYNLKMPPPEYVVEEDSITKIRHAETFDHDLR  
YCMSSNYNSMKMRPPEYLVGDVKTLLIRKGESLDEWMK  
FVMSSQYNGRPRCAEVLVSGDRWDVIREKESYGDLE  
AVMSSNYNGLRPAEVMVDGQEVTVIRRRRETYEQLIA  
FTMSSSYNSRPRSCIEILVDRDKYIVIRKRETYEDLIA  
MSQTSNYNTRPRPAEVLVEGSRKAVVRRRETIKDLLG  
FAMSSHYNMRPRAAEVLVENSVKLIRKRENYDYIVE  
FMSASNYNSRPRPAEVLVREDRWAVVREHEYPDLIR  
FAMASNYNARPRPAEVLVSGDRFSVIRARETYEDLIR  
FVMSSNYNTRGRAAEVLVDGERAHEVRRRETPPELYA  
FVMSASNYNTRKPAEVMVDGQSHLIRRRRETIQDLM  
FTMSSNYNSRRRVPEIMVKGDQVMVIRKRETYDDLK  
AVQAGTYNSRLVPEVLVKGDRFHVIRPRRDYDELIG  
LSMSSYNSLVRPALVLDVADGQARLIQRRETEADVLA  
LSMASTYNLTPRAVVMVNGGSRVLIQRRETYEDMIA  
YSMASNYNRLPRPAAVVANGEANLILQRETYQDLIR  
FMSMSSNYNRIKPAAIIVGNGESELIQKRELPEDLLR



|                                |                                       |
|--------------------------------|---------------------------------------|
| 87303422_Synechococcus_sp.     | ASMASNYNRIIPRAAVLVHGGQAEVQRRERPEDELL  |
| 21223714_Streptomyces_coelic   | RSMASNYNHALRPPVAVRDGAARVVVRRETEEDLLR  |
| 116671170_Arthrobacter_sp.     | WALSSNYNLYARPGVVAVRDGSARLIVRGETEQDLLN |
| 118443019_Clostridium_novy     | YSMSSNYNKIPRAVVFVNRGQSKLICKRQSYEDLVS  |
| 51892948_Symbiobacterium_therm | YSMASRYNRFPTPAVVFVRDGRADLVVRRETFADMAA |
| 16079395_Bacillus_subtil       | YSMANNYRIPRAVVFVENGEAHLVVKRETYEDIVK   |

\*

**Note:** All top hits in GenBank searches (using *Cyanidioschyzon* sequence and *Arabidopsis* GI 15231844 as queries) are from various non-cyanobacterial groups. The donor of the acquired gene in primary photosynthetic eukaryotes (upper part of the tree) is difficult to pinpoint because of the lack of sufficient internal support on the gene tree, but it is unlikely from cyanobacteria based on AU tests. The *Arabidopsis* sequence (GenBank GI 15231844 and TAIR locus AT3G14390) is annotated as a chloroplast precursor.

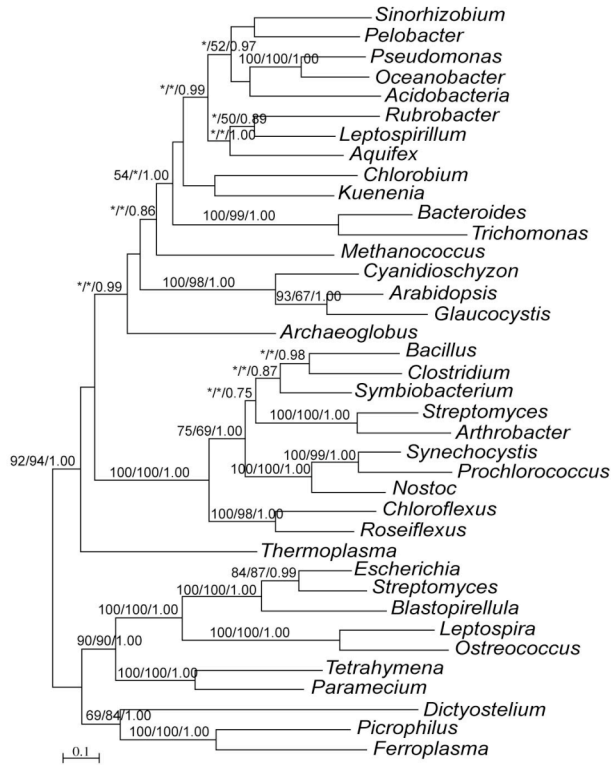

**Figure 5.** Molecular phylogeny of *lysA*. See text for detailed explanation. P-value = 0.235 from AU tests for the presented tree. AU tests were also performed on alternative topologies, including (A) monophyly of all eukaryotic sequences, (B) monophyly of cyanobacterial and primary photosynthetic eukaryotic sequences (except for the *Ostreococcus* sequence that appears to be distant). These tests investigate if red algal, green plant and glaucophyte sequences have the same origin (mitochondrial or eukaryotic) with other eukaryotic sequences and if red algae, green plants and glaucophytes acquired this gene from plastids. P-values < 0.001 from AU tests for both alternative topologies.

## 6. MGDG synthase (N)

CLUSTAL X (1.83.1) multiple sequence alignment

125975655\_Clostridium\_thermo  
89202509\_Bacillus\_cereus  
49483181\_Staphylococcus\_aureus  
56478620\_Azoarcus\_sp.  
116623425\_Solibacter\_usitat  
125974899\_Clostridium\_thermo  
76259735\_Chloroflexus\_aurant  
118063998\_Roseiflexus\_casten  
118062512\_Roseiflexus\_casten  
145343579\_Ostreococcus\_lucima  
18397057\_Arabidopsis\_thalia  
115475782\_Oryza\_sativa  
30687800\_Arabidopsis\_thalia  
115479239\_Oryza\_sativa  
30689152\_Arabidopsis\_thalia  
CM1391\_Cyanidioschyzon\_merolae  
GT000086114\_Guillardia\_theta  
94985286\_Deinococcus\_geothe  
51891890\_Symbiobacterium\_therm  
37522798\_Gloeobacter\_violac  
76259734\_Chloroflexus\_aurant  
78061400\_Burkholderia\_sp.  
118063689\_Roseiflexus\_casten

NILILSSNTGHGHSITESLLEQFSH-YPDV-NVHVIDYGSVTRNAKLWK  
KVLILTAHYGNHGVQVAKTLEQAFHQKIE--DVIVCDYLKSYTIGKLYR  
KILIIITGSGFNHMQVTQSIVNQLNDMNLHDLSVIEHDIYNSFKYFRMYK  
IVDLIYFNAGGGHRATAVALGAVLRQRKPE-WQVRLVNYRSITGSAPDWY  
KLDFIYFDAGGGHRAAANALRQVMEQ-QGRPCEIRMVNRKFTGLRLQIYN  
NVLFSLISLGGHIRAAEALQKFVVQKYPKS-KTLIVDYLNIVKYVPIYG  
DVLFAISDTGGGHRSAVAISAALQMSGASITWAIEDYDQLSTRWLLYN  
RILFAISDTGGGHRSGAQIAAAIEQVRVGDVETIIDIYDKLSTRWLLYD  
RILILTTDAGSGHRSAQAQAVEAALLHVYRHNQVTIANYLSTIQHAPRYD  
RVMCLMSDTGGGHRASAQALKDCFELIYGDEFVHIVDYFFLVKNPWLWR  
TVLILMSDTGGGHRASAEAIRDAFKIEFGDDYRIIIKDYKFMVKHVLWS  
NVLILMSDTGGGHRASAEALRDAFRLEFGDAYQVFRVRYKFMIRHVRLWK  
NVLILMSDTGGGHRASAEAIRDAFKIEFGDKYRVIVKDYKFMVKHVLQWLK  
KVLILMSDTGGGHRASAEAIKAAFIEQFGDDYQVFTVTDYSFLVKHGFLWK  
KVLILMSDTGGGHRASAEAIRAFNQEFGDEYQVFTVTDYNFLVKHGFLWK  
RALLLSIDTGGGHRASAYAIRDAMNELYPGAFEFWIVDYQFLAKNPPLWR  
---ILQS-----APRATSSHMKD-----  
RALILSASFGSGHQANDALDRALRA-AGVNLRARHADYAAWLRYPAMYK  
RILLLSADFSGSHLAAATAIAAACRSLSDACEAVVVCYLWQIRHTPLYR  
RILIFHASLGSGHIAANALGEAFSR-YPDV-EVRIEDYEQLSEKAPLYR  
RVLILHASVGTGHKRAEALAAAFSRQPG--EVRVEDYLELTDRAVPWG  
KILLLSVSAGAGHTRAAEAI-RAFADHHPAGIEATHLDYIKLVSSQPLWG  
RILILSTSAGSGHKAAAAALEKVFRQ-SPQVAELVNLDYLRVQERPLVG

125975655\_Clostridium\_thermo  
89202509\_Bacillus\_cereus  
49483181\_Staphylococcus\_aureus  
56478620\_Azoarcus\_sp.  
116623425\_Solibacter\_usitat  
125974899\_Clostridium\_thermo  
76259735\_Chloroflexus\_aurant  
118063998\_Roseiflexus\_casten  
118062512\_Roseiflexus\_casten  
145343579\_Ostreococcus\_lucima  
18397057\_Arabidopsis\_thalia  
115475782\_Oryza\_sativa  
30687800\_Arabidopsis\_thalia  
115479239\_Oryza\_sativa  
30689152\_Arabidopsis\_thalia  
CM1391\_Cyanidioschyzon\_merolae  
GT000086114\_Guillardia\_theta  
94985286\_Deinococcus\_geothe  
51891890\_Symbiobacterium\_therm  
37522798\_Gloeobacter\_violac  
76259734\_Chloroflexus\_aurant  
78061400\_Burkholderia\_sp.  
118063689\_Roseiflexus\_casten

LWVWELSLKLIKNIKPDILSVHPNFGSVLNKIVPFTVLLADIVSITPL  
LFYYGVLKALLHTEKPDIVINTFPIIAVPELKKSIIPVYNVLTDF-CLHKI  
GFYYSRLINLLIKEKPDILLLTFPTVMSVLTENIPVATVMTDY-RLHKN  
NKRLLARQQHWAQTEPDLVSVLVPNFRALFESGVPVHTMLTDLADVPPF  
LLLKKGLEAFWQKSRPDMVSVLVPNFRALCESGVPVFTITLTDIADYPPF  
GLYRMSIHRLLIQSFKPSIIVCTHPFPLQMIHLDVPSIAIVTDF-VNHPS  
FSFQTLNRLTERRRPLVVVTHPLVHRLVCAASFRVLTVDLVLTHAS  
TLYRLTILRVLEAVQPTLVVSVHPLNRLIGNASFRFITVVDLVLTHAS  
RAHTLTLHRLVRHAPDVVIVSYPLFTALVADARPGLMTVVVDLGHVHT  
LNFRCFSARAFKEIDPHLIVSVHPLMQHVPMRVRVPFATVVDLTRCHAT  
VAFHGTLEAGLMEYKPDIIISVHPLMQHIIPLVWVVFVTVITDLNCHRT  
VAFHGTVAVAGIMRYNPDIIISVHPLMQHIIPLVWVVFVTVITDLNCHPT  
VAFHSTVEAGLMEYKPEIIISVHPLMQHIIPLVWRVLFVTVITDLNCHPT  
MTYYGTVAQGLMKYQPDVIVSVHPLMQHVPLRIKIPFTVTVITDLNCHPT  
MTYYGTVAQGLMKYQPDVIVSVHPLMQHVPLRVKIVFTVTVITDLNCHPT  
ATYCYGIRAAINCIRPDLVLSLHPLTQMLPLRVRIIPVTVVTDLGGAHAT  
-----RIPFVTVVTDLGEAHPW  
AFYEWMTLRDLRAVRPEVVVVSFPTVALAHTADFLNALVVTDRVHHH-  
QLYRLPVRRALQYNNPDVVVGTTHPFPAGAALHLRVPVVMALTDF-APHGF  
LIYEGSFQLIKQITAPDVFCVQQIIPSRVLQLF--PHYVVITDA-VAHST  
YFYTQTLKEVLRAPQPEVICHTHFLPMELLVSYTEPIYCVITDY-AAHTF  
YLYQKTLLEAIEERQRPDAICTHFLPAELLSREDTPVWVQVTDV-DLHSM  
WVYQASLTRFIREFKPTITVCTHFMAGIVAQLDTRLAIVTVDY-DFHSM  
:\*

125975655\_Clostridium\_thermo  
89202509\_Bacillus\_cereus  
49483181\_Staphylococcus\_aureus  
56478620\_Azoarcus\_sp.  
116623425\_Solibacter\_usitat  
125974899\_Clostridium\_thermo  
76259735\_Chloroflexus\_aurant  
118063998\_Roseiflexus\_casten  
118062512\_Roseiflexus\_casten  
145343579\_Ostreococcus\_lucima  
18397057\_Arabidopsis\_thalia  
115475782\_Oryza\_sativa  
30687800\_Arabidopsis\_thalia  
115479239\_Oryza\_sativa  
30689152\_Arabidopsis\_thalia  
CM1391\_Cyanidioschyzon\_merolae  
GT000086114\_Guillardia\_theta  
94985286\_Deinococcus\_geothe  
51891890\_Symbiobacterium\_therm  
37522798\_Gloeobacter\_violac  
76259734\_Chloroflexus\_aurant  
78061400\_Burkholderia\_sp.

WADPRADYIICPSKESKFKCLEFGVSESKLIETGFPVRQKFNNTQNIKK  
WIHREVDYRFVATDHWKQVMIEIGVPAERIVETGPIRKNFSELIYNYKQ  
WITPYSTRYYVATKQDFIDVGDIDPSTVVKVGTGPIIDNKFQKQWLDNN  
WIEPDQDHFQCGTPKAVEQARALGHAERIATSGMIIRPDFRERHRHYG  
WIEEKQDQHFQCSAKAVEQARAMGHPEKSVRVSGMILNPRFRDAARRGLG  
WFQNNIEAYIVAHDIYIKRDMIECGISEDRIPTYGLPVAPEFKEQARKELS  
WSYPGVDLALPTDEAYRLMHKRGMKPSQLQRCGFPVHPKFAPTARRDLG  
WADPDALCIVPTNEAYERMLRLGMPESKLVRTGFPVHPKFRDAAQANLG  
WFSVDLDCIVPNAQVRTRALSCGLNPRQVQIVGIPVHPRFPATVRRDLG  
WFHRSVDRCFVATNLVAAQAMRLGLKSEQIACHGLPIRPSFKHELRTKLA  
WFHGGVSRICYCPSKEVAKRALVDGLDSSQIRVFGLPVVRPSFKNELRKELE  
WFHGHVTRCYCPSAEVAKRALLRGLLEPSQIRVYGLPIRPSFKDELRLKEL  
WFHGVNRCYCPSEVAKRALFDGLDESQVRVFGLPVVRPSFKDRLKEL  
WFHKLVTRCYCPSEVSKRALKAGLQPSQIKVYGLPVRPSFEDELRLREL  
WFHKLVTRCYCPSTEVAKRAQAGLETQIKVYGLPVRPSFKVELRLREL  
WFDPDADLVFVADAVRQLAIRCGVHPERIRQHGLPVRPEFRARWRRLG  
WFNKGDLKMFVPIEEMKAQALEFGLKEEQVSVCGPLRKGFKELMRDKLE  
WARPEALLMVANEEAREQMGRWRIPDANVAVTGIPIAPVYRTALREQHG  
WIWPGVARYFTASEQAARELVRGADAAAVRATGIPVRRMALRTAGPTAGS  
WINYEDVGYFLASDLTANILTKQGVDEPELLHVTGIPVKLEIARQMREHHD  
WTYTEIDGYFVGDQTRAQLIERGVSPQIVVSGIPIDPAFCREARQRRE  
WVVPNMRGYFAANDEIAWRMHARGMAPDTHVSGIPIMPAPFRACAAEFG

118063689\_Roseiflexus\_casten

WLSPRFNRYFVALEETKVHLMALGLPEDRITISGIPVDPAPFRDAALARYH  
\* : \* :

125975655\_Clostridium\_thermo  
89202509\_Bacillus\_cereus  
49483181\_Staphylococcus\_aureus  
56478620\_Azoarcus\_sp.  
116623425\_Solibacter\_usitat  
125974899\_Clostridium\_thermo  
76259735\_Chloroflexus\_aurant  
118063998\_Roseiflexus\_casten  
118062512\_Roseiflexus\_casten  
145343579\_Ostreococcus\_lucima  
18397057\_Arabidopsis\_thalia  
115475782\_Oryza\_sativa  
30687800\_Arabidopsis\_thalia  
115479239\_Oryza\_sativa  
30689152\_Arabidopsis\_thalia  
CM1391\_Cyanidioschyzon\_merolae  
GT000086114\_Guillardia\_theta  
94985286\_Deinococcus\_geothe  
51891890\_Symbiobacterium\_therm  
37522798\_Gloeobacter\_violac  
76259734\_Chloroflexus\_aurant  
78061400\_Burkholderia\_sp.  
118063689\_Roseiflexus\_casten

YTGDRPLCLIMSGEGSGNMSRIASILLKRVKIVTGRNRLKRRFLGDRV  
LSREKKILLIVAGAHGVGNVKDLCASFMSQVAVVCGKNDALQOELNSEAL  
LDPDKQITLLMSAGAFVKGFDMTITDILAQVVMICGKSKELKRSLSNENV  
LDPLRPTGVVLFGGHGSKAMLGIAKKLAEQLILFCGHNKALARQLQRAPR  
FAPAQPVGLVMFGGEGSAVMRQIARSLEDQLILICGKNTKLRERLHRAPI  
LENTLT-VLLMGGSLGIGDIENTFKSFAKQI IAVAGKNTALKKRLFPMPV  
LEPDRFTVLLTAGGVGSGRLGELVQTLQOQFLVVTGKNRALLEELRPLT  
LAPELFTVLVTSGGVGSNGMEQLVRNIHTQVLVVTGRNTALRERLFGPNV  
WRTDLVTVLISGGGAGVGPLAEIAAEDQIAVIAGRNSDLAARLWKNPV  
LDTDAPTVMLVGGEGMGKLOETAEALAQOQIVVCGRNLRLSDFLWPLKM  
IDLNLPAVLLMGGEGMGPVQKTALALGDQILVICGRNKQLASTLWKIPV  
MDPDLPAVLLMGGEGMGPVETARALSDQIVVICGRNQVLRSTLWNPV  
MDQDLRAVLLMGGEGMGPVKETAKALEEQMVVICGRNKKLASALWKPV  
MDEYLPVLLMGGEGMGPIETARALGDQILVICGRNKKLTSSLWKPV  
MDENLPAVLLMGGEGMGPIETARALADQVLIICGRNKQLSKLWKPV  
FLAEHRRVLIVGGGDGVGLTRIRARAVVEQVIVVCGRNERARNELTRTNL  
LKQDWRVVILIGGGDMGKLEKCAMSFQAQVIVICGKNEKLQQLTECDI  
LKPGEPLILVSGGGTGRALNRVNLNANQVLLVLAGAQGRGVTRV-GATI  
SSSGVRVVLVIGGGLGPIAAADVALLSRVTVICGRNEALISDARL  
LPLDAPVIALFGGGLQPRRRLMAGLLETAVVAGRNHALGTALPAMRL  
LPLDGTVITLFGGGVDDHEVRLIVSGLMQTLIVVAGRNTTLVESLPIIDL  
LDPARPTFLMSSGGAGLGLDVLARLLEQLIALAGKNKAMLASLHPGRF  
LRSDPLTLLSAGAAGIGPAREAVQQLQOQVIVVCGRNEELRAELQAKRF  
: \* . . \* . :

125975655\_Clostridium\_thermo  
89202509\_Bacillus\_cereus  
49483181\_Staphylococcus\_aureus  
56478620\_Azoarcus\_sp.  
116623425\_Solibacter\_usitat  
125974899\_Clostridium\_thermo  
76259735\_Chloroflexus\_aurant  
118063998\_Roseiflexus\_casten  
118062512\_Roseiflexus\_casten  
145343579\_Ostreococcus\_lucima  
18397057\_Arabidopsis\_thalia  
115475782\_Oryza\_sativa  
30687800\_Arabidopsis\_thalia  
115479239\_Oryza\_sativa  
30689152\_Arabidopsis\_thalia  
CM1391\_Cyanidioschyzon\_merolae  
GT000086114\_Guillardia\_theta  
94985286\_Deinococcus\_geothe  
51891890\_Symbiobacterium\_therm  
37522798\_Gloeobacter\_violac  
76259734\_Chloroflexus\_aurant  
78061400\_Burkholderia\_sp.  
118063689\_Roseiflexus\_casten

EIYGFTENIQDMLSSDIAFTRGSPNVMEAVACNVPLIITGNLPGQEEG  
KVFGYIENIDELFRVTSMTKPGGITLSEAAALQVPVILYKPVPGQENE  
LILGYTKHMNEWMASSQLMITKPGGITITEGFARCIPIMIFLNPAQGELE  
LVIEFSLDIPCYMRLADFFIGKPGPGSISEAVQOGLPVI VNAWTPQERY  
FVGEFTKEVPRYMLADYFIGKPGPGVSEALAMKLPVIVNAWTLQERY  
KIFGYTDSIPMLMDASDFIVTKPGAMTISEALVKRLPALIISPIPGQER  
HVFQFVNMEELMAASDVVVTKAGPGLMEALVMRKPVIIVTEAVGLQEHG  
RIFGFVNMEELMAASDIVISKAGPGLMEALVMRRPVIIVTQAVGMQERG  
HIFGFVP-LADMMAADIATKAGGLSVSEALAVGRPLLIFGSAPGQEGAG  
VVKGFVHNMAEYMSACDCVISKAGPGTIAEAMICGVPILVNGCIPCQEEG  
KVRGFETQMEKWMGACDCIITKAGPGTIAEALICGLPIILNDYIPGQEK  
KIRGFQMEKWMGACDCIITKAGPGTIAEALIRGLPIILNDFIPGQEVG  
KVRGFETQMEKWMGACDCIITKAGPGTIAESLIRSLPIILNDYIPGQEK  
QVKGFTKMEECMGACDCIITKAGPGTIAEAMIRGLPIILNGYIAGQ---  
QVKGFTKMEECMGACDCIITKAGPGTIAEAMIRGLPIILNGYIAGQVSR  
TVFGFVSNMGEELMAAADIVTKAGPGTIAEALIRGVPIMLSGLFLPGQEEG  
RILGFVNMEELMAAADVLVTKAGPGTIAEACCCGLPVLVDFLPGQEEG  
HALGFTTAFPELLAASDLVVGKAGGLTVAEATALGVPLVIFEPVIGQEEH  
TALGFTDQVLDHMRDALLVTKPGGITCAEALALGLPMLLLDPLPGPEE  
RSLGQIDFVDDLIAASDLVITKAGGLIASEVMARGTPMVIIVDPVIGQEE  
RVLGFVDYVDDLITASDLVITKAGGLIVSEVLARGTPMVIIDPLGHEEW  
FPQGFQQVERLMACADLVITKPGGLTSECLAMQLPMIVNSPIPGQEE  
RVLGFTDDMHVLMRIATILIGKPGGLTSEAMAAGLPMVIITAPVIGQEE  
. : . \* \* . :

125975655\_Clostridium\_thermo  
89202509\_Bacillus\_cereus  
49483181\_Staphylococcus\_aureus  
56478620\_Azoarcus\_sp.  
116623425\_Solibacter\_usitat  
125974899\_Clostridium\_thermo  
76259735\_Chloroflexus\_aurant  
118063998\_Roseiflexus\_casten  
118062512\_Roseiflexus\_casten  
145343579\_Ostreococcus\_lucima  
18397057\_Arabidopsis\_thalia  
115475782\_Oryza\_sativa  
30687800\_Arabidopsis\_thalia  
115479239\_Oryza\_sativa  
30689152\_Arabidopsis\_thalia  
CM1391\_Cyanidioschyzon\_merolae  
GT000086114\_Guillardia\_theta  
94985286\_Deinococcus\_geothe  
51891890\_Symbiobacterium\_therm  
37522798\_Gloeobacter\_violac

NPAYMQYINLGVVCKDVRKLRHTVNEILLKQSQKEFLPNVVAKEIVSFL  
NAIFYFESKGAAVVIREDAEIFEKTKALLMKEAMGSIYRPEAAHIVDVI  
NALYFEEKGFQGIADTPPEAIAKIVASLTMISTMEQDKIKYATQICQDL  
NAAVWRDNLHGLIVHGSFRITDRAVAQLLFRVSVRSIDNR-ALFEVPEIL  
NGDWLREMAGMVLPDFRGRIARAVEELLYREAAERYNNR-AIFEIPDIL  
NEQFLVNSGTAVRIYKNTKIDSVLCQVYMKEIAGNLANPDSGRNLSLI  
NIDFVLNHELGLFCPTIDRIVPVLAEMLVTARLVDAVPRDGAQIAIARVI  
NIDFVLNHELGLFCPTIDRIVPVLAEMLVTARLVDAVPRDGAQIAIARVI  
NLEYVMRRGAAQYTPDAAQFVAALQRWIAADAARSAGRPOAAFEIASMV  
NIPFVTDNKVGAISENPTIAQIVAEWLMSSRARALGRPEATFDIIRD  
NVPYVVDNAGVFTSRPKETARIVADWFMSENALKLSQPEAVFDIVKDI  
NVPYVVDNAGVFTSRPKETARIVGEWFTSDNARKLQPEAVFDIVKDI  
-----VILQSVNVV  
ECTVRGGRMWEILKITERDIEDCSGLV-----RVGDNV  
NVPFVNVHGVGEYHQGPVAIANRLAEWLMAIRARDLGKPLATYEICQDI  
NVTFFVSSGMEGFVKDITK-----  
NADYLLRHGAGLWARELTDVRAVLRALLSAHARAISVPDAADRVAAL  
NAAVLAGSAAARVGVKRLAGAADDLLFMAAARQAGHPASALAAIAAEV  
NADAAIAYGAGIQLRLPEMVAPTQVFLMRQARKYGRPTAALAVVESI

76259734\_Chloroflexus\_aurant  
 78061400\_Burkholderia\_sp.  
 118063689\_Roseiflexus\_casten

NADYVVSTGSGIQLRMCESTPRAVVNLLMRRCAQAAAHPRAALDIAEKV  
 NADFLLEQGVALKAIDDDALVYRIHALLMRRRLAPLGRPLAGRFVLDVR  
 NSDHLLLEEGVALRCNQMTTLLAYKIDRLLMRENTNRNIGRPDAARVIVETL

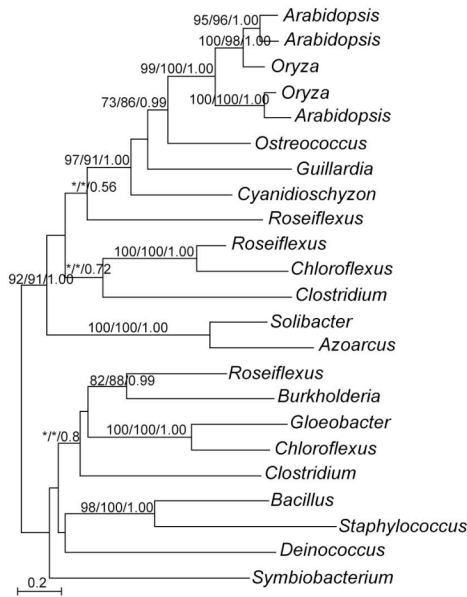

**Figure 6.** Molecular phylogeny of MGDG synthase. See text for detailed explanation. P-value = 0.235 from AU test on the presented tree. AU tests were also performed an alternative topology enforcing a monophyly of photosynthetic eukaryotic sequences with the rare cyanobacterial homolog (i.e., *Gloeobacter* in this case). P-value < 0.001 from AU test for the alternative topology.

## 7. Alpha amylase (D)

CLUSTAL X (1.83.1) multiple sequence alignment

```

CM1405_Cyanidioschyzon_merolae      YGCHPTVNFVFAIYSTEQRHMSLI IYNRMGKVWHVAVQAGYRYAWRVRGKG-
33635247_Prochlorococcus_marin      LGSTIGVNFVSAAPTAKRVELLLFHRSVDYWHVEVETGCCYGYRIFGPHH
149177467_Planctomyces_maris        LGETWAYNFVFAIYSKHAERVSLFFNKTAEIWHCRIPPATYYYAYQIEGSPD
32398065_Rhodospirillum_rubrum      LGASWSFNFSLYSRHATAVHLLLYNKSGPVVWHCRVREWAYYAYRVDGPD
33236242_Chlamydomonas_reinhardtii  LGASKRYRFALYASQATEVILALTHRGTGAIWHIEIEDQSSYAFRVHGP-S
42525620_Treponema_denticum         LGAKLGVNFVSVFSRKAKEIVLHFLFNKTGDVWHVVFVSSWAFYLYTADGEFD
19714344_Fusobacterium_nuclea       LGANLGCSPFAIYAKNVNSLSLNI FHKLGDIWSIFLEGTLYNWEING---
150017328_Clostridium_beijerin      NGAVVGVNFTHSQTATSCKLLLFYRIGNVYSMIVLEEFYAYSVDGPYN
48894542_Trichodesmium_erythrum     FGATMGVNFVSIFFSSYATSCITLVFFRIGNVYCMIVFENIEGYRMDGPN
16330244_Synechocystis_sp.          FGATIGVNFVSIYSSHSACTLVLFRRIGNVYCMVVFENIEGYRMDGPN
CM4050_Cyanidioschyzon_merolae      YGVSLGTNFVFAIYSTEQRHMSLI IYNRMGKVWHVAVQAGYRYAWRVRGKG-
22328517_Arabidopsis_thaliana       LGVSVQGINFALFSQNTSVTLCLSNKTGDTWHICVENVVLYGYRVDGPGD
15225595_Arabidopsis_thaliana       FGPTVGVNFVSVYSTNSVSATICLINRTGHVWHVFLRKDMLYGYRFDGKFD
46446740_Parachlamydia_sp.          FGANIKVNFVFAIYAKNIEKISLCLFNKTGNVWHVIAIEPYTLYAFRV----
116626210_Solibacter_usitatus       LGATLGVNFVFAIYKQAGVFLFLFARDKLVWHACVKAGQLYGYKVSGEYN
48765636_Rhodospirillum_rubrum      LGAMAGVNFVFAIYKQAGVFLFLFARDKLVWHACVKAGQLYGYKVSGEYN
24373069_Synechocystis_sp.          LGATVGVNFVFAIYKQAGVFLFLFARDKLVWHACVKAGQLYGYKVSGEYN
1707700_Sulfolobus_solfataricus     LGSNWGVNFVFAIYKQAGVFLFLFARDKLVWHACVKAGQLYGYKVSGEYN
48784580_Burkholderia_fungorum      LGASWGVNFVFAIYKQAGVFLFLFARDKLVWHACVKAGQLYGYKVSGEYN
17548459_Ralstonia_solana           LGAQWGVNFVFAIYKQAGVFLFLFARDKLVWHACVKAGQLYGYKVSGEYN
118048461_Chloroflexus_aggregatum   LGATWGVNFVFAIYKQAGVFLFLFARDKLVWHACVKAGQLYGYKVSGEYN
  
```

48763460\_Rhodospirillum\_rubrum  
58582972\_Xanthomonas\_oryzae  
58579740\_Xanthomonas\_oryzae  
26990756\_Pseudomonas\_putida  
48785916\_Burkholderia\_fungor  
21223814\_Streptomyces\_coelic  
45916433\_Mesorhizobium\_sp.  
6457937\_Deinococcus\_radiod  
48894700\_Trichodesmium\_erythr  
108803168\_Rubrobacter\_xylanoph  
25028566\_Corynebacterium\_effic  
21224411\_Streptomyces\_coelic  
21225613\_Streptomyces\_coelic  
149179477\_Planctomyces\_maris  
32446352\_Rhodopirellula\_baltic  
150020446\_Thermosipho\_melanesi  
48837599\_Methanosarcina\_barker  
116622006\_Solibacter\_usitatus  
48893487\_Trichodesmium\_erythr  
16329290\_Synechocystis\_sp.

CM1405\_Cyanidioschyzon\_merolae  
33635247\_Prochlorococcus\_marin  
149177467\_Planctomyces\_maris  
32398065\_Rhodopirellula\_baltic  
33236242\_Chlamydomonada\_pneumo  
42525620\_Treponema\_dentic  
19714344\_Fusobacterium\_nuclea  
150017328\_Clostridium\_beijer  
48894542\_Trichodesmium\_erythr  
16330244\_Synechocystis\_sp.  
CM4050\_Cyanidioschyzon\_merolae  
22328517\_Arabidopsis\_thalia  
15225595\_Arabidopsis\_thalia  
46446740\_Parachlamydia\_sp.  
116626210\_Solibacter\_usitatus  
48765636\_Rhodospirillum\_rubrum  
24373069\_Shewanella\_oneside  
1707700\_Sulfolobus\_solfat  
48784580\_Burkholderia\_fungor  
17548459\_Ralstonia\_solana  
118048461\_Chloroflexus\_aggrega  
48763460\_Rhodospirillum\_rubrum  
58582972\_Xanthomonas\_oryzae  
58579740\_Xanthomonas\_oryzae  
26990756\_Pseudomonas\_putida  
48785916\_Burkholderia\_fungor  
21223814\_Streptomyces\_coelic  
45916433\_Mesorhizobium\_sp.  
6457937\_Deinococcus\_radiod  
48894700\_Trichodesmium\_erythr  
108803168\_Rubrobacter\_xylanoph  
25028566\_Corynebacterium\_effic  
21224411\_Streptomyces\_coelic  
21225613\_Streptomyces\_coelic  
149179477\_Planctomyces\_maris  
32446352\_Rhodopirellula\_baltic  
150020446\_Thermosipho\_melanesi  
48837599\_Methanosarcina\_barker  
116622006\_Solibacter\_usitatus  
48893487\_Trichodesmium\_erythr  
16329290\_Synechocystis\_sp.

CM1405\_Cyanidioschyzon\_merolae  
33635247\_Prochlorococcus\_marin  
149177467\_Planctomyces\_maris  
32398065\_Rhodopirellula\_baltic  
33236242\_Chlamydomonada\_pneumo  
42525620\_Treponema\_dentic  
19714344\_Fusobacterium\_nuclea  
150017328\_Clostridium\_beijer

LGATWGTNFALFSAHAEKVELCLFEYTDEIWHGYLPPGQMYGYRVYGPYN  
RGAVFGTGFALFSAHATRVVEVCLFEYTNEIWHGYLPPGQRYGYRVHGPYN  
LGATWGVNFALYSRNATRVVCLFEYTDEIVHGYLPPGQLYGYRVHGPYN  
LGATWGVNFALFSANATKVELCLFEYTDEIYHGYLPPGLVYGYRVYGPYN  
LGATWGVNFALFSAHATKVELCLFEYTDEIVHGVFVPPGAVYGYRVHGPYN  
LGARFGTGFALWAGGAEAVELCLFELTHEIWHGVFVPPGQRYGYRVHGRWN  
LGATWGVNFALFSAHAEKIELCLFEYTDEIVHGYFPPGQVYGLRAYGPYN  
LGATWGTNFALYSENATGVVCLFEQTAFVWHGYLPPGQRYGYRVHGEYN  
LGSSWGTNFALFSENATSVVCLFEVSNFIWHGYLPPGQKYGFRVHGPYN  
LGATWGVNFALFSENAERVELCLFEQTDQIWHCYLPLGQLYGYRVYGPYN  
LGSKYGTNFALFSDVAESVELCLVEKDNVWHCYLPPGQRYGYRVHGPWD  
LGATYGTNFALFTEAADRVVCLLESDAFVRHAYVPPGQRYGYRVHGPYN  
LGAAYGTNFALFSEVAERVDLVVDVDFVWHCYLPPGQRYGYRVHGPWN  
YGAVPGVLFVSVRSATSMWLLLYGRLDIWTAFISPGQLYHFQADGPF  
FGATLGVQVFSVRSATSMRLLLYDRWGDVSLHVPAGQLYHFQASPWD  
LGATPGVNFALFSRHAERVILELYNKTFDGIWHIYVYHGQYVWRVDPYN  
LGATPGVNFVSIYSEHADYVELLNFNKTFFHWHVYVPRPVHYAYRIGGPF  
LGATVGVNFVFSRSASAIELLLFNRTYHYWHFVPPGQLYGYRVHGPFD  
IGATVGVNFVSIYSKNATAIELLLFNRTYHYWHFISAGQIYAYRVYGPFD  
LGATVGVNFCLFSKHAERVTLLEFNRTYHYWHFVVKAGQVYAYRVDPHD  
\* : : : : \*

--AQIVLDPFARIIDSPLYYPFAVIPPDMVIYEVHVSFTAMRGFTTAVI  
PSKVLLDPCTRAISGWDIYCLKGVVCERSVIYELHVGGSQOQTFGLGI  
SEKLLDPYSRNIYFPDFAPLSVLQSNLIIYEMHVRGFTKRRGTFAGVI  
FQKILLDPFARFVFPESFAPLGLPNDLVIYEMHVRGFTKRRGTFAGVI  
FKEYLADPYAKNIHSPQSFYAFCYLKEEMIIYEMHVSFTQSPGTFGLGI  
ENNYLLDPYARLISHSVFPKCVVVDKCVIYEAHVKGFSLRKGYSGLV  
--MAILDPYALAYTGNETIIVLARVGTDMIIYESHIGLFTKSGATYSAFE  
SSKYLDPYAKIAGQSVWQYKSRVSDLIIYELHVRGFTKRRGTFAGLA  
KSKILMDPYAKIIGGRDVWQHRGRIPYDQIIYEMHVSFTAHGTFFAAIR  
PSKVLLDPYAKVVSGRDVWQHRGRSLFDMVIYEMHVRGFTKRRGTFAGI  
SN--IVLDPYAKCVFSPSARPICGVPADLIIYELHVRGLTKQAGTYLGI  
RSILLDPYAKLVKGHSSFFAQFYGTDLVIYEMNRAFTADGGSYLGFI  
SSNILLDPYAKAISRDEFQMACMVPDLDVIYEMHVRGFTTRHPGTYQVA  
---LLIDPYAKSIYSSPDWSPGLRIIPDLIIYEMHIRGLTQDPGTLYGI  
EAKLLDPYARAVTGKFRNVKGIIVDQLVIIYEVHVKGFTAHPGTLYGFI  
PHKLLIDPAARLDGPPVVPKAVVEARLLIYEAHVKGLTRTRGTFDQVA  
PHKLLDPYARQLVGRYHMPKCKVVDQCIYEMHLKGFALRGTFAGLA  
PNKVLIDPYAKAINGSVIVPKSVVINDTVIYEVHVKGFTKLRGTYEGLA  
PHKLLDPYARALVQFRWMPKCVVIDETIVYETHVRGASMLRGTFAALA  
PHKLLDPYARLVGALRWCPKAVVTDRTVIYEMHVRGASMLRGTFAALA  
PYKLLIDPYARALAGQLRWVPRSVVDDSVIYELHVKGFTKLRGTYAGLA  
ANKLLIDPYAKSLKGEILWMPKCEVVDDETVIYEMHVRGFTMLRGTFDGLA  
HNKLLDPYARALEGLIWMKCVVVEEMVIYETHVRGFTKLRGTYAGLA  
HNKLLDPYAKQIVGELKWPMSAVIDRTVIYEAHVRLSMLRGTFSALK  
PNKLLIDPYAKQLVGLKWPCKKVIDRTIYEAHARGISMRGTFAALA  
PNKLLDPYAKAHIGELKWPCKKVDVRFVYEAHVGRGFTKRRGTFAGLG  
PAKLLDPYARAVDGDGLVPGKVVVHDSVIYELHVRGFTKLRGTYAGLA  
PNKLLIDPYAKQLLGDIRWMPKCVVTDDETVIYEAHVGMTALRGTFGGLA  
PNVVLLDPYAKALDGTQFAPLGLVVDQSVIYEAHVKGLTMRGTYAGVA  
PNKLLIDPYAKAIDGNILYMPKSVVIDESVIYELHVKGFTKLRGTYAGLA  
PNKLLDPYAKSIAGSLDWALKCRVVDDETVIYELHVKGFTKLRGTYAGLA  
ASKFLVDPYARAFVGEYDGSMSVSVVSETVIYEAHVGMTMRGTYAGLA  
SAKLLDPYARASIGEVTMTSVVNVHTVIYEAHVKGLTMRGTYAGLA  
PAKLLDPYTRAVDGLVNTMLGVVTDDETVIYEAHVRLSMLRGTYAGLA  
KRARLIDPYAKALAGNFQPPKCVVVDDETVIYEMHVRGFTNSPGTYLGI  
STARLIDPYAALAGTYQKPPKCVVDESIIYEMHVRGFTKSPGSYLGVI  
LNKLLVDPYAKAISSEDFWPTKSIVIDDETVIYEMHVRFTISRGTFLGI  
GDKVLLDPYASKG--NNKTLWSMRSVVIDETIYELHVGGFTRSSGTFSGVI  
PRKLLDPYGRGIVVPAGYAMKSVVIDRTIYELHVRGFTTRHRTYAGLI  
GTVLLDPYARIVVQEKYALKGVVVDKTVIYEMHVGGFTRHRTYAGLI  
PKVLLDPYAKAIVGKDIYALRSVVVDASIIYELHVGGFTRNRRTYAGLI  
: \*\* : : : : : ..\*\* : : : ..

EKIPYLKALGINCVFELPIFEFDELQYWGYSVAVFAPMNRFLDEFRT  
DKLPLRKLGITAIELLPFAFDPRDNYWGSPLNWFTHPKYVVRQVRE  
EKIPYLQELGITAVELLPVYQFDT--NYWGYMPLGFFAPHDGYCHIEFCE  
DKIPYLVELGVTAVELMPVQFDP--DYWGYMPLNFFAPHHAYARDEFCT  
EKIDHLHKLGINAVELLPFEFDELQYWGYSVAVFAPMNRFLDEFRT  
ELIPYKDLGITSLLELPVDFDELKNYWGSYTAFFAPKALYANFEFK  
EKIPYLKALGINAVELLPFEFDELQYWGYSVAVFAPMNRFLDEFRT  
EKIPYLKALGINAVELLPFEFDELQYWGYSVAVFAPMNRFLDEFRT

48894542\_Trichodesmium\_erythr  
16330244\_Synechocystis\_sp.  
CM4050\_Cyanidioschyzon\_merolae  
22328517\_Arabidopsis\_thalia  
15225595\_Arabidopsis\_thalia  
46446740\_Parachlamydia\_sp.  
116626210\_Solibacter\_usitatus  
48765636\_Rhodospirillum\_rubrum  
24373069\_Shewanella\_oneide  
1707700\_Sulfolobus\_solfat  
48784580\_Burkholderia\_fungor  
17548459\_Ralstonia\_solana  
118048461\_Chloroflexus\_aggrega  
48763460\_Rhodospirillum\_rubrum  
58582972\_Xanthomonas\_oryzae  
58579740\_Xanthomonas\_oryzae  
26990756\_Pseudomonas\_putida  
48785916\_Burkholderia\_fungor  
21223814\_Streptomyces\_coelic  
45916433\_Mesorhizobium\_sp.  
6457937\_Deinococcus\_radiod  
48894700\_Trichodesmium\_erythr  
108803168\_Rubrobacter\_xylanoph  
25028566\_Corynebacterium\_effic  
21224411\_Streptomyces\_coelic  
21225613\_Streptomyces\_coelic  
149179477\_Planctomyces\_maris  
32446352\_Rhodopirellula\_baltic  
150020446\_Thermosipho\_melanesi  
48837599\_Methanosarcina\_barker  
116622006\_Solibacter\_usitatus  
48893487\_Trichodesmium\_erythr  
16329290\_Synechocystis\_sp.

EKIPYLKELGVNAVELMPIYEFDELVNYWGYSTVGFAPKAGYAMDELKT  
SKIPYLQELGVNTIELMPIEFDELVNYWGYSTVNFAPKAGYAIDELKN  
EKIPYLKQLGINAVELMPCAENELCQFQWGYSPISFFAPMNRVAVREFKT  
EKIPHLQDLGINAVELLPVFEFDEMVTWGYSTVNFAPMSRYASKEFKE  
EKLDHLKELGINCIELMPCHEFNERNVFWGYSTIGFFSPMIRYAINEFKI  
EKIPYLKELGINAVELMPIYEFNELVNYFGYSTVNFSPMNRVAVLEFVK  
EKIPHLTRLGVNAVELMPVHEHYVLTNYWGYNTIGFFAPEVSYGVAEFKT  
GSIHLKHMVTALELLPVWAFADLTNYWGYNPVCLTAPHAAYGPDFRFR  
SKIDYLVKLVGNCVELLPIQAFVSLSNYWGYNSIGFFAPEPSYLIIEFRT  
SEISYKDLGITVVELMPVHFIDLTNYWGYDPIINFSPECRYSVLSFKK  
SPIDHLLKLVGTAVELLPVHAFNLNRNYWGYNSAAFFAPEPSYLLDEMRI  
DPIEHLRALGVTALELLPVHAFVQLNRNYWGYSTLAFAPAPAYLLHEMKV  
TPIAYLKLGVTALELLPVQAFITLTNYWGYQPINYFSPPEPRVAVNEFKA  
HRTDYLDLGTAVELLPVHAYVQLTNYWGYNSIGFLAPHATYLAADFKA  
QPLQYIKDLGITAVELLPVHAYLDLNRNYWGYNTIGFFALKSRVLRDFRD  
TDIDHISLGLVTALELLPVHAFVDLNRNYWGYNTLGFAPQARVMAEFKQ  
NDLKHDKDLGVSSIELLPIHAFVNLNRNYWGYNSIAFFAPHPRYLIAEFKE  
QQLDYIKNLGVTVELMPIQTFVNLNRNYWGYNTIGFFAADPRFFVGEFKE  
HPIAHLTRLGVTALELLPVHQFAHLNRNYWGYNSVGYFAPHAGYTVGEFKR  
DSIDYLVKLVGITAVELLPVQAFDLTNYWGYNTIGFFAPTTRYILHEFKR  
TPLDYLRDLGITAVELLPVHQHVDLTNYWGYSTLNFAPDVRYSVPEFKK  
HPIAYLKSLGITAVELMPIHFFLRLSNYWGYDSINYFAPYSGYSVPEFKQ  
SAIEHLKRLGVTALELMPVHFFVDLNRNYWGYNSIGFFAPDARYSINEFKT  
HPIEYLVDLGITAVELMPPVHQFQLNRNYWGYNTIGFFAPQONDYSVAEFKA  
HPIEHLTGLGVTALELMPVHQFVNLNRNYWGYNTVGFAPHNAYAVLEFKE  
HPVDHLTSLGVTALELMPVHQFVHLSNRNYWGYNTIGFFAPHNGYVLEFKE  
EKIPYLIDLVGTAVELMPIHEFPMHQYWGYYETLAFAPHRGFVAVREFKE  
EKIPYLKSLGVTVELMPPVHEFPIRPNYWGYDPMMAFFAPHRGYAVNEFKQ  
EKLDHLKELGVTIELMPPVFEFNVLDKDVWGYNPLGFFAVTGNYSVLFKFD  
DKIPYLKELGITAVELMPPVDFDDRQYWGYYDPICFAPHSYGMEEFRD  
EKIPYLHDLGITAVELMPPVQFDPHCNYWGYAPVSFFAPHQYSLNEFRD  
EKIPYLKELGITAVELLPVQFQDELINWGYSQIAFFAPPHHSYSMDEFRD  
EKIPYLKELGITAVELLPVHYFDPLTNYWGYSTIGFFAPHQGYSVDFR  
: : \* : . : \* : \* : \* : : \* : \* : : \* : : .

CM1405\_Cyanidioschyzon\_merolae  
33635247\_Prochlorococcus\_marin  
149177467\_Planctomyces\_maris  
32398065\_Rhodopirellula\_baltic  
33236242\_Chlamydomonas\_pneumo  
42525620\_Treponema\_dentic  
19714344\_Fusobacterium\_nuclea  
150017328\_Clostridium\_beijer  
48894542\_Trichodesmium\_erythr  
16330244\_Synechocystis\_sp.  
CM4050\_Cyanidioschyzon\_merolae  
22328517\_Arabidopsis\_thalia  
15225595\_Arabidopsis\_thalia  
46446740\_Parachlamydia\_sp.  
116626210\_Solibacter\_usitatus  
48765636\_Rhodospirillum\_rubrum  
24373069\_Shewanella\_oneide  
1707700\_Sulfolobus\_solfat  
48784580\_Burkholderia\_fungor  
17548459\_Ralstonia\_solana  
118048461\_Chloroflexus\_aggrega  
48763460\_Rhodospirillum\_rubrum  
58582972\_Xanthomonas\_oryzae  
58579740\_Xanthomonas\_oryzae  
26990756\_Pseudomonas\_putida  
48785916\_Burkholderia\_fungor  
21223814\_Streptomyces\_coelic  
45916433\_Mesorhizobium\_sp.  
6457937\_Deinococcus\_radiod  
48894700\_Trichodesmium\_erythr  
108803168\_Rubrobacter\_xylanoph  
25028566\_Corynebacterium\_effic  
21224411\_Streptomyces\_coelic  
21225613\_Streptomyces\_coelic  
149179477\_Planctomyces\_maris  
32446352\_Rhodopirellula\_baltic  
150020446\_Thermosipho\_melanesi  
48837599\_Methanosarcina\_barker

MVRELHRAGIAVILDIVFNHTAETWK--TYHFRALANREYYLHDHNDVN  
LVAACHDEGIEVILDVVYNHTTEGSDIGTSLWRGFSALYYHQNDGEYLD  
MVKALHRAGIEVIDVVYNHTGEGNENGTYSFKGIDNTYYSLTGSQFAN  
MVKALHAAGIEVILDVVYNHTCEGGHRTYCKWGIDSSSTAYMGTGAPYAN  
LVKTLHQEGIEVILDVVFNHTG---LQGTCSLPWIDTPSYIILDAGHFTN  
MVREFHRAGIEVIDVVFNHTAEGNENGVFSFKGFDNSIYYHLEDYKYN  
LIFSLHKNIEVILDVVYNHTAEGGTGGVYNFKAMGENIFYTKDRNYFTN  
LIKKEFHEDGIEVILDVVFNHTAEGNEGYISFKGFDNNVYMLTPGKYFN  
LVKDLHKNIEVILDVVFNHTAEGNENGTISFRGIDNKTYMLTPGYFFN  
LVKELHKGIVSILDVVFNHTAEGNERGTISFRGLDNKTYMLTPGYFFN  
MVRELHRAGIEVILDVVFNHTGEGDGGFYHFKGLALSTYYILDRNQFAN  
MVKALHSAGIEVILDVVYNHTNEADDKYTTSFRGIDNKVYMLDPNQLLN  
LVKEAHRGIEVIMDVVFNHTAEGNEKGFISFRGVDNSVYMLAPGEGYN  
MVKELHRGIEVILDVVYNHTFEGNQMGIQSFRGLDKHAYYMLDEFYLN  
LVRELHRAGIQVILDVVYNHTAEGNEMGSMFRGLDNVSYCLTGRYYMN  
MIDCLHGADIAVILDVVFNHTSCEGDEYGTLSFRGLDNAAAYRLDPRYLN  
MVDALHGAGIEVILDVVYNHTSCEGDEYGTLSFRGLDNAAAYRLDPRYLN  
MVNELHNAGIEVIDVVYNHTAEGNHLGTLNFRGIDNTAYYMLQPRYLD  
AVRQLHAAGIEVILDVVYNHTCEGNELGTLNFRGLDNASYYRLIPRHIN  
AIRRLHAAGIEVILDVVFNHTCEGNELGTLNFRGLDNASYYRLVPRYLN  
MVKALHAAGIEVIDVVYNHTGEGNHLGTLNFRGIDNASYYRLVPRYLD  
FVQKMHADAGLEVILDVVYNHTAEGNHLGTLNFRGIDNRSYYLMLGRHYNN  
MVKAMHQGLEVILDVVYNHTAEGSELGTLNFRGIDNASYYRLAERYYN  
MVARLHAGLEVILDVVYNHTAEGNHLGTLNFRGIDNASYYRLADRFYIN  
MVAHLHDAGLEVILDVVYNHTAEGNERGTLNFRGIDNASYYRLMPRYYN  
MVDRFHANNLEVIDVVYNHTAEGNERGTISFKGIDNASYYRLMPRYYN  
MVRALHAAGIEVILDVVYNHTAEGAGELGTLNFRGIDNRSYYRLQPRYLD  
MVRKLHEAGIEVILDVVYNHTAEGNHLGTLNFRGLDNASYYILGDRYYD  
MVRALHDAGIEVILDVVYNHTAEGNMGTLNFRGIDNPTYYRLVARYFD  
MVKALHNGGIEVILDVVYNHTGEGNHLGTLNFRGIDNASYYRLVRYYMD  
MVKRLHAGLEVILDVVYNHTAEGNHLGTLNFRGIDNASYYRLVPRYMD  
MVRSFHEAGIEVILDVVYNHTAEGNMGTLNFRGIDNEAYYRLVDRHYMD  
AVKALHEAGIEVILDVVYNHTAEGNHLGTLNFRGIDNRSYYRLADRYMD  
MVKTLHEAGLEVILDVVYNHTAEGNERGTLNFRGIDNASYYRLVDQHYD  
MVRALHAGIEVILDVVFNHTAEGNENGTLSFRGLENQVYYHLDQKYKN  
MVKALHSAGIEVILDVVFNHTCEGNEQGLTSLFKGLENQVYYILSEQHYCN  
FVKELHKNFEVILDVVYNHTGEGNHLGTLNFRGIDNEIYYMLNPRYLN  
MVRALHAGIEVILDVVFNHTAEGDNLGVFSFKGIDNSIYYLLEPQYYSN



48785916\_Burkholderia\_fungor  
21223814\_Streptomyces\_coelic  
45916433\_Mesorhizobium\_sp.  
6457937\_Deinococcus\_radiod  
48894700\_Trichodesmium\_erythr  
108803168\_Rubrobacter\_xylanoph  
25028566\_Corynebacterium\_effic  
21224411\_Streptomyces\_coelic  
21225613\_Streptomyces\_coelic  
149179477\_Planctomyces\_maris  
32446352\_Rhodopirellula\_baltic  
150020446\_Thermosipho\_melanesi  
48837599\_Methanosarcina\_barker  
116622006\_Solibacter\_usitatus  
48893487\_Trichodesmium\_erythr  
16329290\_Synechocystis\_sp.

DSCRQDPVLSVRLVAEPWDCGGYQVGGFPPGWAEWDRFRDTRVREYWK  
AVIAQDPVLRVVKLIAEPWVGGYQVGAFFPLLWTEWDRYRNAVDRDFWR  
DTRVQDPVLSRVVKLIAEPWDLGDYQLGNFPPGGEWNGAYRDWVRSFWR  
TIHQDPVLSQVVKLIAEPWVGGYQVGNFVNWAEWNGIYRDDMRFSWK  
DIVHQDPVLSNVVKLIAEPWVGGYQVGNFPLLWSEWNGKYRDTVRDFWR  
DIHQDPVLSQVVKLIAEPWVGGYQVGNFVGVTEWNGKYRDAVRSYWK  
DLVQDDPVVSQVVKLIAEPWVGGYQVGNFPLLWTEWNGKYRDTVRDFWR  
DLVQDDPVVSQVVKLIAEPWVGGYQVGNFPLLWTEWNGKYRDTVRDLWR  
DLIQDDPVLSRVVKLIAEPWVGGYQVGNFPLLWSEWNGKYRDAVDRDFWR  
EAIADPDLADTKLIAEAWDAAGAYQVGSFIRWAEWNGRYRDIRRFWR  
ELIADPMLADTKIAEAWDAAGAYQVGSFGHRWAEWNGRYRDDRDFWR  
KDISDPILHNLKLIAGWDAAGGYFLGEPQGWAEWNGKYRDIRKFFWR  
WQIELDLAGYKVIKIAEAWDAALNQGVPYPPRWAEWNGYRDIRRFWR  
WDIECDVAVLGTCLIAEAWDAAGLYQVGSFIDSWREWNGRFRDIRAFWR  
WAIESDPVLAGTKIAEAWDAAGLYQVGSFIDRFAEWNGHYRDDRDFVVK  
WAIESDPILAGTKLIAEAWDAAGLYSVGKFDVWFAEWNGPFRDDVRRFVK

. : .:\* \*\* . \*\* \*:

CM1405\_Cyanidioschyzon\_merolae  
33635247\_Prochlorococcus\_marin  
149177467\_Planctomyces\_maris  
32398065\_Rhodopirellula\_baltic  
33236242\_Chlamydomyces\_pneumo  
42525620\_Treponema\_dentic  
19714344\_Fusobacterium\_nuclea  
150017328\_Clostridium\_beijer  
48894542\_Trichodesmium\_erythr  
16330244\_Synechocystis\_sp.  
CM4050\_Cyanidioschyzon\_merolae  
22328517\_Arabidopsis\_thalia  
15225595\_Arabidopsis\_thalia  
64446740\_Parachlamydia\_sp.  
116626210\_Solibacter\_usitatus  
48765636\_Rhodospirillum\_rubrum  
24373069\_Shewanella\_oneide  
1707700\_Sulfolobus\_solfat  
48784580\_Burkholderia\_fungor  
17548459\_Ralstonia\_solana  
118048461\_Chloroflexus\_aggrega  
48763460\_Rhodospirillum\_rubrum  
58582972\_Xanthomonas\_oryzae  
58579740\_Xanthomonas\_oryzae  
26990756\_Pseudomonas\_putida  
48785916\_Burkholderia\_fungor  
21223814\_Streptomyces\_coelic  
45916433\_Mesorhizobium\_sp.  
6457937\_Deinococcus\_radiod  
48894700\_Trichodesmium\_erythr  
108803168\_Rubrobacter\_xylanoph  
25028566\_Corynebacterium\_effic  
21224411\_Streptomyces\_coelic  
21225613\_Streptomyces\_coelic  
149179477\_Planctomyces\_maris  
32446352\_Rhodopirellula\_baltic  
150020446\_Thermosipho\_melanesi  
48837599\_Methanosarcina\_barker  
116622006\_Solibacter\_usitatus  
48893487\_Trichodesmium\_erythr  
16329290\_Synechocystis\_sp.

GDTGMIQEMATRICGSEDIYAYGINFITCHDGMSLRDLVSYNDANQNWANG  
GDEDSAWRMGQRLSGSADLYGRSLNFI TAHDGFTLNDLVSNRKHNLANG  
GDEGQIADLMTRLYGSSDLFYQSINYITSHDGFSLYDMVSNQKRNWANG  
GDCGMVSDLMTRLYGSCDLFQLSVNYITSHDGFSLYDLTAYNEKRNWANG  
GDQNLIGTFASRISGSQDIYTNISINYVSCHDGFTLCTDTVYTNHKKNEANG  
QPNPDIRHLATRVTSADLYQSFVFCCHDGFSLYDLTAYNEKRNWANG  
GDFGQVPELIIKRIFGSVDIFQSSINFICCHDGFSLYDLTAYNEKRNWANG  
GDSGLAATVLAERITGSYDLYNASVNFITCHDGFSLYDLTAYNEKRNWANG  
GDC-TVGEMAQRIQGSPLYATSINFITAHDGFTLADLVSYNDKHNANG  
GDAGVIGEMAQRLQGSPLYSTSINFVTAHDGFTLADLVSYNGKHNANG  
GDPHLIGDFATRLCGSEDLYHWSINFVTAHDGFTLADLVSYAEKHNANG  
GDSGMKGSFATRVSGSSDLYYHGVNFVIAHDGFTLADLVSYNGKHNANG  
GTDGFSGAFACECLGSPNLYWHSINFICAHDGFTLADLVSYNGKHNANG  
GTSNGHTAFATLALSGSADLYCCSINFITAHDGFTLADLVSYNGKHNANG  
AN-GRSGDLAVALAGCAARYRAGVSYISAHDGFTLADLVSYNGKHNANG  
GDHGMLEPFARFHFSGDFFAASINFITSHDGFSLYDLTAYNEKRNWANG  
GEALPYSEIANRLLGSPDIYFASINYVTSHDGFTLADLVSYNGKHNANG  
48784580\_Burkholderia\_fungor  
17548459\_Ralstonia\_solana  
118048461\_Chloroflexus\_aggrega  
48763460\_Rhodospirillum\_rubrum  
58582972\_Xanthomonas\_oryzae  
58579740\_Xanthomonas\_oryzae  
26990756\_Pseudomonas\_putida  
48785916\_Burkholderia\_fungor  
21223814\_Streptomyces\_coelic  
45916433\_Mesorhizobium\_sp.  
6457937\_Deinococcus\_radiod  
48894700\_Trichodesmium\_erythr  
108803168\_Rubrobacter\_xylanoph  
25028566\_Corynebacterium\_effic  
21224411\_Streptomyces\_coelic  
21225613\_Streptomyces\_coelic  
149179477\_Planctomyces\_maris  
32446352\_Rhodopirellula\_baltic  
150020446\_Thermosipho\_melanesi  
48837599\_Methanosarcina\_barker  
116622006\_Solibacter\_usitatus  
48893487\_Trichodesmium\_erythr  
16329290\_Synechocystis\_sp.

.. : ... \*\*\* :: \* :: . \* \*

CM1405\_Cyanidioschyzon\_merolae  
33635247\_Prochlorococcus\_marin  
149177467\_Planctomyces\_maris  
32398065\_Rhodopirellula\_baltic  
33236242\_Chlamydomyces\_pneumo  
42525620\_Treponema\_dentic  
19714344\_Fusobacterium\_nuclea  
150017328\_Clostridium\_beijer  
48894542\_Trichodesmium\_erythr  
16330244\_Synechocystis\_sp.  
CM4050\_Cyanidioschyzon\_merolae  
22328517\_Arabidopsis\_thalia

EDNRDGEKHNLSWNCVGEGETDDENVLRLRRQRNFFLILCSARVPMI  
ECNRDGENHNNSWNNIEGPCSDHAVQALRHRQMRNLATLLLSRQVPMI  
QHNEDEGT-HDYSWNCWEGSDAPEDILKLRKQVKNFLLMLVSNGTMPM  
NNNTDGA-LEYSWDCWEGDGTPEILQLRKQVNRNFCLLMLVSNGTMPM  
EDNRDGTANYSYNFTEGKTEDEPGILEVRERQLRNFLLMLVSNGTMPM  
ENNRDGENNLSYNHGIEG-SASVEIERMRMRSAKNILTTLLSAGTPMI  
ENNDGGENNLSYNHGIEGFTENPHIISLRKQIKNMLILYISQGIPLM  
WNNTDGENNNSWNCVGEGETDDENIKLRRKLIKACAVLLSSQAPML  
ENNDGANDNESWNCVGEGETDDENIPGIALRSRQMRNAIIMVSVQVPMI  
ENNDGANDNYSWNCVGEGETDDENIPGIALRSRQMRNAIIMVSVQVPMI  
EENQDGEHNSWNCVGEGETDDENIPGIALRSRQMRNALLISTGTPMV  
EGNDGANDNHSWNCVGEGETDDENIPGIALRSRQMRNALLISTGTPMV



15225595\_Arabidopsis\_thalia  
46446740\_Parachlamydia\_sp.  
116626210\_Solibacter\_usitatus  
48765636\_Rhodospirillum\_rubrum  
24373069\_Shewanella\_oneide  
1707700\_Sulfolobus\_solfat  
48784580\_Burkholderia\_fungor  
17548459\_Ralstonia\_solana  
118048461\_Chloroflexus\_aggrega  
48763460\_Rhodospirillum\_rubrum  
58582972\_Xanthomonas\_oryzae  
58579740\_Xanthomonas\_oryzae  
26990756\_Pseudomonas\_putida  
48785916\_Burkholderia\_fungor  
21223814\_Streptomyces\_coelic  
45916433\_Mesorhizobium\_sp.  
6457937\_Deinococcus\_radiod  
48894700\_Trichodesmium\_erythr  
108803168\_Rubrobacter\_xylanoph  
25028566\_Corynebacterium\_effic  
21224411\_Streptomyces\_coelic  
21225613\_Streptomyces\_coelic  
149179477\_Planctomyces\_maris  
32446352\_Rhodopirellula\_baltic  
150020446\_Thermosipho\_melanesi  
48837599\_Methanosarcina\_barker  
116622006\_Solibacter\_usitatus  
48893487\_Trichodesmium\_erythr  
16329290\_Synechocystis\_sp.

CM1405\_Cyanidioschyzon\_merolae  
33635247\_Prochlorococcus\_marin  
149177467\_Planctomyces\_maris  
32398065\_Rhodopirellula\_baltic  
33236242\_Chlamydomonas\_pneumo  
42525620\_Treponema\_dentic  
19714344\_Fusobacterium\_nuclea  
150017328\_Clostridium\_beijer  
48894542\_Trichodesmium\_erythr  
16330244\_Synechocystis\_sp.  
CM4050\_Cyanidioschyzon\_merolae  
22328517\_Arabidopsis\_thalia  
15225595\_Arabidopsis\_thalia  
46446740\_Parachlamydia\_sp.  
116626210\_Solibacter\_usitatus  
48765636\_Rhodospirillum\_rubrum  
24373069\_Shewanella\_oneide  
1707700\_Sulfolobus\_solfat  
48784580\_Burkholderia\_fungor  
17548459\_Ralstonia\_solana  
118048461\_Chloroflexus\_aggrega  
48763460\_Rhodospirillum\_rubrum  
58582972\_Xanthomonas\_oryzae  
58579740\_Xanthomonas\_oryzae  
26990756\_Pseudomonas\_putida  
48785916\_Burkholderia\_fungor  
21223814\_Streptomyces\_coelic  
45916433\_Mesorhizobium\_sp.  
6457937\_Deinococcus\_radiod  
48894700\_Trichodesmium\_erythr  
108803168\_Rubrobacter\_xylanoph  
25028566\_Corynebacterium\_effic  
21224411\_Streptomyces\_coelic  
21225613\_Streptomyces\_coelic  
149179477\_Planctomyces\_maris  
32446352\_Rhodopirellula\_baltic  
150020446\_Thermosipho\_melanesi  
48837599\_Methanosarcina\_barker  
116622006\_Solibacter\_usitatus  
48893487\_Trichodesmium\_erythr  
16329290\_Synechocystis\_sp.

EENNDGENHNYSWNCGEEGDFASISVKRLRKRQMRNFFVSLMVSQGVPMI  
EENRDGFDHNSWNCGIEGHSNNKIVALRERQIRNFFLLALLVSOQIPMI  
ENNQDGTNDNNSWNCGAEEDTDSGLLSLRRQLMRNHACYLMFACGTPMM  
ESNRDGSIAELSANHGVEGPTNDLAIRSLRDRQRNLLACLLLSLGVPMI  
EENRDGHHANFZYHYGVGASNDVSVLVLRARQQRNLLTTLFSLQGVPMI  
FNNQDGMNENYSWNCGAEPTNDQNVVICREKQKRNFMITLLVSOQTPMI  
EDNNDGHNENSRNWGVEGESDDPAILATRKRVARSLIATLLMALGTPMV  
EDNRDGHHDNCSANWGVGPTDDAAILAQRARVARALLATVLLSNGTPML  
EENRDGSHNNSWNCGVEGPTDDPDIRALRLRQMMNFATLLFSLQGVPMI  
EDNRDGSDDNNSWNCGAEPTDDEEINTLRRRQMRNMLATLLSOGTPML  
EDNRDGSNDGSCNYGEEGETDPAEILQIRERQMKNLLATLLSOGAPMM  
EDGRDGSDHNISCNYGVEGETNDPTIKQLRRQMRNLLATLLSOGTPML  
ENNQDGTNDNLSWNCGVEGPTDDPAINALMRQMRNYFATLLLAQGTPI  
EDNKDGHSDNKSWMGVEGPTDDPDIRQQRERQKRNLATLLSOGTPMI  
EGNRDGTNDNRSWNCGTEGETDPAQVRLRRQLRNLTTLLSTGVPMI  
EDNRDGHSDNRSWNCGAEPTDDEETIKALRAKMRNNAIATLLSOGTPMV  
EGNNDGHNHNITWNCGVEGPTDDPEINRLRQMRNMLATLLSOGTPMI  
EDNNDGSKHNSWNCGEEGETNDPEILSLRNRQRNLFVTLMLSQGVPMI  
EDNRDGHDDNRSWNCGVEGPTDGRGIRRLRARQKRNLATLLSOGVPMI  
EDNRDGS SHNRSWNCGVEGPTDDPEILQLRAQRNLFVTLMLSQGVPMI  
EDNRDGHSHNRSWNCGVEGPTDDPAVLELRARQMRNFATLLSOGVPMI  
EDNRDGTNDNRSWNCGAEGETDPAVRELRGRQRNLFVTLMLSQGVPMI  
EDNQDGENNNISMNFGVEGPTDDPAIIGMRERQIKNMLATLLSOGVPMI  
EDNNDGDNHNISDNYGVEGPTDDEETIKALRAKMRNNAIATLLSOGTPMV  
EDNRDGTNENFSYHGVGVEGETDDEPKIKIRKQVKNFITILMISHGTPMI  
ENNRDGIENLLSWNCGVEGETDDEVEVTLRERQIKNFAAILLSIGVPMI  
ESNRDGCNDNRSWNCGVEGPTDDEPEIENLRNRQIKNFLTITLLSLGVPMI  
EDNRDGANHNFSWNCGIEGTTDQEEIEMLRRLRQIKNFITLFFSOQTPMI  
EKNRDGTNDNFSWNCGVEGPTDDPKINQLRLRQIKNFLTILFFSOQTPMI

. \*\* : : . \* \*\* : \* :

RSGEIIGHTQRGNSNVWCQDNELNYLHWFVSTLVHFRKLTAPIWRRF  
LMGDEFLRSQGGNNNSWCQDNLPLGWLWHLFVSLMLIRHQLSEFSPV  
RMGDEFLQTOGGNNNPYNQDNETSWLDWMFRFVKLLIAFRKTHSSLCRSH  
RMGDEFLQTOGGNNNPYNQDNETSWLDWIFNFVREVISFRKSHSPISRSR  
QSGDEYAHTAEGNNNRWALDSNANYFLWLMHFLCDLIAFRKKYKTLFNRG  
NMGDEVFTRQGNNNAYCQDNEMSWFDWLEFVKLLINLRKTHPSFLRKH  
LMGDEMGRTOQGNNNAYCQDNPTTWVDWVFLFTKNMNLNRKSYSIFKKT  
LSGDEFNTQFGNNNPYCQDNEISWLNWLFVFKNMIFNRKHPAIDRI  
LMGDEIGRSKNGNNNYCHDSELNWNWLFVFKNCVAFRKAHPILKNQ  
LMGDEVFTRQGNNNAYCQDSEPFNWNWLFVFKHCAIAFRKTHPSFLRKH  
LMGDEYGHTRRGNNNAWCQDNELNYMDWLVRFVRLMILFRVNTFLCRQ  
LMGDEYGHTRYGNNNYGHDTSLNFFQWHFRFSEVIKFRSHHVLKHN  
YMGDEYGHTKGNNNYCHDNMNYFRWFRFRFRILIKFRDECESLGLND  
LMGDEVFTRQGNNNAYCQDNKLNWFLWVFRFVKLLITFRKTHPSFLRKH  
LGGDEFARSQGGNNNAWCQDNAIGWFDWLVFVFRKAIATRFRFPVLQRK  
RGGDELQTOGGNNNPYCQDNPLNWLWFAAFARAGALRALPQLGRAS  
LSGDETRTOGGNNNAWCQDNPMNWFVWLLSFTQQLIALRKRFPPLCAKR  
LGGDELSTQRGNNNAYCQDNEITWFDWLFVFKKMIYFRKTHPSFLRKH  
LAGDESLRTOHGNNNAWCQDNELSWLDWMTAFVARVIALRKHQHPLLRETR  
LGGDEFGRTOGGNNNAWCQDNAISWLDWLFAYTARLIALRKTSPALRWP  
LAGDEFARTQGGNNNAWCQDNPISWVDWLLAFTRRLIAFRKTHPSFLRKH  
LAGDEFANSQGGNNNAWCQDNALSWLDWQIAFVTSLLRLRREHVVFHRT  
LSGDERGTOGGNNNPYCQDNAITWLDWLTDFVKALTKLRKRYPILSRGR  
LAGDEFHSGQGNNNAYCQDNELTWLDWQAAFVRLRIRIRORYPLLRHR  
VAGDEFSTRTOHGNNNAWCQDSEIGVWNWLLAFVVKLLTRRLRYPVLRRSR  
LAGDEFGRTOQGNNNAYCQDNEISWVDWLEFVVRNLTTLRHLRPLVLRGR  
VAGDEMGRTOQGNNAWCQDNETGWVDWLFALASRLIGLRHRPVLRRR  
LMGDEVGRTOQGNNNAYCQDNEINWLAFLQFVRLIAYRRAHPRLRLKN  
LGGDEFGRTOGGNNNAWCQDNDISWVDWLLAFTRKLIARLKRHPSLHRK  
LGGDEFGRTOQGNNNAYCQDNEISWVWLLDFTRRELIYFRFQHPVYRRK  
LHGDEMGRTOQGNNNAYCQDNETSWVSWFLAFVRRMIRLRREHPIFRRS  
SHGDEMARTQGNNNAYCQDNELAWNWLLSFTRRLRIRAEHPVFRRR  
SHGDEFARTQGNNNAYCQDNELAWWLLSFTRAMVWLRKDHVPLRRR  
CHGDELGRTOQGNNNAYCQDNEISWIDWLLDFARRLIALRADHPVLRRR  
LSGDECRTOQGNNNAYCQDNAISWFDWLYRFCKELIHFRLEPTLRQKN  
VSGDEARTQGNNNAYCQDNDISWFDWLVRFVSLIDFRKNQPTIRRE  
LMGDEIYRTOYGNNNAYCQDNEKTWLDWIFRFFKMIEFRKHHALRRR  
CMGDEVRRTOQGNNNAYCQDNETSWFDWVFRFVKLLMIDFRKHTTILRPR  
VMGDEVRRTOQGNNNAYCQDNETSWFDWVFRFVKLLIARLLRQIDSDRT  
LMGDEVRRTOQGNNNAYCQNNKSSWFDWLLRFVKKIHFHTQELQDLDK  
LMGDPVGRTOQGNNNAYCQDNELSWFDWETHFRGIALTQSLFLQLES

\*\* . : \* . \* : : \*

|                                 |                                         |
|---------------------------------|-----------------------------------------|
| CM1405_Cyanidioschyzon_merolae  | LLYIAFNASHACDITAPWAVLFNTAHMEPYSAVLMV    |
| 33635247_Prochlorococcus_marin  | NMWMGFNAYSAMHFDLPWHRLLDTADLQNHSMILL     |
| 149177467_Planctomyces_maris    | FIYVMINAAANTCCFGIHWKCVVDTADVQARSVVVLI   |
| 32398065_Rhodopirellula_baltic  | FIYVMINAGRDSVEFGIQWRLAIDTSNVNARSICVLV   |
| 33236242_Chlamydomyces_pneumo   | FVYVAFVHGAQDQLATLPYQIVAESQSLQPHHTLIAI   |
| 42525620_Treponema_dentic       | FFYVMTNSYNNDITVRLPWHRLIDTSVVLRSRTVVLI   |
| 19714344_Fusobacterium_nuclea   | PFYIAFNASYTEQLCFELPWYIILDTSTCVLPKSSVILI |
| 150017328_Clostridium_beijer    | EVYLCINAHWETQYVRLPWRIAVNTSEIEPRSVMLIV   |
| 48894542_Trichodesmium_erythr   | HIYVAMNMHWDSLWFNIPWHIFVNTALLGDRSIVILV   |
| 16330244_Synechocystis_sp.      | HIYVAMNMHYESLWFELPWHVVFANTGLIGDRSVVILL  |
| CM4050_Cyanidioschyzon_merolae  | FLLVGFNAGPERRTVTVPWLRIVDTNVMQPWSSIILO   |
| 22328517_Arabidopsis_thalia     | FIYVAFNAHDYFVKALIPWFRVADTNNVAPFSSILLQ   |
| 15225595_Arabidopsis_thalia     | FIYVAFNTSHLATLVSLPWEFVDTSPMLSYSSIIILL   |
| 46446740_Parachlamydia_sp.      | FLYVAFNASHVVLTVTIPWVVLVNTHKIPSYTSIALK   |
| 116626210_Solibacter_usitatus   | FLFFILNSDFDSQWVKLPWFRAIDTSIANARSTVVLL   |
| 48765636_Rhodospirillum_rubrum  | FLLVVLINGQPHEQSFRLPWTIALRSVAVPEMSLVALT  |
| 24373069_Shewanella_oneide      | FLLLMVNADEHPLAFPPWQCLLHTQLLQDRSLMLFH    |
| 1707700_Sulfolobus_solfat       | YFLIILNANPNNVKVKFPWELVISSYEIEGRALVYR    |
| 48784580_Burkholderia_fungor    | FLLMMLNANEKTLRFTPPWHVLLDTAKPGPQHGPRLL   |
| 17548459_Ralstonia_solana       | FALTILINGAAADLIPTLPWLLAIDSARVQGRSVVLLL  |
| 118048461_Chloroflexus_aggrega  | FLLVVLVNAAGNEVFPFLPWHVVIDTAHKPRALAVLI   |
| 48763460_Rhodospirillum_rubrum  | FLLVVLNASHTEVVFTLPWETVIDTMALPGRSLQVLR   |
| 58582972_Xanthomonas_oryzae     | FLLIVINAYHEGVSFTLPWKLVLSTDLAPPRSVSVFE   |
| 58579740_Xanthomonas_oryzae     | FLLMLINAASTSVSFTLPWRVLVDTAKASAHSLTLLA   |
| 26990756_Pseudomonas_putida     | FVLLIVNAHHDIVPFKLPWCLVDTDEVKGRSMLLMV    |
| 48785916_Burkholderia_fungor    | FLLVVLNNAHHDVVNFTLPWTCLLDNTQVTARSLLLLA  |
| 21223814_Streptomyces_coelic    | FFLAVLHAGGEPAGFVLPYEVVVDGTVPARTVLLLR    |
| 45916433_Mesorhizobium_sp.      | FILLILINGFHEPLGFSLPWKMMRTDELADRSMVVLE   |
| 6457937_Deinococcus_radiod      | FLLLLLSSSYVDLPPKMPWDLLEDTSVTLRGRSVKLYR  |
| 48894700_Trichodesmium_erythr   | WFMIFFNAYHELIEFTIPWVIIIDTSPVMEHSIVVLQ   |
| 108803168_Rubrobacter_xylanoph  | FFLLLLNAHHEDLSFVLPWEAVVDTPALKARSMVLA    |
| 25028566_Corynebacterium_effic  | FFILMFNAHHEAIDFTLPWKLVDTTVTPARSSMLLR    |
| 21224411_Streptomyces_coelic    | FFLLMFNAAPRLDFVVPWEVVVDVTLLDRSLTVLQ     |
| 21225613_Streptomyces_coelic    | FFLLLLNSHWEPADFRLPWTALVDTATVEQSLVLLS    |
| 149179477_Planctomyces_maris    | FLMILVNSSDPQAFELPWNLIDTSVLPPLRSLRCYV    |
| 32446352_Rhodopirellula_baltic  | YVILMFNSTGDHREFHFPWNLFVDTAEVGRHSMRIYV   |
| 150020446_Thermosiphon_melanesi | FIFVILNQWIEPLQFTLPWYRVVDTSIAQPKSSVLI    |
| 48837599_Methanosarcina_barker  | YIHVLMNMYWEPLFEFELPWYRAVDTFIVQGRSVVLI   |
| 116622006_Solibacter_usitatus   | TFHMIFNSWWQPLDFELPWRRWIDTAHAAPRSVVVLI   |
| 48893487_Trichodesmium_erythr   | VFHIMLNAYWKPLMFELPWYLI VNTARLEPRAAVILM  |
| 16329290_Synechocystis_sp.      | LLHLIFNAYWEPLNFELPWHRLVDITYVWQPRSSVVLV  |

:

**Note:** Top hits in GenBank searches (using *Cyanidioschyzon* and *Arabidopsis* sequences) are from chlamydiae and cyanobacteria. The *Arabidopsis* sequences are annotated as chloroplast precursors.

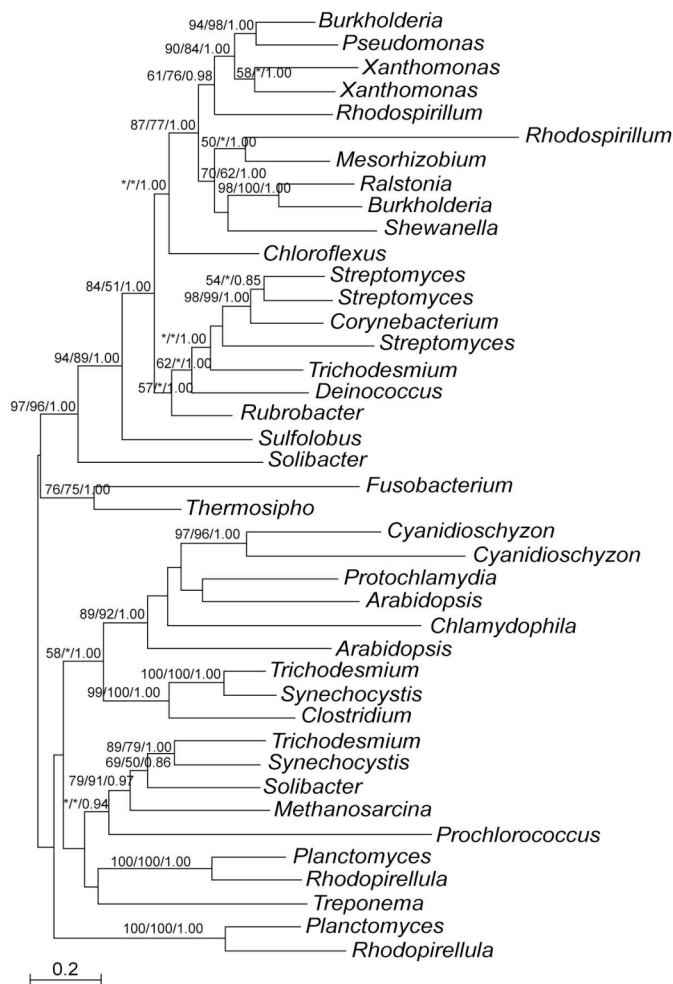

**Figure 7.** Molecular phylogeny of alpha amylase. P-value = 0.983 from AU test for the presented gene tree. AU tests were also performed on alternative topologies, including (A) monophyly of red algal and green plant sequences with different copies of cyanobacterial homologs, and (B) monophyly of red algal, green plants, cyanobacterial, and chlamydial sequences. These tests investigate if red algal and green plant sequences are plastid-derived and if red algae and green plants acquired the gene from plastids and subsequently spread to chlamydiae. P-values < 0.001 from AU tests for scenarios A whereas the P-value = 0.017 for scenario B.

### 8. 3-dehydroquinate synthase (D)

CLUSTAL X (1.83.1) multiple sequence alignment

45508724 *Anabaena variab*  
KMO00293952 *Karlodinium*

IELRLFPITITEPKTIQTFERVIDVFADFKLVRKEPVLVGGGLITDVV  
IKFTKLVFSGNEADKDIRDVERILVALKEIGLARNEPLLVGGGVIADIA

34498288\_Chromobacterium\_viola  
ELO00198527\_Euglena  
74023174\_Rhodoferax\_ferrir  
39937112\_Rhodopseudomonas\_palu  
15836567\_Chlamydomonada\_pneumo  
60491665\_Bacteroides\_fragil  
48430319\_Picrophilus\_torrid  
13542147\_Thermoplasma\_volcan  
19714428\_Fusobacterium\_nuclea  
57234788\_Dehalococcoides\_ethen  
18312973\_Pyrobaculum\_aeroph  
65318882\_Bacillus\_anthra  
15922603\_Sulfolobus\_tokoda  
18978063\_Pyrococcus\_furios  
21674227\_Chlorobium\_tepidu  
57234699\_Dehalococcoides\_ethen  
45655651\_Leptospira\_interr  
6458486\_Deinococcus\_radiod  
46399348\_Parachlamydia\_sp.  
67928196\_Solibacter\_usitat  
54025607\_Nocardia\_farcin  
15827180\_Mycobacterium\_leprae  
67916807\_Clostridium\_thermo  
39933580\_Rhodopseudomonas\_palu  
48766569\_Rhodospirillum\_rubrum  
CM1664\_Cyanidioschyzon\_merolae  
74024228\_Rhodoferrax\_ferrir  
26249983\_Escherichia\_coli  
22655384\_Arabidopsis\_thalia  
34496282\_Chromobacterium\_viola  
164848\_Chlamydomonada\_rein  
67158019\_Azotobacter\_vinela  
15600231\_Pseudomonas\_aerugi  
68179822\_Desulfuromonas\_acetox  
39984013\_Geobacter\_sulfur  
57223777\_Cryptococcus\_neofor  
68466574\_Candida\_albica  
BNO00088117\_Bigelowiella  
53796836\_Chloroflexus\_aurant  
33240459\_Prochlorococcus\_marin  
46135112\_Anabaena\_variab  
16330660\_Synechocystis\_sp.

IIGEIVPVPGEACKDPQQLWRLLQALADRNRDRHSYALAIIGGGAALDAV  
PSVMKYLVPDGDACKSWDMSDLVQWLFASKATKRSVIVTWGGGAVLNVG  
NHPKVIIVTEATEENKSIERVIPIARLVANKARRGDTLVAIGGGIIQDIT  
EAKRRIRIDALEANKSLEYAPHLISELRKAGADRSTHLVAIGGGIIQDQV  
YQVIVLTFPPGEPNKTWETFIISLQYQLVDQNI SPKSSIIGIGGGTVDLDMT  
KDAVEITIGAEDVHKLETLASVWQVLSEKGA TRHSLINLGGGMVTDLG  
FIKNRIIDDGERAKSMEYLTLLIINELLNKRVRGDSIIYIGGGTTGDLS  
NSVVKISLNDGESLKSRLNYQKIVKVLLEKRVDRSLLVYIGGGTVGDLA  
DKVYFVFAIKDGEYKNIIESILPVYDFMLENNFSRKSLLIISLGGGVICDMG  
TETHLLAFPAGEASKTLSTLEDIGSKILDLRATKSSVIVCLGGGVGNLG  
PNAPALALKGGEGVKSLEALSKEYVYVFLQEAEDRGS TLVAVGGGALLDLA  
QKVFVSVVPSGEKEKSFENFYAAHTSALENKLDNRSLI IALGGGMIGDLA  
KSFIEIPIIDGEGAKDIQYALKLVLKLFENGFRDGYVIALGGGTVDV  
FKPQTIIVVDPGEKYKDLDTVRYIWEKLEMGFTRRSLLIGLGGGVI TDIA  
FRTIELVVPARETSKSVSTAWKLYGQMIEADVDRSWNLLCAGGGVVDLG  
IGSLFLELPEGETHKS LDMASHIYPQLINHFARNTPI IALGGGVIGDLS  
LPKTIYIKGGEKSKHINRTGEVYNQLIEYGADRKSLILAFGGGVVDFA  
QPHLTVVTPARDECKTLEVFADVLSQLAQAGLPRSGAVVGLGGGAATDLA  
WNFVLLIPEGETSKSLKQTRCWRHF IKHQLD RYSLVVALGGGVICDLA  
IPFEILNLPGGEDQKRLAPVEALAEEMVQRGADRSSMVIAYGGGIVTDMG  
IDAHRVEIPDAEAGKDLAVAGFCWEVLGRIGLTRNDVVVSLGGGAATDLA  
VDAHRIEIPDAEAGKDL SVMDFIWEVLGRIGIGR KDALVSFGGGAATDVA  
YEVSKFVIPAGEENKNDTTRDIYKYLGLKLD R SATLMALGGGVVDIT  
IAHASVIVGEGESSKSYAGLEQVCEALIAAKIERNDLVIALGGGVIGDLA  
IAHDHVLPAGEATKSF S QLEELDLLLAARFERSTLLALGGGVIGDLV  
DRVEECLPDGEEYKTMDSLRAIIDVCMQKR LDRKSTLFA LGGGVIGDLT  
KHIHTVLPDGEAFKWTQTLNLI F DALLSHGCDRKTILFALGGGVVDMT  
VNVDSVILPDGEQYKSLAVLDTVFTALLQKPHGRD TFLVALGGGVVDLT  
VTVESVILPDGEKYKMDTLMKVFDKAI ESRLDRCTFVALGGGVIGDMT  
VACSSVLPDGEQHKDWTQTLNLI F DALLSGNAERK TLLIALGGGVIGDMT  
LQVDEVVLPDGEYKSMVEVLGKVVWDKALESRMDRGVTF LALGGGVVDMT  
HELTPVILPDGEAFKHWETLQKIFDGLLEARHRR TLLIALGGGVVDMA  
HEVTPVLPDGEAYKQWETLQKIFDVLKERHDKR TLLIALGGGVIGDMA  
YDVEQIVVEDGESYKNAETLNTIYTR LIELGCDRHSGI IALGGGVVDMA  
FTVLRIDIPDGEHKT SVTTLTSVYDEL IKGGLTRD SLLVALGGGVVDLA  
ARFLVYEVAPGEGAKSRKVKEI EDWMLDNKCTRD T VILAFGGGVIGDLT  
SRLLTVCVSPGENNKNRATKAAVEDFL LQQGCTRD T VILAVGGGVIGDMI  
-----  
YRVHTTVPVSGEQSKSFGELNRLYDWMIEHGIERRDVV LALGGGVVDLA  
YDANLLILEAGENKKNYESIALIHNAAYEHQLDRGSLI IALGGGVIGDMA  
FQVASYCLPAGERYKTLNSIQKLYDIALENRLERSSTMVALGGGVIGDMT  
YEVFQHLIPAGETHKTLASINELYDVAFOANLERNSTLLSLGGGVIGDMT

44508724\_Anabaena\_variab  
KMO00293952\_Karlodinium  
34498288\_Chromobacterium\_viola  
ELO00198527\_Euglena  
74023174\_Rhodoferrax\_ferrir  
39937112\_Rhodopseudomonas\_palu  
15836567\_Chlamydomonada\_pneumo  
60491665\_Bacteroides\_fragil  
48430319\_Picrophilus\_torrid  
13542147\_Thermoplasma\_volcan  
19714428\_Fusobacterium\_nuclea  
57234788\_Dehalococcoides\_ethen  
18312973\_Pyrobaculum\_aeroph  
65318882\_Bacillus\_anthra  
15922603\_Sulfolobus\_tokoda  
18978063\_Pyrococcus\_furios  
21674227\_Chlorobium\_tepidu  
57234699\_Dehalococcoides\_ethen  
45655651\_Leptospira\_interr  
6458486\_Deinococcus\_radiod  
46399348\_Parachlamydia\_sp.  
67928196\_Solibacter\_usitat  
54025607\_Nocardia\_farcin  
15827180\_Mycobacterium\_leprae  
67916807\_Clostridium\_thermo  
39933580\_Rhodopseudomonas\_palu  
48766569\_Rhodospirillum\_rubrum  
CM1664\_Cyanidioschyzon\_merolae  
74024228\_Rhodoferrax\_ferrir

GFACSTYRRSSNYIRIPTTLIGLIDASVAIKVAVNHRKLNKRLGAYHASR  
GFATSMYSRNPYVMLCTSIVAGIDAGPSPRVCCNGFDYKNLYGSYHPPV  
GLAASLFHRGVRHIRLPSTVLSQADSGVGVKNAINWNGQKNLLGSFAVPW  
GLVASMVFRGMKYVQIPTLLAMHDVTSLSKTSICFQGRKNNIGSYAPI  
CFIASTLLRGMAWRFVPTLLAQADSCIGSKSSINLGATKNLIGTFNPPE  
TFAASIFMRGLPWTYMP TLLSMVDSICGGKSSINAAGYKNLVGNFYPPK  
GFLAATYCRGLPLYLIP TTTITAMVDTSIGGKNGINLRGKKNLGT FYLPK  
GFAAATFKRGIAYINIP TLLAMVDASVGGKTGINFNLGNLIGAFAPAA  
GFAASIIYKRGMLIAVPTLLAQVDSSIGGKNGINYMNIKNLIGTFNPK  
GFVASTYKRGVMIAVPTLLAQVDSSIGGKNGLDFSDVKNVIGTFNPNY  
GYISATYMRGIEFIQVPT SLLAQVDASVGGKVAINHPKCKNMIGSFKNPY  
GLTAALLFRGLRFFHIPTT MVAQIDSAIGQKQAVNYKMGKNLFGQYAYPE  
TFAAGTYMRGIGLVQVPTLLAMVDAALGGKGVAVDGLVKNLVGVFYQPK  
GFVAASFMRGIRFVQVPTLLAH-DSAVGGKVAINHPLGKNMIGAFHQPE  
GFVASTYMRGINLINIPTLLGMVDA AIGGKTGVNFENVKNVLGT FYQPT  
GFVASTYMRGTYLGLVPTLLAQVDA AIGGKTGINF-YGKNIIGTFYLPK  
GYIAASYRGPVQVLP TLLAMTDSSIGGKVAINHPLGKNLIGFFHMP  
GFVAATYQRGVPLVHLPT SLLSQVDSSIGGKVAVNHHGKKNLIGSFYQPR  
GFIASTYLRGIRFVQIPTLLACVDSSVGGKVAVNADFGKNMIGSFYQPE  
GFVAASYLRGVAFYTAPTLLGMVDAAVGGKTGVNLP EGNLFGVAVPPR  
GFVASCYMRGIDTIYLP TLLAMVDASIGGKTGINTSKSKNIIGSFHLPK  
GFLAAIFMRGIVLQIPTLLAQVDA AIGGKTGVNLSGKNLIGSFHQPL  
GFVAATWMRGVRIHVPTLLAMVDAAVGGKTGINTEAGKNLVGAFHQPL  
GFAAATWLRGVSIVHVPTLLGMVDAAVGGKTGINTEAGKNLVGAFHQPL  
GFAAATFLRGINFVQIPTLLAQSDSSVGGKGVGVDFEGTKNIIGAFYQPK  
GFASALLRRGVDFVQVPT SLLAQVDSSVGGKTGINSPQKNLIGTFHQPR  
GFAAASILLRGVDFIQIPTLLAQVDSSVGGKTGINTEAGKNLVGAFHQPR  
GFAAASVLLRGVDFIQVPTLLAVVDSAVGGKTGINHPLGKNMIGSFYQPH  
GFAAASYMRGVFVQVPTLLAQVDSSVGGKTGINHPLGKNMIGAFYQPL

26249983\_Escherichia\_coli  
22655384\_Arabidopsis\_thalia  
34496282\_Chromobacterium\_viola  
164848\_Chlamydomonas\_rein  
67158019\_Azotobacter\_vinela  
15600231\_Pseudomonas\_aerugi  
68179822\_Desulfuromonas\_acetox  
39984013\_Geobacter\_sulfur  
57223777\_Cryptococcus\_neofor  
68466574\_Candida\_albica  
BNO00088117\_Bigelowiella  
53796836\_Chloroflexus\_aurant  
33240459\_Prochlorococcus\_marin  
46135112\_Anabaena\_variab  
16330660\_Synechocystis\_sp.

GFAAASYQGRVRFIQVPTLLSQVDSSVGGKTAVNHPLGKNMIGAFYQPA  
GYAAASYLRGVNFIQIPTTVMAQVDSSVGGKTGINHRLGKNLIGAFYQPO  
GFAAACYQRGAPFIQIPTLLAQVDSSVGGKTAINHPLGKNMIGAFYQPK  
GFAAASYQGRVHFVQVPTTVMAQVDSSVGGKTGVNHPLGKNMIGAFYQPR  
GFAAACYQGRVDFIQIPTLLSQVDSSVGGKTGINHPLGKNMIGAFYQPK  
GFAAASYQGRVNFVQVPTLLSQVDSSVGGKTGINHPLGKNMIGAFYQPO  
GYAAATFLRGIFVQIPTTVLAQVDSSVGGKTAINHPLGKNLIGAFYQPW  
GYAAATYLRGVFVQVPTLLAQVDSSVGGKTGINHPLGKNLIGAFHQPR  
GFVAATFMRGVKVFQIPTLLAMVDSSVGGKTAIDTPHGKNLIGAFWQPS  
GFVAATFMRGVRVQVPTLLAMVDSSVGGKTAIDTPHGKNLIGAFHQPE  
-----MVDSVGGKTAINVPAGKNLIGAFHQPR  
GFAAATILRGVALVQIPSTLLAMVDAVGGKTGINHPLGKNLIGAFHQPR  
GFAAATWLRGIDFVQVPTLLAMVDAVGGKTGVNHHPGKNLIGAFHQPK  
GFAAATWLRGINVVQVPTLLAMVDSAIGGKTGVNHHPGKNLIGAFHQPR  
GFGAATWLRGINFVQVPTLLAMVDASIGGKTGVNHHPGKNLIGAFHQPR  
\* . : \*\* \* : .

45508724\_Anabaena\_variab  
KMO00293952\_Karlodinium  
34498288\_Chromobacterium\_viola  
ELO00198527\_Euglena  
74023174\_Rhodoferrax\_ferrir  
39937112\_Rhodopseudomonas\_palu  
15836567\_Chlamydomonas\_pneumo  
60491665\_Bacteroides\_fragil  
48430319\_Picrophilus\_torrid  
13542147\_Thermoplasma\_volcan  
19714428\_Fusobacterium\_nuclea  
57234788\_Dehalococcoides\_ethen  
18312973\_Pyrobaculum\_aeroph  
65318882\_Bacillus\_anthra  
15922603\_Sulfolobus\_tokoda  
18978063\_Pyrococcus\_furios  
21674227\_Chlorobium\_tepidu  
57234699\_Dehalococcoides\_ethen  
45655651\_Leptospira\_interr  
6458486\_Deinococcus\_radiod  
46399348\_Parachlamydia\_sp.  
67928196\_Solibacter\_usitat  
54025607\_Nocardia\_farcin  
15827180\_Mycobacterium\_leprae  
67916807\_Clostridium\_thermo  
39933580\_Rhodopseudomonas\_palu  
48766569\_Rhodospirillum\_rubrum  
CM1664\_Cyanidioschyzon\_merolae  
74024228\_Rhodoferrax\_ferrir  
26249983\_Escherichia\_coli  
22655384\_Arabidopsis\_thalia  
34496282\_Chromobacterium\_viola  
164848\_Chlamydomonas\_rein  
67158019\_Azotobacter\_vinela  
15600231\_Pseudomonas\_aerugi  
68179822\_Desulfuromonas\_acetox  
39984013\_Geobacter\_sulfur  
57223777\_Cryptococcus\_neofor  
68466574\_Candida\_albica  
BNO00088117\_Bigelowiella  
53796836\_Chloroflexus\_aurant  
33240459\_Prochlorococcus\_marin  
46135112\_Anabaena\_variab  
16330660\_Synechocystis\_sp.

KVFLDFSLRLPTDQVRNGMAELVKI AVVAHQEVFELLEAHRLTYKAIH  
LTITDRGFWKSLHPGWL RHGVAEIIKMAVMKDL SFLNMECDLIVGKAME  
AVINDAALIDGLPAREKRAGMAEAVKVALIR DASFFRWLEQLIRRSAA  
LSLIDVAFRCRTLPPAELFSGLGELAKFGAEHAEGFIDALTTLEQLVGLGKIK  
KIHLCSEFLDITLDQKDIYSGVGEILKVHAIAGKETFDLLALRRYIGSALR  
KVLVDVSFISTLDAEMIAGGLFEAAKICYANYQAFLDYLA AVNVIRHSL  
EVMWCPQFLSTLPREWYHGAEAIAKHGFIADAYLWEFLNLHEFKIKRNCQ  
SVLIEFTEFLDLDHNFSGYAEMLKHLISNTSHWAE LLLKLVGHVSQ  
LIIDDFRID--DKKLMMDGLAESLKMGITIEPELFNIN--RIITLSIN  
MVIDDVTFLKN--NSFIIREGMSEVIKYAIIISGGDMYDTLN--TNIKLSVK  
RVIDVDFLKTLPKREFKSGMGELKHSFLKDKSYLEYIELENI VEQSIR  
FVFDNFRLTLPERQIRAGLAESVKHGLCQESSFFDYIEIDYISRHTIE  
ALCDLEWLRSLPPRVYRSFAFAEVVYGLALDEEFYSWLRLEEA VYRSLK  
AVVYHTPFLQSLPEKEWRSYAEVIKHALIGDVKLYHWLKL I HILMKAIP  
MIISDLNFLTLPLEEIKKGLAEVIKYGLVLDKDLDYLALEEEI IYKSSV  
FVLCIRDFLKTLPMVEILNGLAEVVKYGIL--DKEYNAIKKREDI I KKSVA  
LVLIDPAYLRTLPSREIYGGMSEVVKYGF IADREFFD LLLTKAVRSFA  
LVISDISCLKTLPEKEFACGMAEIIKSAAGSSELFKQLEMEDI ISQTAA  
FVFAPLSVLTLPDREWKCQAEIIKHSLLSGGEYWEKVKLPYLIAESVR  
AVWCDDTATLTLDPDAVFREGAAEAFKGLMADPSLLDRV--LEDTLADIA  
KILIDPFTLTKLTKKHYQAGFAEIIKYGMIASPSLFEFLELEII IQQSCA  
AVLTDPAI LDSLPEREYRAGLWEI I KAGI IREVELFDYLSVDHIIAESVR  
AVLVDLATLETVPNEIVAGMAEIIKAGFIADPVILELVELPELIRRAIQ  
AVLADLATLETLPKREI ASGMAEVVKAGFIADPIILD LIELPELIRRAVT  
FVYINVNTLKTLPERELKAGLAEVVKHGVIMDEEFY EYIDLQYIAKRNC  
LVLADTALD LTLSPRQFRAGYAEVAKY GAGLDEAFFAWLEREHAVATSCR  
LVLADTTVLDLTPRELLAGYGEVVKYGV I DPAFFDWLERIHAVLTACR  
AVIADTATLTLDPDPRQISAGIAEIIKYGLICDEEFFNWCIEQYAMERSCA  
KVVCDLDTLKTLPARELSAGLAEVIKYGPIADLEFLAWIELAHAVKRSC  
SVVVDLCLKTLPPRELASGLAEVIKYGII LDGAFFNWLEMA YCIRRCS  
CVLVDTDLNTLPDREMASGLAEVIKYGLIRDAEFFEWQELAFAIKRSC  
AVIADLLETLPDRELSAGLAEVIKYGLLDGAGFLAWLELQYAVKRSC  
VVLVDTDLTLATLPDRELASGISEVIKYGLIRDAPFFEWLEIAYAVERSCI  
AVVIDTATLTLPERELASGLAEVIKYGLICDEPFLGWLEL TEA IARSCA  
AVVIDTASLKTLP SRELSAGLAEVIKYGFI CDEPFI TWLEVTEA IERSCA  
AVFINVATLETLDQRNVLAGIAEVIKYGV MFDETFFSWLEIAYAVRSCE  
AVLIDVDLTLATLPQREYLGGLAEVIKYGVVLDGKFFAFLEL VRAITRCCA  
YIFVDLAF LTTLPTRVSNMAEVIKTA IWKDDDFALLELQVVS GSIY  
YVFCDSVLETLTPARQFINGMAEVVKTA IWN EEEFTRLEKAE LVT SVR  
VVYADMLLLKTLTEKQVKEGLAEAVKMG CIRNAGLFDYMELAEVIYTAIK  
LVLADTNLLATLPARELRAGWAEVIKHGVIRDAELFDALEL TNIIARAVA  
LVLIDINTLKTLPQREFRSGMAEIIKYGV I KDLEL FNKLELLEL I KISVS  
FVLIDPQVLKTLPVREFRAGMAEVIKYGV I WDAELFNQLEMDAILTRSCQ  
LVYIDPVVLTLPEREFRAGMAEVIKYGV I WDSSELFTALELTKI IQRSCQ  
\* \* \*

45508724\_Anabaena\_variab  
KMO00293952\_Karlodinium  
34498288\_Chromobacterium\_viola  
ELO00198527\_Euglena  
74023174\_Rhodoferrax\_ferrir  
39937112\_Rhodopseudomonas\_palu  
15836567\_Chlamydomonas\_pneumo  
60491665\_Bacteroides\_fragil  
48430319\_Picrophilus\_torrid  
13542147\_Thermoplasma\_volcan

KMLELEVPNLHELDDLDRVIAYGHTWSPTLE--MFHGHAVNVDMAFSATIA  
GYVRSEYGNLWETHQARPHAYGHTWCPGYE--MLHGQAVGTCMGYAYLA  
LHLRQITQDPFQGSARPLDYGHWIAHKLRLNLHNGEAVAI G VACDARHS  
AKMTYELDDAYEKKFGMIFEYGH TVSHAIEKAIPHGLGVAYGMLCCS YVS  
IKQYI EADDFRGIRNIFNYGHSFGHAIESAVPHGI AVAMGMDMANAIA  
TKKWFIEIDFQKERLLNFHGHTFGHALEAAI SHGVGVGLGMLVAQA  
YIAKAAI VAE DDPYDRSLRKLILNFGHSIAHAIETLVNHGQAVSVMGMIE TRIS  
VKEDIVQDPFHEGIRKALNLGHTVGHAFESLVLHG YAVAVGIVCELYLS  
AKLSIVSKDFHDKHRLVYVNLGHTIGHALESYISHGEAVANGMIIEAYIS  
IKSEIVNRDFYDRGIRSVLNLGHTIAHGIEGAI SHGKAVATGMLVEAHIG

19714428\_Fusobacterium\_nuclea  
57234788\_Dehalococcoides\_ethen  
18312973\_Pyrobaculum\_aeroph  
65318882\_Bacillus\_anthra  
15922603\_Sulfolobus\_tokoda  
18978063\_Pyrococcus\_furios  
21674227\_Chlorobium\_tepidu  
57234699\_Dehalococcoides\_ethen  
45655651\_Leptospira\_interr  
6458486\_Deinococcus\_radiod  
46399348\_Parachlamydia\_sp.  
67928196\_Solibacter\_usitat  
54025607\_Nocardia\_farcin  
15827180\_Mycobacterium\_leprae  
67916807\_Clostridium\_thermo  
39933580\_Rhodopseudomonas\_palu  
48766569\_Rhodospirillum\_rubrum  
CM1664\_Cyanidioschyzon\_merolae  
74024228\_Rhodoferax\_ferrir  
26249983\_Escherichia\_coli  
22655384\_Arabidopsis\_thalia  
34496282\_Chromobacterium\_viola  
164848\_Chlamydomonas\_rein  
67158019\_Azotobacter\_vinela  
15600231\_Pseudomonas\_aerugi  
68179822\_Desulfuromonas\_acetox  
39984013\_Geobacter\_sulfur  
57223777\_Cryptococcus\_neofor  
68466574\_Candida\_albica  
BN000088117\_Bigelowiella  
53796836\_Chloroflexus\_aurant  
33240459\_Prochlorococcus\_marin  
46135112\_Anabaena\_variab  
16330660\_Synechocystis\_sp.

IKKHYVDIDPFKGERAFNLGHTYAHAFESFYTHGEAVSKGIIFDLELS  
LKLELLKIDPFEGKLDLPQLELGHGTIGHAVEIILLHGESIAIGMVAEALS  
LKASVVEADEFEEGIRQVLNVGHTVGHALERVLLHGEAVSLGIAEELRLS  
VKANIVAQDETEKGVRAHLNFGHTLGHAEKEITHGDGAVGMLFAIFLS  
DKFSVVKADERETGIRIVLNFHTIGHAIEAGVPHGYAISVGMVCEAKMA  
VKLRIVEEDLKENGKRRVNLGHTVGHAEIKI IKHGFVSMGLVVEAKIG  
IKANVVEKDFRETGLRATLNFHTFGHAEKMLRHGEAVTIGMVCALFSL  
IKAGIVCQDETRDGRIRNLNFHTLGHAELESTQSHGAAVAIGMCFASRLS  
FKANVVSDEKETGLRKLNLGHTTAHAIESVYSHGEAVAIGLVTALLLS  
VKAGVVTDLTEQGERAFNLGHTLAHALEAVIPHGEAVAYGMHYAARLS  
IKKKYVEADFKDLGIRQLNYGHTFGHVIEMLYHGEAVSIGMSCAAYLS  
MKAEVVSDEREGDMRRILNFHTFGHAELELLHGEAVAWGMRAAIYLG  
VKADVVAADLKESLREILNYGHTLGHAIERRRWHGAAVAVGLVFAAELG  
VKAGVVADEKESLEILNYGHTLAHAIEERRRWHGAAVSGLVFAAELA  
IKASVVEKDEKEGGLRALILNFHTIGHAIEVTLVLLHGECVSLGMVAMRMA  
AKAAIVARDERETGDRALLNLGHTFGHAEALFPHGEGVAIGMVLAAEFS  
AKARVVAEDEREGRRALLNLGHTFGHAEALHGEAVAGMVMALDLS  
CKAAVVAADERESGYRAILNLGHTFGHAEAAWLHGEAVAGMVAALAAAS  
IKAWVVQDEREAGLRAILNFHTFGHAEAGWLHGEAVGCGMVAHAHLS  
LKAEVVAADERETGLRALLNLGHTFGHAEAEWLHGEAVAGMVAARTS  
NKADVVSQDEKESGLRATLNLGHTFGHAIETGWLHGEAVAGTVMVAADMS  
MKAAVVAADERESGVRALLNLGHTFGHAEIAGWLHGEAVAGMVAALAAAS  
NKAEVVAADERESGVRATLNLGHTFGHAIETGWLHGEAVAGTVMVAADLS  
AKARVVGVDERESGVRATLNLGHTFGHAIETGWLHGEAVAGSVMMALEMS  
AKARVVGADERESGVRATLNLGHTFGHAIETQWLHGEAVAGTVMMALEMS  
LKAEVVAQDEKESGVRATLNLGHTFGHAEVQLVHGEAVAIAGMVAANVS  
LKAWVVEQDERETGLRAVLNYGHTFGHAEALVHGEAVAGMVAARAVLA  
VKAHIVTIDERETGLRNLVNFHTIGHAIEAVL-HGECVSVGIVLEAEVA  
VKAGVVSDEKESGLRNLNLGHTIGHAIEAVL-HGECVSIKMIKAEALS  
GKADVVAQDEKESGLRATLNLGHTIGHAVEALLYHGEAVAIAGMVAEMAVL  
VKVDVVSDEFERGERITLNYGHTIGHAIEQLLLHGECVAIGMDAAARIA  
IKARIVEKDEKESGLRALILNYGHTFGHVIEVTLVHGEAVSMGMVLIQQLA  
AKADVVGKDEKESGLRALILNYGHTVGHAVESLLKHGEAVGIMVVAAGQIA  
AKVDVVSQDEKESGLRALILNYGHTVGHGVSLEINHGEAVAIIGMEAAAKIA

: : \* \* \* :

45508724\_Anabaena\_variab  
KMO00293952\_Karlodinium  
34498288\_Chromobacterium\_viola  
ELO00198527\_Euglena  
74023174\_Rhodoferax\_ferrir  
39937112\_Rhodopseudomonas\_palu  
15836567\_Chlamydomonas\_pneumo  
60491665\_Bacteroides\_fragil  
48430319\_Picrophilus\_torrid  
13542147\_Thermoplasma\_volcan  
19714428\_Fusobacterium\_nuclea  
57234788\_Dehalococcoides\_ethen  
18312973\_Pyrobaculum\_aeroph  
65318882\_Bacillus\_anthra  
15922603\_Sulfolobus\_tokoda  
18978063\_Pyrococcus\_furios  
21674227\_Chlorobium\_tepidu  
57234699\_Dehalococcoides\_ethen  
45655651\_Leptospira\_interr  
6458486\_Deinococcus\_radiod  
46399348\_Parachlamydia\_sp.  
67928196\_Solibacter\_usitat  
54025607\_Nocardia\_farcin  
15827180\_Mycobacterium\_leprae  
67916807\_Clostridium\_thermo  
39933580\_Rhodopseudomonas\_palu  
48766569\_Rhodospirillum\_rubrum  
CM1664\_Cyanidioschyzon\_merolae  
74024228\_Rhodoferax\_ferrir  
26249983\_Escherichia\_coli  
22655384\_Arabidopsis\_thalia  
34496282\_Chromobacterium\_viola  
164848\_Chlamydomonas\_rein  
67158019\_Azotobacter\_vinela  
15600231\_Pseudomonas\_aerugi  
68179822\_Desulfuromonas\_acetox  
39984013\_Geobacter\_sulfur

ARRGYITIAERDRILGLMSRVGLDIDILWRGTESITLLRAAMPK  
YVKGFIKDEMHRILKVISDCEIMEDKWKSNLAIIEKLAAPVVK  
VLAGLLPEGGETRVWQLLRALGHGRLALLRGLDEFRELCVTLA  
HRLGMSAEDRHKHDALIQKWPPTANRILELGMRSKVFSEVLLK  
SGRGLTSIETYQRMHGVLLKKN-IQTDALMTALMKDKKLVLLPI  
KRETELTDAGKDHVAHLIEHVKVDLDMAMEKFEFDKRYRIVIPN  
LAEMVMTQPLIDQLERLLKRFNYSPENI IYTYLGYDKKLMIMIE  
HLKGFPEKMRQTIQFIKDNYGFDCKQLYEFMQHDKKINFTLLK  
KCLGNA--DISNEIRSIKRLGVDINRLLEYIKNDKINIVAVN  
EKYGNNTNHEVIEAIRDLMKRYGIGPNIILRYISNDKKINMPVPS  
LLRGQIDKEYLERARNIFKFLDPLSPDKFIPLMRDKKIIITILLD  
CEMGYMKPELAAKIERIFKKLGVPLEGVLEALRYDNKTDFFLLE  
AELGYLREKYVEETKSLKAFELSSQAKGLIKYDKKIVLPLVI  
EQV-YKVNLAYEEMKQWFLNYGLSVERLVGLMKQDKKIHVMVMQ  
EEVGYAEQVVEEDVTWILSQYEIDVKAIDAITKDKKVMPPPT  
EILGFDSGKVVE---ILTKFGFDPPYTLQAMKIDKKIIVIVPV  
HRPGLFAEADLREGLALLARFLDRDELVESMLSDKKLRFVLLD  
VKLGLCENETVLRLEKLIADFGIDPEKIIDAMHDKKIRFILLK  
EQHSELDPVTTKETIESLKNYGLKSKQLAKHMLHDKKIRFVLLK  
HALGADLTAHTR--AFLRWQLTFDALAPFIARDKKVRFVLLR  
CQMGLTTOETMQRDALCQQAQFPLTRFTYLMKADKKINLILPE  
ESTGYVSAEDSDMLQMIEDYGIARAENLLARLVHDKKVHFLVLPV  
RLAGRLDDATAADRHTILEAVGYDADALLDAMQTDKKLRFVLLD  
RVAGRLDDATAQRHHTILTSGLYDADALLEYMAGDKKLRVILLD  
LYLEMIDEQSVNRVKNLTKIGIDVDKVVYQMFYDKKLTFLVLP  
AERGMPATDAERLAKHLAEVADADRLMALMAQDKKLTFLIME  
VRLGLCPPADAARLRAHLDHVGNWAERLLAAMDHDKKVTFLAR  
RRLGFIDEQVVRRIEAILTEAMNVTFTFLTYMAMDKKLRVLLLE  
LRLGLIDAALVQRLTTLIQKAGSASDNYLEMLRLDKKIKFVVID  
ERLQGFSSAETQRIITLLTRAGMSAQAYLPHMLRDKKMLLILPL  
YRLGWIDESIVKRVNKLVRKMTVSMFKSIMAVDKKLRLLILK  
AELGWIGRDEAERVRLIAAAGMPTEQWLNLSHDKKRVFVLLR  
YRLGWIDQSLHDIRIVALMQRARMTTEQFRSLMAVDKKLRLILLR  
RRLGWLGEAERDRGIRLLQRAGMSADDFLGHMAVDKKLRLVLLR  
HRLGWLAAAERDRGIRLLRRAGMTAEDFMEHMAVDKKLRLVLLQ  
RLMELCQSDSVERLTRLLEAFGFSLEDYLAAMGRDKKLRVIVNV  
EARGHSSAGDTRRIRALVEALGFADSDYRVDLRLDKKLDVFLNR

|                                |                                              |
|--------------------------------|----------------------------------------------|
| 57223777_Cryptococcus_neofor   | RQLGILSQVAVGRLTRCLQAYGLSVDRLLDIMKIDKKKIVLLS  |
| 68466574_Candida_albica        | RYLGILPPVAVARLSKCLVAYVEIDILLKKMAIDKKIRCVLLE  |
| BNO00088117_Bigelowiella       | ADMGHLDAKHVDRITECLKAYNLKVEDMMKKMKIDKK-----   |
| 53796836_Chloroflexus_aurant   | VALGICPPALVERQRNLLAAYGLDRSAILTLIGRDKKVRWVLP  |
| 33240459_Prochlorococcus_marin | LRKNLWNVDDALRQEKLLTKAGINNEDVLRTLKGDKKIRLIVPL |
| 46135112_Anabaena_variab       | VNLGLWQQADADRQNALIEKAGLDIEGIIIEALQLDKKVRFVLP |
| 16330660_Synechocystis_sp.     | HYLGLCDQSLGDRQRQLLLKTKLAVENLLASLLHDKKVRFILPT |

**Note:** All top hits in GenBank searches (using *Cyanidioschyzon* and *Arabidopsis* sequences as queries) are from gamma-proteobacteria. Phylogenetic analyses show that red algal and green plant sequences group with beta and gamma-proteobacterial homologs with strong support. The *Arabidopsis* sequence (GenBank accession number AAM98284 and TAIR locus AT5G66120) is annotated as a chloroplast precursor. Sequences of *Euglena* and *Karlodinium* were obtained from TBestDB.

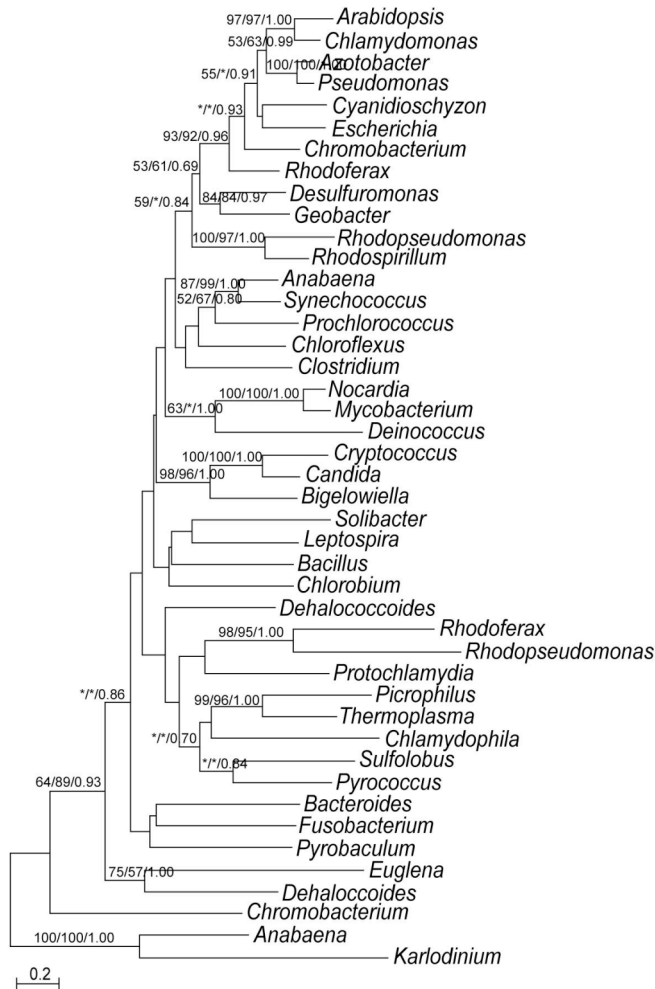

**Figure 8.** Molecular phylogeny of 3-dehydroquinate synthase. P-value = 0.997 from AU test on the presented tree. AU tests were also performed on alternative topologies, including (A) monophyly of all eukaryotic sequences (except for *Karlodinium*, which appears to be of cyanobacterial origin), (B) monophyly of cyanobacterial, green plant

and red algal sequences. These tests investigate if red algal and green plant sequences have the same origin (mitochondrial or eukaryotic) and if they acquired the gene from plastids. P-values < 0.001 from AU tests for both alternative topologies.

---

## 9-10. 2-methylthioadenine synthetase (E, D)

CLUSTAL X (1.83.1) multiple sequence alignment

```

24213838_Leptospira_interr      KFYITTLGCPKNIADSMHSHLLEEGFEESDFHFINTCTF IQSATEETI
111225093_Frankia_alni        RVALVTLGCSRNEVDSEELAGRLAAQGWADAVLVNTCGFVDAAKKDSI
15835786_Chlamydomonada_pneumo KIHFIISLGCSSRLVDSEVMLGILLKAGYEDADYLILNTCAF LKSARDEAK
76258351_Chloroflexus_aurant   KYHIVTLGCPKNAVDSEGMDGLLSTQGHEEADVIVNTCSFIAAARAETL
116060729_Ostreococcus_tauri  RVSMVSLGCPKNTVDGEVILGDLHLANGFEAADAI IINSCGFVEDAKNESV
CM3493_Cyanidioschyzon_merolae RVAVVAMGCAKNTVDAEVFLGDL SAKGFEPADAIIVNTCTFIDEAKSESI
94417985_Pseudomonas_aerugi   KVGFVSLGCPKALVDSEIRILTQLRMEGYEDADV VVVNTCGFIDS AKAESL
94984483_Deinococcus_geothe   KVGFISLGC PKALVDSEIRILTQLRAEGYEDAQAVIVNTCGFITPAVEESL
119886282_Thermotoga_petro   RVGIKVLGCPKNEADCEVLGVLREGGHK DADV VVLDTCAFIEDAKRESI
116620691_Solibacter_usitat   KVGFISLGC PKNLVDSEVMMGQLVAKGHDQADVLV VNTCSFIDPAKKESV
118443956_Clostridium_novy   KIGLISLGC DKNRIDSELLLGLKLNK N-NKADIIIVNTCGFIESSKQESI
32476670_Rhodopirellula_baltic GRVVVSLGCPKNLVDTEQMLGR LDADGYDGAD FVVVNTCGFIDSARDESM
108760706_Myxococcus_xanthu  SLYMMLTGC PKNRVDSEVMLGTLRHRGYS DAQVI VVNTCAFIGPAKQESV
51892771_Symbiobacterium_therm KVGFISLGC AKNLVDTE SMIGLLRNTGYE EADV LVVNTCGFIDAAKQESV
33862448_Prochlorococcus_marin SVAFHLGCE KNRVDTEHMLG LLEAGYNDAA VVVVNTCSFIDAREESV
16331757_Synechocystis_sp.   TIAINHLGCEKNRIDSEHMLG LLEAGYELADY VIVNTCSFIQDARQESV
15606200_Aquifex_aeolic      KIGVVSLGCAKNLVDSEI LLGKLGKAGVEEADVI VNTCGFIEPAKLESI
21674219_Chlorobium_tepidu   RVDVITLGC SKNLVDSEVLMRQFLSNGYVCGE I VVVNTCGFIGDAQEESV
34540013_Porphyrromonas_gingiv KINVITLGC SKNTYDSEVLMGQLKANG--EEGN I VVVNTCGFIDNAKESV
126662084_Flavobacteria_bacter KVNIVTLGC SKNLVDSENLLTQLRNGIDNSN VVVVNTCGFIDNAKQESI
110637073_Cytophaga_hutchi   TVRIETLGC KVNQYSEYMAEQLEKAGYGDV SYYIVNSCAVTKVEKVKV
119885033_Thermotoga_petro   KFFVQNFGRCA TQADGAALLESLLAAKGLAGAD LVLVNTCTVTASADDDVR
116622276_Solibacter_usitat  RQNVVTFGCRLNIYESIIRKNLELSG--IDNVA I FNTCAVTKAAEQAR
34580504_Rickettsia_sibiri   GTFLVLCGCRVNQYEVQAYRDQLTILGYI PADLCIINTCAVTASAESSGR
15836008_Chlamydomonada_pneumo TVLFNTLGCRLNFFESDGLFASLSKHG YEHPEVVIINTCTVINKADSKNR
24213088_Leptospira_interr  SVAAVTLGCKVNYAETSSIVDALVSQGWGDADV LIIHTCAVTGEAERKSR
66576257_Chlorobium_tepidu  KVAFHTLGC KVNQYETESIKNQLIKRGYDKSDI YIIN SCTVTSIADRKTR
19704549_Fusobacterium_nuclea KAAFLTLGC KLNFAETSTIGKALAEQVEKADICV INTCSVTEADKCKR
34541783_Porphyrromonas_gingiv KVAFYTLGC KLNFSSETIARDFQNEGF EIADIYVINTCSVTDNADKQFK
126663485_Flavobacteria_bacter KVAFYTLGC KLNFSSETIARDFQNEGF EIADIYVINTCSVTDNADKQFK
110638137_Cytophaga_hutchi  KLRTRTLGC KVNQYETELVRQGLQTIGYESADLC I VNTCTVTETGDAKSR
32477342_Rhodopirellula_baltic TVAFHTLGC KVNHYETAIWQLFKEAGYQTADV VVIVNTCTVTNTGDKKSR
16079597_Bacillus_subtil     KVAFATLGC RVNMYESEAMA EKFIKNGYEMAD VVVVNTCTVTNMSDKKSR
118444753_Clostridium_novy   KVAFETLGC RMNQFD TLLKNKFIQKGYDMAD VVVVNTCTVTVGGDRSSR
15605955_Aquifex_aeolic     TVYIKTFGC QMNVLDSEMVIADLKRHG YGEADLLLNTCSVIRAEAEKTY
32475869_Rhodopirellula_baltic RYVVVTFGC QMNIISDSERLEAALQGVGYEDASF I VLNCSVRESAEREIL
76261232_Chloroflexus_aurant RAHLITYGC QMNEYDTHLVESQLV SFGADEAD FVLINTCAVRGKPVDKVR
94985469_Deinococcus_geothe  TFYIETFGC QMNAHDSEKVVG TLLAEGYEAELV FVYNTCSIRDKAEQKVF
116625754_Solibacter_usitat  KWVIETFGC QMNVSDSEIVCSIMKSSGYNTAD I VFLNTCSIRENAEAKIW
66807387_Dictyostelium_discoi KYFIETFGC QMNESDTEIISGILQKAGFDNAD I VFLNTCAIREGAENKIW
118402077_Tetrahymena_thermo RVFVETFGC QMNAANDSDVVRALLVEAKHSDAT VV VLVNTCAIRENAESRVW
116061814_Ostreococcus_tauri  KVFIETFGC AMNTSDSEIVAS I LAARPDDEADV L VLN SCAIRDKPEVRVL
CM1685_Cyanidioschyzon_merolae KVIYIETFGC QMNEYDSGIVSSLMRDAEYENS D IIFLNTCAIRENAHAKIY
24213805_Leptospira_interr  -----
Jakaba_bahamensis
28872782_Homo_sapien        KVYLETYGC QMNVNDTEIAWSILQKSGYQ EADVILLV TCSIREKAEQTIW
21674804_Chlorobium_tepidu  SFYIHTFGC QMNQADSEIVTALLRAEGFTNAD I VLLNSCAVRENAEERLG
30690642_Arabidopsis_thalia  RIYHETYGC QMNINDMEIVLAIMKNSGYESA E VIFVNTCAIRENAEQRVW
34540755_Porphyrromonas_gingiv KLYIETFGC QMNVDSEVVASVMQMDGYDEAD T I LVNTCSVRDNEQKVL
126663275_Flavobacteria_bacter KLFIESYGC QMNFSDSEIVAS ILYENGYEDAD LVLVNTCSIRDKAEQTIW
110638221_Cytophaga_hutchi  KLYIESYGC QMNFSDSEIVMS I LTEEGFNNA D VILLNTCSIRDNAEQKVR
119885210_Thermotoga_petro   RYFIHTFGC QMNNENDSETMAGLLMKEGFEEAD VVIINTCAVRRKSEKAY
108759982_Myxococcus_xanthu  RYFIHTFGC QMNVNDSL R MSEVLSQMSYDNAD L IILNTCSIREKAEDKML
34581161_Rickettsia_sibiri  KLYIKTYGC QMNVYDSVKMQD LLYPFYEEADV I IILNTCHIREKAAEKTY
94417083_Pseudomonas_aerugi  KLFIVETHGC QMNEYDSRMDLLGEHQAAEAD V ILLNTCSIREKAEQKVF
CM4402_Cyanidioschyzon_merolae RLYVQTFGC QMNLADSERMAGELERC GYEEAD L ILLNTCSIRDNAEQKVL
33862596_Prochlorococcus_marin SFWIQTFGC QMKNKADSERMAGILEAMGYLEAD L VLVNTCTIRDNAEQKVV
16329745_Synechocystis_sp.  RYHIITFGC QMKNKADSERMAGILENLGMNQAD L VLVNTCSIRDNAEQKVV
111225071_Frankia_alni      RSYVRTFGC QMNVHDSERLSGLLESAGYSEAD V VV VNTCAVRENADNRLY

```



19703810\_Fusobacterium\_nuclea  
15605821\_Aquifex\_aeolic  
118443818\_Clostridium\_novyi  
51892897\_Symbiobacterium\_therm  
16078764\_Bacillus\_subtil  
71075619\_Giardia\_lambl  
13542169\_Thermoplasma\_volcan  
71029160\_Theileria\_parva  
71661088\_Trypanosoma\_cruzi  
93277076\_Homo\_sapien  
118373032\_Tetrahymena\_thermo  
116056662\_Ostreococcus\_tauri  
18409989\_Arabidopsis\_thalia  
121522286\_Methanococcus\_maripa  
18978284\_Pyrococcus\_furios  
15920732\_Sulfolobus\_tokoda  
119871859\_Pyrobaculum\_island

KASIIITYGCMNVNESAKIKKIFQNLGYDNADAVFLNTCTVREGAATQIF  
KFFIKTFGCMNFNDSEIRIGLLKTI GYEEADLIILNTCTIREKPDQKVL  
RFFISTWFGCMNEEDSEKISGLLKGIGYDEADVIFNTCCVRENAEQKVY  
RVHIETFGCMNEHDSEIMYGILAQMGYDDADLLFNTPCAVRESAVEHAF  
KPYIRTYGCMNEHDTEVMAGIFMALGYDDANVILLNTCAIRENAENKVF  
RVMVMVTMGCNHAAESDIIASALQTAGARDVDVLYINSCTVKNPSEDKAF  
KIYFEAYGCTLNQGETALYVKNLLNEGNKEADLSIIGTCAVIKKTEDHMM  
VVYLKNFGCSHNSDSEYMLGIISESGYDSCDLVIINSCTVKNPSEHGMI  
TVFIHTFGCSHNSVSDGEYMAGLLAQAGYNDADVLLNSCTVKNPSEEHFI  
KIWIWRTWGCSSHNNSDGEYMAGQLAAYGYSDADLWLLNSCTVKNPSEDFR  
NVYVKTGFCSSHNISDSEFMGQLAEYGYKDAHLILVNSCTVKNPSSQDAFM  
KIFVHTFGCSHNSDSEFMAGQLQSYGYSDADGWLVTCTVKNPSSQSAMN  
TIYIKTFGCSHNSQSDSEYMAGQLSAFYEEADLWLLNTCTVKSPSSQAMS  
KIYIEGYCTLNTADTEIIKNSVNEFEDDSDIIVINTCIVRQTEHRMI  
KVYIENYGCARNRADGEMAGLLSSGYENADIVVNSCAVDPTVEKRIA  
KVYIETYGALNKGDSYIMMILLKDRGHQADVIVLNTCAVRELETERMK  
RIYVETYGWCLAKADAEILRQRL---GYDEADVILVYTCVAVREDGEVRQL

24213838\_Leptospira\_interr  
111225093\_Frankia\_alni  
15835786\_Chlamydomyxa\_pneumo  
76258351\_Chloroflexus\_aurant  
116060729\_Ostreococcus\_tauri  
CM3493\_Cyanidioschyzon\_merolae  
94417985\_Pseudomonas\_aerugi  
94984483\_Deinococcus\_geothe  
119886282\_Thermotoga\_petrop  
116620691\_Solibacter\_usitat  
118443956\_Clostridium\_novyi  
32476670\_Rhodopirellula\_baltic  
108760706\_Myxococcus\_xanthu  
51892771\_Symbiobacterium\_therm  
33862448\_Prochlorococcus\_marin  
16331757\_Synechocystis\_sp.  
15606200\_Aquifex\_aeolic  
21674219\_Chlorobium\_tepidu  
34540013\_Porphyrromonas\_gingiv  
126662084\_Flavobacteria\_bacter  
110637073\_Cytophaga\_hutchi  
119885033\_Thermotoga\_petrop  
116622276\_Solibacter\_usitat  
34580504\_Rickettsia\_sibiri  
15836008\_Chlamydomyxa\_pneumo  
24213088\_Leptospira\_interr  
66576257\_Chlorobium\_tepidu  
19704549\_Fusobacterium\_nuclea  
34541783\_Porphyrromonas\_gingiv  
126663485\_Flavobacteria\_bacter  
110638137\_Cytophaga\_hutchi  
32477342\_Rhodopirellula\_baltic  
16079597\_Bacillus\_subtil  
118444753\_Clostridium\_novyi  
15605955\_Aquifex\_aeolic  
32475869\_Rhodopirellula\_baltic  
76261232\_Chloroflexus\_aurant  
94985469\_Deinococcus\_geothe  
116625754\_Solibacter\_usitat  
66807387\_Dictyostelium\_discoi  
118402077\_Tetrahymena\_thermo  
116061814\_Ostreococcus\_tauri  
CM1685\_Cyanidioschyzon\_merolae  
24213805\_Leptospira\_interr  
Jakaba\_bahamensis  
28872782\_Homo\_sapien  
21674804\_Chlorobium\_tepidu  
30690642\_Arabidopsis\_thalia  
34540755\_Porphyrromonas\_gingiv  
126663275\_Flavobacteria\_bacter  
110638221\_Cytophaga\_hutchi  
119885210\_Thermotoga\_petrop  
108759982\_Myxococcus\_xanthu  
34581161\_Rickettsia\_sibiri

QTILSAAQQLVVGCFEAERYPVDLFFGTGKYSQAGKILNYSKPYAYVKV  
DALLAADRAVAVGCLAERYGADAVLGFDAFYSIGHELLTAGPVAALKI  
DYLHLIDAKIIVTGCMTSNHIIHYLLGSDVENILSAISTPKHYAYLKV  
GVLKELAGQRLIAAGCMAQSHPVDTALGTQQTQINALVTHQTPSAYLKI  
EAILAAKTKIIVTGCCLAQRYAADVIVGFENYGNLPRVTIPRHYAYLRV  
SAILEAAAARLVVTGCMARQYAVDAVIGFAAYNQLAEQILGASHTAYLRV  
EVIGEATAGKVIIVTGCMTGVEE-VLAVTGPQQYEQVVTAULTPRHYAYLKI  
SAIGEALDGKVIIVTGCCLGER-PVAATGSEAVDDVMAHVLTTPRHYAYVKI  
DEIFSFVDYKLVVKGCLVQRYVVDQWIGVADPEEIANAILERPAYYVKI  
DTILEMAEKKLIIVAGCLVERYRVDALIGTNELDSIVDICATPRHFAYMKI  
DTILEMAKKMIIVATGCLTQRYSIDIMLGVNDYANIQNYITTAHMAYIRI  
AAIDEMLARNVVVTGCLAERQQIDALVGVFGRNDIVSVVVTTPRHFAYLKI  
DSILEMAEKTLVVTGCLSQRYGVDHFLGTSAYAQIGDLLSMPKYTAYLKI  
DAILEAAQQLVVGCMVPRYGDALVGTADYPRIGEVVATPYATYALKI  
RTLIGLAEKELIIVAGCLAQHFQAKAIVGTGDYQHVIVDLTTPQAVAYLKV  
RTLVELAEKKIIVISGCLAQHFQAVAVVGTGDYQNVIDIITNEAIAYLRV  
ETILEFAEKVEIVMGCLVERYKVKAYFGTESWNEILNVLSTPRSYAYLKI  
DETLLAATIGSVVMGCLVELYRIDGLFGTRELPEVLAAILTPRHYAYLKI  
NTILEMVEGSLYVMGCLSERFRVDAVYKGFQKDWQLISHLTTPRHYAYLKI  
NTILEYVDDKVEVTGCLSERVVDQYFGTTELPLLLKALTTPKNYAYLKI  
DTILRYIDDKIIVVSGCLSQRYKVDVAFSGNELPAILKKTTPSHYAYVKI  
RLIKSIRNAKIIVTGCFAQLSPVDMVLGIDEXKHIVDHIIFNDRTRSYIKV  
QTIIRRVHRARILVTCGYAQRAPVEWVVGNSHKTQIAEIVAGDRTRPNLKI  
QAIRKAKLKIIVTGCQAQTSVPVQVIGNEEKL-LPNYFYDCKSRAPIQV  
HAVRQLCRAHIVVTGCLGSDKQCTLVSNKEKSRLEKIFEGKSRAPIKV  
NTRINAIGSVVVTGCVYAEVTRVAGVVGNTREKSLPAMIIPNGHTRAYLKI  
QQIRKIIVRSRVGVIIVGCVYQQLDVPVSVFLGTTDKFEIAWYDEKGRTRAFKI  
NMLRRRAKAKVIVTGCYAQTSVDFVINDKNKSNIVNVLDRMTRAYVVKI  
NAIRKHLKALMIVTGCYAQLKPVDIVLGADEKLDLVSILADERTRHFLKI  
QIVKAMKAFVAAVGCVYQQLKPVVLDVLDVLADEKFKITDYIFGDRTRAFKI  
KVVKEALRAFVGIIVGCVYQQLKPVDAVLADEKFKLPELLVNDTRTRFLKV  
QVVRRLNRAIVVVMGCVYATRAPVEVLDKRELGDLMGRFFAGRKRAYVVKV  
QVIRRAIRGVIIVTGCYAQTSVPDIVVGTQDREKMLGYIFIDRTRAFKI  
QMLSRAKRSIIAAVGCYQIAPVDVILGTRNKGDIVVWYQDKTRAFKI  
QAIYQAKRAIVVATGCVYQVNPVLDVVGNTKSELLILYFEGVPRPFLKV  
SALGKLEKTIIVGCMQAQKQVDMVVGPGQLHAIPDMLRPTFPQAYLRI  
GKLGELVTRIVLWGMVGPNNVDHVFVSPSAVDEVVAL-SHPVSVHVPI  
SLLGDLRKLIVGMMGCLAQLEEVVLDLGGPSLLDIGKALPQGLQAHILT  
NRLQNFRRKIFVGLGCVAQQEGVSLVAGSASYTRLPEMLRDNPHRAYLTI  
LRLTELRALIVGVLGCMARLKVDIVVGPDAYRSLPSSLDNQVSAYVSI  
KRLENRALITGVLGCMARLKVDIIVGPDAYRDLRPLINPDSQAEVSI  
TRLRQLRARAVGVLGCMARLKVDMVVGPDAYRDLVRLDPMSPQAYVSV  
QRLSMLRARILGVLGCMARLKVLDVVGPDAYSRLPLLLDHLITAYVSI  
NRLQSLGLVIGVLGCMARLGLDLVVGPDAYSRLPELIVVNGIQAFVTI  
-----  
NRLHQLKALRIGILGCMARLKVDIIVGPDAYRDLRPLLSASATSFAVSI  
NILMHLKGLVIGVLGCVQFERVDFIVGPDNYRELGLVRAVSIISAFLPV  
QRLNYFVFPKVVVVGCMARLKVDDVVGPDAYRDLRPLLSSENSITAFVSV  
NRLAYHSLVIGVLGCMARLKVDDVVGPDAYSRLDPLNVLGGVHINGVSI  
KRLEKYNAMKVGVLGCMARLKVDMVVGPDAYRDLNLLNSNGVNAFVSI  
HRLVHFKGMIVGVLGCMARLKVDMVVGPDAYRDLNLSIGDGVSAFVSI  
SELGQMLKLVVGVAGCVAEKERADFLVGTARVLKVEAVRSKHHAVVTI  
SALGRYKPALIVGVCVAQEQKLDVFPDNIARLPDIISRGKVFTEFVTV  
SELGRICKAIIIVGVCVAQAEQVDIVVGPQSYNLPPELIYQGTSAFISV

94417083\_Pseudomonas\_aerugi  
CM4402\_Cyanidioschyzon\_merolae  
33862596\_Prochlorococcus\_marin  
16329745\_Synechocystis\_sp.  
111225071\_Frankia\_alni  
19703810\_Fusobacterium\_nuclea  
15605821\_Aquifex\_aeolic  
118443818\_Clostridium\_novyi  
51892897\_Symbiobacterium\_therm  
16078764\_Bacillus\_subtil  
71075619\_Giardia\_lambli  
13542169\_Thermoplasma\_volcan  
71029160\_Theileria\_parva  
71661088\_Trypanosoma\_cruzi  
93277076\_Homo\_sapient  
118373032\_Tetrahymena\_thermo  
116056662\_Ostreococcus\_tauri  
18409989\_Arabidopsis\_thalia  
121522286\_Methanococcus\_maripa  
18978284\_Pyrococcus\_furios  
15920732\_Sulfolobus\_tokoda  
119871859\_Pyrobaculum\_island

SKLGMWRDLVIGVGGCVASQEGVDVVFGPQTLHRLPEMIRVDGPTAFVSV  
SFLGPFVRLKLVAGCVAQOQEGLDLVMGPQYANRLADLLRQSQVCAWVNI  
SYLGRQARLKLVVAGCVAQOQEGLDLVMGPQHANRLEALLRSTICAWVNI  
SYLGRQAKLTLVVAGCVAQOQEGLDLVMGPQHANRLDQLLRESTVSAWVNI  
GNLQGLVPMQIAVGGCLAQKDRVDVVFQTHNLHRLPVLLRASHHSAAVSI  
GKLGELKATIIIGVTGCFQAQOQEGIDIVMGNONIGRIPQAIIFSDDQASISI  
SHLGEYKALIAVAGCLAQRTGIDIMFSSFNHQLPELIRDNKYCAYVTI  
GHLGELKALILIVTGCMQOQGVDDIIAGTYNSYKLEPYIRKSDIKAFVTI  
GRIGQLPLIIGVCGCVQVEGLDLIFGTHNIHRLPELVREGDLKAWVTI  
GELGHLKALILGVCGCMSQOQESVDMIFGTHNIHRLPELLRNGKIKGVVNI  
VHVQKGLTEVVVLGGCVQPSYGISVGLTQOQLAALPRLLRANPIIDIIST  
ARIQNLRSRGKVEVIGCLAPVKGNVSVIEKDRFRSFQEVIVNAEIVSGIPI  
NYINQGLKKKIIVTGCIPQS--NISLLGIMQIEKIVYVIRKNKLIETIPI  
SMNNRVRAKPLVVAGCVPQADPDVSVIGVRNIDRVGEVIRRNRFIEIPI  
NSIKKAQEKKIVLAGCVPQAQPLSIIIGVQQIDRVVEVVRKNLPIETISI  
TIVKTYKHKPIVVAGCVPQGD RDVSVIGISQIDRVVEVVKTLPSLDLPKI  
TVLERGKAKALLVAGCVPQGDKDVSLGVTQIDRVVEAMRRNEFVEILPL  
TLITRGRSKPLVIAGCVPQGSRGVSVVGVQQIDRVVEIVRRNFIEILPI  
SRIEYFKSKVVVAGCMAKALPADVLMVPREAQYSGKILSSQGLITALPI  
RRIRELDDKKVITGCLPHVNPVSAVLGVKSIDRIVQAVSPRGVHFILPI  
QRIKELKKKLI IAGCLVSSQPESSIVGAQSIDKIVEAVIFEGKISIIPI  
ARIRELVKKEILVAGCLARLRPAKLIYPSE-----YERGLIYTVPL

24213838\_Leptospira\_interr  
111225093\_Frankia\_alni  
15835786\_Chlamydomonas\_pneumo  
76258351\_Chloroflexusaurant  
116060729\_Ostreococcus\_tauri  
CM3493\_Cyanidioschyzon\_merolae  
94417985\_Pseudomonas\_aerugi  
94984483\_Deinococcus\_geothe  
119886282\_Thermotoga\_petrop  
116620691\_Solibacter\_usitat  
118443956\_Clostridium\_novyi  
32476670\_Rhodopirellula\_baltic  
108760706\_Myxococcus\_xanthu  
51892771\_Symbiobacterium\_therm  
33862448\_Prochlorococcus\_marin  
16331757\_Synechocystis\_sp.  
15606200\_Aquifex\_aeolic  
21674219\_Chlorobium\_tepidu  
34540013\_Porphyrromonas\_gingiv  
126662084\_Flavobacteria\_bacter  
110637073\_Cytophaga\_hutchi  
119885033\_Thermotoga\_petrop  
116622276\_Solibacter\_usitat  
34580504\_Rickettsia\_sibiri  
15836008\_Chlamydomonas\_pneumo  
24213088\_Leptospira\_interr  
66576257\_Chlorobium\_tepidu  
19704549\_Fusobacterium\_nuclea  
34541783\_Porphyrromonas\_gingiv  
126663485\_Flavobacteria\_bacter  
110638137\_Cytophaga\_hutchi  
32477342\_Rhodopirellula\_baltic  
16079597\_Bacillus\_subtil  
118444753\_Clostridium\_novyi  
15605955\_Aquifex\_aeolic  
32475869\_Rhodopirellula\_baltic  
76261232\_Chloroflexusaurant  
94985469\_Deinococcus\_geothe  
116625754\_Solibacter\_usitat  
66807387\_Dictyostelium\_discoi  
118402077\_Tetrahymena\_thermo  
116061814\_Ostreococcus\_tauri  
CM1685\_Cyanidioschyzon\_merolae  
24213805\_Leptospira\_interr  
Jakaba\_bahamensis  
28872782\_Homo\_sapient  
21674804\_Chlorobium\_tepidu  
30690642\_Arabidopsis\_thalia  
34540755\_Porphyrromonas\_gingiv

SDGCNRCSCFCIIPSFGRKFVESPLDDILRDTNRAIRAGAKEICLVSDQT  
SSGCDRRCFAFCIIPSRGSHVSRPADDVLAEEAWLAGEGARELVVLSSENS  
AEGCRKRCFAFCIIPSIKGLRSKPLDQILKEFRILVNKSVEKILIAQDL  
SDGCNLRCAFCIIPSRFGDMRSKPVGAVALAEAEQELVAGGVREIVLVAQHL  
AEGCDHKCTFCAIPSRGRFRSKPFGAIVDEAKALADSGVRELNLIAEDT  
AEGCDHQCAFCAIPQWRGRFRSKPFDQLVEEAHHLVERGVRELCLIAEDT  
SEGCNHSFCFCIIPSMRGKLVSRPVGDLSEAEERLVKAGVKELLVISQDT  
AEGCNHTCSFCIIPKLRGRQVSRDAGAVLYEAYRLIAGGTEKELMISQDT  
SDGCDRGCTFCSIPSFKGLRSRSIEDITREVEDLLKGGKKEILVAQDT  
AEGCDHCTFCVIPQYRGAFRSRRFESVSEATRLFQOQIREINLIGQDT  
SEGCNLLCTYCIIPKIRGKYSRSIESINEAKELANMGVKELILVQDQT  
SEGCDRLCTFCAIPKMRGKHFSPKIEQIIDEAKRLGDSGVREVVIVAQDT  
SEGCDNACFAFCIIPTLRGGQSRPIDDIVAEAKQLADSGVRELNLIAQDL  
AEGCDCACAFCSIPLMRGRHRSRPIESIVDEARRLAGMGVRELVVISQDT  
AEGCDYRCFAFCIIPKLRGDQRSRPVESIVTEAHQLAEQGVQELILISQIT  
AEGCDYRCFAFCIIPQLRGRQRSRPIESIVAEAEQLASQGVKELILISQIT  
AEGCDNRCSCFCIIPKIRGRHRSRKEIEIVDEAKFLADQGVKEICVVSQDT  
AEGCNRRCSFCIIPKIRGPYVSQPIEQLLREAAALQQGVKELNLIAQDI  
SEGCDRCSYCAIPIITGRHRSRPMEDLVEEVRMLVKHGTRFQLIAQDL  
AEGCDRCSFCIIPVMRGKHVSTPMEDLVKQAKGMAAKGTKEILIAQDL  
EDGCDNCTYCAIRLARGKIRSKPLEIFKDEFVEMVAKGYKEIVITGVNL  
QDGCNRRCSFCIIPFVGRSRSAPAAQVVEQVRALAAAR-YHEVVLSGINL  
QNGCDHCTFCIIPYGRGKRSVAIGAIAEQVKKHLVNLGKFEVVFTGVDV  
QDGCNRCSCYCIIPYLGRSRSRPAEKILAEIAGVVDQVVEVTRVAGINV  
QDGCNRCSCYCIIPQARGLVSRNYQDVLQVRFQDNGVGEIVLTGVNL  
QDGCSCFCAYSIPLARGRSRSVSLSTVLDRAQKIDADAGYREIVLTGINI  
QDGCNRCSCYCIIPFARGKRSRKKENILKEIEKLVEDGFKEIILIGIDL  
QDGCDCYHCSYCTIPKARGRSRNGSIESLVRQAEVAEAGGKEIVLTGVNI  
QDGCDCYHCSYCTIPLARGISRSRTMEGVLLKNAKEISAKGIKEIVLTGVNI  
QDGCDCYHCSYCTIPLARGSSRSDTIANIVKTAKEIAAKDVKEIVLTGVNI  
QDGCNRCSCYCIIPMVRPKLHSRSPQIEIVDEVTRLVDAGHREVILGTIHL  
QEGCNRFCTFCIIPWARGLLRSRDPEEVIKQAQQLVDAGYKEIVLTGIHT  
QDGCNRCSCYCLIPFARGAVCSKNPEIIDEVKKLAAGHFKEIILSGIDI  
QEGCNRFCTFCVIPYARGKVRSDLEKIVHQVKLLAQKGFKEVVLTGTQT  
QIGCDKFCYCVVNTTRGPEQGRSPEIIVSEARVLAEQGALEITLLGQTV  
QYGCNMTCSYCVIPLRRGRERSRPLAEIVVEVRRIVARGAKEITLLGQIV  
MRGCDHCTYCIIPVTRGPQVSRHPDDILRELDLLAAGVQEVVTLGQNV  
IEGCDKACAYCVVPTTRGPERSRTPSESVMAEARGLTEKGYTEVOLLGQNV  
MRGCNRCSCYCIIPFTRGRERSRPIIDSILREVKDLSDQGFKEITLLGQNV  
MRGCNRCSCYCIIPFTRGRERSRDIQSIVVEVKMLANQGVKEITLLGQNV  
TRGCDNRCFAFCVVPVPTTRGRERSRPFESVLEECRKLIDQGVKEITLLGQNV  
MRGCNRCFAFCVVPVPTTRGRERSRREPASIWNEIBSLGNEGFKEVLLGQNV  
MRGCNRCFAFCVVPVPTTRGRERSRDPKSIIVREVQDLVQKGIQITLLGQNV  
-----  
MRGCDNRCSCYCIIPFTRGRERSRPIASILEEVKKLSEQGLKEVTLGQNV  
MRGCNRCFAFCVVPVPTTRGRERSVGFERVAEVALEKAGFREVTLGQNV  
MRGCNRCFAFCVVPVPTTRGRERSRPVESIIVREVLEWESGVKEVTLGQNV  
MRGCNRCSCYCIIPYTRGRERSREIESILNEVRDLKAKNFREVTLGQNV

126663275\_Flavobacteria\_bacter  
110638221\_Cytophaga\_hutchi  
119885210\_Thermotoga\_petro  
108759982\_Myxococcus\_xanthu  
34581161\_Rickettsia\_sibiri  
94417083\_Pseudomonas\_aerugi  
CM4402\_Cyanidioschyzon\_merolae  
33862596\_Prochlorococcus\_marin  
16329745\_Synechocystis\_sp.  
111225071\_Frankia\_alni  
19703810\_Fusobacterium\_nuclea  
15605821\_Aquifex\_aeolic  
118443818\_Clostridium\_novy  
51892897\_Symbiobacterium\_therm  
16078764\_Bacillus\_subtil  
71075619\_Giardia\_lambli  
13542169\_Thermoplasma\_volcan  
71029160\_Theileria\_parva  
71661088\_Trypanosoma\_cruzi  
93277076\_Homo\_sapien  
118373032\_Tetrahymina\_thermo  
116056662\_Ostreococcus\_tauri  
18409989\_Arabidopsis\_thalia  
121522286\_Methanococcus\_maripa  
18978284\_Pyrococcus\_furios  
15920732\_Sulfolobus\_tokoda  
119871859\_Pyrobaculum\_island

TRGCDNMCTFCVVPFTRGRERSREPOSIIDEIQDLYDRGFKEVTTLLGQNV  
MRGCDNMCSFCVVPYTRGRERSRDAHSILNEVRELVANGYKEVTTLLGQNV  
IFGCDRFTYCIVPYTRGREKSRPMEDILEEVRELAKQGYREVTFLGQNV  
MKGCDNVCSFCIVPHTRGREVSRAPDVLVEVADLAKVGVREVTLLGQNV  
QEGCDKFCVVPYTRGAEFSRNVQVFRALKVSSGAKEMILLGQNV  
MEGCSKYCSFCVVPYTRGEEVSRPFDDVIAEVIHLAENGVEVTTLLGQNV  
SYGCNERCTYCVVPYTRGLEQSRVESIVNEVVQLKNEGYREVTLLGQNI  
IYGCNERCTYCVVPSVRGKEQSRSPPEARLEIEGLAARGFREITLLGQNI  
IYGCNERCSYCVVNPVNRGVEQSRTPPEAIYGEVLAQQGFKEVTTLLGQNI  
SVGCDNTCTFCIVPSLRGRERDRPGDVLAEVEALVGEALVITLLGQNV  
TYGCNNFTFCIVPYVRGRERSVPLEEIVKDVQYVKKGAKEIVLLGQNV  
IKGCDKNCTYCVVPRTRGKERSRALHSILDEVKRLVDDGVREIHLGQNV  
MYGCNNFCSYCVVYVRGRERSRDPQNIIDEIKDLVSKGYKEITLLGQNV  
MYGCDKHCTYCVVPTTRGKERSRPEVILAEVQELARQGFKEITLLGQNV  
MYGCDKFTYCVVYTRGKERSRPPEDIQEVRRRLASEGYKEITLLGQNV  
GSGCMGCTYCKTCHSRGRLRSVPLDTLLARIRSSLLADIIRELWLTGEDT  
NQGCTGKCNFCVSHIARGKLVSRKPEKIAGQIKILLQRGIKEIKITSLDT  
STGCLGCTYCKTKHARGVLSYEIESILDRVESCISEGVKEIWLTSDEL  
SVGCLNHCTYCKTKQARGDLRSWPIESIVLVRVSVLKEGVKEIRITSEDEV  
NTGCLNACTYCKTKHARGNLASYPIDELVDRAKQSFQEGVCEIWLTSEDT  
R--CLGCTYCKTKHARGKLSYQPEAVNVRVKTVCCEGVKEIWLTSEDT  
STGCLGCTYCKTKHARGDLGYSYISALVSRVEQAISEGVSEVWLTSEDT  
NVGCLGACTYCKTKHARGHLSYTVDSLVERVRTVISEGVKEIWLTSEDT  
CEGCLGCTYCVKVRARGNLASVDRDLIVKKAELVKTGTCKLLVTAQDT  
AEGCLNGCTYCATRSARGVLSYSPEKIVVWVWKAIRQGYKEIWLTAEDT  
ADGCAGDNFCITKLARKKLSYPPRNIVNAVKEAVQKGAVEIWLTAQDT  
QVGLGNTFCATKYTRGYVKSADPDDVVRHIKEAVAKGAREIYLTGQDV

24213838\_Leptospira\_interr  
111225093\_Frankia\_alni  
15835786\_Chlamydomyxa\_pneumo  
76258351\_Chloroflexus\_aurant  
116060729\_Ostreococcus\_tauri  
CM3493\_Cyanidioschyzon\_merolae  
94417985\_Pseudomonas\_aerugi  
94984483\_Deinococcus\_geothe  
119886282\_Thermotoga\_petro  
116620691\_Solibacter\_usitat  
118443956\_Clostridium\_novy  
32476670\_Rhodopirellula\_baltic  
108760706\_Myxococcus\_xanthu  
51892771\_Symbiobacterium\_therm  
33862448\_Prochlorococcus\_marin  
16331757\_Synechocystis\_sp.  
15606200\_Aquifex\_aeolic  
21674219\_Chlorobium\_tepidu  
34540013\_Porphyrmonas\_gingiv  
126662084\_Flavobacteria\_bacter  
110637073\_Cytophaga\_hutchi  
119885033\_Thermotoga\_petro  
116622276\_Solibacter\_usitat  
34580504\_Rickettsia\_sibiri  
15836008\_Chlamydomyxa\_pneumo  
24213088\_Leptospira\_interr  
66576257\_Chlorobium\_tepidu  
19704549\_Fusobacterium\_nuclea  
34541783\_Porphyrmonas\_gingiv  
126663485\_Flavobacteria\_bacter  
110638137\_Cytophaga\_hutchi  
32477342\_Rhodopirellula\_baltic  
16079597\_Bacillus\_subtil  
118444753\_Clostridium\_novy  
15605955\_Aquifex\_aeolic  
32475869\_Rhodopirellula\_baltic  
76261232\_Chloroflexus\_aurant  
94985469\_Deinococcus\_geothe  
116625754\_Solibacter\_usitat  
66807387\_Dictyostelium\_discoi  
118402077\_Tetrahymina\_thermo  
116061814\_Ostreococcus\_tauri  
CM1685\_Cyanidioschyzon\_merolae  
24213805\_Leptospira\_interr

VYGRDSELDMVRKVAEISLEILRLLYLPDKKTEKLIRLMGETIAPYL  
TSYGKDLGLEKLLPQLAAVGIVRVRTVYLQPAELRPSLLEVLTTLAPYL  
GDYGKDLSESLHLELKEGDYWLRLMLYLPDEVSDGIDIDMQSNLLPYV  
TDYGRDGLATLLAELCQVPEWTWIRLMYAYPHGISERLITTMASYICHYL  
NQWGMDLRLAELLYALAEVGEIEMRILYAYPSYFSDLELIQAIRTX-----  
NMYGMDRGLAELLYRFQREGLVWIRLLYCYPSYFSDLLIAAIAECVRCI  
SAYGVDLKVKTRMKELCEAMGVVWRLHYVYPYVNVDDVPLMAAGLLPYL  
SAYGMDLRLIDLAEKLGEM-GAWVRMHVYYPYPHVERIVELMSRGTILPYL  
TSYGIDLYLPDLLRRLNSLGEFVIRVMYLHPDHLTEEISAMLELVVKYF  
TCYGEDGLAELLLARLAIQEKWIRFLYAYPNKVTQKLLDTLAEHLAKYI  
AIYGSDLYLSQLLRELSNIDIEWIRILYTYPEEITDELIEEKNNVCKYL  
TYGMDLRLAELLLKELDKISIDWIRLMYFPMYIDDALIDITLMSAIVPYI  
TAYGHDLPLHLLKALVQVDVKWIRLHYAYPRIFPDELIEVMASEIARYL  
TYGDLLYLARLLRELAQVGIWRIRIHYSPTRITDELIEIVTEVLNLYL  
TNYGLDLYFAELLQALGEVDIPWVRVHYAYPTGLTPEVLAAYREVLRYL  
TYGMDLRLAELLLKELDKISIDWIRLMYFPMYIDDALIDITLMSAIVPYI  
TYGKDLYLVELLEKLEKVGKIRWIRLLYLPTEVHEDLIDYVANSVLPYF  
SVYGYDLYLNDLTLRLSDMGFNWIRLLYAYPLNFPLEVISMTRERVNYI  
TFYGLDLYLAELTARLSDIGVEWLRHYAYPAQFPDLPVMRERVCKYL  
TYGMDLRLAELLLKELDKISIDWIRLMYFPMYIDDALIDITLMSAIVPYI  
TYGDLIYLSDLLKNSDVGIDWIRLQYAYPSGFPLDVLVMAERICKYI  
GKYGDMGLAELLLKVEKVGDIYRVLSSINVEDVNDIEVAFKRNLCPHL  
GRWGREPGLAGLLRLLAEDVARLRLSSVEPMDFSDELHLMAASIANHV  
TAYGSDLFPAQMIKRVLNLELRLRLSSIDVAEIDDELFEIAYSIMPHF  
GDYCDGERLASLIEQVDQIGIERIRISSIDPDDITDLHRAITSSSTCPSS  
GWRVDSENFNKILGEILNIEYSRIRISSIEPPDVGNELVELMTHPFPFL  
GDYQDGTLSGLLRRLETIDVSRIRISSVEPQLLDELIDIVAAISIMPHF  
SAYGEDFEFESLLEDILRIDLKRVRIGSVYDPKIDTRFIELFKNKMLPHL  
GDFGRSTGFLDLRLALDQVGIERYRIGSIEPNLLSDELIDFCASAIAPHF  
GDYGKGEFFLDLVTLELDKVGIERLRISIEPNLLKNETIELVSKSFVPHF  
GDYGIISGFLDLIKELDKVGIERFRISIEPNLLTDEIISFVTSFVPHF  
GHYGVWNLHLVKDLQIGQFRIRMSSIEATEVTRELIGVMAEFVPHL  
GGYGEMKFAKLLSELDRGVRIRIRISSIEASQITDEVIEVLDRSIVNHL  
SSYGVDELLETTILKKIDEIGITRVRIGSIGPEFFNEDRIKEIGKLLCPHF  
SQYGDWKLTYLTELKIGIELIRLSMHEKEMDKELLKLVSEIAPHF  
NSYRHRGPMAGLLERLHDIGLKRIFVNTNPKDMTARLLETIRDVSPYL  
DSWGHDLPLADLLEAVDPTGLLRLRFLTSHPAWMTDRLIETVARLQCEPI  
NAYGVQGFANLLRLVGRSGIRRVKFTTSHPMNFTEVAAAMAETVCEYV  
NSYRDPSPFATLLAKVAEIGMRRVRYTSHPRDFVRPVDAMDANICDHI  
NSYEESENFTKLMELVSKVPEIRIRFTSPHPKDFPDDLELKNQICKQL  
NSYFDKEAFALLEEVAKAPEVFRFRFTSPHPKDFPDPVLOVICKYIAKQL  
NSYADASEFADLVEAVAAIVECRVRFSTSPHPKDFPDDLLRVIANTVCKNL  
NSYCYQSDFADLLEGVCEIHSRMRVRYTSPHPKDFPHEVLRLYTRYLCRQI  
NSYKEQDTFAGLIQMLLEDESIERIRFTSPHPKDFPHTLLQMSENFCPI

Jakaba bahamensis  
28872782\_Homo\_sapien  
21674804\_Chlorobium\_tepidu  
30690642\_Arabidopsis\_thalia  
34540755\_Porphyrromonas\_gingiv  
126663275\_Flavobacteria\_bacter  
110638221\_Cytophaga\_hutchi  
119885210\_Thermotoga\_petro  
108759982\_Myxococcus\_xanthu  
34581161\_Rickettsia\_sibiri  
94417083\_Pseudomonas\_aerugi  
CM4402\_Cyanidioschyzon\_merolae  
33862596\_Prochlorococcus\_marin  
16329745\_Synechocystis\_sp.  
111225071\_Frankia\_alni  
19703810\_Fusobacterium\_nuclea  
15605821\_Aquifex\_aeolic  
118443818\_Clostridium\_novy  
51892897\_Symbiobacterium\_therm  
16078764\_Bacillus\_subtil  
71075619\_Giardia\_lambli  
13542169\_Thermoplasma\_volcan  
71029160\_Theileria\_parva  
71661088\_Trypanosoma\_cruzi  
93277076\_Homo\_sapien  
118373032\_Tetrahymena\_thermo  
116056662\_Ostreococcus\_tauri  
18409989\_Arabidopsis\_thalia  
121522286\_Methanococcus\_maripa  
18978284\_Pyrococcus\_furios  
15920732\_Sulfolobus\_tokoda  
119871859\_Pyrobaculum\_island

-----FTSPHPKAFPDALLHLMRERVCKQI  
NSFRDNSEFAHLLDQVSRVPEMRIRFTSPHPKDFPDEVLQLIHERICKQI  
NSWRDAEKFAGLLEGVSLAPSMRIRFTTSHPKDISEALVKVIAARLNCHI  
NSYNDSDAFADLLDRLSVEPEMRFRFTSPHPKDYDPELLYLMRDRICNLI  
NSYRYEQNFDDLAAVAEAPDMRIRFTSPHPKDMDEAIAVMARYICNHI  
DSYGGGLKFAQLLDKCATLPKMRFRFTSNPQDMHEVLHVIAKHICNYI  
DSYKWSAEFAQLLRLVVALVPLDRLVRFSTSHPKDITDEVLYTMKKYICNSI  
DAYGKDLKLAKLLEASKIGIERIWFLLTSYPTDFSEDELIEVIARNVAKSV  
NSYAGGISFAQLLLRTAEVGIERVRFSTSHPHDLSEDELIEAFRVQITPHF  
NAYHGKGPLADLLKHLAQINLERLRYTTSHPIDMNDLIKLYGTELMPPFL  
NGFRGQTHFAELLRVVAAVGIERIRYTTSHPLEFSDALIQAHAELVVKFI  
DAYGRDMRFAQLLRHVSATGIDRIRAITAHPRYWSPRVIOATAELIMPYF  
DAYGRDLPLDILLHHIHVDVGIERIRFATSHPRYFTTERLIEACFDLVCHEF  
DAYGRDLPLDILLYHVHDIGIDRLRFATSHPRYFTTERLIQACQELVCEHF  
NSYGRSLGFAKLLACGRVGLERVRFSTSPHPRDFTDDVIEAMATVCHQL  
NSYGKDFKFAKLLDEICKVGDYIVRFVSPHPRDFTDDVIEVIAKNIKSKCL  
TAWGKDFEFSELYQVSKIGVERIRFTTGHPRDLTDDIIEAMADIVCNAL  
NSYGKGLFATLLRMVNIKIGLERIRFMTSHPKDVSDELIKAMAECVCEQG  
NAYGKDLVYFGDLIELIDRNGIERIRFTTSHPKDFTRKMVEQIARAVCEWF  
NAYGKDFELGDLMDLKRKIDIPRIRFTTSHPRDFTDDRIEVLAKGLLDHI  
LAWGRESDFAVLLQEVQKLTHKMLKIGMTDPDNDQESLISFMRCKVYKFL  
AAYGKDLGLPHLLIRTITEIDDFRLRVGMMEPKEIVDDLISAYRHPVFKFL  
GAYGIDLGIITLLHSIIAVKDIMLRLGMCNPPKYISEVCEILRHEVFEFI  
GAYGIDINIICLLRAIVKETEVMRVMGSMNPPRHLDFAALLRHPVVEFV  
GAYGRDIGLPTLLWKLVEV-GAMLRGLMTNPPPEHLEEMAKILNHPVYAF  
GAYGRDIGLPTLLRRLIVEV-DVMLRVGMNPPPEHLQNMSTILRHPVSFL  
GAYGIDLVAALFRAITAVGSVMLRLGTMNPPAHLDAVAEAMRHPVYAWM  
GAYGRDIGLPIILLNAIVKEQSTMLRIGTMNPPPEHLKEIAAVLRHPVYTF  
ACYGLDNLPLNINDISEIEKFAIRIGMMHAKPILDELIESFKSKVVKFL  
GCYGFDIGLAKLLDEITAIGEFRIRVGMNPNKFLDELIEAYKDEVYKFL  
AAYGLDINLVLLKEILEIGNYIMIRIGMMPKQIDEILEIKDKVYKFL  
ITYGFDAGLPDLLDRILKEGEYRVIRIGMSEPWFVQQLDDIKRDVYRYF

24213838\_Leptospira\_interr  
111225093\_Frankia\_alni  
15835786\_Chlamydomyxa\_pneumo  
76258351\_Chloroflexus\_aurant  
116060729\_Ostreococcus\_tauri  
CM3493\_Cyanidioschyzon\_merolae  
94417985\_Pseudomonas\_aerugi  
94984483\_Deinococcus\_geothe  
119886282\_Thermotoga\_petro  
116620691\_Solibacter\_usitat  
118443956\_Clostridium\_novy  
32476670\_Rhodospirillum\_baltic  
108760706\_Myxococcus\_xanthu  
51892771\_Symbiobacterium\_therm  
33862448\_Prochlorococcus\_marin  
16331757\_Synechocystis\_sp.  
15606200\_Aquifex\_aeolic  
21674219\_Chlorobium\_tepidu  
34540013\_Porphyrromonas\_gingiv  
126662084\_Flavobacteria\_bacter  
110637073\_Cytophaga\_hutchi  
119885033\_Thermotoga\_petro  
116622276\_Solibacter\_usitat  
34580504\_Rickettsia\_sibiri  
15836008\_Chlamydomyxa\_pneumo  
24213088\_Leptospira\_interr  
66576257\_Chlorobium\_tepidu  
19704549\_Fusobacterium\_nuclea  
34541783\_Porphyrromonas\_gingiv  
126663485\_Flavobacteria\_bacter  
110638137\_Cytophaga\_hutchi  
32477342\_Rhodospirillum\_baltic  
16079597\_Bacillus\_subtil  
118444753\_Clostridium\_novy  
15605955\_Aquifex\_aeolic  
32475869\_Rhodospirillum\_baltic  
76261232\_Chloroflexus\_aurant  
94985469\_Deinococcus\_geothe  
116625754\_Solibacter\_usitat

ESPLQHVSSKILKVMNRTGESSYFKDLFSLAREVKGPLEIRTSFIIGYPG  
DLSFQHASPAVLRMRFRGGSEHFLDLDLDRGRGLPLGLGARSNVIVGFP  
DIPLOHINDRILKMRRTSREQLIGFLEKLRKAVPQVYIRSSVIVGFP  
DMPLOHAPATLRRMRPPDTRTLRIIAELRAAMPDIAIRSTFIVGYP  
-----XXXXXXXXLDRIPGLALRTTFISGFP  
DIPLOHASDAVLRMRPL-MSHTSALLNKLQRIPNLKLRSTFISGTP  
DIPFQHASPKVLKMRPAFEDKTLARFKHWREICPELTIRSTFIVGFP  
DVPLQHASPAVLRMRPGAGKQ-LDTRRWREICPELVIRSTFIVGFP  
DVPVQHGSDKILKLMGRTKSSEELKMLSSIRERFPDAVLRISIVGFP  
DMPLOHASANVLKMRKRGASGDFLKLIERIRRTIPGVAIRSTFIVGFP  
DIPLOHINDRILKMRKRSKELITDNIKKMRKEIDGLCLRTSIVGFP  
DMPLOHASDKMLKMARKTTRSLQTDIVQKLRSDLSVMRTTMITGFP  
DMPVQHVSDKLLSMKGRNSEFLKGLLTKLRERVPGLVMRTSLIVGLP  
DLPLQHGSRNVLKMRPANAEGYLRVLQKLRERVPDILCRSTFIAGHP  
DLPLQHSHSEVLRAMNRPWQTDVNERLLDRIREQLPDAVLRITLIVGFP  
DLPLQHSHPDILRAMNRPWQGVNDIITRLKTALPDAVLRITLIVGFP  
DVPLQHVSDRVLKDMRGRYDGFVRNLIENIRKKIENAVFRITFIVGFP  
DMPLOHINDRILKMRGIGRQATEQLIDDIRQKNDIRLRTMIAGYPG  
DMALQHISDPLGRMRRITKAETYELIERIRTEVPGIHLRITLMTGHP  
DIPLOHISDNILKSMKRGTTKEKTKLLQEFREVRVGMAIRITLIVGFP  
DMPLOHGSSDMLKMRGIDRPKTEDLIKTIRDKVPGIAFRITMIIGHP  
HISVQSGSDVLRKMRKRYRISDFMRVVDKLRSIDDFISITDIIIVGFP  
HAPLQSGSDRVLRRMRKRYRPRHYADRVLKRALMPDGAIGADVMVGFPG  
HISLQAGDDMLKMRKRRHRANVIEFCKLRRAIRPEVSFGADIIAGFP  
HLVLQSGSNSILKMRNRKYSRGLDLCVEKFRASDPYAFITDVIIVGFP  
HIPLOSGNSEILKMKRKYTPETFRKRVEIAKEKIPNLFLGTDIIIVGFP  
HLPLQSGSDTVLRAMRRHYDTAFYRERLMKALSIRGCAIGADVMVGFPG  
HISLQSCDDTVLKNMRRNYGSSLIKSLKLSKVKDMFEADVIIVGFP  
HMPLOSGSDVLRKMRRYDTALFRERVEHIRRALPHAFIGIDVIVGFP  
HIPLOSGSDILKMKRRLRELYVDRVNRKIREVMPHACIGVDVIVGFP  
HIPLOSGNDKILKMRRYKRELYAERVEAIKVMPHACIGVDVIVGFP  
HLCLOSGSDVLRMRRRWGTMLDRCLLRESLDRPAITDIIAGFP  
HIPLOSGSNVTLRKMRKYTMEFFADRLNKLKALPLAVTSDVIVGFP  
HLSLQSGCNETLKRMRKYTTEEFENVVLLRKYIKDISITDIIIVGFP  
HLSLQSGSNRILELMDRGYTTREYEEVVFIVENRPISSIGTDVIVGFP  
HVPAQSGSDAVLRKMRGTYTIADYMEMFERIETVLPPEASVSDFIVGFP  
NLPVQSGSDRVLKMRGTYTVARYKTLIARAAIPDISLTTDIIIVGFP  
HLPVQSGSNRVLRRMAREYTRKYLSHIAEIRRHLPDVLATDIIIVGFP  
HLPVQSGSSKVLAAAMDRLYTRDEYLRIDWIKSAKRRYSLTTDIIIVGFP

66807387\_Dictyostelium\_discoi  
118402077\_Tetrahymena\_thermo  
116061814\_Ostreococcus\_tauri  
CM1685\_Cyanidioschyzon\_merolae  
24213805\_Leptospira\_interr  
Jakaba\_bahamensis  
28872782\_Homo\_sapien  
21674804\_Chlorobium\_tepidu  
30690642\_Arabidopsis\_thalia  
34540755\_Porphyrmonas\_gingiv  
126663275\_Flavobacteria\_bacter  
110638221\_Cytophaga\_hutchi  
119885210\_Thermotoga\_petrop  
108759982\_Myxococcus\_xanthu  
34581161\_Rickettsia\_sibiri  
94417083\_Pseudomonas\_aerugi  
CM4402\_Cyanidioschyzon\_merolae  
33862596\_Prochlorococcus\_marin  
16329745\_Synechocystis\_sp.  
111225071\_Frankia\_alni  
19703810\_Fusobacterium\_nuclea  
15605821\_Aquifex\_aeolic  
118443818\_Clostridium\_novyi  
51892897\_Symbiobacterium\_therm  
16078764\_Bacillus\_subtil  
71075619\_Giardia\_lambli  
13542169\_Thermoplasma\_volcan  
71029160\_Theileria\_parva  
71661088\_Trypanosoma\_cruzi  
93277076\_Homo\_sapien  
118373032\_Tetrahymena\_thermo  
116056662\_Ostreococcus\_tauri  
18409989\_Arabidopsis\_thalia  
121522286\_Methanococcus\_maripa  
18978284\_Pyrococcus\_furios  
15920732\_Sulfolobus\_tokoda  
119871859\_Pyrobaculum\_island

HIPAOQSSSKVLESMRRGYTRESYIELIDTIKRVLPGCAISSDFISGFCG  
HMPAQSGNTEMLTRMRRNYSRENYINLVDHIKQITIPGITLSSDFICGFCG  
HMPAQSGSTLSTLERMRRGYTREAYLELIERAREIIPGVAISSDFISGFCG  
HVPMQSGSSEVLRRMRRGYTREYLLALVARIRDVADVALSTDIISGFCG  
HLPQAGNTRVLEEMKRSYSKEEFLDVVKEIRNIVPDVIGITTDIIVGFPN  
HLPAQSGSTAVLHRMRRFYSREAYIELAERIRELIPGVALSSDFIAGFCG  
HLPAQSGSSRVLEAMRRGYSREAYVELVHHIRESIPGVLSDDFIAGFCG  
HLPVQSGSSRMLDLMKRGHTREYLDRIAMIRSYIPEVAITTDLIAGFCT  
HLPAQSGNSRILEQMRRGYTREAYLDLVKKIRSIIPDVAITSDFITGFCG  
HLPAQSGSDKMLRVMKRGYTRRWYLDRAAIRAIPDCAISSDLFCGFHS  
HLPVQSGSTRILKEMNRQHTREYEMALIDKIYSIIPDISLSDMIAGFPT  
HLPAQSGNTRILELMNRYTREWYMERITKIRQILDCCGSSDITAGFCS  
HLPVQSGSNRILKLMNRSYTKEEYLALLERIRSKVPDVAISSDIIVGFPT  
HLPVQCGSDRILKMMRDYTVVQYLERLAKLREARPGIAVTTDIIVGFPG  
HLPVQSGSNRILKAMNRKHDREYFDIHRLEARPDIVLSSDFIVGFPG  
HLPVQSGSDRVLAAMKRNHTVLEYKSRIRKLAAPDICISSDFIVGFPG  
HIPFQAGDDEVLKAMGRGYTAKRYRRIEMIREYLPDAAITADAIIVGFPG  
HIPFQAGDNDVLKAMARGYTVERYRRIVNRIRELMPDAAISTDVIIVGFPG  
HIPFQAGDNDILKAMRGYTRKYLQIEKIRRYMPDAAISADVIIVGFPG  
HMPVQSGSDVLRMRRSYRRDRFLGLIVERVRAAMPDAAITTDIIVGFPG  
HLPVQSGSSQILKMMRRGYTKEKYLALVDKIKSKIPGVALTADIIVGFPG  
HLPFQAGSDNRILALMDRGYTKEEYLEKLEKLEKVDIAMSTDVIIVGFPT  
HFALQSGSTEILQKMNRYTREDYTLVKKLRKAMPNVGISTDIIIGYGP  
HLPVQSGSDSVLRMRRSYNRKQYLRVGVWIRELIPDAVITTDIIVGFPG  
HLPVQSGSSEVLKLMARKYDRERYMELVRKIKEAMPNASLTDIIVGFPG  
HLPVQSGSDRILTLMRHYDIETFLRSCSKLQSAVPLCLDPTDIICGFPG  
HLPVQSGDDYVLEVMNREYTVSDFIRITGKFRFAFPDSTLSTDLIIGYYA  
HIPVQSGSDSVLEKMNREYKLEDFLHVSVIKEKVPNCTIATDIICGFPT  
HIPVQSGSNRILNAMQREYTLLEEFYECVHRIRSVVNPVTLATDIIICAFP  
HIPVQSGSDSVLMEMKREYCVADFRRVDFLKEKVPGITIATDIICGFPG  
HIPVQAANTVLENMREYTCFEFEQVCDYLLKNVPMNTIATDIICGFPG  
HIPVQSGSDSVLEAMKREYTVVEEFRTVCDTLEAVPGMVIATDVIICGFPG  
HVPVQSGSDSVLTAMNREYTADEFRTVVDLTLELPGMVIATDIICGFPG  
HLPVQSGDDQVLKDMNRYTVDEYISVLEFNSKIKNLFNTDVIIVGFPT  
HLPVQSGDNEILRRMGRYTVVEEFEEIVNAFRREFPDNLNHTDIIIVGFPG  
HLPVQSGDDRVLKLMNRYTVDEYRELVKEIRDKIPIVNTTDIIGHGP  
HLPVQSGSDKVLVAMGRKYTVVEEYRGLIRRIRELDNVFIATDIIVGFPG

24213838\_Leptospira\_interr  
111225093\_Frankia\_alni  
15835786\_Chlamydomyxa\_pneumo  
76258351\_Chloroflexus\_aurant  
116060729\_Ostreococcus\_tauri  
CM3493\_Cyanidioschyzon\_merolae  
94417985\_Pseudomonas\_aerugi  
94984483\_Deinococcus\_geothe  
119886282\_Thermotoga\_petrop  
116620691\_Solibacter\_usitat  
118443956\_Clostridium\_novyi  
32476670\_Rhodopirellula\_baltic  
108760706\_Myxococcus\_xanthu  
51892771\_Symbiobacterium\_therm  
33862448\_Prochlorococcus\_marin  
16331757\_Synechocystis\_sp.  
15606200\_Aquifex\_aeolic  
21674219\_Chlorobium\_tepidu  
34540013\_Porphyrmonas\_gingiv  
126662084\_Flavobacteria\_bacter  
110637073\_Cytophaga\_hutchi  
119885033\_Thermotoga\_petrop  
116622276\_Solibacter\_usitat  
34580504\_Rickettsia\_sibiri  
15836008\_Chlamydomyxa\_pneumo  
24213088\_Leptospira\_interr  
66576257\_Chlorobium\_tepidu  
19704549\_Fusobacterium\_nuclea  
34541783\_Porphyrmonas\_gingiv  
126663485\_Flavobacteria\_bacter  
110638137\_Cytophaga\_hutchi  
32477342\_Rhodopirellula\_baltic  
16079597\_Bacillus\_subtil  
118444753\_Clostridium\_novyi

EPEPVDQILRFIEDTRPEKVNLFSSYPOEGTKGAQVSEKEKSKRINLIR  
ETEADVDILAEFLEAAELDAVGVFVGYSDDEEGTEAVSIAEEEIERRRVQIT  
ETQEEFQELADFIGEGWIDNLGIFLYSQAANTPAAEIPEKVKESRLKILS  
ETTAEFHALLEFLQTAQLDRVGAFRYSREPPTAAEVRPQVIERRWHELM  
ETEEHNEMLQFCRDFKFERLGAFAYSEEDGTPAMEVPEVDRVAFRRDQLV  
ETARDHQQLVRFIQEMRFARAGFFSYSAEERTPMAEVPVPPQERRRDLQF  
ETEDDFQYLLDWLTEAQLDRVGCFOYSPVEGAPANEVPEVQDRWERFM  
ETEDDFQLLDLDFLEEARLDRVGAFTYSVDEEADANAIPPEVQERLARFM  
ETEDDFEELKQFVEEIQDFKLGAFVYSDEEGTVAFNVDPMAKRRQELL  
ETAADFDLCAFVEAAKFDNLGVFTYSDEDTASAYAVDVRTIQRNRRLM  
ETEDFENELKEFVEEIKFDNLGVFKYSQEDTAAARVSEDLKEERLATIM  
ETEDDFVELMDFVQESRFENLGVFTYSIEEDTPAARVDPEVAARRRDLV  
ETEDDFEMLKEFVKTQRFERLGVVQYSDDEEGTAAVDVPPQLIERRWELM  
ETEDDFELLDLFLRACFDHVGVFAYSQEEGKAGQLPEEVRLARRDRAM  
ETEDDFHNLAAFIERQRFDHVGVFVTFSPEDGTAADVDPISIAAARKDRLM  
ETEHEFHGLLDFVQRHQFDHVGVFVTFSPPEEGTAAAFVPEEVMGDRRDRM  
ESEEDFKELKKEFVEEGHFHVLGVFTYSPEEGTHAYPIPREVKEERREELM  
ETRAEFELLDLFIQTRFDRLGCFPPYRHEEHASAYAVSDEEKEKRVGELM  
ETERDFEELLQFVRDIRFERLGAFTYSHESGTYCDKIPESVQERLQELM  
ETEQDFEILRDWVQEMKFERLGCFTYSHEENTGAFVVPQEVKQARAAEIM  
ETEKDFDELCSFVEEQRFDRLGAFTYSHEEHTHSYSIPQEEKEERQATIM  
ETDDDFQKTLDLVEKVGFSRVHIFRFSRPGTPASRVPESSKKERLDVVK  
ETDAEFESRRFIEQLPFTYLVHVFYSERPGTPAAEVPMPVRKERNRVL  
ETPEMDFENTRKLISEAELQYLVHVPYSEREGTPAARVPKNIKIRKARAIL  
ESDQDFEDTLRIIEDVGFIVKHSFPFSARRRKTAYTIPNQVYERKLYLA  
ETEEMFQDSVSMIRDLGFAKIHFTFPFSVRRNTLAETVSKEIKKERVHTLN  
ESERDFEEMCRFIEELPVAYLVHVFVTFSPRPGTKLFAIPSAESSSRAARL  
EDEIMFQNTYDVIKEIEFSGHLIFQYSDREGTIANSDVKTQKQRADRL  
EKPEFFEDCYSFLQDKSFSRLHVFSYSERPGTQALQVDAREKQRSRRL  
ETDEHFLETYHFLNLDLISYLHVFTYSERDNTAAEVPANVRSKRSKMLR  
ETDEDFNVTYNFLNLDLISYLHVFTYSERANTLAATFRNDRSRSTMLR  
ETEEEFQTLRTRCAGAGFSKIHAFYPSARRGTAAELDKGLISERVDRLG  
ETEEEFMETYNFIKEHKFSELHVFPYSKRTGTPAARVDENVKNERVHRLI  
ETIEEFDETYEYLKRIELSKMHIFKYSRPTGTAEKVDGNIKERSKALI

15605955\_Aquifex\_aeolic  
32475869\_Rhodopirellula\_baltic  
76261232\_Chloroflexus\_aurant  
94985469\_Deinococcus\_geothe  
116625754\_Solibacter\_usitat  
66807387\_Dictyostelium\_discoi  
118402077\_Tetrahymena\_thermo  
116061814\_Ostreococcus\_tauri  
CM1685\_Cyanidioschyzon\_merolae  
24213805\_Leptospira\_interr  
Jakaba\_bahamensis  
28872782\_Homo\_sapient  
21674804\_Chlorobium\_tepidu  
30690642\_Arabidopsis\_thalia  
34540755\_Porphyrromonas\_gingiv  
126663275\_Flavobacteria\_bacter  
110638221\_Cytophaga\_hutchi  
119885210\_Thermotoga\_petro  
108759982\_Myxococcus\_xanthu  
34581161\_Rickettsia\_sibiri  
94417083\_Pseudomonas\_aerugi  
CM4402\_Cyanidioschyzon\_merolae  
33862596\_Prochlorococcus\_marin  
16329745\_Synechocystis\_sp.  
111225071\_Frankia\_alni  
19703810\_Fusobacterium\_nuclea  
15605821\_Aquifex\_aeolic  
118443818\_Clostridium\_novy  
51892897\_Symbiobacterium\_therm  
16078764\_Bacillus\_subtil  
71075619\_Giardia\_lambli  
13542169\_Thermoplasma\_volcan  
71029160\_Theileria\_parva  
71661088\_Trypanosoma\_cruzi  
93277076\_Homo\_sapient  
118373032\_Tetrahymena\_thermo  
116056662\_Ostreococcus\_tauri  
18409989\_Arabidopsis\_thalia  
121522286\_Methanococcus\_maripa  
18978284\_Pyrococcus\_furios  
15920732\_Sulfolobus\_tokoda  
119871859\_Pyrobaculum\_island

24213838\_Leptospira\_interr  
111225093\_Frankia\_alni  
15835786\_Chlamydomyxa\_pneumo  
76258351\_Chloroflexus\_aurant  
116060729\_Ostreococcus\_tauri  
CM3493\_Cyanidioschyzon\_merolae  
94417985\_Pseudomonas\_aerugi  
94984483\_Deinococcus\_geothe  
119886282\_Thermotoga\_petro  
116620691\_Solibacter\_usitat  
118443956\_Clostridium\_novy  
32476670\_Rhodopirellula\_baltic  
108760706\_Myxococcus\_xanthu  
51892771\_Symbiobacterium\_therm  
33862448\_Prochlorococcus\_marin  
16331757\_Synechocystis\_sp.  
15606200\_Aquifex\_aeolic  
21674219\_Chlorobium\_tepidu  
34540013\_Porphyrromonas\_gingiv  
126662084\_Flavobacteria\_bacter  
110637073\_Cytophaga\_hutchi  
119885033\_Thermotoga\_petro  
116622276\_Solibacter\_usitat  
34580504\_Rickettsia\_sibiri  
15836008\_Chlamydomyxa\_pneumo  
24213088\_Leptospira\_interr  
66576257\_Chlorobium\_tepidu  
19704549\_Fusobacterium\_nuclea  
34541783\_Porphyrromonas\_gingiv

ESEEDFQETYEFLKRIPI SYMHIFPYS DRPFTKASKLPERIKKERVRLK  
ETDEDQFQSVKLIERC RFKNSFIFQYSVREGTKAAA VPREVKAARNNELL  
ETEDDFQOTMDLCAEIGFDKVHIAAFSARPGTRAAEVPPAVKERRRLE  
ETEDFQETLSLYDEVGYDAAYMFIYSARPGTPSYKLPREVKTERLQRLI  
ETDADFQOTLDDLDEVQYDSLFSFKYSRPN TSA-LIPEEEKQORRLTLQ  
ESDQDHNETISLMEYVGYENAFMFMYSLREKTHAHRVPTTLKNSRLTQV  
ETDQEFQDTLTLLEEVKYENAF LFAYSLREKTHAHRVPEEVKQORLQMI  
ESEDEHAETLTLLETVR YE HARTR-----RRPEEVKRRRLAEVI  
ETEAHAETISLMEQVRF DQAFMFAYSERERTIAARIPKEVKLRLRLEGEII  
ETEEEFEDTLAVVREVQFDMAFMFKYSEREGTMAQRVPEEVKSARLTKLV  
ETEAHRDTVSLIERIRYEHAF LFAYSMREKTHAHRVLEEVKIRRLNELV  
ETEDHVQTVSLLREVQYNMGFLFAYSMRQKTRAYHVPEEVKLRRLLEELI  
ETEKDHRETLSLMEAVGYDTAFMFHYSVRPGTWAARVPD TVK KARLQEI  
ETEEHQETLSLVRAGYDMA YMFAYSMREKTHAHRVPEEVKQORRLTELI  
ETEDDFEATLSLMEVRYDSAFMFKYSERPGTYAARVPEEVKLSRLDRMI  
ETEDHQDTLSLMEYVYDFGFMFAYSERPGT LAARVPEEVKRRLEIV  
ETEEHQDTLSLMEFARFDFGYQFVYSERPGT PAAKVPEDVKQORRLSEII  
ETEDFMETIDLVEKAQFERLNLAIYSRPGTVAVKVPYEEKVRRMQFLM  
ETEEEFEMTQLTEQVRYDNQFSFVYSRPRKTGAALVPHEVKIARLERLQ  
ETDEDQFQOTLDDLVRVYKQYCSFKYSRPRGTPGAT IPEHIKSERLTILO  
ETEKDFEQTMKLVVEVGFDFSF SFIYSARPGT PAA DLPEEVKRRQLQILO  
ETEEQFQRTLELMEALQLDNVNTAAYS RPRPTPAASVPEAVKMERLHRIN  
ETDAQFQNTLNLLEEVGF DQVNTAAYS RPNTPAATLPEAVKVERLQKLN  
ETEAQFENTLNLIEEVGF DDLNTAAYS RPRGTPA AFLSEEVKGRDLQRLN  
ETEDADFDTL DVVRQARFAGAF TFOYSRPGT PAA TIDRTTVAERYARLV  
ETEDFLDTIDVVQKVSFDNSYMFMY SIRQKTKAATIEBSVKKERLQRLM  
ETEDDFEHTL DVLKVRFEQVFSFKFSRPRGTPAAEIPDDVKTERMRLL  
ETEKDFEDTSLVKEIEFDSAF TFIYSKREGT PAAKVPEDVKHTRFNKLV  
ETEEEFQETLSLVEEVQYDAAFMFMYSERAGT PAAQLSVPEKKERLQRLM  
ETDEQFEETLSLYREVEFDSAYTFIYSRPGT PAAKVPMMVKKERLQRLN  
ETDEHDAQSLNLF RNLRFQV VNI TQYYARKNT PAA SVASKKRERTREMS  
ENDDSF EKT VQLIEKIRPEI INVTKFSPREL T--ADKPTNLIKQDRMIA  
ETHEDHQATVDTLRDLKLSVINISQYYSRKGTVSSGLDNNVKNRSREVT  
EGEAWE RETMELCDHVRFPV LNI TRFYPRRNT PAA SIPTDVAKRRTSELT  
ETDQDFQETV KLVVEYKFP S LFINQFYRPGT PAAKVPAQVKQRTKDL S  
ETNAQFDDTLKLV DKKYKFPILNISQFYRPGT PAAKVP SQDVKMRSKKIT  
ETDEQWRETMQLIEEYKFEVHISQFYRPGT PAAARVPTQIVKGRSRELT  
ETDEDFSQTVELIKDYKFPQVHISQFYRPGT PAAKQVSKIVKQRSRELT  
ETEEAFENTLELVKKIKP DFTHA AKYSQRKYTKAAI VDTKIKRERS EILN  
ESEEAQFQSLLEIKRIKPKDKVNSRYSRPGT IAAKLPGWVVKERSIMH  
EDDEAFQNTINLIKEIKFERIHLAMYSIRPNTRSASVPDSIKRERMIAH  
ETEDFQETV KLVLEELQFDKIHVARFSRPRPT EAAVVPDAEKRRSKILS  
\*

DSHLEILEEIHESRIGRTYDAIVDGVRRFQDAPEMPGRIGKVRIDSFYEY  
DLVEQLTATRAQERIGSRVQVLVEEGCAGHQQPDVAGDLIARVVATEGV  
QIQKRNVDKHNQKLI GEKIEAVIDNARFYGQAEVFGERC FBITGTAGY  
RLQQTISYTRNQRWVGRITKVLIEGGRSFRDAPEIAGTMPICVQVQTQATY  
SQQQEISFDNFAMSRVGVGDVVDLIDSGRTTLEAPDIPGQMRKNNIIGSLSF  
SLQQTIQEQIAESLIGTEIDILIDRGRTFMDAPDIPGSLVRRVSTSGW  
AHQQAISAARLQLKVGKIEEVLIDEGRSWADAPEIPGDKVVRITDADEY  
EVAQRI SREKLAEKVGRVLDV I IDEGRTKDAPGIIIGDIVQARSDEY  
LLQAEISNSRLDRFVGGKLLKFLVEGGRTWTEAPEVIGDFLEVVIKHEDEY  
AIQRKIARARNRGLVGVKVPVLSGARMSTQAPEIAGEIRRLRITEAHDY  
SIQQNVSSKINKNKLEKVKVLEVEGGRNYQMVPEIVGEFVYVKITDTLEY  
ELQQQIAFDWNSRVGGTEEVLDIAGTRSEAPDVVGGQIRPCEIVASQGY  
AIQKRINREONKLVGKRLEVLVEGGRHQGGQAPDIPGEIVTVEVTEAHDY  
EVQQEIARRRNQLQVGRELEVLVEGGRCYQSPGIPGDMVQVRITGVQDY  
ALQQPISAERNQRWVGRITDVLIEQGRCDRFAPEVPGTMVVFITGSDVY  
ALQQPISAQKNAA CLGQTL DVLIEQGRSTRFAPEVLNEIVPVVITATDDY  
AIQRGITRKKNEEFLGKIEEVLIDGGRAYFOAPEVSGDILKVKVTQVADY  
ELQEGISASLNKLEGGQTLKVLIDRARTYDAPEVEGDFRQVMIEDSTAY  
AVQERISAHNKAKIGSRLHVVIDRGRTEYDSPEVPGRFYMAEIVTGAEP  
DLQSQISWDLNQEIKIGTQFKCVIDRGRTEFDSPDVTDGDFVNLKIDATEF  
SIQEGISAELNEKKIGNTYKVLFDGRTEHDSPEVIGDFANVKINDAAEF  
EKAKDVSIRYKRRIIGKERKVLAEWGYDEYYVKEVGEFHNVRVKSLEE  
ELAAKNLFARESMIGRTL SAVTLA--TENYLKVEP GALVDLHIGGLASA  
QEQGNQLETFEKKHIGQKVELLVENAHNTENFIPVKIGQIFKAKLVAIBEN  
EVAKRVGQKEMMKRLGETTEVLVEKGHSPYFEKVSINTLVSVRLDRVEE  
SLSRELHQKIALSEIEKVREAILQ--TDNYLKVKGQFLNVLKLDQYEP  
GVIGERIERRFAEAFIGSTLKVLFEGYSEHYLRVSRGQVREVIDGFGEL  
SLKQEMIVDSRKKYLEKSLEVLVEEGYSQNYLRVKNVNLINVKVKCVEND  
LSDLRLAEFYRSQEGTHRRVLWEDGFTENYIRVAVGKVEEIVLGTKDP-

126663485\_Flavobacteria\_bacter  
 110638137\_Cytophaga\_hutchi  
 32477342\_Rhodopirellula\_baltic  
 16079597\_Bacillus\_subtil  
 118444753\_Clostridium\_novyi  
 15605955\_Aquifex\_aeolic  
 32475869\_Rhodopirellula\_baltic  
 76261232\_Chloroflexus\_aurant  
 94985469\_Deinococcus\_geothe  
 116625754\_Solibacter\_usitat  
 66807387\_Dictyostelium\_discoi  
 118402077\_Tetrahymena\_thermo  
 116061814\_Ostreococcus\_tauri  
 CM1685\_Cyanidioschyzon\_merolae  
 24213805\_Leptospira\_interr  
 Jakaba\_bahamensis  
 28872782\_Homo\_sapient  
 21674804\_Chlorobium\_tepidu  
 30690642\_Arabidopsis\_thalia  
 34540755\_Porphyrromonas\_gingiv  
 126663275\_Flavobacteria\_bacter  
 110638221\_Cytophaga\_hutchi  
 119885210\_Thermotoga\_petrop  
 108759982\_Myxococcus\_xanthu  
 34581161\_Rickettsia\_sibiri  
 94417083\_Pseudomonas\_aerugi  
 CM4402\_Cyanidioschyzon\_merolae  
 33862596\_Prochlorococcus\_marin  
 16329745\_Synechocystis\_sp.  
 111225071\_Frankia\_alni  
 19703810\_Fusobacterium\_nuclea  
 15605821\_Aquifex\_aeolic  
 118443818\_Clostridium\_novyi  
 51892897\_Symbiobacterium\_therm  
 16078764\_Bacillus\_subtil  
 71075619\_Giardia\_lambl  
 13542169\_Thermoplasma\_volcan  
 71029160\_Theileria\_parva  
 71661088\_Trypanosoma\_cruzi  
 93277076\_Homo\_sapient  
 118373032\_Tetrahymena\_thermo  
 116056662\_Ostreococcus\_tauri  
 18409989\_Arabidopsis\_thalia  
 121522286\_Methanococcus\_maripa  
 18978284\_Pyrococcus\_furios  
 15920732\_Sulfolobus\_tokoda  
 119871859\_Pyrobaculum\_island

GLSVKKRRAFYESQIGTKRTVLFENGFTENYVKVKNLTHEINLTKIDEG  
 TLSEKKRRFFYEQHITETADVLFEAGFTNNYKVVVNLKVKLKTINTG  
 EVEAELRQQYYKTLVGSNLELLVEEGTTCRYALGSENDLITARVVSQDD  
 ALSDQLAKEYASQYENEVLEIPEEGYTDNYMKVVIGKIVKILKAGYP  
 KLNEINEKKFIDKFIGEDMEVLYEQYTPNYIKVISGKIVNFKLIEFKDE  
 ELDQKKRQEFYKNGKELRALVIE-----TENYIDIKREGYKE-  
 AVQDRISKEDNQKLIQDTVEVLVEGGRTICDRIVVAGQLMDIQIDDVSSH  
 QLQEQIATERMARFLGQTVLVEVLEGGRTPGNRLVFTGQLVVPKITATSPW  
 AKQKEWSARKNAKVGTIQEVLRLGGHTRGNHPTVGPGIYRARIETHATPH  
 EKQRAIQIRNAEMIGSIQEVLEVGGRTTCNRTLNVGKYLPRVTRSGPN  
 DTFYKRLKEKNQLEIGNHHLVLDGGRTDTNKKVVLVEGYYIIVEIKGDSV  
 DVFHKNQELVNQEQVGRHHLVLEGGRTDTNKRVIINGDFVLARVDSVSVR  
 ETRFRCAADVNAREVGCETHLVLEGGRTDGRKRVSGDYVVAKIVEAGAS  
 STQLKISAERARAMVGTQVRLVEEARTESNRVWIGDYVEVSIITVSGN  
 DLQTSISHEQNRARIGRVYSILIEGRTPCGRMTVIGSTVQSIESATSA  
 TAFHAGALERNRAEIAREHLLVLEGGADESSIVVVVGEYVHVVRTDCTSA  
 TIFREEATKANQTSVGCQTLVLEGGRTDGNLKVIPGDYVVLVKITSASSQ  
 TVQRQLSLEHNQAQIGTIQKILIEGGRTNRNMAIKQYVDVLTGCSGG  
 NLQKRINRKLNERYKGTVRVIVEAGRDIRNKIIAIGRFADVIEKIEITAG  
 KLQRRISGEITAAALVGEVEMVEGGRTPENRTVNAGSFVTVKVERATPN  
 QELMAQQLAFNTSCVGSMTMKVLFDRGKTPYMQSVYLGKIIDVKITKASLN  
 GRIHQGYEISRRMVGSTQRILVTDGRTENNRIVNIQOFAQHIDDALPH  
 ELNMRIVDARSQRYLGRIEEVLVEGGRTTRTNKVVFRGRMANVRITQARAY  
 ALVERIALQRNSRYSQVQVLAEGGRTTRTNRLTFPGDLVDIQINSVRAF  
 ALQDEVSWAQNRELVGRRVELLVAEGRARDGRLVHPGDVVEVTVTRAAPH  
 EVQNKCSFYESSKYKGRIVKVLVEGGRTSTNKIVLKGQFINVKINECKTW  
 ELQKSILSEIAKYYEGTVQEVLEVEGGRTTTNKWASLGKIVKIKVKSPP  
 EAVNEIMARKNEFEFGKTVEVLVEGGRTSRGLVNVGKLVNIKIKANSF  
 EVQNRIRARAKNEARVGVYDILVEGGWTRGNILVTRGRIVPVRITRAGTW  
 ALVNEISAKMKKEYEGVVEVLVEGGYTEKSKLVNIGKIVRVKIQOAKTW  
 EVVK--NSFRRDQYHGQVHDIMVLEGGTYNNLTVLALGYSVVRVITGSTRV  
 DMHKEILQEKFSNLIGKTEFVLITEGRDHAYRPIVVFHFHVEITGFENT  
 NVFM--SYENNSKFLNEQFKAYFNHGYNKYYIKLILGTTQHVKVINTHKW  
 AFFN--SYRTLDMVMGEVHVSVALLEGHTKAYVQVLLGETVTVVIMSTTKY  
 RVFH--SYSPYDHWKIGERQVVLTEAHNQFYEQVLMGKMVEVDIYESGKH  
 ELFD--TFKRWHDLLGTTQRILWINDGHTKQYAKVMLGKSVI IKVTKLTW  
 VLFE--SYQPHQLVGVKTERVWVSDAHTKNYQIILMGRSAMVEIYESSRW  
 SVFE--AFAPYTGMECREERIWITEGHTKGYVQVLLGTSAMARITSVGRW  
 ELRLRELSYENNRHIGETFEILVTKGVTDNCKNVIIGEFRRVKVTKGAKTF  
 RVRLQISYETINQRYVGRKVDLIVHGAVTMNYKHI IKGEFARAKVNGSTST  
 EYVEEVAYSVHSEYLSNALVLTTEGRTINYIPVVLGEWINVKITEASFF  
 EVAMRIAHLRNGAQVGRDVLIDEGRASDYRQVVLGEFVNVRIAASPV

24213838\_Leptospira\_interr DMNGT  
 111225093\_Frankia\_alni DLVAE  
 15835786\_Chlamydomyxa\_pneumo DLVGR  
 76258351\_Chloroflexus\_aurant DLWGE  
 116060729\_Ostreococcus\_tauri DLEAQ  
 CM3493\_Cyanidioschyzon\_merolae DLLCV  
 94417985\_Pseudomonas\_aerugi DLWAE  
 94984483\_Deinococcus\_geothe DLYGE  
 119886282\_Thermotoga\_petrop DMWGS  
 116620691\_Solibacter\_usitat DVVGT  
 118443956\_Clostridium\_novyi DLIGV  
 32476670\_Rhodopirellula\_baltic DLVAA  
 108760706\_Myxococcus\_xanthu DLVAR  
 51892771\_Symbiobacterium\_therm DLLGE  
 33862448\_Prochlorococcus\_marin DLTGO  
 16331757\_Synechocystis\_sp. DLYGM  
 15606200\_Aquifex\_aeolic DLAGR  
 21674219\_Chlorobium\_tepidu ELFGR  
 34540013\_Porphyrromonas\_gingiv DLYAR  
 126662084\_Flavobacteria\_bacter DLYAE  
 110637073\_Cytophaga\_hutchi DLFGE  
 119885033\_Thermotoga\_petrop GVISC  
 116622276\_Solibacter\_usitat GLREQ  
 34580504\_Rickettsia\_sibiri YMKCM

|                                |        |
|--------------------------------|--------|
| 15836008_Chlamydomonada_pneumo | GLIGE  |
| 24213088_Leptospira_interr     | DKEGT  |
| 66576257_Chlorobium_tepidu     | QLHGR  |
| 19704549_Fusobacterium_nuclea  | ILIAE  |
| 34541783_Porphyrromonas_gingiv | --SGE  |
| 126663485_Flavobacteria_bacter | SVRLQ  |
| 110638137_Cytophaga_hutchi     | LVEIE  |
| 32477342_Rhodospirillum_baltic | RLELA  |
| 16079597_Bacillus_subtil       | YNEGO  |
| 118444753_Clostridium_novyi    | YAVGK  |
| 15605955_Aquifex_aeolic        | --VGK  |
| 32475869_Rhodospirillum_baltic | TLIGR  |
| 76261232_Chloroflexus_aurant   | SLQGV  |
| 94985469_Deinococcus_geothe    | MLYGR  |
| 116625754_Solibacter_usitat    | SLVGE  |
| 66807387_Dictyostelium_discoi  | TLK GK |
| 118402077_Tetrahymena_thermo   | SLFCT  |
| 116061814_Ostreococcus_tauri   | TLVAE  |
| CM1685_Cyanidioschyzon_merolae | RLIGE  |
| 24213805_Leptospira_interr     | TLKGR  |
| Jakaba_bahamensis              | TLRAE  |
| 28872782_Homo_sapient          | TLRGH  |
| 21674804_Chlorobium_tepidu     | TLSGE  |
| 30690642_Arabidopsis_thalia    | SLFGE  |
| 34540755_Porphyrromonas_gingiv | TLFGE  |
| 126663275_Flavobacteria_bacter | TLIGE  |
| 110638221_Cytophaga_hutchi     | TLFGE  |
| 119885210_Thermotoga_petrov    | PLYGK  |
| 108759982_Myxococcus_xanthu    | QLAGK  |
| 34581161_Rickettsia_sibiri     | SLTGE  |
| 94417083_Pseudomonas_aerugi    | SLRGT  |
| CM4402_Cyanidioschyzon_merolae | SLTGE  |
| 33862596_Prochlorococcus_marin | SLSGT  |
| 16329745_Synechocystis_sp.     | SLTGE  |
| 111225071_Frankia_alni         | HLTAD  |
| 19703810_Fusobacterium_nuclea  | TLYGE  |
| 15605821_Aquifex_aeolic        | SLEGE  |
| 118443818_Clostridium_novyi    | SLTGE  |
| 51892897_Symbiobacterium_therm | TLEGE  |
| 16078764_Bacillus_subtil       | SLDGE  |
| 71075619_Giardia_lambli        | ALIGS  |
| 13542169_Thermoplasma_volcan   | SLIGR  |
| 71029160_Theileria_parva       | HLECE  |
| 71661088_Trypanosoma_cruzi     | SVVGR  |
| 93277076_Homo_sapient          | FMKGQ  |
| 118373032_Tetrahymena_thermo   | HIEGE  |
| 116056662_Ostreococcus_tauri   | SCKAR  |
| 18409989_Arabidopsis_thalia    | SVFGE  |
| 121522286_Methanococcus_maripa | GLSGK  |
| 18978284_Pyrococcus_furios     | YLLGE  |
| 15920732_Sulfolobus_tokoda     | DLR GK |
| 119871859_Pyrobaculum_island   | YLYGE  |



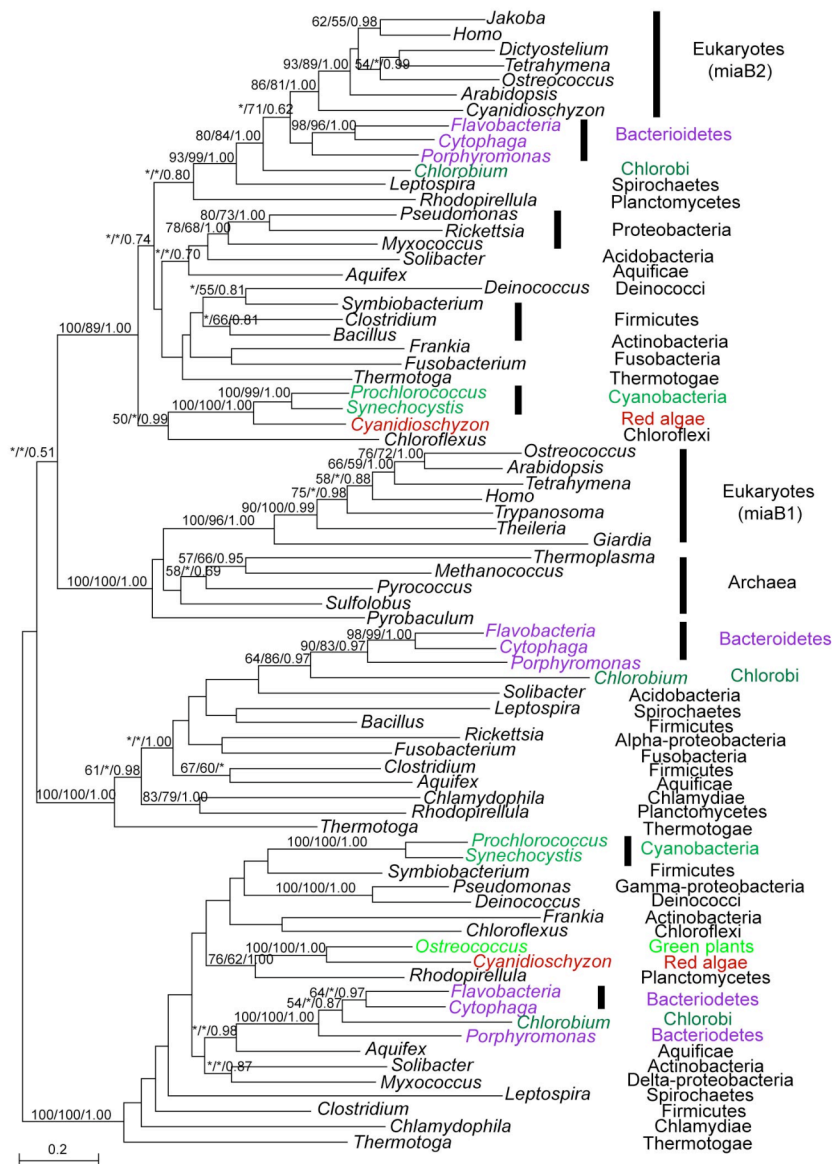

**Figure 9.** Molecular phylogeny of 2-methylthioadenine synthetase. P-value = 0.983 from AU test for the presented tree. See text for a more detailed discussion. AU tests were also performed on alternative topologies, including (A) *miB1* and *miA2* forming a monophyly, (B) *miA1* and *miA2* forming a monophyly that in turn groups with archaeal sequences, and (C) *miA2* forming a monophyly with proteobacterial sequences from the top part of the tree. These tests investigate if (a) *miA1* and *miA2* have the same origin, (b) *miA1* and *miA2* have a eukaryotic origin and are related to archaeal homologs, and (c) *miA2* has a mitochondrial origin. P-values < 0.001 from AU tests for these alternative topologies.

## 11. Uroporphyrinogen III synthase (D)

CLUSTAL X (1.83.1) multiple sequence alignment

15606833\_Aquifex\_aeolic VILTRELEDIKKDKPLFEREGFKVLELPLIQTKVLEFNLEEFDYIVFQSK  
10175667\_Bacillus\_halodu VLITRAKEQASSLSRLIEEAGVPIEVPLLSYEEVGASIQSYEWIVFTSA  
CM1920\_Cyanidioschyzon\_merolae IALTRERGNKSLATLVRREARIYELPCIADRIVQLLADSIDWILITSP  
145352552\_Ostreococcus\_lucima VVCTREERGKNGALMNLAAARGARCVLPLVEAATFPDVLESWDWVCVTSP  
20196944\_Arabidopsis\_thalia VVVTRERGNQI I KALEKNGISSLELPLIQFDRLASVLSKFDWIIITSP  
15807683\_Deinococcus\_radiod VAVTRTRQTGSELAALLSGRGAQVSEIPLLRPRTLVLGALNGFDWVLLTSE  
6458497\_Deinococcus\_radiod VAVTRPDGGGGRLGELLRAQGAEVLSVPLIRPRALWSGLRGVDWLLVTSP  
48895608\_Trichodesmium\_erythr ILVTRSAGQSSKFSSELLKQKQAKVIEMPALVWHDDLGINFDFWLLITST  
45510631\_Anabaena\_variab ILVTRSAGQSSQFSDRLTTLGATVIEMPALEWEELQAI SQFEWLLITST  
48845542\_Geobacter\_metall ILVTRAADQAGEFGAMLGALGARVLECP TIAWDLNDAADRPHWAVFTSV  
46579147\_Desulfovibrio\_vulgar VVVTRAREQASGLAALRELGADV IQFPTIDYAPVHEAIDTYDWWVFTSV  
12655814\_Selenomonas\_rumina ILVTRARSQASKLTAKLEKLGAEVLEAPAI SYAALDKAIADYHWLIFTSA  
108804799\_Rubrobacter\_xylanoph VVVTRARAQAGELSRLEELGA AVVEFPTIEFGPLDEAIDSFDFWVFTSV  
153813575\_Ruminococcus\_obeum VLVTRPKGRSSRTAEELRRRGA EVLELPSIRQSTLVHAFSSYQWIVFTSP  
2127342\_Clostridium\_josui ILVTRPKESSGTLVEKLRQLGAEPVEYPC IENKLYHACREYWGILLTSK  
: \*\* . \* : . : \*

15606833\_Aquifex\_aeolic KAVKIFLGKVNKKIVAVGKKTAELEKLGKADFIPENESAKGLIELFKR  
10175667\_Bacillus\_halodu NAVRFFNTWPPSIAAVGSSTQRELSRYGISVDLMPNEYVAESLVTMVK  
CM1920\_Cyanidioschyzon\_merolae TAAEVFAQVVRPPIASVGAATNTALLKYSLOANFIPSR AIGACLGDELVP  
145352552\_Ostreococcus\_lucima EAAKVFLAEYEVRAVAVGAGTGKVLAKAEMDKQFTPSKATAATMAALPC  
20196944\_Arabidopsis\_thalia EAGSVFLAEAWKQVIGVVGAGTARVFEAMLHVAFTPSKATGVAASELPE  
15807683\_Deinococcus\_radiod QAVRALARTLLARIAAVGSGTAWTLREYGLAPDFVPTRSGRHLGALPA  
6458497\_Deinococcus\_radiod QGGRLLGEALATRLAAVGEATARELRARGLPVDFLPTATALSLGRKLP  
48895608\_Trichodesmium\_erythr NGVDYFFERLAVKIAVVGKKTAE SLKTCGLVPDFIPNFVADSLVANFPE  
45510631\_Anabaena\_variab NGVDYFFERLNVKIAVVGKKTAE SLKTCGLVPDFIPNFVADSLVEHFFE  
48845542\_Geobacter\_metall NAVRFFFERLACRVCVAVGPKTAAALAPFGIRPDLIPADYKGEVVEVFRS  
46579147\_Desulfovibrio\_vulgar NGVKHFWNLARKVAAIGPATADALRDKGIAPDFIPEKYVAE GVVVEGMLA  
12655814\_Selenomonas\_rumina NGVGRFFARLFAKIAAIGLATAEKLKQYGLADVIPQ EYRAEGVLEALKG  
108804799\_Rubrobacter\_xylanoph NGVEAFLERLAARIAAIGPATAGRVREAGLRVDVVPREYRAEALLEEISG  
153813575\_Ruminococcus\_obeum TGVEIFFDELKAQIAAIGQGTAKVLEDRGILVDL IPEVYDGESELGALAV  
2127342\_Clostridium\_josui NGIQIFFDYLNTKIGTVGSQTAKALKEVGLISDFTPEIFDGRHLALGIAE  
. : : \* \* . \* . : :

15606833\_Aquifex\_aeolic KGKVLIPRSKIGRTELIKFLKETSFEV FALDVYTYTEVFFYTREELLEK-D  
10175667\_Bacillus\_halodu PCRVLFPKGNLARPTVKVGLTENGFVDEMTVYETKRP LEAKVMLCEAIE  
CM1920\_Cyanidioschyzon\_merolae KVRILYPTASASDEIEKRLRSRAVEFIRIDMYDTIEAKWTTEDIDTAVD  
145352552\_Ostreococcus\_lucima GSLILYPASKKAATTLQDGL EARGATVVRNLNTYSTERVERLSPEDVAAD  
20196944\_Arabidopsis\_thalia RSSVLYPASLKAGNDIVEGLSKRGFEVVRNLNTYTTVPVQSDTVLLQAP  
15807683\_Deinococcus\_radiod GEVALHVSQD TDAVLEMALSARGIEYVAAEAYRSELSELP AQREQLAQ  
6458497\_Deinococcus\_radiod GQAALHLTSQLSENTLRGELAARGVTYRRLELYHTAPAVLNAEAERVALVS  
48895608\_Trichodesmium\_erythr GKKILFPRVETGREVLVKELNSQGA EYVAAEYESSCPENILPEALLAID  
45510631\_Anabaena\_variab NKKILFPRVESGREILVKELSAKGA EYVAAEYQSCCPSSIPAAEL AID  
48845542\_Geobacter\_metall GKRIIFPKGDRARDVIPQGLAELGGEV TAPVAYRNVTDPDSLPA GVIAEIT  
46579147\_Desulfovibrio\_vulgar GKRVLLPRALEAREVLP EELRKAAGATVDVLPVYVTVPSAARRDVLARVH  
12655814\_Selenomonas\_rumina HAKILIPRAEEAREVLPDTLREMGA EYVAPAYRTICGQVDGEALAAEID  
108804799\_Rubrobacter\_xylanoph GRRVLIIPRAAREVLPERLREAGAEV SVPPAYETVPSAEGREELARGVD  
153813575\_Ruminococcus\_obeum GEKILLPRARRGNQKLVKILKEQGGQVSDIPT YDVTVEKSSLIHIDREID  
2127342\_Clostridium\_josui NEKVLICDAAIASDDIVNILRSNNIKFDRVPL YNTNYINENSNKVKKSLK  
: : \* \* .

15606833\_Aquifex\_aeolic FIIFYSPSAVKAFANLQSLKFVAIGKTTKEELQKHSVKNVITSERPSTE  
10175667\_Bacillus\_halodu IITFTSPSAVDHFVTLLDHLLYAYIGPIAAARAKQRGLPVHIVAKTYTGE  
CM1920\_Cyanidioschyzon\_merolae LVTLASPSAVKVAQRVGKQPAVCIGKTSADA AKEVGFSEVYAPSDPGL  
145352552\_Ostreococcus\_lucima VVTFGSPSAVRAWVELCGQPAYVCIGETS AEAACANCELPDVFPPELPGIE  
20196944\_Arabidopsis\_thalia VLSVASPSAVRAWLHLIQSNVYVACIGETTASAARRLGLKNVYYPEKPGLE  
15807683\_Deinococcus\_radiod VVTLASAVGARALAQVAGSFTA AVIGPQTELAAREAGFTRLILAEQPTLA  
6458497\_Deinococcus\_radiod AVTLASGSAAQGLAALAGRLPVAAIGEQ TAAAAWTLGFVSVTAPQPSLE  
48895608\_Trichodesmium\_erythr VITFASSKTVKNFCYLIGNICIASIGPQTSQSCHSLLRGVDV EAEQYTL  
45510631\_Anabaena\_variab IITFASSTVQFFHQLV DVGICIASIGPQTSKTCHTLLGRVDVEAEYTL  
48845542\_Geobacter\_metall CVTFTSSSTVENLAAILGGV TIAAIGPITARTCRELGLVHVHVEPSKYTLA  
46579147\_Desulfovibrio\_vulgar CVTFTSSSTVENFSLVPEVKLACIGPVTKK TLEGFFTCHI QPDYDITIP  
12655814\_Selenomonas\_rumina LVTFSTSSSTVKNLVNII GGVKTACIGPV TADTAKSLGIEPDI IAKETYD  
108804799\_Rubrobacter\_xylanoph CVTFTASSTVENFVAAFGGTRVACIGPITAAAAREGLRVDVEAEY TIE  
153813575\_Ruminococcus\_obeum CVVFTSASTVKGFVESTGKVTAACIGKQT KAAADYGMQ-TYMSEKATID  
2127342\_Clostridium\_josui YITFTSASTVEGFIASMKSLTAVCIGNKTA EAAKYNLR-YVVAEKSTID  
: . : . \* \* : .

15606833\_Aquifex\_aeolic DIVKKLKE

|                                |          |
|--------------------------------|----------|
| 10175667_Bacillus_halodu       | GLVNAICD |
| CM1920_Cyanidioschyzon_merolae | AWVDTLVR |
| 145352552_Ostreococcus_lucima  | GWAETVFL |
| 20196944_Arabidopsis_thalia    | GWVESIME |
| 15807683_Deinococcus_radiod    | SLSDAVQR |
| 6458497_Deinococcus_radiod     | GLVAAAIK |
| 48895608_Trichodesmium_erythr  | GLTKAIIE |
| 45510631_Anabaena_variab       | GLTQSIIN |
| 48845542_Geobacter_metall      | AMTDALVD |
| 46579147_Desulfovibrio_vulgar  | ALVDELTR |
| 12655814_Selenomonas_rumina    | GLVEAICK |
| 108804799_Rubrobacter_xylanoph | GLVRAVAG |
| 153813575_Ruminococcus_obeum   | SLVELVVK |
| 2127342_Clostridium_josui      | SMIDKLLI |

**Note:** This sequence has identifiable homologs only in green plants and bacteria (using *Cyanidioschyzon* and *Arabidopsis* GI 20196944 as queries). The top hits in GenBank searches are from firmicute and *Deinococcus* homologs. The *Arabidopsis* sequence (GenBank accession number NP\_565625 and TAIR locus AT2G26540) is annotated as a chloroplast precursor, but appears not likely to be plastid-derived. Cyanobacterial sequences have a 1-aa insertion not shared by any other sequences.

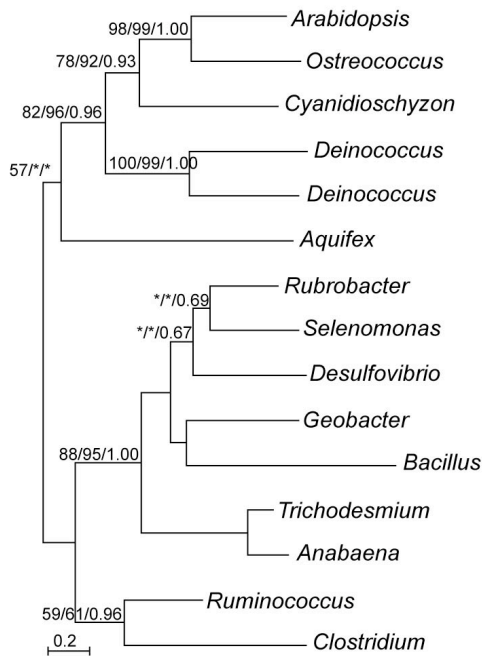

**Figure 11.** Molecular phylogeny of Uroporphyrinogen-III synthase. P-value = 0.959 from the AU test on the presented tree. AU tests were also performed on alternative topologies including (**A**) monophyly of red algal, green plant and cyanobacterial sequences, and (**B**) red algal, green plant and *Deinococcus* sequences forming a monophyly that in turn groups with cyanobacterial homologs. These tests investigate if a) red algae and green plants acquired this genes from plastids, and b) red algae and green plants acquired the genes from plastids and subsequently spread to *Deinococcus* by secondary HGT. P-value < 0.001 from AU test for topology **A** and p-value = 0.04 for topology **B**.

## 12. ACT-domain containing protein (N)

CLUSTAL X (1.83.1) multiple sequence alignment

```

113648684_Oryza_sativa          VLIDQSDSRDATIVQLSFGDRLGALLDITMKALKDLGLDVTKGSV-STESA
9758449_Arabidopsis_thalia      VMIDQADDEPEATIVQLSFGNRLGALIDTMRALKDLGLDVIKGTV-STEGS
CM2077_Cyanidioschyzon_merolae -----ATRLVVTCRDRKGLLSDLTDALKSIGLQIRRAVA-RTKDG
88857979_Pseudoalteromonas_tun  IMVSEEPHGGTQVFVYSQDEINLFARLVNALGSKKAHIHYAQMSTKDG
46133622_Haemophilus_influe     VKISNRFSLGGTEVFVYICQDQPHLFNKVVSTIGTKKFSIHDAQIITSDG
46143705_Actinobacillus_pleuro  VLVSNEYARGATEIFIYCEDQQLFLRIAQILSOKKVSIHDAQIITSDG
71546701_Syntrophobacter_fumar  WEVSSGDTA--EITIVSWEKPGLLSRCAGLLTLHSMNILGAQVFTMHNG
46449059_Desulfovibrio_vulgar   VVMEGRPVHGLWEVTILARDQQGLFATLAGVVALHGLNVYAADAFVWRDG
67985038_Kineococcus_radiot     -----VVTVVTPDRGTGVFADLAGLAGHRF-LVRSALVRLDGD
58002716_Protein-PII]_uridyl    VEAYPIPERGVTELTVLCADHPGLFSQIAGALAVSGASIVDARIHTLSDG
103488264_Sphingopyxis_alaske   IAAPVDDDRGATLVMVLAADHPGLFYRIAGGIHLAGNIIDARIHTTRDG
23012593_Magnetospirillum_magn  TTYETDPVRGVELTVYSPDHPRLLAITGACATTGGNIVDAQIYTTTDDG
78697304_Bradyrhizobium_sp.     INVGFDPARGVTELTIFAMDHPWLLSI IAGACASAGANIVDAQIYTTTDDG
86747159_Rhodopseudomonas_palu  VNVGFDEARGVTELTILAVDHPWLLSI IAGACASAGANIVDAQIYTTTDDG
                                     : : : : : : : : : : : :

```

```

113648684_Oryza_sativa          VTQTKFHIMLEKIRLTVINLLQYHVVTTHVIVEDDGPKRSMLEYIETADRP
9758449_Arabidopsis_thalia      IKQTKFSITLQIRLTIINLLKYHIATHIHVKEDGPKRSLLVYIETADRP
CM2077_Cyanidioschyzon_merolae  IASDEFFVTLDAVEQALQPMGTSGRGVHVYVDNHASQHTTITVNAAPDRP
88857979_Pseudoalteromonas_tun  YAIDNFVVLINSIRRSIEQAIKESGIKQVIVRPHGRKDTLIEIQAVDIP
46133622_Haemophilus_influe     YVDFDSFIITRRELEQALTVLQSEKVTQDVRFLHENKKEEMELVALDKP
46143705_Actinobacillus_pleuro  LVLDSFIVTCEQIKQSLEKVLNTSERQTKVRFADSQQNTAFELFTLDRE
71546701_Syntrophobacter_fumar  LILLIFQCRWNAVRLDVERLLGKMAPSQVLDVNDQSSAMTILEVYTVDRV
46449059_Desulfovibrio_vulgar   TALDVHFVTWGVVRSVQYAMTGKLRPAEVRVDNGLSDFTVIDVFADRP
67985038_Kineococcus_radiot     VAVDSWVWEAVLLRQGLERIVGGDVAHPRVILPGASERTVLEVRADRP
58002716_Protein-PII]_uridyl    MALDFTFVQLGRLNHLVEQALSGRLVPPRVVLDNTASDRTVLEVNGDRP
103488264_Sphingopyxis_alaske   LALDNFLVQIARLTRAIEDALANRQVAPNVFVDNKASNRVTIEVNAQDRP
23012593_Magnetospirillum_magn  FALDSIFISAGRIATAIERALKGEIVPPDVSIDNALSRTVVEITGLDRP
78697304_Bradyrhizobium_sp.     RALDTIAISATRIGETIEQVLEGLVEPEVSIINNQWSELTVIEVSGLDRP
86747159_Rhodopseudomonas_palu  RALDTISISATRIGEMIEEVLEGLVEPEVSIINNWSDRTVIEVSGLDRP
                                     : : : : : : : : : : : *

```

```

113648684_Oryza_sativa          GLLLEIVKIIITDNNVDVESAEIDTEGLVAKDKFHVS-YRGAKNSSLSVL
9758449_Arabidopsis_thalia      GLVVMEMKVMADVNIDVESAEIDTEGLVAKDKFHVS-YQQALNRSLSVL
CM2077_Cyanidioschyzon_merolae  NLLNEIIDLHLELNIITFACLSTYADENKDI FHVTTMSGEQVDAVLEI
88857979_Pseudoalteromonas_tun  GLLTKIAEVFHSMALNIHAARIITVGERAEDFFVVSNNFLALNDNQSI
46133622_Haemophilus_influe     GLLAQVSOQIFTELNLNLNAKIITVGEKAEDFFILTNQFGALDSQQRIL
46143705_Actinobacillus_pleuro  GLLARVSSVFNLGGLNLINAKIITIGERVEDFFVVTQHQHALDDKAQAL
71546701_Syntrophobacter_fumar  GLLYTIQRTLFLQIRISVAKITTKIDQVADVFYVTRHQGEKVSDEPEQL
46449059_Desulfovibrio_vulgar   ALLYDVARTLQSLHLDVLFKAVSTLGNRTADTFVSRVTAQQGKLTDEHEV
67985038_Kineococcus_radiot     GLLHALGRALAEEGIDIRSAHVATYAAQAVDVLVLAESGERLSP-RVA
58002716_Protein-PII]_uridyl    GLLHDVTSALSASLQISSAHITTYGMRAVDVFYVRDLGKMITDPVRR
103488264_Sphingopyxis_alaske   ALLNQLAYALFQSKVTVHSAHVATYGERAVDTFYVTDLIGDKIDSPARTL
23012593_Magnetospirillum_magn  GLLYELTTALNRLSLNITSAHVATFGERAVDVFYVTDLTGTGRVMQPDRI
78697304_Bradyrhizobium_sp.     GLLYELTTAISKLNLNIAAHVATFGERARDVFYVTDLLGAQINAPTRAI
86747159_Rhodopseudomonas_palu  GLLYQLTTAISKLNLNIAAHVATFGERARDVFYVTDLLGAQITAPTRAI
                                     *: : : : : * : * : : :

```

```

113648684_Oryza_sativa          VNCLRYYL
9758449_Arabidopsis_thalia      VNCLRYFL
CM2077_Cyanidioschyzon_merolae  MNTLYFLL
88857979_Pseudoalteromonas_tun  QNALIKRL
46133622_Haemophilus_influe     RNVLYRNI
46143705_Actinobacillus_pleuro  KSALLDEL
71546701_Syntrophobacter_fumar  KRALLFWL
46449059_Desulfovibrio_vulgar   RAALLHAV
67985038_Kineococcus_radiot     IRVLSDA
58002716_Protein-PII]_uridyl    RETLLASL
103488264_Sphingopyxis_alaske   EKRLLEAA
23012593_Magnetospirillum_magn  RAAVMEVF
78697304_Bradyrhizobium_sp.     KSALLHLL
86747159_Rhodopseudomonas_palu  KRALLVHLL
                                     :

```

**Note:** Identifiable homologs of this gene (using *Cyanidioschyzon* sequence and *Arabidopsis* GI 9758449 as queries) are restricted to red algae, green plants, proteobacteria and firmicutes with low sequence similarities (Evalue e-4 and lower). The annotation of the

*Arabidopsis* sequence (TAIR locus AT5G04740) indicates that the protein is located on the chloroplast thylakoid membrane.

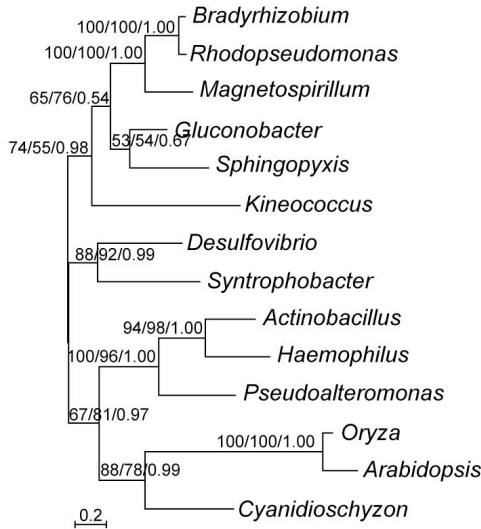

**Figure 12.** Molecular phylogeny of ACT-domain containing protein. Since no other eukaryotic or cyanobacterial homologs were identified, no statistical test on alternative topologies was given.

### 13. Queuine tRNA-ribosyltransferase (D)

CLUSTAL X (1.83.1) multiple sequence alignment

```

42520578_Wolbachia_endosy          SGSARVGTIKTPNGSVETPAFIFCATKAAIKAADIERISGTQIILSNTYH
58613533_Heterocapsa_trique          -----
45656892_Leptospira_interr          LTKARTGILNLNGIELKTPVFMVPGTRGVVKTLSADDLEEYSLILGNTYH
19068923_Encephalitozoon_cunic      TTNARVSTLELNGTSLELPIFMPVGTYGAMKGIKIRVSDLE--SMILTNTYH
3881825_Caenorhabditis_elegan       AGFARRGNLHLPHSIVETPVFMVPGTQGTMTKIVPEQLVDCRILLCNTYH
56473322_Entamoeba_histol           DGRARQCTLTLPHGEVETPVFMVPGTKASVKSLTYEQVKGCCQILLANTYH
46229743_Cryptosporidium_parvu      CGRARYGVNLNPHGRVDTPIFMPVATHGSIKGLSSLQVENVPILLGNAYH
TP000008041_Trimastix_pyriform      -----
12597314_Homo_sapien                RSRARAGELWLPHGTVATPVFMVPGTQATMKGITTEQLDGCRCICLGNTYH
60463331_Dictyostelium_discoi       W GKARA AKLTLPHHCSTPMFMPVGTQGTVKGLTSQQLVNCGVVVGNTYH
62360604_Trypanosoma_brucei         -----MPVATQATLKGVTVEQLEDVEIILGNTYH
50900348_Oryza_sativa                FNRARAARLTLPHFTCQTPLFMPVGTQGTIKGLTTDQLEGCCQIILGNTYH
JBO00061016_Jakoba_bahamensis       -----
28850382_Dictyostelium_discoi       KSNARVTKITTPHGIIMQPNFVPGTVGTIKFLDPISTKKSQLMFVNTYH
116059209_Ostreococcus_tauri        RSRARVGEIRTPHGTVRTPGFVSVGTNAALKAVHHEITLDGLDLMFANTYH
CM2163_Cyanidioschyzon_merolae     RSSARIGRLHTPHGTVEPFAFVAVGTNAALKMVDQRRADGLELLFCNTYH
46446428_Parachlamydia_sp.          KSRARVGRIHTPHGIIDTPNFVAVGTNGTVKALNNTMLHGLQLMFCNTYH
76788915_Chlamydia_trachomat        KSRARVGRIEHTAHGYIDTPAFVAVATNGALKGVLDH---NIPLMFCNTYH
29840339_Chlamydomophila_caviae     KSRARVKGKIETAHGIIDTPAFVAVATNGALKGVLDH---NIPLMFCNTYH
11499080_Archaeoglobus_fulgid       LDRMRVGVKTRHGSFETPVFIPVATLAAIRGLDNRLDKGVEVILANTYH
21674218_Chlorobium_tepidu          HSAARCGVLSHGDIPVTPFMPVGTASVKSVEPNELKDAKIIILANTYH
48855206_Cytophaga_hutchi          GTSARAGVITTDHGTFFETPIFMPVGTAGTVKAMHQRELEDAPIIILGNTYH
53713592_Bacteroides_fragil        KSNARAGLITTDHGQIQTPFMPVGTIGSVKGVHQTELKQAQIILGNTYH
76258051_Chloroflexus_auranti       ESRARAGLLQTAHGTVATPVFMVPGTRATVKSLLTPHELKRGASIIILGNTYH
15644309_Thermotoga_mariti          FGKARLGVMKLLHGGAVETPVFMVPGTNASVKLLTPRDLLEGAEIILSNTFH
6460406_Deinococcus_radiod         DGRARTATFQTPRGAVTTPMFMVPGTQGTVKGISPQELLSQMILANTYH
48891338_Trichodesmium_erythr      YTKARAGIFITPHGSIINTPRFMPVGTLANVKLLTPAQLEGAQMILANTYH
56751072_Synechococcus_elonga       QTRGRACSFHTPHGIVETPRFMPVGTLATVKTVTTPAQLRGAQMVLNNTYH

```

20455294\_Nostoc\_sp  
46106898\_Rubrobacter\_xylano  
42523694\_Bdellovibrio\_bacter  
15611336\_Helicobacter\_pylori  
15606515\_Aquifex\_aeolic  
32397050\_Rhodopirellula\_baltic  
39996277\_Geobacter\_sulfur  
23473888\_Desulfovibrio\_desulf  
39997713\_Geobacter\_sulfur  
52006768\_Thiobacillus\_denitr  
53732897\_Haemophilus\_influe  
48730213\_Pseudomonas\_fluore  
19715156\_Fusobacterium\_nuclea  
56963323\_Bacillus\_clausi  
16800633\_Listeria\_innocu  
39935672\_Rhodopseudomonas\_palu  
52011430\_Silicibacter\_sp.  
15604558\_Rickettsia\_prowaz

QTKARSGIFLTPHGIVETPRFMPVGTLANVKTVTPAQLKGAQMVLSNTYH  
CGAARAGLLRTPHGAIVETPTFMPVGTGKAVKGLSPRDLGAGIVLGNITYH  
DGHARRATLMTAHGPVQTPVFMVAVGKATVKAMTPEELKGTQVVLGNITYH  
DDNARAGVNLNLAHSQVETPVFMPVGTQGCISLSDAMDAQAKLILANTYH  
DGKARRGRIYTPHGVIEPTVFMVAVGKATVKAMTPEELKGTQVVLGNITYH  
DGGARRGVFHTPRGPVRTPGFMPVGTGTLVTKGLTIDQVAGADMILGNITYH  
KTSARRGSLTTPHGTIETPIFMPVGTGTHAAMKAMTPSQVKGAQIILSNTYH  
DGKARTGVLQTAHGPVRTPIFMPVGTGTVSVKGVAPDDLDGAEIILGNITYH  
DGAARLGLSTTPHGLIETPIFMPVGTQATVKAMTPEELDGARIILANTYH  
DGGARRQLHLAHGVVQTPVFMVAVGKATVKAMTPEELDGARIILANTYH  
SGSARRGRLVFPQGTVETPAFMPVGTGTVKGMTPEEVRGAEIILGNITFH  
DGKARRGRLTFPRGTVETPAFMPVGTGTVKGLMPLRDIIVGAEIILGNITFH  
DGKARAGVITTLHGEIETPVFMVAVGKATVKAMTPEELDGARIILGNITYH  
QSGARLGRVHTPHGTIETPMFMPVGTLATVKTMSPELDKDAQIILSNTYH  
QTGARLKGKIHPTPHGTFTDPMFMPVGTLATVKTMSPELDKDAQIILSNTYH  
DGAARTGRLTTPHGVVETPAFMPVGTAGAMKGLHWREVRGADIVLGNITYH  
DGKARTGVIHTPRGEIRTPAFMPVGTAAATVKAMPESVRGADILLGNITYH  
YKARSQVITTAHGEIRTPAFMPVGTGAVKAMLTAEVVGDILLGNITYH

42520578\_Wolbachia\_endosy  
58613533\_Heterocapsa\_trique  
45656892\_Leptospira\_interr  
19068923\_Encephalitozoon\_cunic  
3881825\_Caenorhabditis\_elegan  
56473322\_Entamoeba\_histol  
46229743\_Cryptosporidium\_parvu  
TP000008041\_Trimastix\_pyriform  
12597314\_Homo\_sapient  
60463331\_Dictyostelium\_discoi  
62360604\_Trypanosoma\_brucei  
50900348\_Oryza\_sativa  
JB000061016\_Jakoba\_bahamensis  
28850382\_Dictyostelium\_discoi  
116059209\_Ostreococcus\_tauri  
CM2163\_Cyanidioschyzon\_merolae  
46446428\_Parachlamydia\_sp.  
76788915\_Chlamydia\_trachomat  
29840339\_Chlamydomonas\_caviae  
11499080\_Archaeoglobus\_fulgid  
21674218\_Chlorobium\_tepidu  
48855206\_Cytophaga\_hutchi  
53713592\_Bacteroides\_fragil  
76258051\_Chloroflexus\_auranti  
15644309\_Thermotoga\_mariti  
6460406\_Deinococcus\_radiod  
48891338\_Trichodesmium\_erythr  
56751072\_Synechococcus\_elonga  
20455294\_Nostoc\_sp  
46106898\_Rubrobacter\_xylano  
42523694\_Bdellovibrio\_bacter  
15611336\_Helicobacter\_pylori  
15606515\_Aquifex\_aeolic  
32397050\_Rhodopirellula\_baltic  
39996277\_Geobacter\_sulfur  
23473888\_Desulfovibrio\_desulf  
39997713\_Geobacter\_sulfur  
52006768\_Thiobacillus\_denitr  
53732897\_Haemophilus\_influe  
48730213\_Pseudomonas\_fluore  
19715156\_Fusobacterium\_nuclea  
56963323\_Bacillus\_clausi  
16800633\_Listeria\_innocu  
39935672\_Rhodopseudomonas\_palu  
52011430\_Silicibacter\_sp.  
15604558\_Rickettsia\_prowaz

LMLQPGENTVGLRKMIGWNGPMLTDSGGYQIFSIINEDGAIFRSYINGKIY  
-----  
LYLRPGTSVGLGKFKSTWKKALLTDSGGYQVFSYEQDGVRFQSHIDGSRH  
L-----NIKEFMKYNRGMILTDSGGYQIGSVTEEDGVRF-----DS  
LGHRPGHERVGLHKKMNWNRSLTDSGGYQVFSVDENGVNFSPTGEMM  
MFLHPGVVDVGLHGFQAKWDGNIILTDSGGYQVFSVNEQGVIFQSVIHKPI  
LGSRPGEIIGLHNFMRWRNRIILTDSGGYQVFSITEEGVEFRHPYTNANL  
-----  
LGLRPGPELIGLHGFMMNPHNLLTDSGGYQVFSVTEEGVRFSPYDGNET  
LGHRPGPEVMDLHKKFMNYPRMLTDSGGYQVFSITEEGVQVQSPHDGSTM  
LGLRPGEDILGIHFLQGWKRNIILTDSGGYQVFSITEEGVRFQSTHGGGSL  
LELRPGSQLIGLHKKFMNWKRALILTDSGGYQVFSITEEGVTFQSPVDGKPM  
-----EGVRFQSPHDGSEM  
MNVNSDPKILGLHKKFINYQNPITDSGGYQVFSIKDSGVKFLSYKNGDIT  
LMLQPGAETVGVHEMMGRRRPTITDSGGYQVFSVSEEGAMFRSYRDGTM  
LLLQPGPEIVGLHRFMQRSRPIMTDSGGYQVFSVSENGPVFRSYRDGRKI  
MMLQPGTDIVGLHSFIQRKLPITDSGGYQVFSITEEGVFRSYRDGSKV  
LIVHPGAEIIGLHGFQIQRNAPIITDSGGYQVFSVNDGVDHFKSYRDGRKL  
LLVHPGTEIIGLHKKFMNWRNAPIITDSGGYQVFSVNDGVDHFKSYRDGSKV  
LHLRPGDELIGLHKKFMNFDGVIITDSGGYQVFSVTDGVRVFKPKSGRIV  
LYLKPNDILGVHRFMNWDGPLLITDSGGYQVFSISIEEGVFMFKSHLDGSKL  
LYLRPLNIIGLHKKFIGWKRNIILTDSGGYQVFSINEEGVFKSHIDGSAH  
LYLRPGLDVLGLHKKFMNFDGVIITDSGGYQVFSVNDGVDHFKSYRDGSKV  
LYLQPGHELIGLHSMGWNGPILITDSGGYQVFSVTEEAVIFKSYLDGSRH  
LMLKPGVEIIGLHNFMGWKRPIILTDSGGYQVFSIDDEGVFRSYRDGSKV  
LMLRPGELVGLPGFTAYPGPFLTDSGGYQVFSISIEEGVFMFKSHLDGSKV  
LHLQPGESIVGLHKKFMNWRNPIILTDSGGYQVFSISIEAGVFKSPHDGSMI  
LHLQPGEEIVGLHRFMNWSGPMILTDSGGYQVFSIEERGVTFRSPRDGAVI  
LHLRPGBAIVGLHKKFMGWNGPMLTDSGGYQVFSITEEGVTFRSPRDGQII  
LYLRPGAEEVGLHEFTGWGPMILTDSGGYQVFSVSEEGVFRFTSVYDGSVH  
LHLRPGKTIIGLHKKFMNWHGPIILTDSGGYQVFSVTEEGVEFRSHLDGSAH  
LYLRPGKEVIVGLHRFAQFQGSFLTDSGGYQVFSVTEEGVFRSHLDGSAH  
LYLRPGETIIGLHRFISWNKPIILTDSGGYQVFSVSEEGVFRSHLDGSAH  
LRLRPGHETVGLHKKMGWDGPIILTDSGGYQVFSVNEHAATFRSHIDGAKI  
LHLRPGEDLIGLHRFMGWNGPILITDSGGYQVFSITDEGVFRHEVSGEEV  
LYLRPGEDELVGLHGFNAWRKPIILTDSGGYQVFSISIEEGVFRSHLDGSKV  
LYIRPGHELIGLHRFMHWRPILITDSGGYQVFSISIEEGVRFQSHLDGSKV  
LWLRPGLVIGLHRFMGWNGPILITDSGGYQVFSITEEGVFKFASPTNGDKL  
LWLRPGEIVIMDLHDFMQWHRPILITDSGGYQVFSITEEGVFKFQNPINGERI  
LWLRPGETEVIDLHDFMQWKGPIILTDSGGYQVFSIKEEGVTFASPDGSKV  
LYLRPNDELIGLHKKFMNWRPILITDSGGYQVFSIKEEGVYFSSHIDGSKV  
LWLRPGEIIGLHGFMMNWDKPIILTDSGGYQVFSITEEGVFRNHLGSEKL  
LWLRPGEELIGLHKKFMNWDQPIILTDSGGYQVFSIKEEGVFRNHLGSEKL  
LMLRPGAERIGLQRFTTWNGPMLTDSGGYQVFSVNEQAVTFRSHIDGAAI  
LMLRPTAERIGLHKKFMNWRPILITDSGGYQVMSLTKGVTFKSHIDGSRH  
LMLQPSAERIGLHKKFMNWDKPIILTDSGGYQVFSITEEGVFRSHINGNKY

42520578\_Wolbachia\_endosy  
58613533\_Heterocapsa\_trique  
45656892\_Leptospira\_interr  
19068923\_Encephalitozoon\_cunic  
3881825\_Caenorhabditis\_elegan

CLTPEKSVQIQKLGADLILVLDCEPFFHVSKEYTAKSMLMSHRWAERSL  
--SPESIVIQRELGADLILVLDCEPFFHVDKAYTARAMRRSHRWAERSL  
YFTPNVSDIQRSIGSDIMMVLDCCAFDSDGPERLKQSLDRTHRWAERSV  
LFTPEDSMNIQMLGADIIMQLDDVVNPCDTRKIEIAMRRSIRWMDRCI  
ALPPEKSEIEIQALGADIMMQLDHVIVLTTGDIVKEAMHRSIRWLDRCI

56473322\_Entamoeba\_histol  
46229743\_Cryptosporidium\_parvu  
TP000008041\_Trimastix\_pyriform  
12597314\_Homo\_sapient  
60463331\_Dictyostelium\_discoi  
62360604\_Trypanosoma\_brucei  
50900348\_Oryza\_sativa  
JB000061016\_Jakoba\_bahamensis  
28850382\_Dictyostelium\_discoi  
116059209\_Ostreococcus\_tauri  
CM2163\_Cyanidioschyzon\_merolae  
46446428\_Parachlamydia\_sp.  
76788915\_Chlamydia\_trachomat  
29840339\_Chlamydomonas\_caviae  
11499080\_Archaeoglobus\_fulgid  
21674218\_Chlorobium\_tepidu  
48855206\_Cytophaga\_hutchi  
53713592\_Bacteroides\_fragil  
76258051\_Chloroflexus\_auranti  
15644309\_Thermotoga\_mariti  
6460406\_Deinococcus\_radiod  
48891338\_Trichodesmium\_erythr  
56751072\_Synechococcus\_elonga  
20455294\_Nostoc\_sp  
46106898\_Rubrobacter\_xylano  
42523694\_Bdellovibrio\_bacter  
15611336\_Helicobacter\_pylori  
15606515\_Aquifex\_aeolic  
32397050\_Rhodospirillum\_baltic  
39996277\_Geobacter\_sulfur  
23473888\_Desulfovibrio\_desulf  
39997713\_Geobacter\_sulfur  
52006768\_Thiobacillus\_denitr  
53732897\_Haemophilus\_influe  
48730213\_Pseudomonas\_fluore  
19715156\_Fusobacterium\_nuclea  
56963323\_Bacillus\_clausi  
16800633\_Listeria\_innocu  
39935672\_Rhodopseudomonas\_palu  
52011430\_Silicibacter\_sp.  
15604558\_Rickettsia\_prowaz

NLPPEESIHQQAIGSDIMMQLDDVVSSLTTPGRVVEAMERSVRWLARCK  
LFTPEKSIQVQNAIGADIIMQLDDVITAKSTDPQRFDEAVDRTRWLDRCI  
-----PRVEAMHRTIRWLDRCY  
LLSPEKSVQIQNALGSDIIMQLDDVVSSVTGPRVVEAMYSIRWLDRCI  
VLTPELSMGIQNSIGADIMMALDDVVSSTTVGPRVVEAMYRTRWLDRCI  
LLKPEDSIRIQNALIGGDIMMQLDDVVHVLTTGPRVVEAMRRTIRWLDRSL  
LLTPEESIHQNNIGADIIMMALDDVVKTITGPRVVEAMRTRWLDRCI  
LLRPEDSMAIQNRLGADIMMALDDVVSSTTGPRVVEATQRTLRWLDRCI  
ELGPVSSIKYQKQLGADIIIPFDELPPYHMDKELLRSLHRTHHWATSL  
TLTPESSVAAQKAIGADIIIPDELPPYDIDNLRRESVARSHRWMTSL  
ELTPEKSVQAQKMLGADIIIPDELPPYHIDRDALYQSVLLSHRWEARSL  
LLTPESSIKAQKDLGADIIIPFDELPPYHIARDALKKSLDRTHRWEKRSL  
FLSPEISVQAQKDLGADIIIPDELLELPHFADPTFYHQSSQRTYVWEKRSL  
FLSPEISVQAQKDLGADIIIPDELLELPHFSDKEYFLSSCSRYYVWEKRSL  
ELTPKKSMEIQSNLGSIIIPAFDECTSPLSDRDYTEKALERTHRWAECL  
HFTPENVVDTQRIGSDIMMPLDECPPWPAEKEYVQKSGELTLRWAERAR  
FFTPEVMDIQRITIGADIVMAFDECTPPYCEYAYARKSMEMTHRWLRGCV  
IFTPEKVMQIERIIGADIMMAFDECTPPGDSYAYAKKSLGLTRHWLRDRCI  
VFTPERSIEVQHHLGADIIIPFDELPPFRAGYDYTAQSMARTRHWAERCL  
FLNPEISMEVQIALGSDICMVFDECHCPVDADYEEVKEATERYRWALRSK  
ELTPERSIQVQALGADVIMAFDECTPPYPAERPPIEASLDRTVRWLDRCH  
DLTPERSIQINELGGDVIMAFDECTPPYPAERPEVEELATNRTYRWLQRCI  
EFTPERSIRIQNALGADVIMAFDECTPPYPAERKDVAAVARTYRWLRCI  
KLTPEERSIEIQNLGADVIMAFDECTPPYPAERKDVAAVARTYRWLRCI  
AFTPELAVRVQALGADVAMVLDCEPPAEADRAYHVSSLRRTARWAARCK  
FISPEKSMEQDLGSDIIMAFDECTKYPATDEEIEKSMALTRWLLRSQ  
LFTPIKVLDIQYSLNSDIMMVLDDLVGLPAPLKRLEESIKRSKAWANMSL  
FFTPEKVVIEIQEIFGSDIMMPLDECVEYVVDKNYAEKALKRTINWLESI  
ELTPEHSIEIQQALGSDVAMVLDHVIALPAPMTQVEDALARSIRWAARCK  
FLDPARATAIQEALGADIIMAFDECTIPYPCDKYAAASTRKTIRWAEACK  
LFTPEKVVSIQRNLNSDIMMVLDECVPYADKDYATARS�KMTTRWAQRCK  
TIRPEDAVAIQEALGSDIAMCFDECTPPYATHDYARRSMELTRWRARCK  
FLTPETSMEIQRTLSNDIVMIFDECTPPYATERQAADSMRMSLRWAARCK  
FLSPEKSMEQDLGSDIVMIFDECTPPYATFDYAKKSMEMSLRWARRSR  
FMGPEESMQVQRDLGSDIVMIFDECTPPYADEVARVSMELSLRWARRSK  
FISPEKSIQIQNLSGSDIVMIFDECTPPGLSTREYIIPSIERTTRWAKRCK  
FLSPEKSMEQIHLGSDIMMAFDECTPPYADHSYMKASVERTSRWAERCL  
FLSPEKAIQIQNALGSDIMMSFDECTPPYASHEYMKKSVERTSRWAERGL  
ELSPERAIEVQRLLGSDIAMQLDECVRLLPADRADIERAMQLSLRWARRCK  
ELTPERSMEIQRLGSDIVMCFDECTPALPADRDRIAESMRMSLRWAARSR  
MLTPEYSTEIQYLLGSTITMALDECTPPYSPSTFEKAKTSMHLTRWANRSR

: : \*

42520578\_Wolbachia\_endosy  
58613533\_Heterocapsa\_triace  
45656892\_Leptospira\_interr  
19068923\_Encephalitozoon\_cunic  
3881825\_Caenorhabditis\_elegan  
56473322\_Entamoeba\_histol  
46229743\_Cryptosporidium\_parvu  
TP000008041\_Trimastix\_pyriform  
12597314\_Homo\_sapient  
60463331\_Dictyostelium\_discoi  
62360604\_Trypanosoma\_brucei  
50900348\_Oryza\_sativa  
JB000061016\_Jakoba\_bahamensis  
28850382\_Dictyostelium\_discoi  
116059209\_Ostreococcus\_tauri  
CM2163\_Cyanidioschyzon\_merolae  
46446428\_Parachlamydia\_sp.  
76788915\_Chlamydia\_trachomat  
29840339\_Chlamydomonas\_caviae  
11499080\_Archaeoglobus\_fulgid  
21674218\_Chlorobium\_tepidu  
48855206\_Cytophaga\_hutchi  
53713592\_Bacteroides\_fragil  
76258051\_Chloroflexus\_auranti  
15644309\_Thermotoga\_mariti  
6460406\_Deinococcus\_radiod  
48891338\_Trichodesmium\_erythr  
56751072\_Synechococcus\_elonga  
20455294\_Nostoc\_sp  
46106898\_Rubrobacter\_xylano

NEFEKQALYGISQGGVYQDLRRESCDFINDLPFFGQAIGG-SLGSKEQM  
TEFAAQALYGIQGGVHEDLRAESVAFVNRQPFPGTAIGG-SLGADRATM  
QYWEKQHLFGIFQGGIDLDFRLESNTITSLPFDGIAIGGLSVGEPKDF  
MAVNDQILFPIIQGGLEGLRAESIAEILKRSKGLAIGGLSGGEEKSEF  
VAHTRQAMFPIQGGNLELRKECAKEMAKRAKVGIAIGGLSGGEEKDFH  
NEYLQNLNFIQGGLPNLRERCLEGMVKVDTPGYAIIGGLSGGEEKDDF  
KAHKKQNLFAIVQGGIFKDLRERSLKSLEKERNTPGYAIGGLSGGESKDSF  
AAHKRQNLFAIVQGGIDPRLRTMCAEMKRRDIPGYAIGGLSGGEDKNLF  
AAHQRONLFAIQGGIDADLRATCLEEMTKRDPVGFYAIIGGLSGGESKQF  
KAHKKQNLFAIVQGGIDSRRLRDCMEGLMAREFFGYAIGGLSGGESKDMF  
AANANQIFGIVQGGIDSLRSCMEEMVKKRCKGYAIGGLSGGEEAKQF  
AAHKKQNLFGIVQGGIDPVLRLDICVKGIVERNLPGYAIIGGLAGGEDKDSF  
QAHKRQNLFAIVQGGIDAELELRYCAEELVRRDLPGYAIIGGLSGGEEKDDF  
LEHIKQAIYSVIHGGVNIEMRQSIDYLTSLPFDGIALGG-SLGKDRNEM  
RAHLSQAMYGVVHGGVDRDLRRASVEYLSALPFDGMAIGG-SLGRDSTEL  
REHLHQAMYAVIHGGIDLELRKSVEYLTALPFDGIAIGG-SLGKDREEL  
EAHLKQAMYAVVHGGIDPDLRRESKALITELPFDGFAVGG-SMCKTKDEM  
DYHLKQSMYGVHGGTFPDQRKLGCKFVEDLPFDGSAIGG-SLGKLNQDI  
DYHKKQSMYGVHGGIDPEQRKIGCQFVEDHPFDGFAIGG-SLGRNLQEM  
QHYDRQALFGVQGGVEYRDLREKSAREFMAERDFAGYIGG-SLGKSKQDM  
KHFLSQFQGITQGGTFDDLRHSSRALVMDPFDGYAVGGMVAGPAEEM  
TRMAEQHLFPIVQGSVYKDLRLKSAEIVAEAGCVGNAIGGLSVGEPAEEM  
QRFNEQSILFPIVQGCVPDLRQSAEYIASKDADGNAIGGLAVGEPVDMK  
IAHQRLQLFGIVHGGIFPDLRRASACYISDMAFDGLCTIGG-SLGANKTQM  
KAFKTKQALFGIVQGGIYVDPDLRRSALQLTSTIGFDGYAIGGLSIEERSLT  
AVKTKQALFAIVQGGVHEDLRLKSLEATLPFATPGFAVGGVAVGESKEEM  
EAHQRLQALFGIVQGGVPELRSIAARQLVDLDPGYAIGGVSVEGPEGLI  
NAHERQALFGIVQGGVYLDLRLQAARDLVQDLPGYAIIGGVSVEGPESEI  
TAHQRLQALFGIVQGGVYLDLRAKANTLTELDPGYAIGGVSVEGPEPEM  
KAHSRQALFGIVQGGYVLDLREESLRRLELDFDGYAVGGLSVGEPREMR

42523694\_Bdellovibrio\_bacter  
15611336\_Helicobacter\_pylori  
15606515\_Aquifex\_aeolic  
32397050\_Rhodopirellula\_baltic  
39996277\_Geobacter\_sulfur  
23473888\_Desulfovibrio\_desulf  
39997713\_Geobacter\_sulfur  
52006768\_Thiobacillus\_denitr  
53732897\_Haemophilus\_influe  
48730213\_Pseudomonas\_fluore  
19715156\_Fusobacterium\_nuclea  
56963323\_Bacillus\_clausi  
16800633\_Listeria\_innocu  
39935672\_Rhodopseudomonas\_palau  
52011430\_Silicibacter\_sp.  
15604558\_Rickettsia\_prowaz

AAMTRSLFLFGIVQGGSLKHLRKSMEQICSVLDLPGYALGGFVSVEPMHLM  
EYHKENNLFAIIQGGTHLKMRSLSV-GLTHEGFDGYAIGGLAVGESVDEM  
KAKKROVLFQVQGAFFWKDLRKAVEETLKFDFLFGYSIGGLSVGEPKEIM  
IAADRQALFAIVQGGDLRTRQQCASELAAMSFEGYAVGGLSVGPEPDM  
KAHTRQALFGIVQGSVFEDLRAQCARELVQLDFPGYAVGGVSVGEGLELL  
DAYPANLMFGITQGGFFKDLREESIGELTRIDFDGFGALGGLSVGESKTEM  
DARRRQALFAIVQGGMYRDLREQSAELVEIGFDGYAVGGLSVGEEKEHM  
AAHAGNALYGVQGGMYEALRDESARELIGMDFDGYAIGGLSVGEPKDDM  
DRFDENALFGIIQGGVFEELRKSLSLEGLVNIIGFDGYAVGGLAVGEPKEDM  
NAHGDAALFGIVQGGMHQDLRMRSLGLELKDIGFDGLAIGGLSVGEPKHEM  
EAHQKQGLFAIVQGGIYEDLRQKSLDELSEMDFSGYAIGGLAVGEPREDM  
AEHKKRQGLFGIIQGGYEDLRKQSANDLTALDFPGYAVGGLSVGEPKDDM  
KAHERQGLFGIVQGGAYEDLRAQSAKDLVSLDFPGYSIGGLSVGEPKDDM  
RAFETYMLFGIVQGGVPELRHASAQLIDIGFHYAIGGLAVGEPQDDM  
EAFGDHFLFGIVQGGLEQDFREESAELTKIGFDGYAVGGLAVGEGQEM  
DAFVYKQAFGIQGSVYKELREQSVKDLVKCDFEGYAIGGLAVGEGQELM  
: : \* \* \* \* \* : \* \* \* : \*

42520578\_Wolbachia\_endosy  
58613533\_Heterocapsa\_triique  
45656892\_Leptospira\_interr  
19068923\_Encephalitozoon\_cunic  
3881825\_Caenorhabditis\_elegan  
56473322\_Entamoeba\_histol  
46229743\_Cryptosporidium\_parvu  
TP000008041\_Trimastix\_pyriform  
12597314\_Homo\_sapien  
60463331\_Dictyostelium\_discoi  
62360604\_Trypanosoma\_brucei  
50900348\_Oryza\_sativa  
JB000061016\_Jakoba\_bahamensis  
28850382\_Dictyostelium\_discoi  
116059209\_Ostreococcus\_tauri  
CM2163\_Cyanidioschyzon\_merolae  
46446428\_Parachlamydia\_sp.  
76788915\_Chlamydia\_trachomat  
29840339\_Chlamydomydia\_caviae  
11499080\_Archaeoglobus\_fulgid  
21674218\_Chlorobium\_tepidu  
48855206\_Cytophaga\_hutchi  
53713592\_Bacteroides\_fragil  
76258051\_Chloroflexus\_auranti  
15644309\_Thermotoga\_mariti  
6460406\_Deinococcus\_radiod  
48891338\_Trichodesmium\_erythr  
56751072\_Synechococcus\_elonga  
20455294\_Nostoc\_sp  
46106898\_Rubrobacter\_xylano  
42523694\_Bdellovibrio\_bacter  
15611336\_Helicobacter\_pylori  
15606515\_Aquifex\_aeolic  
32397050\_Rhodopirellula\_baltic  
39996277\_Geobacter\_sulfur  
23473888\_Desulfovibrio\_desulf  
39997713\_Geobacter\_sulfur  
52006768\_Thiobacillus\_denitr  
53732897\_Haemophilus\_influe  
48730213\_Pseudomonas\_fluore  
19715156\_Fusobacterium\_nuclea  
56963323\_Bacillus\_clausi  
16800633\_Listeria\_innocu  
39935672\_Rhodopseudomonas\_palau  
52011430\_Silicibacter\_sp.  
15604558\_Rickettsia\_prowaz

HDVVSFTMDHLKDRPHLLGIGGIVDIFRQVGLGIDTFDVCVHPTRLARH  
HAVVGYTAARCRPDRPIHLLGIGGIRDIFHGVRGIDTFDVCVHPTRLGRH  
IRILDGISAHTDRNRPLLYLMGVGTVPDILDGVKNGVDMFDCVLPTRNARN  
ARIVHFCTKSLPPDIPRYLMGVGYPEDIVVCVALGSDMSDCVYPTTRARF  
WRVVAACCAALPPLPRYVMGVGFPVDLVICSLFGADMFCVYPTTRARF  
WKMVDISAQGLPENKPRYLMGVGYPVEMLLCVLFGVDMFDCVYPTTRARF  
WQIIEICTRSELPENKPRYVMGVGYPIDILVVALGADMFCVYPTTRARF  
WRVVHCTSELQNKPRYLMGVGYPDLVLCVALGADMFCVYPTTRARF  
WRMVALSTRPKDKPRYLMGVGYATDLVVCVALGCDMFCVYPTTRARF  
WRVVHCTSKLLENKPRYLMGVGYALDLVVCVALGDMFDCVYPTTRARF  
WAIWAQCKTLPNDKPRYCMGVGYPEDIVVICALGDMFDCVYPTTRARF  
WRVVAQCTAGLPEDKPRYVMGVGYPDLIVVCVALGDMFDCVYPTTRARF  
WRMVSSTVDLPRNKPRYCMGVGYPDLVVCVALGDMFDCVYPTTRARF  
KELLKTIIPFIPKKNPHLLGIGDLESITSIIPLGIDSFDSYPTTRARH  
GSLEFLMLPKDMPNHLGIDSVENVDRAVMLGVDTFDSAYTTQVARR  
LALLAFDLTLLPKDRPVHLLGIADEESIRRAVPYGDITFDSYPTTRAGR  
HTLLSLLPLLPEDKPNHLLGIDLPSTIERSVPLGIDTFDSSYPTTRARH  
VEVVGTAANLSAERPHLLGIDLPSTIERSVPLGIDTFDSSYPTTRARH  
LPVVDVTSYLSKDRPVHLLGIDLPSTIERSVPLGIDTFDSSYPTTRARH  
LNILDVWVPLLPPEKPRHLLGIAIEDLFCNTEKGVDMYDCVAPARWARR  
YRMLLSHTILPESKPRYLMGVGTANILNIAERIDMFCVYPTTRARH  
YAMSELVCSVLPKDKPRYLMGVGTENLLENIALGDMFDCVMPTRNARN  
YEMIELVNEILPKDKPRYLMGVGTENLLENIALGDMFDCVMPTRNARN  
YEVVDMTVPYLPDGMARHLLGVGDVDDLLEGVARGIDMFCVSPTRLGRH  
LEMTEVTEVFLPEDKPRYFMGGGSPLELILELVDGRVDMFDCVYPTTRARH  
YPAVAFTAGRLPENKPRYLMGVGHPEDLVAGVALGDMFDCVYPTTRARH  
DHIVVITPFLPEDKPRYLMGVGTYREMRVRAEAGIDLFDCVYPTTRARH  
HRIVEATAPLLPAHKPRYLMGVGTYREMVQAIAGIDLFDCVYPTTRARH  
AQIVQATAPLLPAHKPRYLMGVGTYREMVIAIAGIDLFDCVYPTTRARH  
LEILSLLTPRLPEDRPRYFMGIDPVGILEVIALGDMFDCVLPTRLARH  
HALLPDAVPRMPANKPRYLMGVGTPTDLIIAIDSGVDMFDCVMPTRNARN  
LETIAHTAPLLPKDKPRYLMGVGTENILDAISLGVDMFDCVMPTRNARN  
YGMTEVVCCELLPEKPRYLMGVGKPEDILEAVERGDMFDCVYPTTRARH  
YTTTVEYTPHLPADKPRYLMGVGTPRDLLENIAAGIDLFDCVYPTTRARH  
KKVVEYTAFLPENKPRYLMGVGLPELILESVRGMDFDCVYPTTRARH  
MDILYHTAPMLPAHKPRYLMGVGTPLDIINGINAGIDMFCVLPTRNARN  
YGVMEWTAPLLPVDQPRYVMGIGTPELVEAVWRGDFMFCVMPTRNARN  
TRILAHATAPLPADKPRYLMGVGTSPDLVAVAAGIDQFDCVLPTRNARN  
HRILEYICQIPADKPRYLMGVGKPEDLVEGVRRGIDMFCVMPTRNARN  
IKVLDYLPGMMPADKPRYLMGVGKPEDLVEGVRRGIDMFCVMPTRNARN  
YRILDYIVEKPEKPRYLMGVGEPDMLNAVESGIDMMDCVQPTRLARH  
NHVLEFTTPLMPEDKPRYLMGVGSPDSLIDGAIRGIDMFCVLPTRNARN  
NRVLEHTTPLLANKPRYLMGVGSPDSLIDGIVRGVDMFDCVLPTRNARN  
LAMIEEAAPILPAERPRYLMGVGTPEMDEAVARSIDMFCVMPTRNARN  
FGCLDYAPDMLPVDKPRYLMGVGKPDIVGAVSRGIDMMDCVIPSRSGRT  
FRVLDYVDFLQNKPRYLMGVGKPSDIIGAVSRGIDMFCVLPTRNARN  
. : \* . : \* \* . . : \*

42520578\_Wolbachia\_endosy  
58613533\_Heterocapsa\_triique  
45656892\_Leptospira\_interr  
19068923\_Encephalitozoon\_cunic  
3881825\_Caenorhabditis\_elegan  
56473322\_Entamoeba\_histol  
46229743\_Cryptosporidium\_parvu

GGALHINLRNQRFELEDNPNIESDCLCFTCRKHSRAYIHLLKAKELLTLV  
GGALHIHLEKARFRDDIRPIDSTCGCYTCRNFSTRGYLHLLRAQETLTLA  
GQVFKINLRNEKWKSSDTPMDPNCTCKVKRYSIGYIRHLHVGEITSL  
GKGLDVCF-TSKLKSDDRKIDETCGCYTCSKYSRAFLFALKGTTF-MLL  
GTAMLMLQLNKRKYKEDFLPIDKCECNCKNYTRAYIHSIVG-KETVHLV  
GTAFLVTLNKYKDDFNVIDESCDCLCKGNTKSALHFMFTNGAVDQYL  
GTAMLLKLLSKYKDDARPIDSRCKCYCKHYSRALYRIVLKDLSLAQLM



TPO00008041\_Trimastix\_pyriform  
12597314\_Homo\_sapien  
60463331\_Dictyostelium\_discoi  
62360604\_Trypanosoma\_brucei  
50900348\_Oryza\_sativa  
JB000061016\_Jakoba\_bahamensis  
28850382\_Dictyostelium\_discoi  
116059209\_Ostreococcus\_tauri  
CM2163\_Cyanidioschyzon\_merolae  
46446428\_Parachlamydia\_sp.  
76788915\_Chlamydia\_trachomat  
29840339\_Chlamydia\_caviae  
11499080\_Archaeoglobus\_fulgid  
21674218\_Chlorobium\_tepidu  
4885206\_Cytophaga\_hutchi  
53713592\_Bacteroides\_fragil  
76258051\_Chloroflexus\_auranti  
15644309\_Thermotoga\_mariti  
6460406\_Deinococcus\_radiod  
48891338\_Trichodesmium\_erythr  
56751072\_Synechococcus\_elonga  
20455294\_Nostoc\_sp  
46106898\_Rubrobacter\_xylano  
42523694\_Bdellovibrio\_bacter  
15611336\_Helicobacter\_pylori  
15606515\_Aquifex\_aeolic  
32397050\_Rhodopirellula\_baltic  
39996277\_Geobacter\_sulfur  
23473888\_Desulfovibrio\_desulf  
39997713\_Geobacter\_sulfur  
52006768\_Thiobacillus\_denitr  
53732897\_Haemophilus\_influe  
48730213\_Pseudomonas\_fluore  
19715156\_Fusobacterium\_nuclea  
56963323\_Bacillus\_clausi  
16800633\_Listeria\_innocu  
39935672\_Rhodopseudomonas\_palu  
52011430\_Silicibacter\_sp.  
15604558\_Rickettsia\_prowaz

GTALVIHLRSDFALSKEPIDAQRHMCVCHYEYTMGRHLQLACHE--GELI  
GSALNLQLRKKVFEKDFPIDPECTCPTCQKHSRAFLHALLHSDNTAHL  
GTALSLLNKSSYAFDFTPIDSECTCMVCKNYTKAYLHIVAGKEAIGQLL  
GSALKIQVSKVYANDMGPLDPECNCMTCKTFTRAYL-HIVAAKESITLL  
GTALVLLKQAMATDERPIDPTCPCMVCKNYTRAYLHCLVTKDAMGQLL  
GTALQLDLKNPRFADDATPLCVFESWHG-RHYSRSYLHRLMLEKEEAA--  
GQIILIKNQENRIKID-EPLDKSCDCHTCKNYSKAYLHHLFKSHEQITLA  
GTLFRINFRRAEFRSREPACHECDCTLCSKHSGLYHLHLDRANEPLTLA  
GTLRLRIQIKSRKWERVEFVDTTCEGFVSNHTLAYLHHLWRAHEPLALL  
GILLPLNITKSEYATNFNSIEKGCLCPACHHFLAYIHHLFKARELTSLA  
GMILPLKINNQRYSDDLNPTEPGCSCLACQGITRAYLRHLFKVHEPNIWA  
GLILPIKIANQAYANDLSSLDPECTCATCSNISRAYLRHLFKVHEPNIWA  
GHLYRIHIKNAAFRIDNRVPVDRTCDCLVQNYSRAYLRHLFKANELLRLA  
GRVYITINLRAGKYADDFRPIDEGFDNHVCRNYSRAYLRHLNVLGEIILK  
GMLFIINIRNKWENDFTPLDQGLDIYLDNYTKAYLHHLVHNEMEQIA  
GMLFIMNMRNKWEADFSPIEADGASVVDTLYSKAYLRHLFHAQELQIA  
GAALRLNVTNAALRDDRQPLQEGCPCYTCRHFSTRAYLHHLYSKELRLV  
GTALRLNLKNAKFRDFAPIDEPCPCYACQNFSTRAYLHHLVRSQEIITLL  
GYALRLNLNSSAPRTQLQPIDAECDCYACRHYTRAYLAHLRAEEMLRML  
GAALRWNLKNARFKEDFRPLDEFCPCYCCQNFSTRAYLSHLVRAKEALTLL  
GAALRWNLKNAQFREDFQPLDEDCNCCYCCQNFSTRAYLNHLIRSREILTL  
GTAMRWNLKNAKFRDFAPIDEPCPCYACQNFSTRAYLSHLVRSQEIITLL  
GTALRLNLKNARYRRDFGPLDPGCPCEACAGFSRAYLAHLRENELRLV  
GTIYKVISIKRSEYKEDPSALDPECDCYTCCKNYSKAYLRHMFMSGEILRLN  
ATLFKISIKNAPYKLDPTIEENCACYACKRYSKAYLHHLFRAKELTRLA  
GTLYVVDIRHSHKWKEDFSPDLDEDCYTCRNFSTRAYLRHLVRSQEIITLL  
ALAFPLKLRNAVHKLDRPLMEDCPCLACRH-SRGYLRHLFVAGEMILL  
ATLFKIRLTHRNRYRRDFYVDPNCTCYTCRNFSTRAYLHHLFNANEILTLA  
GTLYKINIKREFAEDDGPLDPNCSCYTCRFTSRAYLRHLFHAQEIILRLN  
GMLFRNLKGAAYAEDQGPVDPACGCYVCRNYSRAYLRHLVRSQEIITLL  
GILFEIRIRNARWKLDTAPIDEEDCYACRHFTRAYVHHLIRAGEILRLT  
GHLFIVKIRNARYRDTNPLDPECDCYTCCKNYTKAYLHHLKDCGEMLRNL  
GHLFVLRKIRNARYRHRHDDSPLDPTCDCYTCQNFSTRAYLHHLKDCGEMLRNL  
GTVFRLVIKSERYKEDTKPLDEEDCYVCKNYSRAYLRHLIKVQEVMLRLT  
GTCMRLVVRNARYRDFSPLEKDCDCHVCRYSRAYLRHLIKCEETFRILT  
GTCMRLVIKNAKFTHDFRPIDENDCYTCCKNYSRAYLRHLIRCEETFRILT  
GLAFPINLRNARHADDPRPLDEESDWPARTYSRAYLHHLVRSQEIITLL  
GQAFVVKIKNARHODDPRPLDENCSPPACSNYSRAYLHHLVFRSNEMIMLL  
GQAFVVKIRNSKYADDKPELHDCCKPACTNYTKAYLHHLVRIREILMLM  
.  
: . : :

42520578\_Wolbachia\_endosy  
58613533\_Heterocapsa\_trique  
45656892\_Leptospira\_interr  
19068923\_Encephalitozoon\_cunic  
3881825\_Caenorhabditis\_elegan  
56473322\_Entamoeba\_histol  
46229743\_Cryptosporidium\_parvu  
TPO00008041\_Trimastix\_pyriform  
12597314\_Homo\_sapien  
60463331\_Dictyostelium\_discoi  
62360604\_Trypanosoma\_brucei  
50900348\_Oryza\_sativa  
JB000061016\_Jakoba\_bahamensis  
28850382\_Dictyostelium\_discoi  
116059209\_Ostreococcus\_tauri  
CM2163\_Cyanidioschyzon\_merolae  
46446428\_Parachlamydia\_sp.  
76788915\_Chlamydia\_trachomat  
29840339\_Chlamydia\_caviae  
11499080\_Archaeoglobus\_fulgid  
21674218\_Chlorobium\_tepidu  
4885206\_Cytophaga\_hutchi  
53713592\_Bacteroides\_fragil  
76258051\_Chloroflexus\_auranti  
15644309\_Thermotoga\_mariti  
6460406\_Deinococcus\_radiod  
48891338\_Trichodesmium\_erythr  
56751072\_Synechococcus\_elonga  
20455294\_Nostoc\_sp  
46106898\_Rubrobacter\_xylano  
42523694\_Bdellovibrio\_bacter  
15611336\_Helicobacter\_pylori

TIHNIFFMKNKLMASTRQAILDDRL  
SLHNVYFVNRMMAAIRVAIRNGTL  
TYHNLHFMKNFLTEIQNSIQKGEF  
TIHNLNYMRSLTRRIRRESITEDRY  
SVHNIKHQDLMDRVRQAIQNSV  
THHNISYLFNLMRKYRVAIREGKS  
TIHNIFFMMEFCNDRNAIKNQTF  
TMHNIAYQMRHMQRIRDAIKGGTF  
TVHNIAYQLQLMSAVRTSIVEKRF  
TFHNIHYQMSLMSQIRQSIIDQTF  
SYHNLAYLINLTRGAREAILSGETF  
SYHNLSPFMMRLSRDLHMSILEGRF  
-----  
TQHNLRAMSRLMENYRNKILQNEV  
SEHNLFMGQKMARVREIRILNDEI  
TLHNIKYMCDVMREIRTRILADEL  
TVHNLVFMVQLMEKYRKQIQEDLI  
SIHNMHHMQVMREIREGILNDRI  
SIHNLHYMQEVMKNIREQILNDEI  
TYHNIYFVVKLMERIESIADGSF  
TMQNLSFYLWLTTRTAREHIAAGDF  
TIQNISFYLWLMREARKQIVAGTF  
SIHNLAFYLWLVGEARKHIIAGDF  
SLHNVAFLLNLMADIRSALAGR  
TIHNIINFMISLMKEVRSIESGTF  
SLHNLRYLHRLVERMRVAINGQF  
SLHNVTELSIFTRIRDAIKDRF  
SIHNI TELVRFTRIRREAILSDF  
SIHNI TELIRFTQKIREAILSDF  
SLHNVRFVTELCRSARREILAGTY  
TIHNIHFYMKVMEKAREIAAQGRW  
SLHNLHFYLELVKNARNAILEKRF

|                                |                          |
|--------------------------------|--------------------------|
| 15606515_Aquifex_aeolic        | TIHNLRFYLKMMEEVRKAIEEKRF |
| 32397050_Rhodopirellula_baltic | SHHNLMYGRLMQATRDAIEAGEF  |
| 39996277_Geobacter_sulfur      | SIHNVHFYLNMMAEIRAAIEEERF |
| 23473888_Desulfovibrio_desulf  | SIHNLTYFLDLVRGAREAIAQGTf |
| 39997713_Geobacter_sulfur      | TYHNLAYYLDLMAQIRTAIAEERF |
| 52006768_Thiobacillus_denitr   | TLHNLHYHRLMAEVRAAIDAQRf  |
| 53732897_Haemophilus_influe    | TIHNLRYQRLMAEIROAIEDDRf  |
| 48730213_Pseudomonas_fluore    | TIHNLRHYQVLMAGLREAIQQGTl |
| 19715156_Fusobacterium_nuclea  | SYHNLTYFLIKLMDAREAIKEKRF |
| 56963323_Bacillus_clausi       | TYHNLTYFLNLMKQVRQAIMDDCl |
| 16800633_Listeria_innocu       | TYHNLHFLLNLMKQVRSAIMEDRl |
| 39935672_Rhodopseudomonas_palu | SEINIAYYQRLMRDIRAAIAGVQf |
| 52011430_Silicibacter_sp.      | TWHNLHYFQDIMAGMRESIAAGTf |
| 15604558_Rickettsia_prowaz     | TWHNLTYFQNLMSRIRTYIKLGKd |

**Note:** This is an intriguing case of ancient HGT. The *Dictyostelium* sequence forms a group with homologs of green and red algae as well as chlamydiae. This specific affiliation of *Dictyostelium* and plant sequences has been observed in multiple cases (Huang, unpublished data), likely resulting from plant-*Dictyostelium* transfer. A plausible explanation is that primary photosynthetic eukaryotes acquired this gene from chlamydiae and then further spread to *Dictyostelium* via secondary gene transfer. *Heterocapsa* sequence is a chloroplast precursor based on the original GenBank annotation. *Heterocapsa* and *Wolbachia* sequences also share indels and many conserved residues. The remaining eukaryotic sequences are much more similar to bacterial than to archaeal homologs, and they are likely of bacterial origin. One possible explanation is that they are derived from mitochondria. Nevertheless, most of these eukaryotic sequences lack a N-terminal extension. Sequences of *Trimastix* and *Jakoba* were obtained from TBestDB.

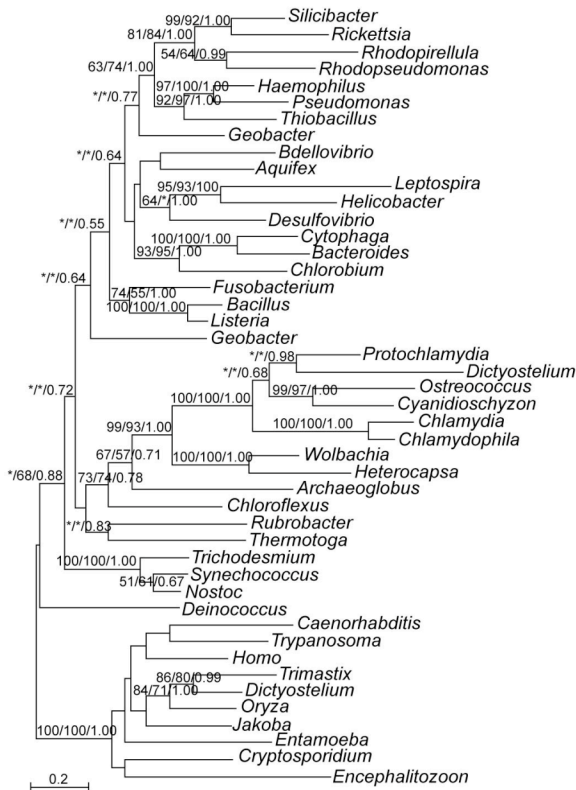

**Figure 13.** Molecular phylogeny of queuine tRNA-ribosyltransferase. P-value = 0.369 from the AU test for the presented gene tree. AU tests were also performed on alternative topologies including (A) monophyly of all eukaryotic sequences, and (B) monophyly of red algal, green

plant, *Dictyostelium*, and cyanobacterial sequences. These tests investigate if all eukaryotic sequences have the same origin (mitochondrial or eukaryotic) and if red algal and green plant sequences are likely derived from plastids. P-values < 0.001 from AU tests for both alternative topologies.

#### 14. SAM-dependent methyltransferase (N)

CLUSTAL X (1.83.1) multiple sequence alignment

```

23509703_Plasmodium_falcip      INGFPWLYSKDIEYNENIGVGIYNRNSIISSRLLEFFNIRIRKAYEKRLE
16080887_Bacillus_subtil      KKGYPPIEKEALSGGEFLARGYYGLQNKGVGWTLAFFLSKLT'KAAQARAT
29375834_Enterococcus_faecal  KKGYPPIQKEDLSKGQRLAEGYLGEQNKIGWLLSFFQQLFEISREKRTT
54294134_Legionella_pneumo    LRGHPIWIFPKAISEGESLGFAYNEHSLYRVVLSLITHRIKQASLVRRT
42571865_Arabidopsis_thalia   KDGSPMVYSGAVGTENPIGWGLYNSVSMFCVRLMKLLQTRIAEAVQLRKT
CM2295_Cyanidioschyzon_merolae  QSVRPLIFGRAITPGPVLGYGFYNPDSMYRVRLIRVLT'RLFTAAWLREH
42522494_Bdellovibrio_bacter  KQGRHRLFANCFYKGEALALGIWQGD'TQLRFRVLLYFENQWRKAVEIRKT
14600479_Aeropyrum_pernix     ARGSSIIYRKWVRNGSEIACGLWEENTPVAVRIIEALERALEAAYKARVF
42524664_Bdellovibrio_bacter  RSGHPWVFSNELSKGQFLARGYGNPHSLISFRALDFLHEKIFNSWRVRRK
39998234_Geobacter_sulfur     QLGHPWI'IADAYASGRFLATALLD'PGERIVARVLRWLAQRLEDALELRRT
34763641_Fusobacterium_nuclea  LNFYFPIYKDEISDMKFLARGYITEGTS'AFVRIKLFIFERIKNAYEKRKT
6457710_Deinococcus_radiod    RDGHPWVYESSVRRDRFLAIGLYDPF'SPLRLRVLAWWAARLDAALARRAT
32444786_Rhodopirellula_baltic  LSRHPWVMANALYDGNWIARGLINPASRLRIRLYSMWAERIEQAVARRQ
21110809_Xanthomonas_axonop   RSSHPWIFQKLVMDGEWIGR'GFYNGHSRIAIVRILGWFSR'KIAAAVSLRRS
15837009_Xylella_fastid       RSSHPWLFQKLLVDGEWVGRGFYNGHSRIAIVRILAWFVRIAEAVGLRRS
53797508_Chloroflexus_aurant  QQGHWPVYRNHLR'CGGLTVYGLYDEQSP'IGLRIYSWFRERVWEAWELRAT
22960169_Rhodobacter_sphaer   RHGFPWVYADELAERRALGLVTVNVSSKI'IAARL'GWFAERL'TRALALREQ
56679104_Silicibacter_pomero  RHGAPWVFDNEVDNRAPLGLVAVNPGSR'ILARMLAWFEARL'TRALALREA
15605998_Aquifex_aeolic       KHFPWPVFRDEVSEGNF'LALGTYS'PYSRIA'FRVLEFF'KRRLRESELLRRS
34556476_Wolinella_succin     R'LP'AWIYGSQ'LPKQEF'LALGYINPKSQ'IALRILEELK'KR'KQAKILKRET
46446677_Parachlamydia_sp.    RNYHHWIFSGAVSSHQLLGYGFNRRS'GIVGRMVETL'KKRLISAWKFRQ'T
53712322_Bacteroides_fragil  KR'FHPWIFSGAISKKEF'IAKGHFQ'IGS-IAVRVLD'FWKH'KLEVAIDMRRN
48854326_Cytophaga_hutchi    NNRHPWIFSGAVFENK'KLG'YGF'LSHKSQ'IVCRMFNYWAVKLN'AFALRQ'T
20094503_Methanopyrus_handle  RSGALSVFAPAVATGDFLGYAFAQTS'DRIVARIFEIVLERI'ERRYFR'KRK
14591657_Pyrococcus_horiko    KKGAMIYFVKGVRRGGKFLGKGFANPNS'NIMVRI'VDL'FKRRIKANEYRKT
15607037_Aquifex_aeolic       RGFPPWVYRSEIVNGKFLGYGYINPEV'NIAIRILELIRKRIKQAYEYRKS
53796614_Chloroflexus_aurant  IQRHPWIFSGAIKDGSW'LARGFWSST'SQLRVRLATW'LRETIARAVAGREA
26246990_Escherichia_coli     LRRHPWVFSGAVHQGKWLARGAYSPASQ'IRARVWAF'FTRRLQQAQKWRDL
29142267_Salmonella_enteri    LRRHPWVFSGAVHQGKWLARGAWSPASQ'IRARVWAF'FTRRLRQAQQWRDL
47573089_Rubrivivax_gelati    LRRHPWVFE'GSIHDGSFLAWGAYSPASQ'IRVRAWSLFARRVERAVALRAS
48770381_Ralstonia_metall     LRRHPWVYATG'ADGRFLARGAYSPESQ'IRARVWAMF'KRRVSAALAH'RK
48786339_Burkholderia_fungor  LRRHPWVYANA'IDHGRFLARAAYS'PHSQ'IRARVWAF'KRRVQ'RALAHRQ'T
21674038_Chlorobium_tepidu    VSGHLWVFSNELHDGRL'LGAGF'FN'PQSLIAFRLLD'FFR'KLEALK'LET
15644445_Thermotoga_mariti     SGGHLWIFYNEIPDGSF'FGKYINDNSKIRVRI'LNFIKNRIE'ALKR'KKT
39997720_Geobacter_sulfur     RGGHPWVFSNET'IGGGFLGTGYN'PRSLIAARLLD'FFLERI'GRALALRRM
46199218_Thermus_thermo       LSRHLWVFRDRD'VGR-RFLALALYNPHT'DLAVRAYA'ALLENLAQALARREG
48857855_Clostridium_thermo   KDGHPIWYGE'EIAGNAFM'GTGFYNSVSKITVRLIR'FWR'RRVEYAVRYRKF
37523934_Gloeobacter_violac   RRTHPWI'FASEVAQGRFCGRGFLNRQSQ'IAVRYLAWWIERFGKALEHRHV
51894272_Symbiobacterium_therm  QAGHPWIFQGEVFRGRL'LGKGYINPASQ'ILVRL'LEFFRRRLERAWAYRQ'T
:
:

23509703_Plasmodium_falcip      NFRVVAESDFLPGI'IDKYNKLV'CVQINASGMDII'IIKNDNIEVQEN
16080887_Bacillus_subtil      TAFRLFN'GEGD'GVGGVTIDY'YDGYLLIQWYSKGIYTAIYEK'KR'FIIQEN
29375834_Enterococcus_faecal  TAYR'LFN'GEGDIGGLI'DRYADYAVF'SWYNETLYQ'GAYEKIR'FL'LV'TEN
54294134_Legionella_pneumo    NAYR'LFN'SEADGLSGLTIDCFNDYCVIASSAYWV'ELHI'IWLPQNTQVLEE
42571865_Arabidopsis_thalia   NAYR'LVN'SEGDRLSGLIVDVFGDI'AVVASSAAWLEKHINWRP'SLSMVVEN
CM2295_Cyanidioschyzon_merolae  AACRLINGEGDRVSGLCIDLYARYLVQSSARWVEHEL'VWRSNSTWITEH
42522494_Bdellovibrio_bacter  NSFRLINGEGDGLPGLIVDVYNDTAVIK'DHPIMEKCVYLKRRNVQ'FLEN
14600479_Aeropyrum_pernix     DSYR'LINS'DGDRLSGLIADVYKDVAVVQSSPAIDRHVY'EKSVQV'VEEG
42524664_Bdellovibrio_bacter  GSFRLAFGESDFIPGLVLDY'YQAQLFAQLV'TAGMNEAVVIRNDVIVL'NAA
39998234_Geobacter_sulfur     DAYR'LVN'GEGDGLPGITVDRYGDYLMVQ'LYCGGW'RP'GIYEKTR'PLPVREN
34763641_Fusobacterium_nuclea  NSVRAFYS'EA'DFIPGLI'IDKFDKYVSIQFRNSGVEVGIYERSDV'TIMVDN
6457710_Deinococcus_radiod    DGYR'LVN'GESDGF'PGLVVD'RYAGVLMKLYTAAWFPV'VLR'LSRNVV'FRES
32444786_Rhodopirellula_baltic  GGERLIFSES'DRMSGLIVDRYADCLSIQITGGALIPKVLV'RMDDVWYQHN
21110809_Xanthomonas_axonop   DAWRVVHSEGDGLSGLVVD'RYGDLLV'VEFFAAGMFR'RFHSHFADEAVITEH
15837009_Xylella_fastid       DAWRVVHSEGDGLSGLVVD'RYGDLLV'VEFFAAGMFR'RFHSHFADEAVITEH
53797508_Chloroflexus_aurant  TAYR'WIY'GEGDNL'PGLVVD'RYGDYAVIQTYADSVQ'TGVIQR'PQLVQEH

```

22960169\_Rhodobacter\_sphaer  
56679104\_Silicibacter\_pomero  
15605998\_Aquifex\_aeolic  
34556476\_Wolinella\_succin  
46446677\_Parachlamydia\_sp.  
53712322\_Bacteroides\_fragil  
48854326\_Cytophaga\_hutchi  
20094503\_Methanopyrus\_kandle  
14591657\_Pyrococcus\_horiko  
15607037\_Aquifex\_aeolic  
53796614\_Chloroflexus\_aurant  
26246990\_Escherichia\_coli  
29142267\_Salmonella\_enteri  
47573089\_Rubrivivax\_gelati  
48770381\_Ralstonia\_metall  
48786339\_Burkholderia\_fungor  
21674038\_Chlorobium\_tepidu  
15644445\_Thermotoga\_mariti  
39997720\_Geobacter\_sulfur  
46199218\_Thermus\_thermo  
48857855\_Clostridium\_thermo  
37523934\_Gloeobacter\_violac  
51894272\_Symbiobacterium\_therm

PFYRLVHAEADGLPGVVIDRFGEAAVIQPNAAWAEATTVVKNKTGVPVPMN  
PFYRLVHAEADGLPGVVIDRFGEACVIQPNAAWAEATVTKNASGVPVLMN  
NAYRLAFSESDLLSGLIIDRYGDAFVIQVRSYPMEIFVYERSDFLIEER  
NGARLIHSESEDELPLVIDSYANHLSQLINTAGMERSIIDKSEIILLQEE  
NAYRFVHGEADAIPLGTIDVYQDVFLQSSSTKSIDESIIFEKILISFFEN  
NTYRLVHGEADNLPLVIDVYARTAVMQAHSAGMHVNIYYKSETIA-QEY  
NVYRLLHAEAGDFPFIADVYADVVLQVLRGVEKHIYIKAKTIVIKEN  
DHMRVVFSEADVPGLILDKFNDAIVFQTTCPAERTLYEKNDSTVVEEY  
NVYRMVYGEADYPLGLIVDRFNDAISLQISSAGMERTVFEKNTGTIIQEG  
NAYRLVHSEGDLLPLVIDVYGSYLAVEFTTYGMNQIYIEKNEVI IWEH  
IACRLVFESESDGLPLVIDRYGCYLVLIQLLTQAMAVGIYERSDAITALDQ  
DSYRLIAGESDGLPGITIDRFGNFLVLQLLSAGA EYAIYDRSDVLP IEEH  
DSYRLIAGESDGLPGVTIDRFHFLVLQLLSAGA EYAIYDRSDVLP IEEH  
DAQRLVHGEADGLPLVIDRYGDTLSAQFLGAGVERRLYERSDALSTIREH  
NAVRLIFGESDRPLPLVIDYRQQLVCFQNAAGVEQNVYERSDALSTVTEH  
GAVRLIFGEADGLPLVIDHYRSQVLCQFMAAGVEANVYERSDVLIVSEN  
NAWRLVHGESDGLPLVIDRFDRAFVLQSFSAIDQAIIVRNESQEIERS  
TAFRVVHSEGDPLPLVIDLFGDYLVFQITTLGMEKGIYIEKSEGIEFEMN  
ETFRLVHGEADGLPLVIDKYGEWLSIQLLTAGMDAGIVARNVDLEIEEH  
GGYRLVHAEAGDLLPLVVDYAGHAVVQATAHAWEGSVLAKNDVAVQVREG  
ACCRLIHGEADHMPGLTVDRYGSLLSVQITCLGMELGIYERNDITEICEN  
KTFRWIHGEGADGLPLVIDRYGDFVQVLLALGLEPGIFERSDAIVEIEEG  
GACRVVFEADFLPLVIDKFGDILVQVTLALGIDKGIYERNDVITIVEN  
\* . : . \* : \* :

23509703\_Plasmodium\_falcip  
16080887\_Bacillus\_subtil  
29375834\_Enterococcus\_faecal  
54294134\_Legionella\_pneumo  
42571865\_Arabidopsis\_thalia  
CM2295\_Cyanidioschyzon\_merolae  
42522494\_Bdellovibrio\_bacter  
14600479\_Aeropyrum\_pernix  
42524664\_Bdellovibrio\_bacter  
39998234\_Geobacter\_sulfur  
34763641\_Fusobacterium\_nuclea  
6457710\_Deinococcus\_radiod  
32444786\_Rhodopirellula\_baltic  
21110809\_Xanthomonas\_axonop  
15837009\_Xylella\_fastid  
53797508\_Chloroflexus\_aurant  
22960169\_Rhodobacter\_sphaer  
56679104\_Silicibacter\_pomero  
15605998\_Aquifex\_aeolic  
34556476\_Wolinella\_succin  
46446677\_Parachlamydia\_sp.  
53712322\_Bacteroides\_fragil  
48854326\_Cytophaga\_hutchi  
20094503\_Methanopyrus\_kandle  
14591657\_Pyrococcus\_horiko  
15607037\_Aquifex\_aeolic  
53796614\_Chloroflexus\_aurant  
26246990\_Escherichia\_coli  
29142267\_Salmonella\_enteri  
47573089\_Rubrivivax\_gelati  
48770381\_Ralstonia\_metall  
48786339\_Burkholderia\_fungor  
21674038\_Chlorobium\_tepidu  
15644445\_Thermotoga\_mariti  
39997720\_Geobacter\_sulfur  
46199218\_Thermus\_thermo  
48857855\_Clostridium\_thermo  
37523934\_Gloeobacter\_violac  
51894272\_Symbiobacterium\_therm

GTFVFDILKGQKTGWYDQRYNRTMLISYCKNVLDLFSYVGSFGITLAY  
GQYAVDLNEGAMTGIFLDQRHVRKAIRDYKTVLNTFSYTGAFSVAALG  
GQFATYLNELMTGIFLDQKEVRGRVLDGFKTVLNMFSYTGAFSVAAMG  
GLYHVEFAQTKTGLFLDQRENHAKRIAKLSKRVLDLTYTGGFALHAAGA  
GSYASL-EGQKTGFYTDQRENRFISTISKRVLDLCCYSGGFALNAARG  
GMYEVDIMHGQKTGHYCDQRNRLFIRHLVQRVLDLCTYTGGFALNAVLG  
GLFASNIRDAAKTGFFLDQRNRMKMQHFAKTVNLNFSYTGGSIFAAKG  
QRFIVDVERGQKTGFFLDQRNRELELAVDSVLDVFSYTGGSIFHALLS  
GTMSCDLVEGQKTGFFLDQTHNKNWAKTQQIRVLDLCCYVGHWSTQITRG  
GTFVLELERTGLFLDQRANRRQLMARTKRVLNLFAYTGAFSVAAGA  
GKYNIDIVDQKTGFFLDQRDSRKFIAKYITRFLDVFSSSGGFSMAALKN  
GRFEAEVHREGQKTGFFLDQRENRRRVEGLSRVLDLFCYSGGFSLYAARG  
GEMAIIDLQDQKTGGYLDQQLNHAASYSYMRVLDICTYTGGFALAAARA  
GKFRADPAGAHKTGFFADQRNQRWLEQVKSVDLCCNTGGFAVYAAAR  
GKFLVDPMAHKTGFFADQRNQRWLSQGVKTVLDLCCNTGGFAVYAAAR  
GFFQVILYGGQKTGLFLDQRNRRRTLEGLVARVNLNCFAYTGGSFLYALRG  
GTYMADLTGGQKTGLFYDQRPNHAFARLGGSVLDVFTHVGGFALALAG  
GTYMADLTGGQKTGLFYDQRPNHAFARLATRVLDVFSHVGGFALAMLAG  
EKFLVDVVEGLKTGFYLDQRNREYVRNLVDRVLDLFCYSGGFSVYCANR  
GRFVINLEGGQKTGYLDQRNRRLLLAEMAKRVLDLFCYSGGFSYHALLK  
GKFTTNLHKSQKTGFFLDHREMROWIKTSLKVLNLFAYTGGSFVYAMAG  
GKFFHVDWLKGQKTGFFVDQRENRRLLERYARSVNLNMFYTGGSFVYAMR  
DLFEVDFIDGQKTGFFVDQRENRELLRSYKSKVNLNFCYTGGSFVYAAASG  
GRFVAVVEEGQKTGFYIDQVENRAKQVLELGRVLDVFTYVGGFVIAHAAG  
RKFIVDM-RGQKTGFFLDQRNRLALEKWVDRVLDVFTYTGGFVIAHAAIA  
DKYYINIPQGQKTGFFLDQRNARKFVRNLVDRCLDVFCHTGGFALNMKRA  
PRMFADLQTKGQKTGIYLDQAINHLRVGAYCADTLDCFSYAGGFALAAALA  
GKLLVDIQGHGKTGYLDQRDSRLATRRYVVRVNLNCFYTGGSFAVSAALMG  
GKLLVDIQGHGKTGYLDQRDSRLVTRRYVQRVNLNCFYTGGSFAVSAALMG  
GQLKVDVAEGHKTGYLDQRNRLRFMQLVRRVNLNCFYTGGSFVAAALAG  
GRYHVDVRNGHKTGFYVDQRNRRKLVGLDLAREVNLNCFYTGGSFLAALRG  
DRYHVDVRNGHKTGFYVDQRNRRPLVQQLARDMLNCFYTGGSFLAALRG  
GSYRVNILEGQKTGFFLDQRNRRHIRKYAADVLDVYTNDDGGFALNAMHA  
GKFLAD-TRGQKTGFFLDQRNARMVMDLAKVCLDVFSTGNFAVHLLKG  
GRFRVDMGGQKTGHFLDQKENHLLKGI SKRVLDLFCYSGSWGIIHAAAF  
RRYLVDLRAGQKTGAYLDQRNRLYMERF-ERALDVF SYAGGFALHLAL-  
GKYLVDVENGQKTGFFLDQKYNRAAVARIAKRVLDLFCYSGFGLNAAALG  
SRLLVDIQGGQKTGLFLDQRFNROHARFARNVNLNCFYTGGSFAVQCALA  
GEIADVVAEGQKTGYLDQRNRRHARRVRYAGRVLDLFCYSGGFSVYHAAAA  
\* : \* : \* :

23509703\_Plasmodium\_falcip  
16080887\_Bacillus\_subtil  
29375834\_Enterococcus\_faecal  
54294134\_Legionella\_pneumo  
42571865\_Arabidopsis\_thalia  
CM2295\_Cyanidioschyzon\_merolae  
42522494\_Bdellovibrio\_bacter

GAKEVTCVDSYSAIQNGLHAAQYNNVKTVDVILIDPPPLARNNYCLPSA  
GAEKTTSDVANRSLAKTIEQFSVNKLLRFDLIIIDPPSFARTKKRTFSA  
GAVATTSVDLAKRSLPKTTEQFEVNHLLSYDMIIDPPSFARNKKKVFVSV  
GALHVTAVDSSQAIEQAKNNAVLNHLGEYDVVILDPKLPKSKHLQQA  
GATSVIGDSSSLPALELARENVILNNMETWDIVLDPPKLVPRKVVHLNA  
GALHVTAVDSSQALMQAHRNAERNQVQRYDLVLDPPKLPKLVPRKVVHLNA  
GAKEVTSVDIAKVAIQAVARNFEINDLKKYDVIITDPPSFAPNEKSVEQA

14600479\_Aeropyrum\_pernix  
42524664\_Bdellovibrio\_bacter  
39998234\_Geobacter\_sulfur  
34763641\_Fusobacterium\_nuclea  
6457710\_Deinococcus\_radiod  
32444786\_Rhodopirellula\_baltic  
21110809\_Xanthomonas\_axonop  
15837009\_Xylella\_fastid  
53797508\_Chloroflexus\_aurant  
22960169\_Rhodobacter\_sphaer  
56679104\_Silicibacter\_pomero  
15605998\_Aquifex\_aeolic  
34556476\_Wolinella\_succin  
46446677\_Parachlamydia\_sp.  
53712322\_Bacteroides\_fragil  
48854326\_Cytophaga\_hutchi  
20094503\_Methanopyrus\_kandle  
14591657\_Pyrococcus\_horiko  
15607037\_Aquifex\_aeolic  
53796614\_Chloroflexus\_aurant  
26246990\_Escherichia\_coli  
29142267\_Salmonella\_enteri  
47573089\_Rubrivivax\_gelati  
48770381\_Ralstonia\_metall  
48786339\_Burkholderia\_fungor  
21674038\_Chlorobium\_tepidu  
15644445\_Thermotoga\_mariti  
39997720\_Geobacter\_sulfur  
46199218\_Thermus\_thermo  
48857855\_Clostridium\_thermo  
37523934\_Gloeobacter\_violac  
51894272\_Symbiobacterium\_therm

GASKAVFIEEDAHAVKLLRKNLRLNGIESFDIVTVDPFAFIPGQEAQKRG  
FEVEVSLADISKTALAFACKNAEREGATHYDIVIADPPAFIKSKKDIPIG  
GASRVTSVDASPTYTDWAKAHFEANRLERFDIVLMDPPSFTSRSRFTT  
GAKEVVMADKDSHALELCYENYKLNFKKFDITLDPPLIKKTEIYKG  
GASEVTSLDISAHALRSAERNFALNPEADYDLVILDPPLSLARREAREGA  
GAKEVVAVDSSERALDI AKRNAERNQLEQFDAILDPPRFAGSRNQTNNA  
GAAEVLGVDI DEVDVIAIAKGNAKLNNVEQFDVVLDPKAMTRDREQVIPA  
GAADVGVGDIQDVIQIAKANAKLNSVDQYDVVILDPKAMTRDRDQIINA  
HAAEVVSCDIGRGLAEATATNIALNLRLQTFDVFVILDPSPFARTRTSQHA  
GAERALAVDASGPALALAEAGAKLAGLARFDLVICDPPAFAPAKPALEAG  
GAGSALAVDGSAPALALAEQALASGLLETFDVFVILDPSPAFAPSKQALDAG  
GAK-VVGVGDIKRAVELARENAKLNVEEWDLIIADPPAIKTKKESKI  
GAKEALFIDSSEMACEQVKKLNSLNQLEKFDLIIIDPPSFAKTKQKQGA  
GAKRVDSVDISQEAQVACQKHFVNLNELLVDLVDLDPFAFAKQKQDVIAA  
GAKQVHVSVDSSAKAIDLTKNVELNFPDQYDLIIIDPPAFAKHDKALRNA  
GAEVVDVSDISKEAVALAGKNMELNYPDYDIIVLDPFAFAKSAKAVANA  
GAEVVGIDKDFRVVQAAAYRNADLNDVEEFDVVLDPFAFVTSKEHLNRG  
GADEVIGIDKSPRAIETAKENAKLNGVEKFDIVVLDPPAFVHEKDLKAG  
GAGEVIGVDISELALKEAEKNARLNGFEKFDVIIIDPPSAFNRAAVPNA  
GARQLTLVDASAEALGLAADNLRNLRLQFDVVLDPKPFVHQQAHLQRA  
GCSQVVSVDTSHEALDIARQNVELNLEKFDVIMDPPKPFVENKSQLMGA  
GCRQVVSVDTSQDALDIARQNVELNLEKFDVIMDPPKPFVENKSQLMGA  
GAQQVIVSVDSSGPALARASEHVQLNGFASFDIVLDPKPFAPATAHAERA  
GATSVTSDISSGEALKIAASNVTLNGFRQFDLIVLDPKPFAPSAQHIDRA  
GAKRVVSIDSSGDALIAQQNVAANGFERFDLVLDPKPFAPSRHVDRG  
GAKSTMVDSIQEALQRAEQNARTNGFHTFDLVLDPSPFTSRKTRVPTA  
GAKHVTLVDYSERALEVAREILKLNFRKYDVLVLDPPSAKSSNLESA  
GAAETLCLDVSEAAALVMANARLNGLRFRGVVLDPPAFVSKKALKEA  
GFREVVAVDSSAEALRRAEENARLNGLERFDLVLDPFAFAKGGKQDVERA  
GAEHVTCVDISQSAIDMAKANAVRNLHLDYDIIVLDPFAFTSRKTRVQSA  
GASSVLNVDIAEAATAIAEQNALQNGVRRFEMIIIDPPAFAKSRSVLEGA  
GAREVVAVDASAEIAAAEAENAARNGLERFDVIVLDPFAFARNAKALEGA

: : : \*\* :

23509703\_Plasmodium\_falcip  
16080887\_Bacillus\_subtil  
29375834\_Legionella\_pneumo  
54294134\_Legionella\_pneumo  
42571865\_Arabidopsis\_thalia  
CM2295\_Cyanidioschyzon\_merolae  
42522494\_Bdellovibrio\_bacter  
14600479\_Aeropyrum\_pernix  
42524664\_Bdellovibrio\_bacter  
39998234\_Geobacter\_sulfur  
34763641\_Fusobacterium\_nuclea  
6457710\_Deinococcus\_radiod  
32444786\_Rhodopirellula\_baltic  
21110809\_Xanthomonas\_axonop  
15837009\_Xylella\_fastid  
53797508\_Chloroflexus\_aurant  
22960169\_Rhodobacter\_sphaer  
56679104\_Silicibacter\_pomero  
15605998\_Aquifex\_aeolic  
34556476\_Wolinella\_succin  
46446677\_Parachlamydia\_sp.  
53712322\_Bacteroides\_fragil  
48854326\_Cytophaga\_hutchi  
20094503\_Methanopyrus\_kandle  
14591657\_Pyrococcus\_horiko  
15607037\_Aquifex\_aeolic  
53796614\_Chloroflexus\_aurant  
26246990\_Escherichia\_coli  
29142267\_Salmonella\_enteri  
47573089\_Rubrivivax\_gelati  
48770381\_Ralstonia\_metall  
48786339\_Burkholderia\_fungor  
21674038\_Chlorobium\_tepidu  
15644445\_Thermotoga\_mariti  
39997720\_Geobacter\_sulfur  
46199218\_Thermus\_thermo  
48857855\_Clostridium\_thermo  
37523934\_Gloeobacter\_violac  
51894272\_Symbiobacterium\_therm

LKIYEKLLVVSFRIIQKPGYVSVSSNRLIGYDKLLLCIKRALKWSKCEG  
AKDYKNLLKETIATADKGVIVASTNSSAFGMKFKGFIIDAAFKETNERY  
AKNYGVLVSDSIDILTDKGTLLASTNAANLSLAKYQKQMVITALEKKNVRY  
KNYRFLHREAFKYMKPGSLLMTCNCSSALSSQDFCSLSVAQAVAMGKQA  
SGMYRNLNSLAMRLTRSGGLMTCSCSGAMTQSKFLGILQSAAMSGRKI  
RHRYRKNMAAALRLVRSSGFLFTCTCSASMTQSQFSAVLMEALDAGRRI  
KAAATKVFVNSIKLVNPEGLFAASSCSHSITKFEFMDICQEAFSRARKKA  
FRAYKSSYLFALERAAGNSIVYLSSCSYFLSREFITLVTVEVASALEKEY  
KHAYLKMNTAHFRLVKKNGFVASCSCSGLLEEEEFDRAIRKASLRNYAEL  
RGGTSDLVAASLPLLAEGGLITSSNHQKQVDMADYKELRRLGALQAGSTV  
RDFFLDLCKDSFKLLENGGILGVITCAYHIGLQDLIEVTRMSASKNLL  
IRAYGKLAEGGLTRLAPGGILVSASCSAHVSAEFEAVMSAVRRSRRWR  
LRAYTRLNASAVDLLPPGGILVTCSCSGRVSRADFLNMLVDVGRKRGRDL  
LKKYLDMNKLALGVVKGGLFATFSCITGLVAEQEFLDMLRRASFSGRTI  
LKKYLDMNKLALGVVKGGLFATFSCITGLISEEQFLEMLRRAAFYSGRTI  
MRAYVRLNMLGLRCVTPGGLLVSASCTAQIGPEQFRSLLGEEAAQAHRL  
LRAYERLARLAAPLVAPGGYLVLCSCSHAADLSAFRNASARGIIGRGGRR  
LRAYERVARLAALVRPGGYLGLCSCSHAADLSRFREASVRGIGRAGRSV  
LWAIWKLAYYSFQKLLKGGSLFICSCITYQISSEEMIRQVRLASTDVKRR  
MNGWKYLLIGAIKVAAPKARIALYSCSYHMGLENAQVALEASRDSYTRL  
CRGYKDIRNLAMQKMPRRSLLTTCSCSHHVNELLFQKVVVQAAEAENRNV  
LQGYRKLNAKAFKIKPGGILFTFSCSQQVTKDNFRTAFTAVFTAAMSGRSV  
CRGYKQINLKAFRKIKKGGLLFTYSCSQNIDKDLFQKIVFGAAADSYRNV  
RRAYFDVNYKALGLVRDGGFLVTCSCSHFLEPSDFVRLVNEAAARRSVRL  
LRAYFNVNFAGLNLVKGGLVTCSCSQHVLDLQMFKDMI IAAGAKAGKGL  
LRGYKELCVRGLKIAKSGGYLAIFSCSFHITTEQHLLDVLLQASVDVRRQV  
TRGYKDIRNLQALHLIRGGILATFSCSGLVSADLFQKIFGAAVDAGRDRV  
CRGYKDIRNMLAIQLLEGGILLTFSCSGLMSTDLFQKI IADAAIDAGRDRV  
CRGYKDIRNMLAIQLLEGGILLTFSCSGLMSTDLFQKI IADAAIDAGRDRV  
SRAYKDIRNMLAIQLLEGGILLTFSCSGLMSTDLFQKI IADAAIDAGRDRV  
ARAYKEINLVGMQLLRPGGLLFTYSCSGAISMELFQKIVAGAAATDARSDA  
SRAYKDIRNLTGLKLLRPGGLLFTYSCSGAIDSELFQKIISSAAADARVDA  
LKAYTKLNLRLGLQVLRNEGYLATASCSSHVSEEDFLAAIHLGAMQAGKHL  
RRGYKEINLRAMRILKPKGVLVTSCTQIVSEELFREILFDASFDTKTSL  
EKGYLTVNRRGMELLEGGYLLITCSCSYHMGREPLRELLAQARQAGRHM  
YRAYKEVNLRLAKLLKEGGILATASCSSHMTPELPHYAMVAEEAAQDARHLL  
ARGYKEINLRAMKLLPRGGYLAATCSCSHFMTDDLFRKTLASAAKDAVSLS  
LRGYKEINLRAMKLLTPGGILVTCSCSSHLSMEMFRDVIIRDAADQTRTA  
ARGYKEINLRALRMLTEGGFLVTCSCSYHMTPDFLKAVVAAEAQDARRRL

```

23509703 Plasmodium_falcip      TIIGGRISSDHPIHISLPETKYLTSSILLM
16080887_Bacillus_subtil      TIIIEFTLPEDFKTISAFPEGNYLKVVLLQ
29375834 Enterococcus_faecal  KITDQTYQLPADFQVNPFPPEGNYLKVLFIE
54294134 Legionella_pneumo      RILGVYGPASCHPTLAAFPPEGNYLTAVLLA
42571865 Arabidopsis_thalia  TVVREAGAASDHPLDPSYPOGQYLSNLLLR
CM2295_Cyanidioschyzon_merolae TILAERGAALDHVVSPAAPTEGRYLTAMLLA
42522494 Bdellovibrio_bacter      TLVYIGGQPVDPHPYPLAMEELRYLKFALFR
14600479 Aeropyrum_pernix      RILGDRGASPDHVYRGE-EYLSYLKGAFIH
42524664 Bdellovibrio_bacter      RSVLRGGAADHPTLMQFPEGFYLMYVHY
39998234 Geobacter_sulfur      RVISLAGQPEDFPYPVTFPEGRYLKYVVS
34763641 Fusobacterium_nuclea  SVLGINYQPEDHPWILHIPETLYLKALWVK
6457710 Deinococcus_radiod  RKLSSRHAPDH--HASF AEAYLKAVFLQ
32444786 Rhodopirellula_baltic  IVLESRGPSPDHVFVAVSCPESDYLKCIVVQ
21110809 Xanthomonas_axonop  QILKVAGAGPDHPFMAHVQESRYLKAVFCR
15837009 Xylella_fastid      QILKVAGAGPDHPFMAHVQESRYLKATFCR
53797508 Chloroflexus_aurant  QIIEHAGHPLDHPVPAGFPEGRYLKYI IAR
22960169 Rhodobacter_sphaer  QLIHTGFAGPDHPILPQLAESGYLKSFFFR
56679104 Silicibacter_pomero  QLIHTGFAGPDHPQLPQLAESGYLKVFFFR
15605998 Aquifex_aeolic      I IKSLNLQPIDHPYLPFPESLYLKLHAI
34556476 Wolinella_succin  QILQYHLQDIDHPAILNMPHSLYLRGIVFE
46446677 Parachlamydia_sp.      RLIGRHQLACDHPINLHPESDYLKSFLLY
53712322 Bacteroides_fragil  RILHQLTQPADHPVNIYHPEGEYLGVLVLY
48854326 Cytophaga_hutchi      RI IHQMHPADHPINIYHPEGEYLGVLVLY
20094503 Methanopyrus_kandle  RMLGPRGQPPCHPIVPGNPDTRYLKA MFCA
14591657 Pyrococcus_horiko  KMLEPRTQAPDHPILMASKDTEYLKCLFLY
15607037 Aquifex_aeolic      RVIAKTFQDLDPWILQMPNTLYLKG VVVE
53796614 Chloroflexus_aurant  QILERLTQAPDHPVLLSFPEAYLKLGLICR
26246990 Escherichia_coli  QFIEQFRQAADHPVIATYPEGLYLKGFACR
29142267 Salmonella_enteri  QFIEQFRQAADHPVIATYPEGLYLKGFACR
47573089 Rubrivivax_gelati  YLLERLEAAPDHPTTVNFPEGEYLG LAIL
48770381 Ralstonia_metall  RILRRLSAGTDHPMSAAFPEGEYLG LLE
48786339 Burkholderia_fungor  RILKRLGAGMDHPLLTAFPEGEYLG LLLQ
21674038 Chlorobium_tepidu  RLISRAAQPPDHPVLLAMPETSYLKFACFY
15644445 Thermotoga_mariti  TVLRRGQPPDHPVLLMNPETQYLKFYILQ
39997720 Geobacter_sulfur  RVVGVRSQAPDHPVLLAVPETEYLKCFILQ
46199218 Thermus_thermo  RVVEKRQPPDHPVLLNHPETHYLKFAVFQ
48857855 Clostridium_thermo  RQIEARQQAPDHPILWNPETDYLKFYIFQ
37523934 Gloeobacter_violac  CLVEQRGQAPDHPILLHIPETEYLKYL LIS
51894272 Symbiobacterium_therm  RLVEERAQAVDHPIVVGYDESHYLKCLIYE

```

\* \* \*

**Note:** This gene has identifiable homologs only in prokaryotes and plastid-containing eukaryotes (red algae, green plants, and apicomplexan *Plasmodium*) in our GenBank and TBestDB searches (using *Cyanidioschyzon* and *Arabidopsis* sequences as queries). Homologs of the gene are rarely found in cyanobacteria. All top hits are from gamma and beta-proteobacteria.

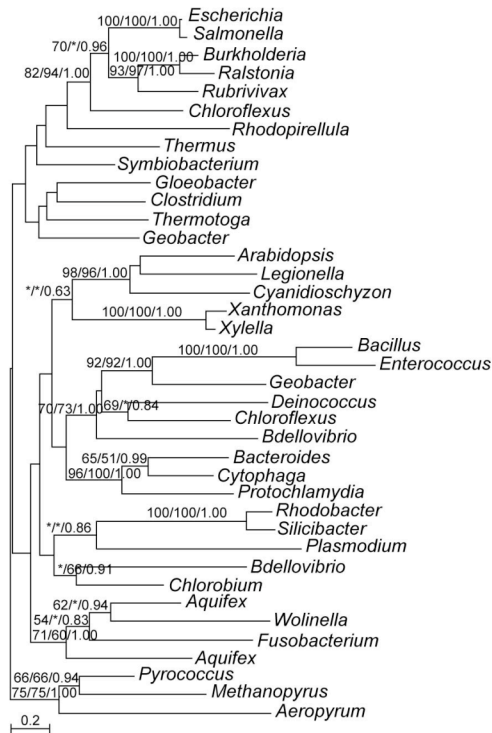

**Figure 14.** Molecular phylogeny of SAM-dependent methyltransferase. P-value = 0.921 from AU test for the presented gene tree. AU tests were also performed on alternative topologies including **(A)** monophyly of red algal, green plant and *Plasmodium* sequences, **(B)** monophyly of red algal, green plant, *Plasmodium* and cyanobacterial sequences, and **(C)** monophyly of red algal, green plant, *Plasmodium*, and archaeal sequences. Topology **A** investigates if red algal, green plant, and *Plasmodium* (which also has a relict plastid) sequences have the same origin. Topology **B** investigates if the three plastid-containing groups acquired the genes from plastids. Topology **C** investigates if these plastid-containing eukaryotic sequences have an archaeal or eukaryotic origin. P-value = 0.082 from AU test for topology **A** whereas p-values < 0.001 for topologies **B** and **C**.

## 15. Semialdehyde dehydrogenase (D)

CLUSTAL X (1.83.1) multiple sequence alignment

```

NUO00054019_Capsaspora_owczar          -----GTRKDRK-----
60466242_Dictyostelium_discoi          RVVLIGARGFTGGNLVRLIDGHPNSSTNFGKPIITTEFPQLKPPENIIDGW
32408531_Neurospora_crassa              RVALIGARGYTGQELIRLIDSHPNRELKAGKLEGYNKQEVSPEDVIDCW
5155_saccharomyces_cerevi              RVALIGARGYTGKLNLSLINGHPYSRELKGGKLDQYTKSEIQIDIVDFW
24214878_Leptospira_interr             EISILGAGGLTGKELLLFSRQKESDKLAGKTISEVFPVSVFVFKKHSV
21673935_Chlorobium_tepidu              TVSVIGASGYSGAELVKLLMKHPGAHTQAGKRFTELYPSIPTFQYTSVDV
27360910_Vibrio_vulnif                 KTTIIGASGYTGAEALMVEKHPENSTDAGKCISQLHGKLAVLPLTSDVI
53711823_Bacteroides_fragil            KAGIIGAGYTAGELIRLLINHPSTSNAGNKITDVHEGLYFTTDEIDVL
34558370_Wolinella_succin              PVGIVGVSGYTGLELLKMLLEHPYANTEGGVVRVVGALHSSLQSVKACELL
47529651_Bacillus_anthra                KVAIIGATGYGGIELIRLLEQHPYSFSQVGEKITNVYPHFQTLQEIIEIV
38233757_Corynebacterium_diph          KVAIVGASGYAGGELRLLQLHPLGSSVVGQTVSELMPHLPVVEPTHV
29610427_Streptomyces_avermi           RVAVAGASGYAGGELRLLLAHPENSNAGQKLGALQPHLLVLQETHDVV

```

41407459\_Mycobacterium\_avium  
15606911\_Aquifex\_aeolic  
32397402\_Rhodopirellula\_baltic  
11499653\_Archaeoglobus\_fulgid  
16331759\_Synechocystis\_sp.  
46135514\_Anabaena\_variab  
57168350\_Campylobacter\_coli  
15895656\_Clostridium\_acetob  
23473460\_Desulfovibrio\_desulf  
53796023\_Chloroflexus\_aurant  
4468762\_Thermotoga\_neapol  
22956652\_Rhodobacter\_sphaer  
CM2432\_Cyanidioschyzon\_merolae  
48765484\_Rhodospirillum\_rubrum  
50428699\_Oryza\_sativa  
19699208\_Arabidopsis\_thalia  
39997965\_Geobacter\_sulfur  
7379404\_Neisseria\_mening  
30249453\_Nitrosomonas\_europa  
53613186\_Azotobacter\_vinela  
15595859\_Pseudomonas\_aerugi  
24211481\_Deinococcus\_rediod  
55232034\_Haloarcula\_marism  
48853180\_Ferroplasma\_acidar  
18313659\_Pyrobaculum\_aeroph

RVAVAGASGYAGGIELRLLLGHPAAAAASAGSPLGEHHPHLLTVLEPTHDVV  
RVSVFGATGYTGIELLRSLTHPHSQSYKGGKVVRELVFFSEFLEE-ELA  
RVALVGTGTGTALEVARLLLTHPGSRQDEGKPLSEIHPMLATLQPLADVA  
KVGIIIGASGYTGSELLRILANHPESRRYEGQKIKWVHRFLKEFCSPCDLV  
RVGIIIGASGYGGIQLVRLLEHPPQGHSSAGKPYSDLYPHLTTIEPICDAV  
PVGIVGASGYGGVQLVRLMDHPEGESSVVGKSFASLYPHLASIEEVCEVV  
KVGILGASGYAGNELVRIILNHPKSSSSVQGSYTKLYPNTPNFEDKLDVL  
QAGIIGATGYAGEVLTWLLNHPNSHSHGNSNFSTYGNFTCIDNIDIL  
RAGLVGATGYTGEMELIRLLGHSSRAEAGKRLDDIYPFTQAITPCDIA  
RVGIYGATGYTGIELIKLLSRHPEARSAAQORLSEVFPILSRLTAVVDLV  
RVGIVGATGYTGIELFRLLKHPSSRTYAGKMMEVYPTLVLEDFCDVV  
NIAILGASGYTGAELVRLIATHPAGDRKAGMAMSEVFPFLRRLQKIVDLA  
AVAILGAGYTGSELVRLLRHPHTERTGRPRYQGVYPOYAPLCLTVDTV  
RIAIVLGSYTGAEIVRLLANHPQADRKAGEQFGSVFPHLINLVAVDVA  
RIGLLGASGYTGAEIVRLLANHPHADRKAGQSMESVFPHLRVLVSVDAV  
KVAVVGSYTGVELLRILHCHPESEQSGAKPVSDLPFLRVLLENLADII  
KVGIVGATGYTGVELLRLLAHPDSRSEAGTAVADYFPSLRAFQTPCDIV  
NAGIVGGTGYTGVELLRILVQHPKSRQEAGTGVDELFSLLRKFSDPCDVV  
KVGIVGATGYTGVELLRLLAHPQSRSEAGVKVADMPNLRRAFVSPCDVV  
KVGIVGGTGYTGVELLRLLAHPQSRSEAGVKVADMPNLRQFVSPCDVV  
TVAIVGSGYAGGELRLLALGHHPHSERSAKLPVSMVHPNLRKFRKAADII  
TASVVGSGGFTGGELLRLLDGHPESRSKENKTIGHSHPNLRRFSSPDVVL  
KVGIVGASGYVGGELMRLLRHPSTRHSGEKVSRIHPDLYKFEDIVDLI  
KVCIIIGASGFVGGELLRILLQHSGRRFKGEYVYRVHPNLRKFVPEADVV

NUO00054019\_Capsaspora\_owczar  
60466242\_Dictyostelium\_discoi  
32408531\_Neurospora\_crassa  
5155\_Saccharomyces\_cerevi  
24214878\_Leptospira\_interr  
21673935\_Chlorobium\_tepidu  
27360910\_Vibrio\_vulnif  
53711823\_Bacteroides\_fragil  
34558370\_Wolinella\_succin  
47529651\_Bacillus\_anthra  
38233757\_Corynebacterium\_dipt  
29610427\_Streptomyces\_avermi  
41407459\_Mycobacterium\_avium  
15606911\_Aquifex\_aeolic  
32397402\_Rhodopirellula\_baltic  
11499653\_Archaeoglobus\_fulgid  
16331759\_Synechocystis\_sp.  
46135514\_Anabaena\_variab  
57168350\_Campylobacter\_coli  
15895656\_Clostridium\_acetob  
23473460\_Desulfovibrio\_desulf  
53796023\_Chloroflexus\_aurant  
4468762\_Thermotoga\_neapol  
22956652\_Rhodobacter\_sphaer  
CM2432\_Cyanidioschyzon\_merolae  
48765484\_Rhodospirillum\_rubrum  
50428699\_Oryza\_sativa  
19699208\_Arabidopsis\_thalia  
39997965\_Geobacter\_sulfur  
7379404\_Neisseria\_mening  
30249453\_Nitrosomonas\_europa  
53613186\_Azotobacter\_vinela  
15595859\_Pseudomonas\_aerugi  
24211481\_Deinococcus\_rediod  
55232034\_Haloarcula\_marism  
48853180\_Ferroplasma\_acidar  
18313659\_Pyrobaculum\_aeroph

-----IVTVDLSGDNRFYGLPERFRERIASASFIISNPG  
FMALPDKISSPYIQTLEPVLVDLSSDHRFYGPETNRAAIKESKLIANPG  
VMALPNGVCKPFVEAVWSVIIDLSADYRFYGLPELQRSNIIQATQIANPG  
VMALPNKVCPEFVETIQSKIIDLSADHRFYGLPELDRAKIANAANKIANPG  
VLAVPNEVSVESAPKFLHKVIDLSGVYRLFGEIIFRDQLKNADFVSNPG  
LLALPHGALQVPGIIVKVIDLSGDFRLYGMPELFRDIAGSTAIISNPG  
FLATAHEVSHDLAPLFLCQVFDLSGAFRVYGLAEWNEEAIAKSQLVAVAG  
FFCTAHGDTKKFMESHNLKIIDLSMDYRIYGLPELNRRATCTAKHVANPG  
FLALPHQSAEFKAVLKKVVDLSADYRGLYGLIEWAREEIVQARLIANPG  
FLATPAGVSAEITPKLLKVIDLSGDFRMYGLSEWKREIQKANLIANPG  
FLALPHGFSAEIAQQLPITVIDCAADFRLYGIPEMHRDLIASSKRIAVPG  
FLALPHGQSAVAEQLGVLVDMGADFRLYGLPELGRAALEGSKRIAVPG  
FLALPHGHSAAALADQLGTLIVDCGADFRLYGLPELARERLRGARRIIVPG  
FLCLPHGVSEIYVPKLLKVVVDLSGAYRIYGLPEVFRREEIKNSDLVANPG  
MCCLPHGASAEVSKQLAMRVIDFSADFRLYGMPEFFADEIRSADIVANPG  
FTAVPHGEAMKYVQQLIKVVDISADYRGLYGLTELHREEIKKANLVANPG  
FLGLPGLACDMPALLCKVLDLSADYRFYGLPELYRDAIRDAQLIGCPG  
FLSMPNGLACQIVPTLLCKVLDLSADYRFYGLPELYRDAIRDAQLIGCPG  
FTATPHEFSAKLFSSELMKIIDLSADFRLYGLCELYQEEIKKANLIANPG  
FTALPSGKTFISVKKAVVVDLGDYRGLYGLSEIYREKIKTNSLIANPG  
FLAVPHGAEMEAQAHLKVVVDLSADFRLYGLPELYAEQTRNATLVANPG  
FTCLPHNTSIPITVQRALRVVDFSDTFRIYGLPELHREIRGARLVANTG  
FTALPAGVSYRLAMELQVKIIDLGADFRFYGLPELYRDSIKNARIVNPG  
FCALPHATSQAVIAGLPLKVVVDLSADFRLYGLTEFYRDEIRGARLVAGT  
FCCLPHATTQSIIVTSLIPRVIDLSADFRLYGLTEFARADIRGARLVANPG  
FCALPHGTTQTIIGDLLLLRIADLSADFRLYGLTEINRAAIATARLVAVPG  
FCCLPHGTTQEI IKGLPLKIVVDLSADFRLYGLTEVLREINRANLVANPG  
FCCLPHGTTQEI IKELPLKIVVDLSADFRLYGLTEILREDIKKARLVANPG  
FTALPHKAAMEVVPFTFLKRVVIDLSADYRFYGLPEVRRAAVKGAKLVANPG  
FFATPNGIAMKADAPRILVVIDLSADFRIYGLSELNREAVAQARLVANPG  
FFATPNGIAMQAKALLIKVIDLAADFRIYGLPEVNREKIRDARLIANPG  
FFATPHGVAHALAGELLTRVIDLSADFRLYGLPEVNREIRISARLIIVPG  
FFATPHGVAHALAGELLTRVIDLSADFRLYGLPEVNREKIRGARLIIVPG  
VLALPHNSAAKRITFEKVIDLSADFRLYGNPELHREDLRGATRIACAG  
FAATPHGVSMEQIDAFQGTVVVDLSADFRLYALPELNDRNLEGADLIASGG  
FLALPHGTSIKYVPLVVKIIDMSADFRLYGMPELHREIQIKNATYIATPG  
FLALPHGESVVKVPLVAVVFDLSADFRLYGLPELHRESELVGAQLVAVPG

\* . \*.. \* : .. \*

NUO00054019\_Capsaspora\_owczar  
60466242\_Dictyostelium\_discoi  
32408531\_Neurospora\_crassa  
5155\_Saccharomyces\_cerevi  
24214878\_Leptospira\_interr  
21673935\_Chlorobium\_tepidu  
27360910\_Vibrio\_vulnif

CYATGAQLSILPLAPAVFGISGYSAGTTPSEKNDVNYLKDNIIVPYSLVN  
CYATGMFLTLKPFVPSCFGISGYSAGSKPSEKNDPTRLSNIPYKLVQ  
CYATAAQLGISPLVPHVFGVSGYSAGTKPSKNDVENLNNIIPYSLTG  
CYATGSLTISPLTPTVFGVSGYSAGTKPSKNDPKFLNNLIIPYALSD  
CFSTSVILPILFLGIIIVDSKSGVSGAGRTEDSGYSYTSVYENFRAYKILS  
CYATSIIIGLAPLVNVTAVSGISGAGRSKALELSFSEMSGNMRAYKVGK  
CYTTAAQLAIKPLLPVINATSGVSGAGRKASMTNSFCVE--SLQPYGIFN



53711823\_Bacteroides\_fragil  
34558370\_Wolinella\_succin  
47529651\_Bacillus\_anthra  
38233757\_Corynebacterium\_dipht  
29610427\_Streptomyces\_avermi  
41407459\_Mycobacterium\_aviu  
15606911\_Aquifex\_aeolic  
32397402\_Rhodopirellula\_baltic  
11499653\_Archaeoglobus\_fulgid  
16331759\_Synechocystis\_sp.  
46135514\_Anabaena\_variab  
57168350\_Campylobacter\_coli  
15895656\_Clostridium\_acetob  
23473460\_Desulfovibrio\_desulf  
53796023\_Chloroflexus\_aurant  
4468762\_Thermotoga\_neapol  
22956652\_Rhodobacter\_sphaer  
CM2432\_Cyanidioschyzon\_merolae  
48765484\_Rhodospirillum\_rubrum  
50428699\_Oryza\_sativa  
19699208\_Arabidopsis\_thalia  
39997965\_Geobacter\_sulfur  
7379404\_Neisseria\_mening  
30249453\_Nitrosomonas\_europa  
53613186\_Azotobacter\_vinela  
15595859\_Pseudomonas\_aerugi  
24211481\_Deinococcus\_rediod  
55232034\_Haloarcula\_marism  
48853180\_Ferroplasma\_acidar  
18313659\_Pyrobaculum\_aeroph

CFATCIQLGLLPLAVMVNAITGSTGAGVKGATSHFSWRNNMSVYKAFE  
CYPTATLLGLILPFIIFVDAKSGVSGAGKKLTHNTHYPTINENLFAYSPLS  
CFATAALLAILPLVIIIDAKSGVSGAGKTPPTMTHTFPELYDNLRIVKNE  
CFPTGATLALLPAIVSVVITGVSGAGKKASVAMLGAETMGSCLKAYNVAG  
CYPTAVSLALFPAYAVIVAASGTSAGAKAAPHLLGSEVMGSMSPYGVGG  
CYPTAALLALLPAMVTVVAVSGTSGAGRAAKTDLGSEVIGSARAYNIAG  
CYPTATLLAIYFPLVIVHALSGVSGAGRKPQOFHFPENTENFFNYAVEK  
CYPTSAIMPLAPLVIIIVDSKSGVSGAGRSPKLGTLYCETNESISAYAVGT  
CYPTGTILAAASPLAVVDFCKSGITGAGESPSAFTHYPNLHESIVPYKITE  
CYPTASLLALSPLLAIVDAKSGTSGGGREAKVNMLLAEAEGLGAYGVAK  
SYPTASLLALSPLLAIVDAKSGTSGGGREAKTYLLLAEADNSLAPYSVVR  
CYTTCSILSLYPLFVIIIDAKSGVSGAGRSKVENLFCVENNIKAYGLAS  
CYPTASSLAILPLLIIIDAKSGVSGAGRKASTNNLFECDNSIFKAYGVAS  
CYPTSIVILGLYPLIVIDAKSGATGAGRKASVPSLFCVHDSFRAYGIGT  
CYPLTALPLVPLVIVVDSKSGVSGAGRSLKTHFGETHFTFSAYNVGR  
CYPTSIVILALTPALIVVDSKSGVSGAGRKETLDYTFSEVNLRPYVNAK  
CNAATGQYAIRPLIILIDLKAGVSGAGRSLKENLLHAEELSEGTHAYSAGG  
CYPTGAQLLALVPLVIVIDAKSGVTGAGRSKAEANLFCVTEGMHAYAVAN  
CYPTSAQLPLIPLLIIIDAKSGASGAGRDAKEGSLHCEVSEGIHAYGVGT  
CYPTSIQLPLVPLIIIDAKSGVSGAGRGAKEANLYTEIAEGIHAYGKIG  
CYPTTIQLPLVPLLIIIDAKSGVSGAGRGAKEANLYSEIAEGISSYGVTR  
CYPTSIVILGLQPLLIIISDSASGVSGAGRGAKEANLYCEVNEGFKAYGVGG  
CYPTCVSLPLVPLLLIADCKSGVSGAGRKGNVGSLCEVGNDFKAYGIAG  
CYPTAVQLGFIPILLIADTKSGVSGAGRKAETHLYAEASDNFKSYAVPG  
CYPTATQLGLFPLLLIADCKSGVSGAGRGAKEANLYSEIAEGISSYGVTR  
CYPTATQLGLFPLLLIADCKSGVSGAGRGAKEANLYSEIAEGISSYGVTR  
CFATSIVILALYPLLIIATGLVGSAAAGASASESSHHPERAGSLRVYKPVG  
CNATATILGLLPLFIVVDVKGVSSEGGAGGGEASSHPERSGVVRYAPTG  
CIASSIYSIAPFLINVDKAVGSSGSGSGLDESKVFSERFDSIRAYKPVN  
CMATASILMLAPLAPVIDAKIGSSGAGAEGSVVLDLHFSRTYVVRPYEPVH  
. . \* : .\*

NU000054019\_Capsaspora\_owczar  
60466242\_Dictyostelium\_discoi  
32408531\_Neurospora\_crassa  
5155\_Saccharomyces\_cerevi  
24214878\_Leptospira\_interr  
21673935\_Chlorobium\_tepidu  
27360910\_Vibrio\_vulnif  
53711823\_Bacteroides\_fragil  
34558370\_Wolinella\_succin  
47529651\_Bacillus\_anthra  
38233757\_Corynebacterium\_dipht  
29610427\_Streptomyces\_avermi  
41407459\_Mycobacterium\_aviu  
15606911\_Aquifex\_aeolic  
32397402\_Rhodopirellula\_baltic  
11499653\_Archaeoglobus\_fulgid  
16331759\_Synechocystis\_sp.  
46135514\_Anabaena\_variab  
57168350\_Campylobacter\_coli  
15895656\_Clostridium\_acetob  
23473460\_Desulfovibrio\_desulf  
53796023\_Chloroflexus\_aurant  
4468762\_Thermotoga\_neapol  
22956652\_Rhodobacter\_sphaer  
CM2432\_Cyanidioschyzon\_merolae  
48765484\_Rhodospirillum\_rubrum  
50428699\_Oryza\_sativa  
19699208\_Arabidopsis\_thalia  
39997965\_Geobacter\_sulfur  
7379404\_Neisseria\_mening  
30249453\_Nitrosomonas\_europa  
53613186\_Azotobacter\_vinela  
15595859\_Pseudomonas\_aerugi  
24211481\_Deinococcus\_rediod  
55232034\_Haloarcula\_marism  
48853180\_Ferroplasma\_acidar  
18313659\_Pyrobaculum\_aeroph

HLHEREVSRQVSGKVNFMHVAPFFQGITLTTDIRLVVQRFQDMFGKEPL  
HTHELEVSHQLGSPYFMPHVGFQGITLTTISMELVVERYQKFYQNEPL  
HIHEREVSSQLGAEIAFMPHVAVVFRGIIHTTISIPLIRQLYQDRYAGEKL  
HIHEREISARIGHNVAFMPHVGFQGITLTVSIPIRKLRNFYDEDEKL  
HQHPEIREYVDPEVIFTPHLLPVYRGILSTIVLEFLISILENSSLNEPF  
HQHTPEIMQTLTSFRFVFTPMIAPYVIRGIVSVLNVRLVRELYAGFYANAPP  
HRHQPEIVHHLGCDVIFTPHLLGNFKRGILATITMVKLVAAHAFQAYDRKPA  
HQHVPEIKQSLDAEIDFIPYRGDFPRGIFATLVVKTIVRMVEEYAKDSF  
HRHPEITAEEKIAKKVNFIPHLTPLTRGMLVSTFARLAMAILEKAYANEPF  
HQHIPEIEQMLTKPIFTSTHLIPISRGIMVTLYAKVLQOYEEAYEQSAF  
HRHTPEISQNLKIVVSTFVPLAPLPRGILTTATAKLIREIYLNAYENEPF  
HRHTPEMIQNLVSVSFTPTLAPMPRGILATCTAKAVRAAYEKAFADPEF  
HRHTPEIAQYLDVTVSFTPVLIPSTRGILATCTARTLRAAYEKAYANEPF  
HRHTPEMEDVIEVKVRFPTPTVPTSRGMISTVYLKSVKELFKEVYDEIF  
HRHAPETADLVPIEVMFTPHLTPMDRGILSTIYVPMMSLLRDTYSQPC  
HRHYEMVQELDIKISFTPQVYVPGSRGILTNHVFLLYRIYEEFYEDSFF  
HRHTPEIEQIAELRVQFTPHLIPMVRGILATVYATLLITIIYSAFYRASPF  
HRHTPEIEQICEVTVQFTPHLIPVIRGTLATVYATLLTIIYAFYRNSPW  
HRHTPEIEHKLITLQFTPHLVPMQRGILTTAYANLIREIQKYYQDRKF  
HRHTPEIEQLEVLKITLFTPHLVPMNRGILSVYCYNLVYDIYKFKYNEPF  
HRHTPEIEQELPLTVSFPNPHLLPVNRGILSTIYTTLVQAIYENAYADKPW  
HRHLAEMEQETGLHIFAPHLLPVFRGILSTIYVNLAAVYADAYAAEPF  
HRHVPEMEQELDVKVIFTPHLLVPMTRGILSTIYVKTIIHRIYQEFYAGEPF  
HRHLGDFDQEFVQVRFPTPHLTPMNRGILANVYVKGVHRALERTYLTFTF  
HRHAPETEQGLGVVNFPTPHLVPMARGILETIYVRCRACLQAYGEEKF  
HRHGPEIEQGLPVAVTFTPHLMPMNRGILSTIYLRALRQALSAAYADEAF  
HRHVPEIEQGLKVTISFTPNLICMKGQSTMFVEMLYOHLKSTYEGEFP  
HRHTPEIEQGLKVTISFTPHLMPMIRGQSTIYVEMLHQQLKSTYEDDEF  
HRHTPEMEQELRITITFTPHLAPMDRGILSTIYGRLLAGLYAEFYGGEPF  
HRHLPEIRQTAEGFVFTPHLAPMIRGMHATVYLHL---ILRDYRDSL  
HRHLPEIROGLPIGLTFVPHLTPMIRGIHATLYARLLQTLYENRYANEPF  
HRHLPEISQLEVLGTFVPHLTPMIRGIHATLYASVQLALYKRYASEPF  
HRHLPEISQGLDVGLTFVPHLTPMIRGIHATLYAHVLQALFEKRYADEPF  
HRHTAEAQQLLPLHLTAISTPRVIRGILTTIQAQVWVSAYREYVQGEFP  
HRHAEIEQQLGIDVSVTVHADMIRGASATCHVFPWLAGRYEYDEPF  
HRHTPEIEQELVKIALSAHSVNMVRGILTTSSIYSLWLLRKFYGNKFK  
HRHIAEIEQELRVKVAFTPHAVDMVRGIFATGHVFMWKMYSMYGDSKF  
\* \* \* . : \*

NU000054019\_Capsaspora\_owczar  
60466242\_Dictyostelium\_discoi

IEIVPVVKDQAQKHFVRLFAVDPATNRVVVATLDNLLKGAATQALQNI  
IKIDIPEVKSNSGKHTVTIFAVN--GNHLVVVTTLDNLLKGAATQALQNM

32408531\_Neurospora\_crassa  
5155\_Saccharomyces\_cerevi  
24214878\_Leptospira\_interr  
21673935\_Chlorobium\_tepidu  
27360910\_Vibrio\_vulnif  
53711823\_Bacteroides\_fragil  
34558370\_Wolinella\_succin  
47529651\_Bacillus\_anthra  
38233757\_Corynebacterium\_diphth  
29610427\_Streptomyces\_avermi  
41407459\_Mycobacterium\_avium  
15606911\_Aquifex\_aeolic  
32397402\_Rhodopirellula\_baltic  
11499653\_Archaeoglobus\_fulgid  
16331759\_Synechocystis\_sp.  
46135514\_Anabaena\_variab  
57168350\_Campylobacter\_coli  
15895656\_Clostridium\_acetob  
23473460\_Desulfovibrio\_desulf  
53796023\_Chloroflexus\_aurant  
4468762\_Thermotoga\_neapol  
22956652\_Rhodobacter\_sphaer  
CM2432\_Cyanidioschyzon\_merolae  
48765484\_Rhodospirillum\_rubrum  
50428699\_Oryza\_sativa  
19699208\_Arabidopsis\_thalia  
39997965\_Geobacter\_sulfur  
7379404\_Neisseria\_mening  
30249453\_Nitrosomonas\_europa  
53613186\_Azotobacter\_vinela  
15595859\_Pseudomonas\_aerugi  
24211481\_Deinococcus\_rediod  
55232034\_Haloarcula\_marism  
48853180\_Ferroplasma\_acidar  
18313659\_Pyrobaculum\_aeroph

VKVVAPSVKNIGGKHGVEIFEVDKSGRRVICATIDNLLKGAATQCLQNM  
VHVIIPLVKDIEGTHGVVIFKLNDAEDRVVVCATIDNLLKGAATQCLQNI  
IRIL-VELKKVQHTNFLDI-SLRKRENTLVVVSALDNLVKGAGQALQNI  
VRLRVTEVSHVAYTNFCDLAFES-DGSLVITAITDNLVKGAGQAVQNM  
VRLKIPRIQDVEFTPFCDLWRVQ--GQHIIIVISAIDNLLKGGASSQAMQCL  
VHIVNIDLKQVNTNKCLI-HLEKHGDKLLIISCIDNLLKGGASQAVHNM  
IRLRPVEIKAVAGTHFCDI-YAMSQGRDLWVNSAIDNLLRGASSQAIANA  
IRIRFPSPKEVRGSNYCDMIAYDERTGRVTIVSVIDNMMKGAAGQAIQNA  
VHILQPOQAVVGSNMCHIVDADDNSKLLVVTSAIDNLTGKTAGAAVQCM  
VHLLWPATASVYGSNAVQVVAADAAAQRIIAISAIDNLTGKTAGGALQSM  
IYMLPRTGAVIGSNAAHIVAVDEAAGVLVAIAAIDNLVKGTAGAAVQSM  
VKVVPPTKWLGTNYCFIPHYDERTGYVYIIISAIDNLGKGASLQAVQNA  
VHVVLPAATKYVAGTNHVQI-SVRPSGKRAVICAIIDNLTGKGASGAAVQNM  
VRIQ-VLSQVRGSNFCDI-SIHPGEDRVVVSVIDNLVKGGASQAVQNM  
VKILYPQTKWAGTNLICYIEVDPRTRGRVIVLSAIDNLVKGGASQAVQCL  
IKVCYPQTKWAAGSNLCYIIVEVDPRTRGRVIVMSAIDNLKGGAGQAIQCL  
IRLLFPQTRWVKSNNFADIFSIDERTNRIIVLGAIDNLKGGAGQAVQNM  
IRIILPETHRVRGSNYCDIIRIDKRTNKIIVLSAIDNLMKGAASQAVQNM  
VRVLLPALRNVRGTMCDMLVDPDRTHRLIIVSCIDNLCRGASGQALANA  
VHVLLPELRHVQHTNHVVIIYQVME-PGRAILVAVIDNLVKGGAGQAVQNM  
VHVLFPSTKWCYGSNHVFIQLEERTGTPILMSAIDNLVKGGASQAIQNM  
LEVLLPSTHNRVGSNYVHIVIGDRVPGCAMVVAVDNLCCKGSSQAIQNA  
VHVLVPPQTRYVRSNHVVMVFPDRLOGRAILVVAFDNIVKGGASQAVQNM  
VRVVSPTHVRVRSNFCVLIIVHADRVPGRVIVTCVEDNLVKGGASQAIQDM  
VKLLVPHTRHVVGSNYCFMVFEDRIPGRAIIISVIDNLVKGGASQAVQNL  
VKVLPRTHNRVGSNYCHMVFPDRIPGRAIIISVIDNLVKGGASQALQNL  
VRVLPSTAHVRSNFCDIVVDQRTGRVIVVSAIDNLVKGGASQAVQNM  
VDILTPESTRVRSNFCRIIQQAQSDVWVVLVIDNLVKGGAGQAVQNM  
VDVLPETRSVRSNFCRIVHRPQGGDVAIVLSVTDNLVKGGAGQAVQNM  
VDMVHPETRSVRSNFCRIVHRPQGGDLVVVLSVIDNLVKGGASQAVQNM  
VDMVHPETRSVRSNFCRIVHRPQGGDLVVVLSVIDNLVKGGASQALQNM  
IRIVYPPMLLDGTNFCDFEMDVTGRVVLMSAIDNLVKGTAGHAIQSL  
VELVYEPKSVAGTNRAEVFEVDLPGNKRLVVFSAIDNMMKGSAGQAVHAA  
IRLIYPPDKPTVIGSNFADIFAIDKYKRVVVSFSAIDNLKGGAGNVAQSM  
IRIVYPNVYVLSNFCDFELDQRLNRLVTFSAIDNLVRSAGQAVQAF  
: : : \*\* : \* : . :

NUO00054019\_Capsaspora\_owczar  
60466242\_Dictyostelium\_discoi  
32408531\_Neurospora\_crassa  
5155\_Saccharomyces\_cerevi  
24214878\_Leptospira\_interr  
21673935\_Chlorobium\_tepidu  
27360910\_Vibrio\_vulnif  
53711823\_Bacteroides\_fragil  
34558370\_Wolinella\_succin  
47529651\_Bacillus\_anthra  
38233757\_Corynebacterium\_diphth  
29610427\_Streptomyces\_avermi  
41407459\_Mycobacterium\_avium  
15606911\_Aquifex\_aeolic  
32397402\_Rhodopirellula\_baltic  
11499653\_Archaeoglobus\_fulgid  
16331759\_Synechocystis\_sp.  
46135514\_Anabaena\_variab  
57168350\_Campylobacter\_coli  
15895656\_Clostridium\_acetob  
23473460\_Desulfovibrio\_desulf  
53796023\_Chloroflexus\_aurant  
4468762\_Thermotoga\_neapol  
22956652\_Rhodobacter\_sphaer  
CM2432\_Cyanidioschyzon\_merolae  
48765484\_Rhodospirillum\_rubrum  
50428699\_Oryza\_sativa  
19699208\_Arabidopsis\_thalia  
39997965\_Geobacter\_sulfur  
7379404\_Neisseria\_mening  
30249453\_Nitrosomonas\_europa  
53613186\_Azotobacter\_vinela  
15595859\_Pseudomonas\_aerugi  
24211481\_Deinococcus\_rediod  
55232034\_Haloarcula\_marism  
48853180\_Ferroplasma\_acidar

NIALGLRELDGI  
NICLGLDELASI  
NLALGYAEYEGI  
NLAMGYGEYAGI  
NLMTGAKETLGL  
NLMLGFGETTAL  
NIHYGFSPLTAL  
NLMFNLEETVGL  
NLMLGLPEGAGL  
NIVAGLEETTGL  
NLSLGVSETSGL  
NIALGLPEELGL  
NLALGWPEQTGL  
NLMFGLAEDDGL  
NVMFGLPETAGL  
NLMMGFDETLGL  
NLMMGWEEESLGL  
NIMMGWDETLGL  
NLMFDFDEDEGL  
NIMYGLAEKTGI  
NLMLGLPVNTGL  
NLLLGFAETVGL  
NIMFDLKETEGL  
NLMLGLDEAAGL  
NVMMGIPHEHTAL  
NVMLGFPETLGL  
NLMMGLPENTGL  
NIMLGYPETTGL  
NIMCGLPEGLGL  
NIMFGLKETHGL  
NIMYGLPETTGI  
NILFGLDERLGL  
NILFGLDERLGL  
NVAQGWDERAGL  
NVALGIEETAGL  
NIMNGFNEYEGL

**Note:** This gene is found in green plants, red algae, fungi, *Capsaspora* and prokaryotes. All top hits in GenBank searches are from alpha-proteobacteria. Phylogenetic analyses also support an alpha-proteobacterial origin of the gene in red algae and green plants. Fungal and *Capsaspora* sequences are apparently different (with an about 500 aa N-terminal extension and many conserved residues shared between them) from red algal, green plant and prokaryotic sequences. The *Neurospora* sequence (GenBank accession number P54898) is experimentally determined to be a mitochondrial precursor. Red algal and green plant sequences share many conserved residues with alpha-proteobacterial homologs. The *Arabidopsis* sequences (GenBank accession numbers and TAIR loci NP\_565461, AT2G19940 and NP\_849993, AT2G19940 respectively) are annotated to be located in cytoplasm. Sequence of *Capsaspora* sequence was obtained from TBestDB.

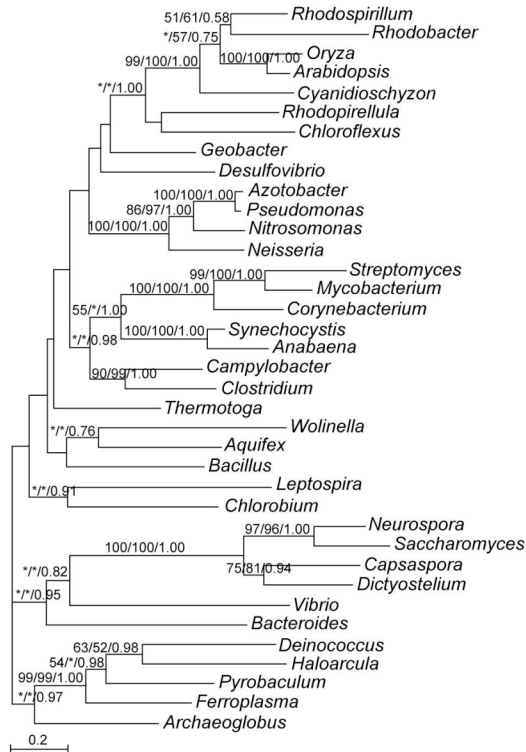

**Figure 15.** Molecular phylogeny of semialdehyde dehydrogenase. P-value = 0.981 from AU test for the presented tree. AU tests were also performed on alternative topologies including (A) monophyly of all eukaryotic sequences, and (B) monophyly of cyanobacterial, red algal, green plant, and alpha-proteobacterial sequences. Topology A investigates if all eukaryotic sequences have the same origin (mitochondrial or eukaryotic) whereas topology B investigates if red algae and green plants acquired this gene from plastids and further spread to alpha-proteobacteria. P-value = 0.045 from AU test for topology A and p-value < 0.001 for topology B.

## 16. Dihydrodipicolinate reductase (dapB) (D)

CLUSTAL X (1.83.1) multiple sequence alignment

```

116055387_Ostreococcus_tauri] TPVMVCGVGGKMGGRATASAVVRRDGFELIPTALDGEAVLKKAMIVVDYTL
18406430_Arabidopsis_thalia ISIMVNGCSGKMGKAVIKAA--DSAGVNI VPI SFEREKVLSSVFIVVDYTI
42572737_Arabidopsis_thalia ISIMVNGCSGKMGKAVIKAA--DSAGVNI VPT SFEREKVLSSVFIVVDYTI
CM2591_Cyanidioschyzon_merolae LALVSNGLPGRMALEVAQAALRRG-LELVPPFSLERAQLATKLKICVDFTQ
ISO00167059_Isochrysis_galbana TRVSLYD--PNARDALAQVVRETYPV-----DGEAIL----ICVDYTH
121542607_Candidatus_Desulf IPIMINGLPGNVAKMIVSHVLRDSRFALVPPFSLVRAARIGDIKISVDYTH
123966140_Prochlorococcus_mari IPVLVSGALGKMGREVNSVLNASDCELVAIDIDLEGLTCSISVLVDFTH
73748738_Dehalococcoides_sp. IKVVVHGASGKMGQEVKLTLCQENNFHPVGV DIDLSSILSQTKVMVDFTV
123216321_Mycobacterium_tuberc MRVGVVLGAKGKVGATMVRVAADADDLTL SALLDADPLSLLTDGNVVIDFTH
145593931_Salinispora_tropic LRVGVLGARGRMGIEVCKAVDAAPDMLVAVDQDWLFNASDGMVVDFTT
121535277_Thermosinus_carbox IRVMVCGAYGKMGREVLKAVHRDEQLSIVGVDIDLQTVINETKGVVDFTN
29376120_Enterococcus_faecal IKIIVAGFKGRMGSTATQMVLETTADFE LVGYDPRLEEVLA-VKVVVIDFTV
116873342_Listeria_welshi MKVAVSGFKGRMGHEVVKTVLREEDLEL VALDHNLSSEMLEEAKCVVDFTT
125973685_Clostridium_thermo IRVCLVGL-GKTGKEIAKVILEQENMKLVSVCSNLEQVIFKTKVVVDFST
20094858_Methanopyrus_kandle IGVVVLGATGRMGRICRMVIEDEELELVGIASALPNIAKDADVAIDFTV
118070755_Shewanella_woodyi VRVAITGGSGRMGRITL EAARQQPMIYLGAIERSL DLAVDDFDVLIDFTS
89899565_Rhodoferax_ferrir HRVAIAGASGRMGOMLIEA IKSAPDCELTGLD VDLAVGLKQARTLIDFTR
120613186_Acidovorax_avenae IRVAVAGASGRMGRMLEALRSSELVLAGLDV DLHGLAGCDVLIDFTR
20093259_Methanosarcina_acetiv INAAVLGACGRMGSLIENITCSTDMQLVAFD IDLETVLKKTOVLIDFTA
116754136_Methanosaeta_thermo TDVALTGAKGRMGSLI IDEIRSPD LKLV AIDIDVQRVLRRESRVLIDFTV

```

:\*::

```

116055387_Ostreococcus_tauri] PESVNANGELYVKCGVPFVMGTTG---GDRDALLREVKASGNVIAPQMGK
18406430_Arabidopsis_thalia PSAVNNDNAELYSKVGVPFVMGTTG---GDRNKLYETVEEAKI VISPQMGK
42572737_Arabidopsis_thalia PSAVNNDNAELYSKVGVPFVMGTTG---GDRTRLYKTVEESKIVISPQMGK
CM2591_Cyanidioschyzon_merolae PQAVIPNAAWYVENGDFVFMGTTG---GDT SALLYQMVARSARVIAPNMAK
ISO00167059_Isochrysis_galbana PSAVNGNAEWYAANKFPFVMGTTG---GDRESLLDAVTVGTVS VIAPNMAK
121542607_Candidatus_Desulf PTAVNGNCFEYCAHGLPFVMGTTG---GDRDRLDPAVRASSI VIAPNMAK
123966140_Prochlorococcus_mari PDSVFENTRSIAIAYGISPIIGTGLSPSQINDLSIFAQKAEVAIIPNFSV
73748738_Dehalococcoides_sp. AKASMPAIRIAAAHKVNLVIGTTGFSPEEISEIEQLAKTNDIILAPNFAL
123216321_Mycobacterium_tuberc PDVVMGNLEFLIDNGIHAVVGTGTFTEARFQQVESLVAKPNTLIAPNFAI
145593931_Salinispora_tropic PDAVMDNLHWICIDQGISAVVGTGTFTEARLERMRGLARKPGVVVAPNFGI
121535277_Thermosinus_carbox PDTVMNINRIAIKNGVCPVVGTGTLSEADVSEVRELCQSRVVIISPNSV
29376120_Enterococcus_faecal PEAAYPNTRFALEHGMAPVVGTGTFTEEQINELTNLSREKAILIAPNFAI
116873342_Listeria_welshi PKVGYSNTKTILEHGVRVAVVGTGTFTEPEQIESLREIAETKKILLIAPNFAV
125973685_Clostridium_thermo PDATIRNAKIFSKMKVNI VVGTGTFDFALKKLFVLTRKYHNCYAPNITL
20094858_Methanopyrus_kandle REATLENAPKAARAGLDLVI GTGTFSDLDLRVLEHEIEEAGVVIISPNSL
118070755_Shewanella_woodyi PEASLVHTDWCAKHGKAI VIGTTFGNHSQKEQISAYAEKTPVVMAPNMAV
89899565_Rhodoferax_ferrir PEGTLAHLAVRMCRELGNV VVIGTTFGSDAQKAEIATAATRDIAI VMAPNMSV
120613186_Acidovorax_avenae PEGTLAHLAVCAERGVKAV IGTGTFTEAQKAEIEAFAQRTAVVMAPNMSV
20093259_Methanosarcina_acetiv AGATIVNAPIAAGCGVNL IIGTGLTPEQRKVIDETIQKNKVVISPNSV
116754136_Methanosaeta_thermo PSAALENIHAAADTGVALV VGTGTFSEEQLSIEEMI KSAGIVISPNSFL

```

:\*\*\*\* : \*

```

116055387_Ostreococcus_tauri] QVVFQAAMKLMAEQFPGLTVTESHQSSK KDT-SGTAKAIVASFND-LGC
18406430_Arabidopsis_thalia QVVFALAAMEI MAEQFPGLDVMESHQASKLDA-SGTAKAVISCFQE-LGV
42572737_Arabidopsis_thalia QVVFALAAMEIMSEQFPGLEVMESHQASKLDA-SGTAKAVISCFQK-LGV
CM2591_Cyanidioschyzon_merolae QIVAFQALVELLGREFPNLEIESHQASKLDT-SGTAKAVVASMLOQSWG I
ISO00167059_Isochrysis_galbana Q-----
121542607_Candidatus_Desulf QVVGFQAMLAHAADTFPGMTVRESHQK GKADT-SGTARAVVHFSNR---L
123966140_Prochlorococcus_mari GMVLLQQAASVAAKFYDNI ELIEMHNNQKADSPSGTCIKTAEMIEEYPKQ
73748738_Dehalococcoides_sp. GAIIMVHLAQVARSFRLSSAEVIELHHDK KLDSPSGTALVTVASMLEARGE
123216321_Mycobacterium_tuberc GAVLSMHFAKQAARFFDSAEVIELHHPHKADAPSGTAARTAKLIAEARKG
145593931_Salinispora_tropic GAVLMMQFAERAASHFESA EIEIQHHPRKL DAPSGTATHARTLIIAARAA
121535277_Thermosinus_carbox GAVLMMQLAQEA AKYFPHVEI IELHHDQKLDAPSGTALRTAELIMQNRGS
29376120_Enterococcus_faecal GAVLMMQFAQKAAQYFPDVEI IELHHDNKLDAPSGTAIKTAEMI QEV RPA
116873342_Listeria_welshi GAVLMMQFAQKAAKYFPNVEI IELHHDNKLDAPSGTAVKTAEMMAENRTF
125973685_Clostridium_thermo GVNVLMLLTNLAASILN NFQITEIHHRKRVDPVSGTAIKIAGEIKKGLDS
20094858_Methanopyrus_kandle GVNLLFELTRQLARVLGD FEIVEIHHRHKVDAPSGTALELAAIEEELGK
118070755_Shewanella_woodyi GVNLLWKLLEVAEVMGDI EIEIGHHRKVDAPSGTALKMGEVIAETFLGR
89899565_Rhodoferax_ferrir GVNVTLLKLEMAAKALATIEIEIAHHRHKVDAPSGTALKMGEVVAGALGR
120613186_Acidovorax_avenae GVNVTFLKLEMAARALSTIEIEIAHHRHKVDAPSGTALKMGEVIAQALGR
20093259_Methanosarcina_acetiv GVNVFVKIVREAAKYLSDIEIEIAHNNQKVDAPSGTALRAADVISEALGG
116754136_Methanosaeta_thermo GVNVFVKLVEAARSLSDVEVIEAHHRK KVDAPSGTAMRTVEILSRSLGI

```

```

116055387_Ostreococcus_tauri] DFDVSIQIELGVPEEHL LGHAFHTYR-LTSADGTVSFEFQHNVCGRSIYAE
18406430_Arabidopsis_thalia SYDMDQIQLVGPEEHS GHAFHLYH-LTSPDET VSF EFQHNVCGRSIYAE
42572737_Arabidopsis_thalia SYDMDQIQLVGPEEHS GHAFHLYH-LTSPDKTVSFEFQHNVCGRSIYAE

```

|                                |                                                        |
|--------------------------------|--------------------------------------------------------|
| CM2591_Cyanidioschyzon_merolae | TGFGGEQDIGVPESCLQGHAFHTYR-LTSPDGSVRFVFOHNVCGRRVYAE     |
| ISO00167059_Isochrysis_galbana | -----                                                  |
| 121542607_Candidatus_Desulf    | GVHFSEDDQIGIPPEEHLGGHGWHTYT-LTSPDRTVTFEFKHNINGRDIYAD   |
| 123966140_Prochlorococcus_mari | YNEGLVKETGLNIHSIRLPGLLAHQVMMGSPGETYTRHDTIDRKAYMP       |
| 73748738_Dehalococcoides_sp.   | AFNKPPKENGIRVHSVRLPGLLAHQEVIFGAAGQTLTIRHDAFSRECYMP     |
| 123216321_Mycobacterium_tuberc | LPPNPDATSGIPVHAVRLAGLVAHQEVLFVFGTEGETLTIRHDSLDRTSFVP   |
| 145593931_Salinispora_tropic   | AGQGPAPDAGVRVHSVRATGLVAHQEVLFVFGATGETLTIRHDSYDRASFMP   |
| 121535277_Thermosinus_carbox   | MQQGHPAEVLGIRIHSVRLPGYVAHQEVIFGGLGQTLTIRHDSISRESFMP    |
| 29376120_Enterococcus_faecal   | KKQGNPQEVGLRIHSVRLPGLVAHQEVVQVFGSVGEGLTIRHDSYDRRSFMT   |
| 116873342_Listeria_welshi      | VKQGAEDEVMRIHSVRLPGLVAHQEVIFGAEGQGLTIRHDSYDRISFMS      |
| 125973685_Clostridium_thermo   | AGVSIKEKV-IPINAVRAGGVVGRHEVMIVGEDDKIEISHESFRRRAFAL     |
| 20094858_Methanopyrus_kandle   | GEKVFGRGEIGVLAVRGGEVVDHDTVMALGEYERIELTHRALSRDAFAK      |
| 118070755_Shewanella_woodyi    | DLDKCAVYGTIGFSTIRAGDIVGEHTALFADIGERIEITHKASSRMTFAN     |
| 89899565_Rhodoferrax_ferrir    | DLKCAVYGTIGFAAVRGGDIVGDHTVLFAGTGERIEISHKSSSRATYAO      |
| 120613186_Acidovorax_avenae    | KEYVCGREG-IGIHAVRGGDITGDHTVLFVGNSERIEIRHMAHSRQIFAK     |
| 20093259_Methanosarcina_acetiv | EDVRHGRREG-IGVHAVRAGDIVGDHTVLFVAGPGERIEIKHQAHRSRSAFEAR |
| 116754136_Methanosaeta_thermo  |                                                        |
|                                |                                                        |
| 116055387_Ostreococcus_tauri]  | GTVDVAVGFLKRKRTLYDMIDVL                                |
| 18406430_Arabidopsis_thalia    | GTVDVAVLFLAKQRIYNMIDVL                                 |
| 42572737_Arabidopsis_thalia    | GTVDVAVLFLAKKRIYNMIDVL                                 |
| CM2591_Cyanidioschyzon_merolae | GTIDAVCFLDRQKIYDMIDVL                                  |
| ISO00167059_Isochrysis_galbana | -----                                                  |
| 121542607_Candidatus_Desulf    | GTLDAVVFLHQGTVFSMIDVL                                  |
| 123966140_Prochlorococcus_mari | GVLQAIRKIGKSLIYGLEKLI                                  |
| 73748738_Dehalococcoides_sp.   | GVLLAIKEIVHGFVFGLDKLL                                  |
| 123216321_Mycobacterium_tuberc | GVLLAVRRIAEGTLVGLPELL                                  |
| 145593931_Salinispora_tropic   | GVLLAVRKVRTGLTVGLDALL                                  |
| 121535277_Thermosinus_carbox   | GVLLACKRVLTGLVYGLLENIM                                 |
| 29376120_Enterococcus_faecal   | GVALACRQVVQELLYGLEQML                                  |
| 116873342_Listeria_welshi      | GVALSIRKTKETLIYGLLENIL                                 |
| 125973685_Clostridium_thermo   | GAIKAEFIHVDVGYEYMSDVL                                  |
| 20094858_Methanopyrus_kandle   | GALVAAKFVVEPGIYSMRDVL                                  |
| 118070755_Shewanella_woodyi    | GAMRAASWLVEAGLYDMQQVL                                  |
| 89899565_Rhodoferrax_ferrir    | GSLRALRFLSQAGLYDMADVL                                  |
| 120613186_Acidovorax_avenae    | GSLRAARFLAATGLFDMFDVL                                  |
| 20093259_Methanosarcina_acetiv | GAVRAAEWICKPGIYSMDVL                                   |
| 116754136_Methanosaeta_thermo  | GALRAARWVVKPGIHSMEEVL                                  |

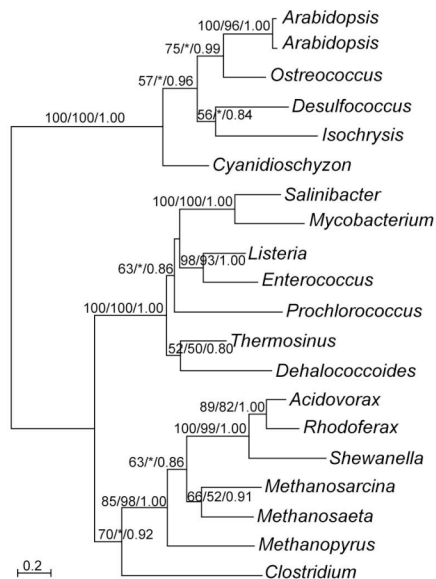

**Figure 16.** Molecular phylogeny of dihydrodipicolinate reductase (dapB). P-value = 0.995 from AU test for the presented tree. AU test was also performed on an alternative topology that enforces a monophyly of

*Desulfococcus*, cyanobacterial (i.e., *Prochlorococcus* since this gene is very rarely identified in cyanobacteria in our similarity searches), and photosynthetic eukaryotic sequences. P-value < 0.001 from AU test for the alternative topology. See text for more detailed explanation.

## 17. Leucyl-tRNA synthetase (D)

CLUSTAL X (1.83.1) multiple sequence alignment

```

60463472_Dictyostelium_discoi      FYLSLQFPYPSGA-LHMGHVRVYITISDCIARLKRMOQGYDVHHPMGWDAFG
19683964_Homo_sapien              FYVLSMFPYPSGK-LHMGHVRVYITISDTIARFQKMRGMQVILNPMGWDAFG
89306112_Tetrahymena_thermoph     YYVLSQFPYPSGN-LHMGHARVYIISDVISRFEKMKGNVINPMGWDAFG
15791045_Halobacterium_sp.        -YVLFAMFPYTSQG-LHMGHVRNYAITDAFARYRRMDGEDVLHPMGWDSFG
11595633_Neurospora_crassa        -YVLPMPFPYPSGH-LHLGHLRVYTIADVIARFQTLQGHKVLHPMGWDAFG
53715865_Bacteroides_fragil      FYVLNMFYPSGAGLHVGHPLGYIASDIYARYKRLQGFNVLNPMGYDAYG
15826893_Mycobacterium_leprae     LFVQDMFPYPSGDGLHVGHPLGYIATDVYARYFRMTGHNVLHAMGFDAFG
106884629_Clostridium_phytofer    YVLDLDFYPSGVLHAGHPEGYTATDIVSRMKRMQGYNVLHPMGYDSFG
76788931_Chlamydia_trachoma       YYVLDLDFYPSGAGLHVGHPLGYIATDIVARYKRAQGFVSLHPMGWDSFG
33235997_Chlamydia_pneumo        YYVLDLDFYPSGAGLHVGHPLGYIATDIVARYKRARGFVSLHPMGWDSFG
46446681_Parachlamydia_sp.       YYVLDLDFYPSGAGLHVGVGYTATDIARYMRTKGYNVMHHPMGWDSFG
PLO00010890_Pavlova_lutheri      -----
21674468_Chlorobium_tepidu       YYVLDLDFYPSGSLHVGHLEGYTATDIMARYKRCQGHNVLHPMGWDAFG
42527840_Treponema_dentic        LYILDMFPYPSGDGLHVGHPEGYTATDIYSRFLRMSGYNVLHPMGFDSFG
CM3072_Cyanidioschyzon_merolae    YYILDMFPYPSGAGLHVGHPEGYTATDILARYKMRGYNVLPMPGWDAFG
87311335_Blastopirellula_marin    MYVLDLDFYPSGDGLHVGHPEGYTATDIVCRYARMQKGSVSLHPMGFDAFG
83816700_Salinibacter_ruber      FYVLDLDFYPSGSLHVGHPEGYTATDIVARYKRKQGFNVLHPMGWDAFG
150385918_Victivallis_vadensis    YYVLDLDFYPSGAGLHVGHPEGYTATDIICRYRRMKGDNVLHPMGWDAFG
10175904_Bacillus_halodu         FYALDMFPYPSGAGLHVGHPEGYTATDILSRMKRMQGYNVLHPMGWDAFG
116058126_Ostreococcus_tauri     FYALDMFPYPSGAGLHVGHPEGYTATDIVARYKRMTGHNVLHPMGWDAFG
7267192_Arabidopsis_thalia       FYVLDLDFYPSGAGLHVGHPLGYTATDILARLRMQGYNVLHPMGWDAFG
2314727_Helicobacter_pylori      KYILSMLPYPSGE-IHMGHVRNYITIGDALARYRLHHYNVLHPMGFDSFG
6459971_Deinococcus_radiod       FYALTMFPYPSGN-LHIGHWYANVAPDARARWLRMRGYNVLPMAFDAFG
83367833_Rhodobacter_sphaeroi    YYVLEMFYPSGR-IHMGHVRNYTMGDVVARQKAAAGYVSLHPMGWDAFG
48766678_Rhodospirillum_rubrum   YYVLEMFYPSGR-IHMGHVRNYTLGDVVARFQKRAQGFNVLHPMGWDAFG
15889997_Agrobacterium_tumefa     YYVLEMFYPSGR-IHMGHVRNYAMGDVVARYKRARGFNVLHPMGWDAFG
19712730_Fusobacterium_nuclea    YYVLSMLPYPSGK-LHVGHARNYITIGDVISRYKRMKGYNVLPMPGWDSFG
106888735_Roseiflexus_sp         RYILEMFYPSGD-LHIGHLKNYVIGDALTRYVYVIRGYDVLHPPGWDAFG
46130187_Synechococcus_elonga     FYALSMPYPSGN-LHMGHVRNYITITDAIARVRRQGFVSLHPMGWDAFG
53763953_Anabaena_variab         FYALSMPYPSGS-LHMGHVRNYITITDVIARLKRMOGYRVLHPMGWDAFG
23129999_Nostoc_puncti          FYALSMPYPSGS-LHMGHVRNYITITDVIARFQKMGYRVLHPMGWDAFG
16128625_Escherichia_coli        YYCLSMLPYPSGR-LHMGHVRNYITIGDVIARYQRMLGKNVLPMPGWDAFG
30249126_Nitrosomonas_europa      YYCLSMPYPSGK-LHMGHVRNYITIGDVLRSYRRMQGYNVMPMGWDAFG
53762629_Ralstonia_eutrop        FYACSMPLPYPSGK-LHMGHVRNYITINDVMARYLRMNGNVLHPMGWDAFG
126358263_Pseudomonas_putida     YYCLSMPYPSGK-LHMGHVRNYITIGDVIARYQRMLGKNVLPMPGWDAFG
7227154_Neisseria_mening        YYCLSMPYPSGK-LHMGHVRNYITIGDVLRSFKLLNGFNVMPMGWDAFG
15642942_Thermotoga_mariti       YYALVMFPYPSGT-LHVGHVKNYVIGDVIARYKMRGYNVLPMPGWDAFG
48846878_Geobacter_metall        YYLLEMFYPSGR-IHMGHVRNYSIGDVVGRFKRLRGNVLPMPGWDAFG

```

```

60463472_Dictyostelium_discoi      LPAENAAIDKQVSPSEWTNLSMRDQLKLLNFQFDWDRELSTCNKEYY
19683964_Homo_sapien              LPAENAAVERNLHPQSWTQSNIKHMRQLDRLGLCFSDREITTCCLPDYY
89306112_Tetrahymena_thermoph     LPAENAAIQR-----NIVILQI-----QKLFCTREDYY
15791045_Halobacterium_sp.        LPAENANERDTPREWTERCIDQMRDQFEALGFQYDWEREITTCDDPDYY
11595633_Neurospora_crassa        LPAENAAIERGINPATWTKANIAKMKELQGHMNGSDWNCLELATCDPDFY
53715865_Bacteroides_fragil      LPAEQYAIQTGQHPAITTVNNINRYREQLDKIGFSFDWREIRTCDEPEY
15826893_Mycobacterium_leprae     LPAEQYAMQGTGTHPRILTEANVVNFRHLQGLRGLGHDSRRTFSTTDVEFY
106884629_Clostridium_phytofer    LPAEQYAVSTGNHPNGFTEKNIESFSKQLKELGFDYDWSKMIATSDPKFY
76788931_Chlamydia_trachoma       LPAEQYAIRTGTHPRETEKNIANFKKQLSAMGFSYDEGREFATSDDPDYY
33235997_Chlamydia_pneumo        LPAEQYAIRTGTHPKVTTQKNIANFKKQLSAMGFSYDEGREFATSDDPDYY
46446681_Parachlamydia_sp.       LPAEQYAIRTGTHPAESTQENINNYRRQLRALGFSYDWNRELATSDDPDYY
PLO00010890_Pavlova_lutheri      -----
21674468_Chlorobium_tepidu       LPAEQFAIKTGTHPRILTTEKNVASFRETLKSMGFSYDWSREINTTDPNYF
42527840_Treponema_dentic        LPAENYAIKGTGIHPLITTRKNMETFRKQIKSIGLSYDWDREISTSESY
CM3072_Cyanidioschyzon_merolae    LPAEQFALDTGIHPAVATERNITRFRKQLKSLGFSYDWDREINTTSPYY
87311335_Blastopirellula_marin    LPAEEHAIKGTGTPRVQTEKNIANFTRQLKMLGFSYDWERQIATTDIEY
83816700_Salinibacter_ruber      LPAEQYALKTNTGTHPRETEKNIQAQFKRQLKRLGFSYDWDREINTTDPYY
150385918_Victivallis_vadensis    LPAEQYAVETGTHPEVTTQKNVDNFRQIKSLGFSYDWDREINTTDPGYF
10175904_Bacillus_halodu         LPAEQYAITGNSPAEFTEKNINTFRQIKSLGFSYDWDREINTTDPYY

```

116058126\_Ostreococcus\_tauri  
7267192\_Arabidopsis\_thalia  
2314727\_Helicobacter\_pylori  
6459971\_Deinococcus\_radiod  
83367833\_Rhodobacter\_sphaeroi  
48766678\_Rhodospirillum\_rubrum  
15889997\_Agrobacterium\_tumefa  
19712730\_Fusobacterium\_nuclea  
106888735\_Roseiflexus\_sp  
46130187\_Synechococcus\_elonga  
53763953\_Anabaena\_variab  
23129999\_Nostoc\_puncti  
16128625\_Escherichia\_coli  
30249126\_Nitrosomonas\_europa  
53762629\_Ralstonia\_eutrop  
126358263\_Pseudomonas\_putida  
7227154\_Neisseria\_mening  
15642942\_Thermotoga\_mariti  
48846878\_Geobacter\_metall

LPAEQYAIETGTHPSQTTVKNVGRFREQLQSLGFSYDWDREVATCDAKYY  
LPAEQYAIETGTHPKTTTLKNIDRFRLQKSLGFSYDWDRELSTTEPDYY  
MPAENAAIKHG IHPKWTYENIENMQKFEALGFSFKNREFATSDPDYT  
LPAENAAIKNNTNPATWTYANIEMRTGQFSRMGT MIDWSRFKATCDPEYY  
MPAENAAEMERGHPKDWTYGNIADMRAQMKPLGLSIDWSREFATCDPEYY  
LPAENAAIQRGVHPATWTRQNI AIMREQFKPMGLSIDWSREVSTCEPAY  
MPAENAAIQNVGHPKDWTYQNIATMRGQLKSMGLSLDWTREFATCDPEYY  
LPAENAAIQNGTHPAIWTKSNIENMRRQLKLMGFSYDWEREIASYTPPEYY  
LPAENAAIKYGRHPREWYTSNIAESKKSLEIAGIMYDWSREVTTCPNDYY  
LPAENAAIDRGVQPADWTYQNV AQMREQLKQLGLSYDWDREVTTCPSPDY  
LPAENAAIDRGVPPANWTYQNI TQMRQQLQRLGLSIDWDSEVATCDPEYY  
LPAENAAIDRGVPPAKWTYQNI TQMRQQLQRLGLSIDWECELATCDPEYY  
LPAENAAIKNGVPAWTYDNIAYMKNQLKMLGFGYDWSRELATCTPEYY  
LPAENAAIQKGVPAWTYDNIAYMRSQQLGFAIDWQRELATCDPQYY  
MPAENAAALNGVYAPAAWTYDNIAYMKQMQSMGLAIDWSREFATCDPEYY  
MPAENAAAMKNVAPAKWTYENIDYMKTQLKSLGLAIDWAREVTTCKPDYY  
MPAENAAAMKNVAPAAWTYDNI EYMKTQLKSLGFAIDWARETATCKPEYY  
LPAENAAIEKGLHPEEWTRKNIATIRQQVKLGLSYDWSREIATCDPEYY  
MPAENAAIQHSHPAKWTYENIAYMRSQKMKGLSYDWDRELATCDLDYY

60463472\_Dictyostelium\_discoi  
19683964\_Homo\_sapien  
89306112\_Tetrahymena\_thermoph  
15791045\_Halobacterium\_sp.  
11595633\_Neurospora\_crassa  
53715865\_Bacteroides\_fragil  
15826893\_Mycobacterium\_leprae  
106884629\_Clostridium\_phytofer  
76788931\_Chlamydia\_trachoma  
33235997\_Chlamydia\_pneumo  
46446681\_Parachlamydia\_sp.  
PLO00010890\_Pavlova\_lutheri  
21674468\_Chlorobium\_tepidu  
42527840\_Treponema\_dentic  
CM3072\_Cyanidioschyzon\_merolae  
87311335\_Blastopirellula\_marin  
83816700\_Salinibacter\_ruber  
150385918\_Victivallis\_vadensis  
10175904\_Bacillus\_halodu  
116058126\_Ostreococcus\_tauri  
7267192\_Arabidopsis\_thalia  
2314727\_Helicobacter\_pylori  
6459971\_Deinococcus\_radiod  
83367833\_Rhodobacter\_sphaeroi  
48766678\_Rhodospirillum\_rubrum  
15889997\_Agrobacterium\_tumefa  
19712730\_Fusobacterium\_nuclea  
106888735\_Roseiflexus\_sp  
46130187\_Synechococcus\_elonga  
53763953\_Anabaena\_variab  
23129999\_Nostoc\_puncti  
16128625\_Escherichia\_coli  
30249126\_Nitrosomonas\_europa  
53762629\_Ralstonia\_eutrop  
126358263\_Pseudomonas\_putida  
7227154\_Neisseria\_mening  
15642942\_Thermotoga\_mariti  
48846878\_Geobacter\_metall

RWTQEIFLRLLLAYRKSATVNWDPIDQTVLANEQVDQGRSWSNAIVEKK  
KWTQYLF IKLYLAYQKEALVNWDVPDQTVLANEQVDHGCSWSRGAKVEQK  
KWTQWIF IQLLLAYKKEAEVNWDPIDQTVLANEQVDQGRSWSRGAKVEKK  
KWNQWLFTEFRLVDRRAATVNWCPSCETVLADEQVEDDECWRCDTPVTER  
KHTQKIFLALHLAYQAEAEVNYDPVKTKVLANEQVDNGCSWSRGARVEKR  
HWTQWAF IKMF IAYLGNMTMVNWPALGTVLANEVDGVSERGGYPVIOK  
KWTQWIFLQIYLVRADSMVNWCPGLGTVLANEEVTDGRSDRGNFPVFRK  
KWTQWIFKQLYYAKYIDMPVNWCEELGTVLSNDEVIDGKSERGGYPVIRK  
KWTQKLFLLLYLAYMADMVNYCPELGTVLSNEE IENGFSDGGYPVERR  
HWTQKLFLLLYLAYMADMVNYCPELGTVLSNEEVENGFSEGGYPVERK  
KWTQWIFTKLYLAEAEMLVNYCPALGTVLANEE IENKTKDGGHPVERR  
-----  
KWTQWIFLKLAYLAI SEVDVNWCEELKVLANEEVDKIA---DGYTVVRR  
KWTQWIFLQFLAYEKEAPINWCPSCLTGLANEVVDGKGCERCQAQIQRK  
RWTQWIFLQVLYLAYQAEIPVNWCPALGTVLANEEVIDGRSERGGHPVIRK  
RWTQWIFLQVLYLAYLNEAPVNWCPALGTVLANEEVIDGKSERGNHPVQRI  
KWTQWIFLQVLYLAYQSEEPVNWCEELGTVLANEEVIDGKSERGGYPCERV  
KWTQWIFMQLHLAYLDEAVNWCPALGTVLANEEVIDGRSERGNHPVERR  
KWTQWIFIQLYLAYIDEAVNWCPALGTVLANEEVIDGKSERGGHPVERR  
KWTQWIFLRLLLAYQAEVPPVNWCPALGTVLANEEVIDGLSERGNHPVIRK  
KWTQWIFLQVLYLAYQAEVPPVNWCPALGTVLANEEVDGVSERGGHPVIRK  
KFEQRFF IDLWLIYRKAMLNWCPNDKTVLANEQVIDGRWCRCDETEVIOK  
RWNQWFF IEFWLAYKKGGLVNWCPKDQTVLANEQVNVNGHCERCQTAVERR  
GQQQAMF IDMLLIYRKNAVNWDPVDMTVLANEQVIDGKSERGNHPVERR  
RHEQKMF LDFLLAYRRESVNWDPVEHTVLANEQVIDGKGRSGAPVERR  
HRQQALFVDFMLVYRKQSKVNWDPVDHTVLANEQVIDGRGWSGALVEQR  
KWNQWLFKRMVLYKKSLSVNWCPDCQTVLANEQVEDGMCWRSKHTVIOK  
RWNQWFLLLLAYRAKATVNWDPVDQTVLANEQVDEGRSWSRGAKVEKR  
RWTQWFLQFLAYQKEATVNWDPIDQTVLANEQVDEGRSWSRGAKVERR  
KWTQWIFLQFLLAYQKEAAVNWDPIDQTVLANEQVDEGRSWSRGAIVERK  
KWTQWIFLQFLLAYQKEAAVNWDPIDQTVLANEQVDEGRSWSRGAIVERK  
RWEQKFFTELYLVYKTSVNWCPNDQTVLANEQVIDGCCWRCDTKVERK  
RWNQWFLRMLIAYQKTQVNWDPVDQTVLANEQVIDGCGWRTGAVVEKR  
RWNQWFLKMLIAYRKTGTVNWDPVDQTVLANEQVIDGRGWSRGAIVERK  
RWEQWFLTRFLIYRKNGTVNWDPADQTVLANEQVIDGRGWSGALIEKR  
RWEQWFLTKFLIVYRKNGTVNWDPVDQTVLANEQVIDGRGWSGALIEKR  
KWTQWIFLQVLYLAYKKA VNWCPKCTVLANEQVDGKGCERCSTVIR  
KWEQKVFLEMYLAYKKT SYVNWCPKCTVLANEQVEDGACWRCDSEVTQK

60463472\_Dictyostelium\_discoi  
19683964\_Homo\_sapien  
89306112\_Tetrahymena\_thermoph  
15791045\_Halobacterium\_sp.  
11595633\_Neurospora\_crassa  
53715865\_Bacteroides\_fragil  
15826893\_Mycobacterium\_leprae  
106884629\_Clostridium\_phytofer  
76788931\_Chlamydia\_trachoma  
33235997\_Chlamydia\_pneumo  
46446681\_Parachlamydia\_sp.  
PLO00010890\_Pavlova\_lutheri

EMKQWFYKITS MADRLTDDLDQLWSDEIKNMQKEWIGRSYGHILIEFQITV  
YLRQWF IKTTAYAKAMQDALADLW-YGIKGMQAHWIGDCVCGHLDFTLTA  
MLNQWFKITTEYKKELFQDLSLWPAQVQEMQRGWIGFSEGQIKFIEV  
DLQWFFETTAYADELDDGLDELWPSNVRDMQRNWVGRDGVVEPFTVVA  
KLKQWFLKISEPRESLLKDLTLWPERVLAQKNWLGKSKGATVVKFPIEV  
VMRQWCLRVSAYAQRLLDGLT VWTDSLKETQRNWI GRSEGAEMNFKFTI  
RLRQWMMRITAYADRLDLDLWPEQVKTMRQNWIGRSSGATVLFVSEV  
NMKQWV INQPAFAEKLEGLEE IWPES TKDMQRHWIGKSEGEVDLEFSI  
MLRQWVLRITAFADQLEGLDELWPEVSKQLQKNWIGKSSGASVNFVFAIEV  
MLRQWVLRITAYADKLEGLDALWPNVVKQLQKNWIGKSEGAIVTFHLEA  
PLKQWVILKITAYADRLDLDLWPEVSKKQLINWIGKSEGAIVQVIFSV  
-----

21674468\_Chlorobium\_tepidu  
42527840\_Treponema\_dentic  
CM3072\_Cyanidioschyzon\_merolae  
87311335\_Blastopirellula\_marin  
83816700\_Salinibacter\_ruber  
150385918\_Victivallis\_vadensis  
10175904\_Bacillus\_halodu  
116058126\_Ostreococcus\_tauri  
7267192\_Arabidopsis\_thalia  
2314727\_Helicobacter\_pylori  
6459971\_Deinococcus\_radiod  
83367833\_Rhodobacter\_sphaeroi  
48766678\_Rhodospirillum\_rubrum  
15889997\_Agrobacterium\_tumefa  
19712730\_Fusobacterium\_nuclea  
106888735\_Roseiflexus\_sp  
46130187\_Synechococcus\_elonga  
53763953\_Anabaena\_variab  
23129999\_Nostoc\_puncti  
16128625\_Escherichia\_coli  
30249126\_Nitrosomonas\_europa  
53762629\_Ralstonia\_eutrop  
126358263\_Pseudomonas\_putida  
7227154\_Neisseria\_mening  
15642942\_Thermotoga\_mariti  
48846878\_Geobacter\_metall

PLRQWVLKITYAERLLKDLDEVVPEVNVKQQRNWIGRSEGMEIDFELRV  
NLRQWLKITYAERLLEDLDELWPESIKIMQKNWIGKSTGAEVDFAIKV  
PMRQWVLRITAYAEERLLKDLDELWPEVNVKEMQRNWIGRSEGVEVTFPITV  
PLKQWMMRITDYADRLESDEGLWSEGIKARQRNWIGRSTGAEVDFYLRV  
PMRQWVLKITYEADRLEGLDELWPESTKEMQRNWIGRSEGANVYDFLEV  
PMKQWMLRITYEERLLQDLDELWPEGVKEMQRNWIGKSVGAEVIFKVTV  
PMKQWMLKITYADRLEDELWPEVNVKQQRNWIGRSEGVEVTFPITV  
PMKQWMLKITYADRLEDELWPEVNVKQQRNWIGKSEGAQLGFSLEV  
PMRQWMLKITYADRLEDELWPEVNVKQQRNWIGRSEGAEVNFSTIV  
ELYQYLLKITYAEELLKDLDELWPEVNVKQQRNWIGKSSGLQFGFKIEV  
NLSQWYLKITYAEELL-DFSATMPEKVRAMQTNWIGKSVGAEVTFD-TV  
ELTQWFFRISDYAGELLEALDRLWPEKVRMLQANWIGQSRGLQFASLEV  
KLSQWFLRITRYAEEDLAAIGDLWPKVRLMQRNWIGRSEGAQRVRFLEV  
ELTQWFFRITDFSQDLDELWPEKVRMLQANWIGRSEGLSLRWQITV  
ELEQWFFKITDYAEELLEGLHEEIVPEKVTMQRNWIGKSFGLKLLPI  
ELEQWFFRITAYAEERLLNDLKLWPEVNVKQQRNWIGRSEGAEVTFLLVV  
QLKQWFLKITYAEELLQDLDELWPEVNVKQQRNWIGKSTGAYLEFPVKV  
LLRQWFLKITYAEELLNDLKLWPEVNVKQQRNWIGKSVGAYLEFPVIAV  
LLRQWFFKITDYAEELLNDLKLWPEVNVKQQRNWIGKSTGAYLEFPVIAV  
EIPQWFLKITYAEERLLNDLKLWPEVNVKQQRNWIGRSEGVEITFNLTIV  
EIPGYLLAITRYADELLADLEKLWPEVNVKQQRNWIGKSVGVDITFPPLK  
EIPMYLKITDYAEELLGDLGLWPEVNVKQQRNWIGKSVGAYLEFPVIAV  
EIPMYFRITDYADELLESLDELWPEVNVKQQRNWIGKSRGMEVQFPPLKV  
EIPMYFKITDYAEELLNDLKLWPEVNVKQQRNWIGKSRGMTVRFALQV  
HLEQWFFKITDYAEERLLNDLKLWPEVNVKQQRNWIGKSTGAEDFPIRV  
ELEQWFFRITDYAEELLEYTEKLWPEVNVKQQRNWIGKSVGCEIDFPIKV

60463472\_Dictyostelium\_discoi  
19683964\_Homo\_sapien  
89306112\_Tetrahymena\_thermoph  
15791045\_Halobacterium\_sp.  
11595633\_Neurospora\_crassa  
53715865\_Bacteroides\_fragil  
15826893\_Mycobacterium\_leprae  
106884629\_Clostridium\_phytofer  
76788931\_Chlamydia\_trachoma  
33235997\_Chlamydia\_pneumo  
46446681\_Parachlamydia\_sp.  
PLO00010890\_Pavlovium\_lutheri  
21674468\_Chlorobium\_tepidu  
42527840\_Treponema\_dentic  
CM3072\_Cyanidioschyzon\_merolae  
87311335\_Blastopirellula\_marin  
83816700\_Salinibacter\_ruber  
150385918\_Victivallis\_vadensis  
10175904\_Bacillus\_halodu  
116058126\_Ostreococcus\_tauri  
7267192\_Arabidopsis\_thalia  
2314727\_Helicobacter\_pylori  
6459971\_Deinococcus\_radiod  
83367833\_Rhodobacter\_sphaeroi  
48766678\_Rhodospirillum\_rubrum  
15889997\_Agrobacterium\_tumefa  
19712730\_Fusobacterium\_nuclea  
106888735\_Roseiflexus\_sp  
46130187\_Synechococcus\_elonga  
53763953\_Anabaena\_variab  
23129999\_Nostoc\_puncti  
16128625\_Escherichia\_coli  
30249126\_Nitrosomonas\_europa  
53762629\_Ralstonia\_eutrop  
126358263\_Pseudomonas\_putida  
7227154\_Neisseria\_mening  
15642942\_Thermotoga\_mariti  
48846878\_Geobacter\_metall

FTTRAETIYGVSFLAISPHHSEIEKRELELDQYLKEIQENLKTFTNTGLTFY  
YTATPEAIYGTSHVAISPSHRLHGHSSSLKEALRMALVPGDKCLTPVMAV  
YTTRPDTIYGVTFLALAYDHLAQKEEDLADY--EKMVNKIGKVVDYIYAV  
FTTRVDTIHGATYFALAPDHLADRDDVAHFVEEVADEPQGVTEFTAT  
FTSRPDTLFGVQYIALAATHPSVKSDPELQAFSLTLPPIRANPLAYHEE  
FTTRADTVFGVTFMVLAPSESELVEQKAEVDAYLDRTRKRSVSVFSGSYAI  
FTTRPDTMFGVTVLVLAPENLVTPGAATAVYRAIVKEKTVGFLGRYAT  
YTTCIETIYGITFMVLAPDGIQVENKEEVEAYINETLTKSGILKGIYAI  
FTTRPDTLFGVSVFLALAPEHPLVEQKAVVAQYIKETQTKSGVFTGGYAK  
FTTRLDLTLGVSFLVIAPEHPDLEQRDEVTAYVQESLTKTKTVFTGNVAK  
FTTRPDTLFGVSVLVLAPENLVTPGAATAVYRAIVKEKTVGFLGRYAT  
-----  
YTTRPDTLFGATYLVISPEHPMAQQLVAVKKYIEQAKKEKTVGFTGSYAI  
YTTRPDTIFGATYMLVLAPEHELVNQEKAVAAYIEEAANKTVGFTGAYAI  
FTTRPETISGATYLVVAPEYPIAQAQEQVQRYVEQALKLKSGVFTGRYAO  
YTTRPDTLFGATYMVIAPEHPLVEQSAAVKAYCDKAAKEKTVGFTGSYAI  
YTTRPDTLFGATYMLVLAPEHEHLEHREDVDVEYCRQAL-DKTVGFTGSYAV  
YTTRPDTLFGATYMLVLAPEHPLVEQSAAVKAYCDKAAKEKTVGFTGSYAI  
FTTRPDTLFGATYMLVLAPEHPLVEQSAAVKAYCDKAAKEKTVGFTGSYAI  
YTTRPDTLFGATYMLVLAPEHPLVEQSAAVKAYCDKAAKEKTVGFTGSYAT  
YTTRPDTLFGATYMLVLAPEHPLVEQSAAVKAYCDKAAKEKTVGFTGSYAK  
FTTRADTVGVTYIAIAPEHPLVQVSQEVSKMIKAIL-EKKGAFGLIYAI  
FTTRPDTLFGATYMLVLAPEHPLVEQSAAVKAYCDKAAKEKTVGFTGSYAT  
YTTRPDTLFGATYMLVLAPEHPLVEQSAAVKAYCDKAAKEKTVGFTGSYAV  
YTTRPDTLFGATYMLVLAPEHPLVEQSAAVKAYCDKAAKEKTVGFTGSYAV  
YTTRPDTLFGATYMLVLAPEHPLVEQSAAVKAYCDKAAKEKTVGFTGSYAV  
FTTRIDTIVGVSVAVVAPEHPVKNPNSIKDKVTEMKREKNGIDSGWHIE  
FTTRPDTLFGATYMLVLAPEHPLVEQSAAVKAYCDKAAKEKTVGFTGSYAI  
FTTRPDTVYGVSYVVLVLAPEHPLVEQSAAVKAYCDKAAKEKTVGFTGSYAV  
YTTRPDTVYGVSYVVLVLAPEHPLVEQSAAVKAYCDKAAKEKTVGFTGSYAI  
YTTRPDTVYGVSYVVLVLAPEHPLVEQSAAVKAYCDKAAKEKTVGFTGSYAI  
YTTRPDTVYGVSYVVLVLAPEHPLVEQSAAVKAYCDKAAKEKTVGFTGSYAI  
FTTRADTVGVTYVVAEHPVAHNQPDVAFIESCRQEKKGATGLYVL  
FTTRADTVGVTYVVAEHPVAHNQPDVAFIESCRQEKKGATGLYVL  
FTTRPDTLFGATYMLVLAPEHPLVEQSAAVKAYCDKAAKEKTVGFTGSYAV  
FTTRPDTLFGATYMLVLAPEHPLVEQSAAVKAYCDKAAKEKTVGFTGSYAV  
FTTRPDTLFGATYMLVLAPEHPLVEQSAAVKAYCDKAAKEKTVGFTGSYAV  
FTTRPDTLFGATYMLVLAPEHPLVEQSAAVKAYCDKAAKEKTVGFTGSYAV

60463472\_Dictyostelium\_discoi  
19683964\_Homo\_sapien  
89306112\_Tetrahymena\_thermoph  
15791045\_Halobacterium\_sp.  
11595633\_Neurospora\_crassa

QPITKKYIPLILSNFVHADYGTGAVMGVPSHNRSDYQVAKQONLKLPLV  
NMLTQQEQVPPVILAKADLEGSLDSKIGIPSTSSSEDTILAQTGLGAYSEVI  
NPLSQEQVPIYLVDYVLKDYGTGAVMGVPAHDDRQEFQAKYQIPIKEVI  
NPATGAEIPVVADVFLSDVGTGALMAVPAHDDRQEFQAKYQIPIKEVI  
TPEDTKSLPIYVAPYVLDYGEVAVMGVPGHDLRDHAFEHYDAPVRFVL



53715865\_Bacteroides\_fragil  
15826893\_Mycobacterium\_leprae  
106884629\_Clostridium\_phytofer  
76788931\_Chlamydia\_trachoma  
33235997\_Chlamydia\_pneumo  
46446681\_Parachlamydia\_sp.  
PLO00010890\_Pavlova\_lutheri  
21674468\_Chlorobium\_tepidu  
42527840\_Treponema\_dentic  
CM3072\_Cyanidioschyzon\_merolae  
87311335\_Blastopirellula\_marin  
83816700\_Salinibacter\_ruber  
150385918\_Victivallis\_vadensis  
10175904\_Bacillus\_halodu  
116058126\_Ostreococcus\_tauri  
7267192\_Arabidopsis\_thalia  
2314727\_Helicobacter\_pylori  
6459971\_Deinococcus\_radiod  
83367833\_Rhodobacter\_sphaeroi  
48766678\_Rhodospirillum\_rubrum  
15889997\_Agrobacterium\_tumefa  
19712730\_Fusobacterium\_nuclea  
106888735\_Roseiflexus\_sp  
46130187\_Synechococcus\_elonga  
53763953\_Anabaena\_variab  
23129999\_Nostoc\_puncti  
16128625\_Escherichia\_coli  
30249126\_Nitrosomonas\_europa  
53762629\_Ralstonia\_eutrop  
126358263\_Pseudomonas\_putida  
7227154\_Neisseria\_mening  
15642942\_Thermotoga\_mariti  
48846878\_Geobacter\_metall

NPLTNEPIPVWISDYVLAGYGTGAIMAVPAHDSRDYFAKHFNLEIRPLI  
NPVNGKEVPLFLIGDFVLASYGTGAVMAVPSHDQRDFEYAMVHNIPMQVI  
HPVTHELIPWIADYVLIIGFSGAVMGVPAHDERDLLFAEQFNLPVSVL  
HPITGNLLPVWISDYVVLGYGTGVVMGVPADDERDREFAEMFSLPIHEVI  
NPVNHKEIPWISDYVLMNVGTGAIMAVPAHDERDFEFAKTFKLPIIPVY  
-----  
NPANGEALPVWISDFVLTYSYGTGAIMSVPAHDSRDWEFAKFGLPPIREVI  
NPLTEQKIPVWISDYVLLISYGTGAIMAVPAHDERDFEFAAQFNLPKIKVV  
NPVTEGHEIPIWADYVLSYGTGAIMAVPGHDARAFETFPALPIRIVI  
NPVNDKTPWIADYVLIISYGTGAIMAVPAHDERDFEFAQTFDIPVIAV  
NPVNGEPIPIWADYVLSYGTGAIMAVPAHDERDHAFANKYDLPPIREVV  
NPVNGVKIPWIADYVLIISYGTGAIMAVPAHTRDFEFAQKFDLPKICII  
NPVNGEKVPIWIADYVLSYGTGAIMAVPAHDERDFEFAKTFDLPPIREVI  
HPLTGDKVPIWADYVLSYGTGAIMAVPAHDERDYDFAKAFDLPITFV  
NPANGDAIPIWADYVLSYGTGAIMAVPAHTRDNEFALKYNIPIKVVV  
HPLTKQKIPVWVANFALANYGSGALMGVPACDERDFEFANLYHIPIKVI  
HPISGHQLPIWADYVLSYGTGAIMAVPAHDERDFEFAKTFDLPPIREVI  
HPFDTAELPVYIANFILMDYGTGAIFGCPAHQDRDFEFAKYGFLPIPPVF  
HPFDPAELPVYVANFVLMYGTGAIFGCPAHQDRDMDFARKYGLPVRVAV  
HPLDPSSELPVYVANFVLMYGTGAIFGCPAGDQRDLDFARKYGLPVRVAV  
NPVNGEIVPLWADYVLMNYGTGAVMGVPAHDERDFVAGKFNLPVQVI  
NPVNDERIPIWIADYVLMGYGTGAIMAVPAHQRDFEFARQFGLPVRVVV  
NPFTGQAVPIWIADYVLYEYGTGAVMGVPAHDSRDFAFARQYGLPVQVPI  
NPFTGEEVPIWIADYVLYEYGTGAVMGVPAHVDVDFKFAQRYDLPIDFVI  
NPFTGEEVPIWIADYVLYEYGTGAVMGVPAHVDVDFKFAQRYDLPIDFVI  
HPLTGEEIPVWVANFVLMYGTGAVMAVPGHQDRDYEFASKYGLNIKPV  
HPLTGERLPVWVANYVLMYGTGAVMAVPAHDERDFARQHSPLPIKVI  
HPLTGEQVWVWVGNVLMYGTGAVMGVPAHDERDFAFANKYKLPPIRQVI  
HPLTGEKLPVWVANYVLMHYGTGAVMAVPAHDERDFEFAKYNLPIKAVV  
NPLNGDKLEVWIANYVLMYGTGAVMAVPAHDERDFEFAKYNLPIKQVI  
NPVTGERIPIVYANYVLMYGTGAIMGVPADHQRDFEFAKYGIPKIVVI  
NPVTNRRMPVFLANFVLLDYGTGAVMAVPTHQDRDFEFAKYNLPIKQVI

60463472\_Dictyostelium\_discoi  
19683964\_Homo\_sapien  
89306112\_Tetrahymena\_thermoph  
15791045\_Halobacterium\_sp.  
11595633\_Neurospora\_crassa  
53715865\_Bacteroides\_fragil  
15826893\_Mycobacterium\_leprae  
106884629\_Clostridium\_phytofer  
76788931\_Chlamydia\_trachoma  
33235997\_Chlamydia\_pneumo  
46446681\_Parachlamydia\_sp.  
PLO00010890\_Pavlova\_lutheri  
21674468\_Chlorobium\_tepidu  
42527840\_Treponema\_dentic  
CM3072\_Cyanidioschyzon\_merolae  
87311335\_Blastopirellula\_marin  
83816700\_Salinibacter\_ruber  
150385918\_Victivallis\_vadensis  
10175904\_Bacillus\_halodu  
116058126\_Ostreococcus\_tauri  
7267192\_Arabidopsis\_thalia  
2314727\_Helicobacter\_pylori  
6459971\_Deinococcus\_radiod  
83367833\_Rhodobacter\_sphaeroi  
48766678\_Rhodospirillum\_rubrum  
15889997\_Agrobacterium\_tumefa  
19712730\_Fusobacterium\_nuclea  
106888735\_Roseiflexus\_sp  
46130187\_Synechococcus\_elonga  
53763953\_Anabaena\_variab  
23129999\_Nostoc\_puncti  
16128625\_Escherichia\_coli  
30249126\_Nitrosomonas\_europa  
53762629\_Ralstonia\_eutrop  
126358263\_Pseudomonas\_putida  
7227154\_Neisseria\_mening  
15642942\_Thermotoga\_mariti  
48846878\_Geobacter\_metall

GKROTYNRIHDWLISRQRYWGTPIPIVHCGDVPVPSDQLPVELPIDIQFT  
EGDVTSDKLKDWLISRQRYWGTPIPIVHCGPTVPVLEDLPVLPNIASTFT  
K-----HDWLVSRQRYWGVPIPIVHCGVLPVPEQDLPVILPEKLGNL  
AASAVQYQLRDWGVSRQRYWGTPIPIVHCGVSPVDDDLPELPEFV--H  
AKETEKWRLRDWLISRQRYWGTPIPIVHCGVTPVPEQDLPVELPEVDEHG  
ERVKNYRLRDLAIFSRQRYWGEFFPVYGMPTMIDESCLPLPEVAKFT  
AHARIEFKLRDLWLFARQRYWGEFFPIIYGRPHALDEAALPVELPDVPPYD  
DRKSVNYHFRWIFARQRYWGEFFPVVYDEIHVLSNDELPLILPVLEDYG  
NAAKIAYKLRDLWLFARQRYWGEFFPIIYHGSRCPLRDYELPLLPPEIQDY  
DRAKTYRRLRDWLFARQRYWGEFFPIIYHGTPLRDELPLLPNIDYDE  
DKSATYKLRDLWLFARQRYWGEFFPLKGSVRLLEDELPLCPAITNYT  
-TR-----  
KKRKVNYKLRDWFVSRQRYWGEFFPIIKHGTMRP--ETNLPVTLPEVEAYT  
AKRAVNYKLRDWFVSRQRYWGEFFPIIPLVHCGVPLNEHDLPLTLPEVESY  
DERKVNKLRDWFVSRQRYWGEFFPIIVFGEPLPVDEQALPVELPTTESIS  
DRTAVNYKLRDWFVSRQRYWGEFFPIILKGLKILPVVQDLPVNLPHLEDFL  
EERTVNYQLQDWFVSRQRYWGEFFPIIVFGEDKPVPEELPVLPDLVDFS  
AREAVNYKLRDWFVSRQRYWGEFFPIIYHGSIELVNSDELPLNPEMEDFS  
STKKVNYRDLWLFARQRYWGEFFPIVHGTMTVPEDELPELPEKMSSEIS  
SRKQTYNKLRDWLFARQRYWGEFFPVFNLAVPVPESELPLILPETDNFS  
RKKKVNKLRDWFVSRQRYWGEFFPIIPLIGETIAISESELPLLPEDLFT  
QKRVINYRLQDWFVSRQRYWGEFFPIIYHCGVTPVPEQDLPVILPEVDEHG  
RKAKTYRRLRDWLFARQRYWGTPIPIVHCGVTPVPEQDLPVILPEVDEHG  
VRGVTNYRLRDWGISRQRYWGCPIPIVHCGVPEAKENLVRPDDVTFD  
AEGVTVYRDLWGVSRQRYWGCPIPIVHCGVTPVPEQDLPVILPEVDEHG  
AERKVNFRDLWGISRQRYWGCPIPIVHCGVTPVPEQDLPVILPEVDEHG  
TKRTYKYLKDWGISRQRYWGTPIPALYCGVELEKDENLPLPDDIEFS  
QKGTVYRDLWLSRQRYWGTPIPLMHGTIKPVPEQDLPVLLPEVQDYL  
QQAHVYRDLWLSRQRYWGCPIPIVHCG--PVAAADLPVQLPDSVQFS  
AKERIQYRDLWLSRQRYWGTPIVHCGVTPVPEQDLPVILPEVDEHG  
AKVRVYRDLWLSRQRYWGTPIVHCGVTPVPEQDLPVILPEVDEHG  
LERKVNFRDLWGVSRQRYWGTPIPMVGTVMPTDDQDLPVILPEVDEHG  
REKRVYRDLWGISRQRYWGCPIPLVHCGVTPVPEQDLPVILPEVDEHG  
DEKKITWRLRDWGISRQRYWGTPIPLVHCGVTPVPEQDLPVILPEVDEHG  
RKSRTQYRDLWGISRQRYWGCPIPIVHCGVTPVPEQDLPVILPEVDEHG  
AEPKTYRDLWGISRQRYWGTPIPIVHCGVTPVPEQDLPVILPEVDEHG  
KKRSVQYKLRDLWLSRQRYWGTPIPIVHCGVTPVPEQDLPVILPEVDEHG  
QTKTVNFRDLWGISRQRYWGTPIPIVHCGVTPVPEQDLPVILPEVDEHG

60463472\_Dictyostelium\_discoi  
19683964\_Homo\_sapien  
89306112\_Tetrahymena\_thermoph  
15791045\_Halobacterium\_sp.  
11595633\_Neurospora\_crassa  
53715865\_Bacteroides\_fragil  
15826893\_Mycobacterium\_leprae  
106884629\_Clostridium\_phytofer  
76788931\_Chlamydia\_trachoma  
33235997\_Chlamydophila\_pneumo  
46446681\_Parachlamydia\_sp.  
PLO00010890\_Pavlova\_lutheri  
21674468\_Chlorobium\_tepidu  
42527840\_Treponema\_dentic  
CM3072\_Cyanidioschyzon\_merolae  
87311335\_Blastopirellula\_marin  
83816700\_Salinibacter\_ruber  
150385918\_Victivallis\_vadensis  
10175904\_Bacillus\_halodu  
116058126\_Ostreococcus\_tauri  
7267192\_Arabidopsis\_thalia  
2314727\_Helicobacter\_pylori  
6459971\_Deinococcus\_radiod  
83367833\_Rhodobacter\_sphaeroi  
48766678\_Rhodospirillum\_rubrum  
15889997\_Agrobacterium\_tumefa  
19712730\_Fusobacterium\_nuclea  
106888735\_Roseiflexus\_sp  
46130187\_Synechococcus\_elonga  
53763953\_Anabaena\_variab  
23129999\_Nostoc\_puncti  
16128625\_Escherichia\_coli  
30249126\_Nitrosomonas\_europa  
53762629\_Ralstonia\_eutrop  
126358263\_Pseudomonas\_putida  
7227154\_Neisseria\_mening  
15642942\_Thermotoga\_mariti  
48846878\_Geobacter\_metall

KGKNLLNQLDETDMDTFVDSWYFLRFLDSSQSIFSSSELVNRMPIDVY  
GKGPPPLAMASETDTMDTFVDSAWYFRYTDPPHSPFNTAVADYWMPVDLY  
QKNNPLAHIKETDLDTFVDSWYFLRFPDSSLQIFDNLIKYIWPVDLY  
TTGNPLDAAEETDMDTFVDSWYFLRFASPDAPFDQORANDWLPVDEY  
KKTNPLESQTDMDTFVDSWYMRFDIAKEAPFSPEKAKVLTVPVDLY  
ETGPPLGHATELNTMPGFAGSSAYLYRMDPHEALVSPAVDQYWKNDVLY  
SEPPPLAKATDNTMMPQWAGSWYELRYTDPSERLCAKENEAYWMPVDLY  
KNGAPLENATETSTMPGSAGSSWYFMRYPIDQEEFANQELLKHWLPVDLY  
GVGGPLAKVRTHTMPQWAGSCWYLRFCDSAAAPWAKEKEQYWMPVDLY  
FGGGLAKAQETTMPQWAGSCWYLRFCDSQPLWSEKESYWMPVDLY  
GDGGPLTQIKDNTMMPQWAGSCWYLRFCDPTEKAFSPEKEKYWLPVDLY  
-----AGSCWYLRFMPTKAAWSKEAADAWLPVDLY  
STGSPLANIEETNTMPQWAGSCWYLRFDPSDALVDPSELYWMPVDLY  
GTGSPLAAIDETNTMPQWAGSCWYLRFDNPAEAFADKEKCDYWMPVDLY  
GDGSPLAKIVETNTMPQWAGSCWYLRFDNAERLVDPVKERYWMPVDLY  
GRPPPLEKASETNTMPQWAGSCWYLRFDIPDQVLIDREKEKAWMPVDLY  
GTPGPLATIEETNTMPQWAGSCWYLRFDIPDQVLIDREKEKAWMPVDLY  
GTGPPLAKAKETNTMPQWAGSCWYLRFDIPDQAWDPAKEKYWMPVDLY  
GTGSPLANATEETNTMPQWAGSCWYLRFDPERMIADPEKLLKWLVDIY  
GSGGPLANCHEETNTMPQWAGSCWYLRFDPEDALIDGSELYWLPVDLY  
GTGPPLSKAVETSTMPQWAGSCWYLRFMDDPEALVDKEKEKYWSPVDVY  
GEGNPLEKHAETDMDTFIQSSWYFLRYTTPENQAFDQNYLYFMPVDY  
PTGSPLKLEEDTMDTFVDSWYMYRYSPLDGGPFDPKAG-LLPVDLY  
VPGNPLDRHPEETDMDTFVDSWYARFATAPATPTDPEEAkWMPVDY  
KPGNPLDHPETDFTDFFESSWYFARFCAPTDRAFEREADVYWLPVDY  
VPGNPLDRHSETDMDTFVDSWYTRFTAPEDEPTDQVANHWLPVDY  
GNGNPLETSNDTMDTFVDSWYFLRYCDPLNLPFSKEIVDKWTPVDY  
PKGSPLAAAEDTMDTFVDSWYFLRFCDADREIFREARQWMPVDY  
GRGSPLAQLEETDMDTFMCSWYLRYSDAPEIAFTKDKVNDWLPVDY  
GRGSPLAQLEETDMDTFIDSSWYFLRFTDAAEQVFEAKTNDWMPVDY  
GRCSPLTQLEETDMDTFIDSSWYFLRFPDAEQVFDSSKANDWMPVDY  
GITSPILKADPETDFTDFFESSWYARYTCKPEGMLDSEANWLPVDY  
GSGNPLAKTPEETDMDTFVDSWYFIRYACPSAAMTDQR-ANYWLPVDY  
GTGNPLNKDPEETDMDTFIDSCWYMRYTCDPAATMVDARNDWMPVDY  
GAGSPLAKMPETDMDTFVDSWYFARYASPKGLVDPKAAHWLPVDY  
GMGSPLAKMPETDMDTFMSSWYFRYMSPSDGMVDPAAKYWGAVDY  
PTGSPLSFHEETDMDTFVDSWYFLRYVNPEDKPFEPDDVNYWLPVDY  
GEGSPLKLDDETDMDTFVQSSWYFLRYCCPAAGPIDKARAEYWMSVDY

\* . \* \* : : \*

60463472\_Dictyostelium\_discoi  
19683964\_Homo\_sapien  
89306112\_Tetrahymena\_thermoph  
15791045\_Halobacterium\_sp.  
11595633\_Neurospora\_crassa  
53715865\_Bacteroides\_fragil  
15826893\_Mycobacterium\_leprae  
106884629\_Clostridium\_phytofer  
76788931\_Chlamydia\_trachoma  
33235997\_Chlamydophila\_pneumo  
46446681\_Parachlamydia\_sp.  
PLO00010890\_Pavlova\_lutheri  
21674468\_Chlorobium\_tepidu  
42527840\_Treponema\_dentic  
CM3072\_Cyanidioschyzon\_merolae  
87311335\_Blastopirellula\_marin  
83816700\_Salinibacter\_ruber  
150385918\_Victivallis\_vadensis  
10175904\_Bacillus\_halodu  
116058126\_Ostreococcus\_tauri  
7267192\_Arabidopsis\_thalia  
2314727\_Helicobacter\_pylori  
6459971\_Deinococcus\_radiod  
83367833\_Rhodobacter\_sphaeroi  
48766678\_Rhodospirillum\_rubrum  
15889997\_Agrobacterium\_tumefa  
19712730\_Fusobacterium\_nuclea  
106888735\_Roseiflexus\_sp  
46130187\_Synechococcus\_elonga  
53763953\_Anabaena\_variab  
23129999\_Nostoc\_puncti

VGGIEHAILHLLYSRFITKFLKQQLIDHSEPFKVLQAQGLVKSEKMSKS  
IGGKEHAVMHLYARFFSHFCHDQKMKVHREPFHKLQAQGLIKGEKMSKS  
IGGHEHAILHLLYARFVTHKFLHQQVFLPHEPFKQLIVQGLVLAEKMSKS  
VGGDEHAVMHLLYSRFVTKAFADLDLHREPFAGLTTQGMVLGKTKMSKS  
IGGVEHAILHLLYSRFYKFLMTSSPASSEEPFKRLITQGMVHGEKMSKS  
VGGTEHATGHLIYSRFWFKFLHDWGISVAEPEFQKLVNQGMIQGEKMSKS  
VGGAEHAVLHLLYARFVHVKVLYDLGHVSSREPYRRLINQGYIQAQKIGKS  
IGGPEHAVGHLMYSRIWNRVLYDKGLSPVKEPFKLVHQQMILGKMGKR  
IGGAEHAVLHLLYARFVHQQIFVYEAQIVSTPEPFKLVNQGVLAEKMSKS  
IGGAEHAVLHLLYSRFVHVRVYDAGLVSTPEPFKLVNQGVLAEKMSKS  
IGGVEHAVLHLLYARFVHVKVLYDCGYVHTLEPFQTLRNQGLVADKMSKS  
VGGAEHAVLHLLYARFVHVKVLYDAGLVAAPEPFARLVHQQMILGKMSKS  
IGGAEHAVLHLLYSRFVHVKVLYDLGVVSTKEPFQRLFNQGMILGKMSKS  
VGGTEHAVLHLLYARFVHVKVLYDLGLVSTKEPFTRRLINQGMITSKMSKS  
VGGVEHAVLHLLYARFVHVKVLYDLGVVSTPEPFRLRNQGMILGHKMSKS  
IGGAEHAVLHLLYARFVHVKVLYDGRVVGTAEPFQKLVNQGMIKGKMSKS  
VGGSEHAVLHLLYARFVHVKVLYDAGVVSTKEPFQTLVHQQMILGHKMSKS  
VGGAEHAVLHLLYSRFVHVKVLYDLGLVSTKEPFKLVNQGMIKGKMSKS  
IGGAEHAVLHLLYARFVHVKVLYDLGVVSTKEPFQKLVNQGMIKGKMSKS  
VGGAEHAVLHLLYARFVHVKVLYDIGVVSTKEPFQRLVSNQGMILGHKMSKS  
VGGAEHAVLHLLYSRFVHVKVLYDIGVVSTKEPFKLVNQGMIKGKMSKS  
IGGIEHAILHLLYSRFVTKALRDLGVLHLDPEPFKQLITQGMVLAEKMSKS  
TGGIEHAILHLLYSRFVTKVMDMGLTTQSEPFARLRNQGMLGKMSKS  
IGGIEHAILHLLYSRFVTRALRDCGYLGVSEPFGLFTQGMICHEKMSKS  
IGGIEHAILHLLYSRFVTRAMRETGHVGVKPEPFKLVNQGMIKGKMSKS  
IGGVEHAVMHLLYARFFHVKVLYDLGLSSNEPFKRLITQGMVLGKMSKS  
IGGVEHAILHLLYARFITKVLVYDEGLVPEDEPFKALFTQGMVQVTKMSKS  
VGGIEHAILHLLYSRFVTKVLRDRGLLSFDEPFKRLITQGMVQVTKMSKS  
VGGIEHAILHLLYSRFVTKVLRDRGLLNDFDEPFQRLITQGMVQVTKMSKS



|                                |                                                      |
|--------------------------------|------------------------------------------------------|
| 48766678_Rhodospirillum_rubrum | LVRHVHKAVAGVTDDLEFNAAVARLRELTNAILETAARLAAPMIPHIAEE   |
| 15889997_Agrobacterium_tumefa  | ASKAAHKTLLKAVQEDLDFNKAIAIRIYELVNALVEILIRIIAPMTPHLAAE |
| 19712730_Fusobacterium_nuclea  | LLIKLNQTIKKVTDIAEFNTAIAANMELINEVLKIIIMLSPFVPHFCDE    |
| 106888735_Roseiflexus_sp       | LYRKLHETIRKVTLDTEFNNTAIAALMELLNEAAATFARLLSPFAPHLAAE  |
| 46130187_Synechococcus_elonga  | LRRAVHTAIQAVTEDELELNTAIAELMKLTNALVQTLVLLLAPFAPHIAEE  |
| 53763953_Anabaena_variab       | LRRAIHSAIQSVTEDELEFNNTAISELMKLSNALIHTLVVLLAPFAPHIAEE |
| 23129999_Nostoc_puncti         | LRRAIHTAIQAVTEDVEFNNTAISELMKLSNALIRTLVILIAPFAPHIAE   |
| 16128625_Escherichia_coli      | LRRDVHKTIAKVTDGIFNTAIAAIMELMNKLLAVVRMLNPFTHICFT      |
| 30249126_Nitrosomonas_europa   | LRCQLHQTIVKVTDDLEFNNTAIAAIMELMNELLENIIVLLSPIVPHICHV  |
| 53762629_Ralstonia_eutrop      | LRREIHGVLKQANYDYQYNTVVSATMKMLNALFGILLRVLYPVVPHITHG   |
| 126358263_Pseudomonas_putida   | IRRAIHAAIKQASTDVGFNNTAIAQVMTVMNVLLEAVTLLLAPITPHISHE  |
| 7227154_Neisseria_mening       | LRHKLHATTAKVSDDYGFNTAIAAVMELLNQYLETAVRLLWPVPHICET    |
| 15642942_Thermotoga_mariti     | LRRKLSHIIKKITEDIENNTAISGLMELVNLHLEKTLALSFPFAPHLAAE   |
| 48846878_Geobacter_metall      | LRRAVHKTIRKVTDDIDFNNTAIAAIMELVNAIIESVIMLSPFVPHVTEE   |

: . \*

|                                |                                 |
|--------------------------------|---------------------------------|
| 60463472_Dictyostelium_discoi  | HWKSLVFNQRWPKPTPSALVRDFNSLVIQ   |
| 19683964_Homo_sapien           | IWAGLVLLQAWPAVDPEFLQQEVEVQMAVL  |
| 89306112_Tetrahymena_thermoph  | IAENLEYQFVWPD-----LAIK          |
| 15791045_Halobacterium_sp.     | CWTALVAEAAWPTPDRVSDHHRATSLIE    |
| 11595633_Neurospora_crassa     | CWHVLAARFPVDPGTEGLLKRKQTCVAQV   |
| 53715865_Bacteroides_fragil    | LWDTLVCDQAWPTFNEQYLVEDTVNYTIS   |
| 15826893_Mycobacterium_leprae  | LWLRLLANGPFPQADPAYLVDDTVEYYPVQ  |
| 106884629_Clostridium_phytofer | MWNVLLANESWPYDEDAIKEDTITIGVQ    |
| 76788931_Chlamydia_trachoma    | LWVLLVQKSGWPSVLEPEYLEGQTVTIVVQ  |
| 33235997_Chlamydomyxa_pneumo   | LWVILIDQAAWPDIDESYLVQAVTTFVVO   |
| 46446681_Parachlamydia_sp.     | VWEHLLSFTYPQVEEKYLQENVITYVVQ    |
| PL000010890_Pavlova_lutheri    | MWQRLLEYEPWPQYDEA-----          |
| 21674468_Chlorobium_tepidu     | LWQALISGAVVWVFDKALATDDVLTIAVQ   |
| 42527840_Treponema_dentic      | LWQKMIAYSHWPMFVEKFCVDQCTTVVVQ   |
| CM3072_Cyanidioschyzon_merolae | MWQELIAYEPWPDYDPQYLVQETVVYAVQ   |
| 87311335_Blastopirellula_marin | LWAVLLAYHPWQFDEKFTKDEIEIIPVQ    |
| 83816700_Salinibacter_ruber    | LWARLLAYADWPAYDDELIRREVVEVMPVQ  |
| 150385918_Victivallis_vadensis | LWSTLLAYEPWPVWDEKVLVNEVEILVQ    |
| 10175904_Bacillus_halodu       | LWSKLIAYEPWPTYDEAFVLEVEEIVVQ    |
| 116058126_Ostreococcus_tauri   | MWERLNSKTSWPVADDSFLVEDTVDIGVQ   |
| 7267192_Arabidopsis_thalia     | LWSRLLAYESFPKANPDYLNKNTTIVLPVQ  |
| 2314727_Helicobacter_pylori    | LSERLRENFKPIAIDEDALMEDFMTLGLT   |
| 6459971_Deinococcus_radiod     | IWHERVHTAQWQVDEAAVDRDVTITIGVQ   |
| 83367833_Rhodobacter_sphaeroi  | VWSMLVAQAPWPKADPALLVDDMVTLPVQ   |
| 48766678_Rhodospirillum_rubrum | MWSHLLAETPWPWTWDLMLLIDDQVTIAVQ  |
| 15889997_Agrobacterium_tumefa  | CWSALVAETPWPVTFVAVLVEENDVVMVPVQ |
| 19712730_Fusobacterium_nuclea  | IWEELLFNEKWPEYDEKMLSSDETTIAVQ   |
| 106888735_Roseiflexus_sp       | VHSWCVVDAGWPEWDESALVLDEVEIVLQ   |
| 46130187_Synechococcus_elonga  | LWQQLVHLEGWVPLDESALIVDEIPLVIQ   |
| 53763953_Anabaena_variab       | LWQLLVHTQTWPAFDPAALVADEITLVVQ   |
| 23129999_Nostoc_puncti         | LWHLIHTQTWPSFDPAALVADEITLVVQ    |
| 16128625_Escherichia_coli      | LWQELIDNAPWPVADEKAMVEDSTLVVVQ   |
| 30249126_Nitrosomonas_europa   | LWRELLDQWPVQADDQALIQDEVEIVVQ    |
| 53762629_Ralstonia_eutrop      | LWDALLDAPWPVQVDEGALVRTIEIEMVLQ  |
| 126358263_Pseudomonas_putida   | LWQQLVIDAAWPSVDEQALVQDTITLVVQ   |
| 7227154_Neisseria_mening       | LWSELLWEAGWPTVDEAALVKSEIEVMVQ   |
| 15642942_Thermotoga_mariti     | FWHDLVVQSWPSYDPKALEVEEVEIAIQ    |
| 48846878_Geobacter_metall      | LWEALVEAGWPSFDPSAAVDEEFLIVVQ    |

**Note:** All top hits in GenBank searches (using the *Cyanidioschyzon* sequence and *Arabidopsis* NP\_192344 as queries) are from firmicutes, CFB bacteria and lentisphaerae. These sequences also differ from others in sharing several unique residues and a 1-bp insertion. Sequences of *Neurospora* and *Homo* are mitochondrial precursors according to GenBank annotations. In *Arabidopsis* (GenBank accession number NP\_192344 and TAIR locus AT4G04350), the protein product is targeted to both chloroplasts and mitochondria. The plant sequences are distantly related to other eukaryotic homologs based on both sequence similarity and phylogenetic analyses. Sequence of *Pavlova* was obtained from TBESTDB.

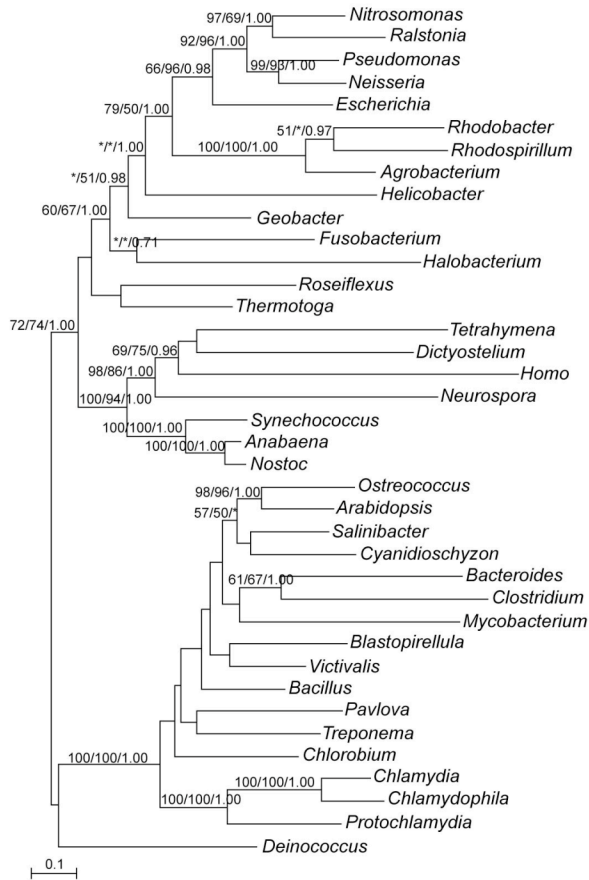

**Figure 17.** Molecular phylogeny of leucyl-tRNA synthetase. P-value = 0.235 from AU test for the presented tree. AU tests were also performed on alternative topologies including (A) monophyly of all eukaryotic sequences, and (B) monophyly of cyanobacterial and photosynthetic eukaryotic sequences. Topology A investigates if all eukaryotic sequences have the same origin (e.g. mitochondrial) whereas topology B investigates if photosynthetic eukaryotes acquired this gene from plastids. P-values < 0.001 from AU tests for both alternative topologies.

## 18. Ribosomal protein L11 methyltransferase (D)

CLUSTAL X (1.83.1) multiple sequence alignment

```

24214091_Leptospira_interr      EYEEAYKEFYKPFIIISYRVIPTWFPLLVPGLAFGTGHHETTRLVLGRMG
91206171_Rickettsia_bellii     DWVALYQNQLVPIQTRFFICTTLTLILIEASRAFGTGTHTTSGCIEALE
67940209_Chlorobium_phaeob     NWNAEWEANLKPVEIRIMIVQQNILIEINPKMSFGTYHATTRLMLRQIE
34540441_Porphyrionomonas_gingiv  NWNEQWEKNFFPIRIKCLVRAPFLELIISPQMAFGTGHHTTSLMMSYLL
108866182_Aedes_aegypti       NWNEEWEKNFQPINVKVLIIRAEFEEIIIQPKMSFGTGHHTTYLMIQMM
RAO00324465_Reclinomonas_ameri  WNWALWESSFEPVIVFAAVRAHFQEIITPRMSFGTGHHTTMMIRSME
78777868_Thiomicrospira_denitr  DWVKVYQDSIEPLRIKFYIHPWINIAIDPALAFGTGHHTTASALRAIA
33240884_Prochlorococcus_marin  DWSSSWKFKWADPVKILILPSWIVIKLDPGSAFGTGHHTTCLLEDLE
77464128_Rhodobacter_sphaer    DWVAKVRELSPEARFFVYGSIALQIEATVAFGTGHHTTLGCLRALD

```



|                                |                                           |
|--------------------------------|-------------------------------------------|
| 83746797_Ralstonia_solana      | LSNPLKLMAMLCARVRPGGRLVLSGVLERQAEVAAAY     |
| 15607057_Aquifex_aeolic        | EIHIFERVLKDILPKFKKIG--IFSGLYKEKDLKRFEEL   |
| 46198605_Thermus_thermo        | YAEHHAALALRYREALVPGGRALLTGILKDRAPLVREAM   |
| 94984946_Deinococcus_geothe    | YAEHLDLLAGEYAAHLVPGGALILTGILTVKPLVHAAL    |
| 15924568_Staphylococcus_aureus | LAHIIDEMIEDAYNTLNEGQYFITSGLIKEYEYEQSHM    |
| 67873260_Clostridium_thermo    | IANVIMDISSRVYYLKKDGLFIASGIIKERKQEVLDDEC   |
| 30022391_Bacillus_cereus       | LAEIILLFPEDAARVVKSGGLFITSGLIIAAKEKVISSEAL |
| 76258363_Chloroflexus_aurant   | IAKVLVLLAPDLATALKPGGLLISSGIIIDVKEAEVVAAF  |
| 88936160_Geobacter_uraniu      | LAEEELVRLAPELVDRTPAGGYLVLSGILTEKEEFVINGF  |

**Note:** The identifiable homologs of this gene (using *Cyanidioschyzon* and *Arabidopsis* sequences as queries) are found only in bacteria and eukaryotes, with all top hits being from beta and gamma-proteobacteria. This disjunct distribution suggests that the eukaryotic sequences are likely of bacterial origin. Phylogenetic analyses show a common ancestry of sequences from red algae, green plants and gamma, beta-proteobacteria. The gene was likely transferred independently to two groups of eukaryotes, one to the ancestor of red algae and green plants, another to the bacteriotrophic *Reclinomonas*. *Reclinomonas* and *Aedes* share several conserved residues and their grouping together likely resulted from eukaryote-to-eukaryote gene transfer. The *Arabidopsis* gene product is localized in cytoplasm according to GenBank annotation. Sequence of *Reclinomonas* was obtained from TBestDB.

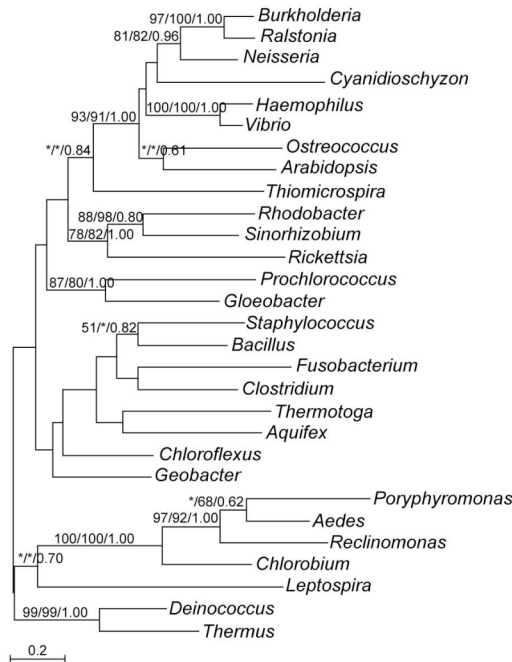

**Figure 18.** Molecular phylogeny of ribosomal protein L11 methyltransferase. P-value = 0.959 from AU test for the presented gene tree. AU tests were also performed on alternative topologies including (A) monophyly of all eukaryotic sequences, and (B) monophyly of red algal, green plant, and cyanobacterial sequences. P-value < 0.001 from AU tests for topology A and p-value = 0.041 for topology B.

## 19. GTP binding protein *typA* (D)

CLUSTAL X (1.83.1) multiple sequence alignment

34762648\_Fusobacterium\_nuclea  
28210762\_Clostridium\_tetani  
6458935\_Deinococcus\_radiod  
51892172\_Symbiobacterium\_therm  
67920868\_Crocospaera\_watsonii  
16329356\_Synechocystis\_sp.  
33861319\_Prochlorococcus\_marin  
69247248\_Enterococcus\_faecium  
16078541\_Bacillus\_subtil  
21674245\_Chlorobium\_tepidu  
57169035\_Campylobacter\_coli  
15611499\_Helicobacter\_pylori  
45658203\_Leptospira\_interr  
39995607\_Geobacter\_sulfur  
24375888\_Shewanella\_oneide  
16272804\_Haemophilus\_influe  
59801217\_Neisseria\_gonorr  
30250473\_Nitrosomonas\_europa  
32474280\_Rhodopirellula\_baltic  
53715742\_Bacteroides\_fragil  
48854524\_Cytophaga\_hutchi  
91201932\_Candidatus\_Kuenenia  
30684514\_Arabidopsis\_thalia  
30684509\_Arabidopsis\_thalia  
50906979\_Oryza\_sativa  
CM3614\_Cyanidioschyzon\_merolae  
106888453\_Roseiflexus\_sp.  
53795725\_Chloroflexus\_aurant  
113940020\_Herpetosiphon\_aurant  
15608305\_Mycobacterium\_tuberc  
94971430\_Acidobacteria\_bacteri  
46446750\_Protoclamydia\_amoeb  
89284086\_Tetrahymena\_thermoph  
42733852\_Dictyostelium\_discoi  
34909598\_Oryza\_sativa  
79323586\_Arabidopsis\_thalia  
15889919\_Arabobacterium\_tumefa  
51473460\_Rickettsia\_typhi  
56696900\_Silicibacter\_pomeroy  
23612528\_Plasmodium\_falcip

IKNIAIAHVHDHGKTTLVDCLLRQGGVFKTHEERVMSDDIERERGITIF  
IRNIAIAHVHDHGKTTLVDAMLKESHVFRENEERVMSNDLERERGITIL  
YRNIAIAHVHDHGKTTLVGDLLKQTLKLGHEERAMDSNDLERERGITIL  
LRNVAIAHVHDHGKTTLVGDLLRQSGTFRANEERVMSFDLERERGITIL  
IRNVAIAHVHDHGKTTLVDSLKQSGIFREGEVCVMSNTLERERGITIL  
IRNVAIAHVHDHGKTTLVDAKQSGIFREGEVCVMSNDLERERGITIL  
IRNVAIAHVHDHGKTTLVDAKQSGIFRDNETCVMSNDLERERGITIL  
IRNVAIAHVHDHGKTTLVDELLKQSDTLDAHTERAMDSNALEKERGITIL  
LRNIAIAHVHDHGKTTLVQDLHQAGTFRANEERAMDSNDLERERGITIL  
IRNIAIAHVHDHGKTTLVDSIFKQTGAFFRENQVRVMSNPQERERGITIF  
IRNIAIAHVHDHGKTTMVDKLLKQSGTFSEREERVMSNDIEKERGITIL  
IRNIAIAHVHDHGKTTLVGDLLKQSGTFSEREERVMSNDLEKERGITIL  
IRNIAIAHVHDHGKTTLLDGLRQTGAFTAKEERIMDSNDLEKEKGITIK  
IRNIAIAHVHDHGKTTLVDAMLKHAGVFRENEERVMSNDLEKERGITIL  
LRNIAIAHVHDHGKTTLVKLLKQSGTFRATRGERVMSNDLERERGITIL  
LRNIAIAHVHDHGKTTLVKLLKQSGTFESARERVMSNDLEKERGITIL  
IRNIAIAHVHDHGKTTLVQDLRQSGTFRANQERVMSNDLEKERGITIL  
LRNIAIAHVHDHGKTTMVDKLLHQAGTFAAHQERVMSNDLERERGITIF  
IRNVVIAHVHDHGKTTLVDCLLRQSGQYRDAEERILDSNDIEKERGITIL  
IRNIAIAHVHDHGKTTLVKMLLAGNLFGRNQELILDNDLERERGITIL  
IRNIAIAHVHDHGKTTLVDKIIHASKIFRENQDLILDNDQERERGITIL  
VRNVAIAHVHDHGKTTLVQDLKQSGTFRVNRQERIMDSNDLERERGITIL  
VRNIAIAHVHDHGKTTLVDSMLRQAKVFRDNQERIMDSNDLERERGITIL  
VRNIAIAHVHDHGKTTLVDSMLRQAKVFRDNQERIMDSNDLERERGITIL  
VRNIAIAHVHDHGKTTLVDSMLRQAKVFRDNQERIMDSNDLERERGITIL  
VNIATCAHVHDHGKTTLVDAKLLHAKVFRNQSLVMSNDLERERGITIL  
IRNIAIAHVHDHGKTTLVGDLLRQGRIFRDNQERVLSNDLERERGITIM  
LRNIAIAHVHDHGKTTLVDAMLKQSRIFRDNQERVLSNALEKERGITIL  
LRNIAIAHVHDHGKTTLVDAMLKQSRIFRDNQERVMSNAIERERGITIM  
FRNVAIAHVHDHGKTTLVDAMLRQSGALRERGERVMDTGDLEKRGITIL  
LRNIAIAHVHDHGKTTLVDAMLKQSGTFRANEDRVMSNLEKERGITIL  
IRNIAIAHVHDHGKTTLLDALKQSKIFRDNQERVMSYDQEQERGITIF  
FRNVAIAHVHDHGKTTLVDTLLKTSG-----DKSMDSNQLQEKESNNR  
IRNVAIAHVHDHGKTTSLVDQLLRQSGAIKAT-ERVMSNALEKERGITIM  
IRNVAVIAHVHDHGKTTLMDRLLRQCGAD----ERAMDSISLERERGITIA  
LRNVAVIAHVHDHGKTTLMDRLLRQCGAD----ERAMDSINLERERGITIS  
LRNIAIAHVHDHGKTTLVDELLKQSGSFRDNQERVMSNDLEKERGITIL  
IRNIAIAHVHDHGKTTLVDNMLKQSGTFRANQERAMDSNLEKERGITIL  
LRNIAIAHVHDHGKTTLVDELLKQSGAFRENQERAMDSNDLERERGITIL  
IRNVAIAHVHDHGKTTLVKLLRQGGEITNN-DRIMDHNDLEKERGITIM  
\*:.: \*\*:\*:\*\*\*\*\*:.\*: .

34762648\_Fusobacterium\_nuclea  
28210762\_Clostridium\_tetani  
6458935\_Deinococcus\_radiod  
51892172\_Symbiobacterium\_therm  
67920868\_Crocospaera\_watsonii  
16329356\_Synechocystis\_sp.  
33861319\_Prochlorococcus\_marin  
69247248\_Enterococcus\_faecium  
16078541\_Bacillus\_subtil  
21674245\_Chlorobium\_tepidu  
57169035\_Campylobacter\_coli  
15611499\_Helicobacter\_pylori  
45658203\_Leptospira\_interr  
39995607\_Geobacter\_sulfur  
24375888\_Shewanella\_oneide  
16272804\_Haemophilus\_influe  
59801217\_Neisseria\_gonorr  
30250473\_Nitrosomonas\_europa  
32474280\_Rhodopirellula\_baltic  
53715742\_Bacteroides\_fragil  
48854524\_Cytophaga\_hutchi  
91201932\_Candidatus\_Kuenenia  
30684514\_Arabidopsis\_thalia  
30684509\_Arabidopsis\_thalia  
50906979\_Oryza\_sativa  
CM3614\_Cyanidioschyzon\_merolae  
106888453\_Roseiflexus\_sp.  
53795725\_Chloroflexus\_aurant  
113940020\_Herpetosiphon\_aurant  
15608305\_Mycobacterium\_tuberc  
94971430\_Acidobacteria\_bacteri

SKNASVRYKDYKINIVDTPGHADFGGEVQRIMKMVDSVLLLVDAFEGPMP  
SKNTSMVYDGVKINIIDTPGHADFGGEVERVLKMOVDSVLLLVDSYEGPMP  
AKNTAVEYNGVKINIVDTPGHADFGGEVERVLGMVDGALVLVDAEAGPMP  
SKNTGITYKGVKINIVDTPGHADFGGEVERIMTMVDCGLLIVDAAEGPMA  
SKNTAVRYNDTLINIVDTPGHADFGGEVERVLGMVDGCVLIVDANEGPMP  
SKNTAVRYQDTLINIVDTPGHADFGGEVERVLGMVDGCVLIVDANEGPMP  
SKNTAVNYKNTKINIIDTPGHADFGGEVERVLGMVDGCVLIVDANEGPMP  
AKNTAVDYKGVKINIVDTPGHADFGGEVERIMKMVDGVVLLVDAVEGTMP  
AKNTAINYKDTKINILIDTPGHADFGGEVERIMKMVDGVVLLVDAVEGCM  
SKNAAVQHKGKINIVDTPGHADFGGEVERILKMOVDSVLLLVDAFEGPMP  
SKNTAINYKGTKINIIDTPGHADFGGEVERVLKMGIDGVLLLVDAQEGVMP  
SKNTAIYKDTKINIIDTPGHADFGGEVERVLKMOVDSVLLLVDAQEGVMP  
AKNTAVVYKGTTRINIVDTPGHADFGGEVERVLATADSCLLLVDAFDGMP  
AKNLSVHHGRVGINIVDTPGHADFGGEVERVLKMOVDSVLLLVDAFDGMP  
AKNTAIKWNDRINIVDTPGHADFGGEVERVLSMVDSVLLLVDAVDGMP  
AKNTAINWNYDRINIVDTPGHADFGGEVERVLSMVDSVLLLVDAFDGMP  
AKNTAIDYEGCHINIVDTPGHADFGGEVERVLGMVDCVLLLVDAQEGPMP  
SKNCAIDYAGVHINIVDTPGHADFGGEVERVLSMVDSVLLLVDAVEGMP  
SKNIAVHYRGVKNILIDTPGHADFGGEVERVQMGALVLVDAEAGPMP  
SKNVSINYNGTKINIIDTPGHSDFGGEVERVLSMADGCILLVDAFEGPMP  
AKNVSIRYKEHKINIIDTPGHADFGGEVERVLKMGIDGVLLLVDAFEGMP  
AKNTAINYKGVKINIIDTPGHADFGGEVERVLSMADGCILLVDAEAGVMP  
SKNTSITYKNTKVINIIDTPGHSDFGGEVERVLSMADGVLLLVDSVEGPMP  
SKNTSITYKNTKVINIIDTPGHSDFGGEVERVLSMADGVLLLVDSVEGPMP  
SKNTAVVYRGVGINIVDTPGHADFGGEVQRVLSMADAMLLVDSVEGPRP  
AKNTAVTYRGVGINIVDTPGHADFGGEVERVLSMADGVLLLVDAVEGMP  
AKNTAVNYRGVGINIVDTPGHADFGGEVERVLSMADGVLLLVDAVEGMP  
AKNTAVEYNGVGINIVDTPGHADFGGEVERVLSMADGVLLLVDAVEGMP  
AKNTAVHRHHPDINIVDTPGHADFGGEVERVLSMADGVLLLVDAVEGMP  
AKNTAVFYHDIKINIVDTPGHSDFGGEVERALKMOVDSVLLLVDAVEGMP



46446750\_Protochlamydia\_amoebo  
89284086\_Tetrahymena\_thermoph  
42733852\_Dictyostelium\_discoi  
34909598\_Oryza\_sativa  
79323586\_Arabidopsis\_thalia  
15889919\_Agrobacterium\_tumefa  
51473460\_Rickettsia\_typhi  
56696900\_Silicibacter\_pomeroy  
23612528\_Plasmodium\_falcip

AKHTSVYFDDFKINIIDTPGHADFSGEVERILGMVDSVLLLVDAQEGPMP  
SKVTGVTFKDYKINIVDTPGHDFGGEVERIMSMVDGVILLVCATEGPMT  
AKCTSFYKHNHKLNIIVDTPGHGDFGGEVERVLSMVDGVLLVDATEGPM  
SKVTSVSWKENELNMVDTPGHADFGGEVERVVMVEGAVLVVDAGEGPLA  
SKVTSIFWKDNEELNMVDTPGHADFGGEVERVVMVEGAILVVDAGEGPLA  
AKATSVEWKGVRINIVDTPGHADFGGEVERILSMVDGAIIVLVDSSGEPMP  
AKCTALMWEIRINIVDTPGHADFGGEVERILSMVDGVLLVDASEGPM  
AKATSVEWRGTRVNIIVDTPGHADFGGEVERILSMVDGVLLVDAEAGPMP  
SKVTRIKYDDYFNIVDTPGHSDFGGEVERVNLIDGVCLIIDVVEGPKN  
:\* . .\*:\*\*\*\*\* \*\*:\*\*\*:\* : : : : :\*

34762648\_Fusobacterium\_nuclea  
28210762\_Clostridium\_tetani  
6458935\_Deinococcus\_radiod  
51892172\_Symbiobacterium\_therm  
67920868\_Crocospaera\_watsonii  
16329356\_Synechocystis\_sp.  
33861319\_Prochlorococcus\_marin  
69247248\_Enterococcus\_faecium  
16078541\_Bacillus\_subtil  
21674245\_Chlorobium\_tepidu  
57169035\_Campylobacter\_coli  
15611499\_Helicobacter\_pylori  
45658203\_Leptospira\_interr  
39995607\_Geobacter\_sulfur  
24375888\_Shewanella\_oneide  
16272804\_Haemophilus\_influe  
59801217\_Neisseria\_gonorr  
30250473\_Nitrosomonas\_europa  
32474280\_Rhodopirellula\_baltic  
53715742\_Bacteroides\_fragil  
48854524\_Cytophaga\_hutchi  
91201932\_Candidatus\_Kuenenia  
30684514\_Arabidopsis\_thalia  
30684509\_Arabidopsis\_thalia  
50906979\_Oryza\_sativa  
CM3614\_Cyanidioschyzon\_merolae  
106888453\_Roseiflexus\_sp.  
53795725\_Chloroflexus\_aurant  
113940020\_Herpetosiphon\_aurant  
15608305\_Mycobacterium\_tuberc  
94971430\_Acidobacteria\_bacteri  
46446750\_Protochlamydia\_amoebo  
89284086\_Tetrahymena\_thermoph  
42733852\_Dictyostelium\_discoi  
34909598\_Oryza\_sativa  
79323586\_Arabidopsis\_thalia  
15889919\_Agrobacterium\_tumefa  
51473460\_Rickettsia\_typhi  
56696900\_Silicibacter\_pomeroy  
23612528\_Plasmodium\_falcip

QTKYVLKKALEQGHRIVVVNKVDKPNARPEVLYMVYDLFIELNANEYO  
QTKFVLKKALELDLKP I V V N K I D R P D A R A E D V L D E I F D L F V E L G A S D D Q  
Q T R F V L K K A I E L G L K P I V V N K I D R N D A R P E E V V N L T F D L M A E L G A N D D Q  
Q T K F V L R K A M E A G L K P V V V I N K I D R P D R R I A E V E D E V L D L F I E L G A D D Q  
Q T R F V L K K A L E K L R P I V V V N K I D R P Q A E P D Q A V D K V F D L F I E L G A D D Q  
Q T R F V L K K A L E K L R P L V V V N K I D R P R A D P N T A V D K V F D L F V E L G A D D Q  
Q T R F V L K K A L E K L R P I V V N K I D R P R V V P E I A V D K V L D L F E L G A D D Q  
Q T R F V L K K A L E Q H I T P I V V V N K I D K P S A R P E H V V D E V L E L F I E L G A D D Q  
Q T R F V L K K A L E Q N L N P V V V N K I D R D F A R P E V I D E V L D L F I E L D A N E E Q  
Q T K F V L R K A L E L H L K P I V V I N K I D R P Q A D P E K V H D Q V L D L F I A L G A D E Q  
Q T K F V V K K A L S L G L K P I V V I N K I D K P A A D P E R V I N E I F D L F V N L G A N D E Q  
Q T K F V V K K A L S F G I C P I V V V N K I D K P A A E P D R V V D E V D L F V A M G A S D K Q  
Q T R F V L K S L Q L G H R P I L V I N K I D R P G A R P E A V V D M A F D L F S D L G A T D E Q  
Q T R F V L K K S L D L G L K P I V V I N K I D R P G S R P D E V V D M V F D L F C E L N A T D E Q  
Q T R F V T K A L S Q G L K P I V V I N K I D R P G A R P D W V I D Q V F D L F V N L G A D D Q  
Q T R F V T Q K A F A H G L K P I V V I N K V D R P G A R P D W V V D Q V F D L F V N L G A S D E Q  
Q T R F V T K A L A L G L K P I V V I N K I D K P S A R P S W V I D Q T F E L F D N L G A T D E Q  
Q T R F V T R K A L A S G L R P I V V V N K I D R P G A R P D W V V N Q T F D L F D K L N A T E E Q  
Q T R F V L E K A L Q A G V K P I V V V N K V D R P D R P P E A L D E A L E L L A D L G G E E Q L  
Q T R F V L Q K A L E I G L K P I V V I N K V D K P N C R P D E V H E M V F D L M F S L D A T E E Q  
Q T R F V L S K A L G L G L K P I L I V N K V D K E N C R P D E V H E V F D L M F N L G A N E H Q  
Q T R F V L R K A L G Y N L N P L V V I N K I D R P D A R C Q D V I N E V F D L F V D L D A N D E Q  
Q T R F V L K K A L E F G H A V V V V N K I D R P S A R P E F V V N S T F E L F I E L N A T D E Q  
Q T R F V L K K A L E F G H A V V V V N K I D R P S A R P E F V V N S T F E L F I E L N A T D E Q  
Q T R F V L K K A L E F G H A V V V V N K I D R P T A R P E F V V N S T F E L F I E L N A T D E Q  
Q T R F V L K K A L E F G H A V V V V N K I D R P A A R P V F V V N K T F D L F V L D L G A S D E Q  
Q T R F V L R K A L Q A G H R A I V V V N K I D R P N A R P N H V V N E T F D L F I E L G A T D E Q  
Q T K F V L R K A L Q A G H H A I V V V N K I D R P Q A R P N H V V N E T F D L F V D L G A T D E Q  
Q T K F V L R K A L E Q G H R A I V V V N K V D R P S A R P N Y V V N E T F D L F I D L G A T E E Q  
Q T R F V L R K A L A A H L P V I L V V N K T D R P D A R I A E V V D A S H D L L D V A A E H A  
Q T R Y V L G K A L E A N L P P I V V I N K I D R P D A R A Q E V L N E I Y D L F I D L D A K E E Q  
Q T R F V L S K S L K M G I K P I V V L N K I D R P H A N P D R V L D L T F D L F S E L G A T D E Q  
Q T K F V L K K A L Q G L K P I V I N K V D R P T A R V K E V E S E V L D M F I E M E V N E D L  
Q T K F V L R K A L S Q G L R P I V V I N K L D R S T A R V D E V E N E I F D L F A T L G A S D E Q  
Q T K F V L S K A L K Y G L R P I L L L N K V D R P E E T C N E V E S L V F D L F A N L G A T E E Q  
Q T K F V L A K A L K Y G L R P I L L L N K V D R P E E R C D E V E S L V F D L F A N C G A T E E Q  
Q T K F V V S K A L K Y G L R P I V A I N K I D R P D G R H E E V I N E V F D L F A N L D A T D E Q  
Q T K F V L K A L N L G L K P I V V I N K I D R D D Q R I K E V I D E V F L E V A L E A N N D Q  
Q T K F V T S K A L A L G L R P I V V L N K V D K P A E P D R A L D E C F D L F A N L G A N D E Q  
Q T K F V L K S L L N P C K I I V I M N K F D K P M K K E E I E N E I F D L F V D L N A P E E S  
\*\*:\* : : : : \* \* \* : : : :

34762648\_Fusobacterium\_nuclea  
28210762\_Clostridium\_tetani  
6458935\_Deinococcus\_radiod  
51892172\_Symbiobacterium\_therm  
67920868\_Crocospaera\_watsonii  
16329356\_Synechocystis\_sp.  
33861319\_Prochlorococcus\_marin  
69247248\_Enterococcus\_faecium  
16078541\_Bacillus\_subtil  
21674245\_Chlorobium\_tepidu  
57169035\_Campylobacter\_coli  
15611499\_Helicobacter\_pylori  
45658203\_Leptospira\_interr  
39995607\_Geobacter\_sulfur  
24375888\_Shewanella\_oneide  
16272804\_Haemophilus\_influe  
59801217\_Neisseria\_gonorr  
30250473\_Nitrosomonas\_europa  
32474280\_Rhodopirellula\_baltic  
53715742\_Bacteroides\_fragil

LEFPVVIYASGKSGFARKELDMQPLFETILEHVQDPDVTKPTQFLITNIAY  
LDFFPVVYASARSIGAKKQLNMIPLFDTI IKNVKAPYIDKPPQILITIDS  
LDFFPVVYAIAREGKAFKDLDFKELFDMVLEHI PAPDLDSPFQMLVGNLDY  
LDYFPVLYASARKGVATYRLDLQPIFDITILERIPCPDPDAPLQAMVTSLDY  
CDFTTLYASGLSGFAKDNLDKPLFEAILHHVPPPPVSKPLQLQVTTLDY  
CDFTTLYASGLSGFAKESLDMKPLFEAILHHVPPPPDNKPLQLQVTTLDY  
CDFPVLFGSGLSGFAKEEMNMPLFEAILRHVPPPPDLNKLPLQIITLDY  
LDFFPVVIYASALNGTSSLSDTMAPIFDTI IEKIPAPNSDEPLQFQVSLLDY  
LEFPVVIYASALNGTASLDPNMEALYETI IKHVPAPNAEPELQFQVALLDY  
LDFFPYIFASAKNGIAKCNMDSLLDLMIVKEIPAPDDAGFQMLVTSLDY  
LDFAIVYAAAKNGYAKLDLNMPLFKITILERVAPPTNDNKLPLQLQVFTLGY  
LDFFPVVYAAARDGYAMKSLNLEPLFETILEHVSPSPVDEPLQMIFTLDY  
LDFFPIVYASAKQGWAVHNLDLPLDVTLVKHHVPPVDTAPLQFQVTSLDY  
LDFFPIVYTSAKLGFAKLDLSMEPLFAVIESNVHPDPSKAPFQLLVNIDY  
LDFFPIVYASALNGFATLDPMTPLFQTIVEKVVSPDADGPPQMQISLDY  
LDFFPIIYASALNGVAGLEHDMTPLFEAIVKHVEPELDAPFQMQISLDY  
LDFFPIVYASGLSGFAKLEEDMRPLFDITILKYTPAPSADPELQQLQISLDY  
LDFFPVVYASALNGYATLDADMPLFDMLIKHVPAPDPDQPLQLQISALDY  
DSAAVYFASAKEGYATDDPMRPLDLLVDHLPDGPDTKSDFQMMVTTLDW  
LDFFPTIYGSAKNWMSTDWSIVPLLDLDCIVENIP-AQLEGTPOMLITSLDY

48854524\_Cytophaga\_hutchi  
91201932\_Candidatus\_Kuenenia  
30684514\_Arabidopsis\_thalia  
30684509\_Arabidopsis\_thalia  
50906979\_Oryza\_sativa  
CM3614\_Cyanidioschyzon\_merolae  
106888453\_Roseiflexus\_sp.  
53795725\_Chloroflexus\_aurant  
113940020\_Herpetosiphon\_aurant  
15608305\_Mycobacterium\_tuberc  
94971430\_Acidobacteria\_bacteri  
46446750\_Proteochlamydia\_amoebo  
89284086\_Tetrahymena\_thermoph  
42733852\_Dictyostelium\_discoi  
34909598\_Oryza\_sativa  
79323586\_Arabidopsis\_thalia  
15889919\_Agrobacterium\_tumefa  
51473460\_Rickettsia\_typhi  
56696900\_Silicibacter\_pomeroy  
23612528\_Plasmodium\_falcip

LDFVTLVYSGRGGWMTDWDIIPLLDIAVDHIP-PVHEGIPQMQITSLDY  
LDFKIVYASGRNGYAKLSLDIRPLLDIAIQFVVKPDAEFPLQMQIASLDY  
CDFQAIYASGKIGKAGLSPDLGPLFEAIIRCVPGPKEKDGALQMLATNIEY  
CDFQAIYASGKIGKAGLSPDLGPLFEAIIRCVPGPKEKDGALQMLATNIEY  
CDFQTVYASGKIGKAGLSPDLGPLFEAILRCLPEPEKDGALQLLVSNTEY  
ADFPVVYASALKRVAGYAPDMGPLFEEILR-LPRPALDAPLQLLVSNISS  
AEFATIYTNALKGAVGRSPSLEPLFDAILDQIPAPDPDGPALQVLTNTVY  
AEFATIYTNALLGHAGRSPSLEPLFECILDRIPPPDVEGVPQFLVTTSSY  
AEFPVIVYASGIAGTAGHDPSTLPLFETILQVVPAPDAHGPPQLLVSTMY  
LGLPTLYASGRAGVASTANLDPLFEVLEKHPPEPDAPLQALVTLNDA  
LEFPVLYTNAKIGTASTDADLQPLFEAIVKTI PPPKTDGPLQVLVANLDY  
LDFRYCYASGLSGFAMHHMDMRPLFELITYAVQQPSLENPFMLHVSTITY  
LDYPVVYASGREGWAVPSIGVACVMDAIVSHVYPQVEGDFQMLISQTES  
LNYPITYASGRQGWAI RSRDILPLLDITVEYVECPKPEEPFTMLVTNLES  
LDFPVLYASAKEGWASLEFNMSALDLSILQHVSPDLEAPFQMLVSMMER  
LDFPVLYASAKEGWASSTYNMADLLDAVVRHVQPPNLEDFPMLVSMMEK  
LDFPILYSGRDRGMMNVPGLAPLLDLVLEHVPEPE-EGPFRLLIGTILEA  
LDFPILYASGRAGTASLNFNLSPFLNLI VTHVPTPDNKAPFSLMVTREY  
LDFPHLYASGRSGWADTDLDTALFELVVRHV PPRKDEPFRLATTLGS  
MNPYILYASAKNGWCTDNFDVLVIFKKIIEYIDSPILKEPFCMLVSLIDH

: . : :

34762648\_Fusobacterium\_nuclea  
28210762\_Clostridium\_tetani  
6458935\_Deinococcus\_radiod  
51892172\_Symbiobacterium\_therm  
67920868\_Crocospaera\_watsonii  
16329356\_Synechocystis\_sp.  
33861319\_Prochlorococcus\_marin  
69247248\_Enterococcus\_faecium  
16078541\_Bacillus\_subtil  
21674245\_Chlorobium\_tepidu  
51769035\_Campylobacter\_coli  
15611499\_Helicobacter\_pylori  
45658203\_Leptospira\_interr  
39995607\_Geobacter\_sulfur  
24375888\_Shewanella\_oneide  
16272804\_Haemophilus\_influe  
59801217\_Neisseria\_gonorr  
30250473\_Nitrosomonas\_europa  
32474280\_Rhodopirellula\_baltic  
53715742\_Bacteroides\_fragil  
48854524\_Cytophaga\_hutchi  
91201932\_Candidatus\_Kuenenia  
30684514\_Arabidopsis\_thalia  
30684509\_Arabidopsis\_thalia  
50906979\_Oryza\_sativa  
CM3614\_Cyanidioschyzon\_merolae  
106888453\_Roseiflexus\_sp.  
53795725\_Chloroflexus\_aurant  
113940020\_Herpetosiphon\_aurant  
15608305\_Mycobacterium\_tuberc  
94971430\_Acidobacteria\_bacteri  
46446750\_Proteochlamydia\_amoebo  
89284086\_Tetrahymena\_thermoph  
42733852\_Dictyostelium\_discoi  
34909598\_Oryza\_sativa  
79323586\_Arabidopsis\_thalia  
15889919\_Agrobacterium\_tumefa  
51473460\_Rickettsia\_typhi  
56696900\_Silicibacter\_pomeroy  
23612528\_Plasmodium\_falcip

DNYVVGKLA VGRIGHNGTLKRNQDVMLIKRDGKQKVS VLYGYEGLKRVEIEE  
NEYVGRIGVGVKVERGVVKNRQQAALMRKDGKIKISKLYTYSGLQRETEE  
SEYLGRIVLRVARGTVKKGEFVQLMHKDGTRMVRVQPFTHLGLKRIVEDE  
DEYVGRVIAIRVRQGTVRAGQVAVAKLDGVSRAAQLFGFGLKRVPEVE  
SEYLGRI MGRIGHNGTLKAGQQAALMKEDGTIKISKLLGFEGLRVELEE  
SDYLGRIIIGRHNHTVKAGQQAALVKEDGSIKVS KLLGFEGLRNRIELPE  
SDFLGRIVIGKIHNGTIKNGQQAALIKESGKTKVSKLLGFEGLRIDINE  
NDYVGRIGRIVFRGTIKVGDQVALIKLDGTVRVTKLF GFFGLKRLIEIQE  
NDYVGRIGRIVFRGTMKVGQVSLMKLDGTARVTKIFGFQGLKRVEIEE  
SDYIGKIAIGRIQRGVAPGNQLTLVTQDGVVTVTKLFLDRTORVEAME  
DNFVGIKIGIARI FNGVVKKNQSVMLAKADGTRKISKLIGFMGLEKMDIE  
DNYVGIKIGIARVFNNGSVKKNESVLLMKSDGSKRITKLI GFLGLARTEIEN  
NDYVGRIVAVGKIYAGKMALGMNVIQLAAKKTERTKLYNFEGLRKNEVNT  
NDYIGRIATGRIFNGRVKA GETVALVRRDGSIRITKLLGYEGLKQVEIPE  
NSYVGVIGVGRINRGSIKTNQVSVIGADGKVMGQVLYMGLRVEVDV  
NNYVGVIGIGRIKRSIKPNQPVTTIINSEGKTRIGQVGLHGLQRYEEDV  
DNYTGRIGIGRILNRIKPGQTVAVMNHQQIRINQLLGFGLERVPLEE  
SSFVGRIGIGRINRGLKPGQVEVMVLTGERAPRVNQS GFRGLDRIQLSE  
SEYVGRIVAVGRVNA GTIQTGQAVDVHTIDSSGKASGLYVDFGLKRVPAES  
SSYTGRIAVGRVHRGTLKEGMNVS LAKRDGSIKIKEVHVFEGLGRVKTTE  
STFTGRIAGRIVFRGELKEGGQYSLTKMDGSIKIKELHSFEGLGRVRES  
NDYVGRIGIGRIFSGTITTTGQVVRIDKTKGQKITDLFAFVGLSREKTL  
DEHKGRITAI GRILHAGVLRKGM DVVCTSEDS CRVSELFVYEFYRVP TDS  
DEHKGRITAI GRILHAGVLRKGM DVVCTSEDS CRVSELFVYEFYRVP TDS  
DEHKGRITAI GRILHAGELQRGM EVKVT PDDACKISELFVYQNF SRVVDN  
DDYKGLIGIGRIHAGTLRKGATVRVGT PAKDERVDEVFLFENLGRVSAES  
DDYKGLIIGRILRRGVL RKGQMAAR IARDG SVKIGQLFVFNRAEVEE  
DEYKGIKIL TGRVLRGTIRKGGQLVRIARDGTIKVSQIFVYNGLERQVEEQ  
DDYKGI IIGRLNSGTIRKGGQVAHIAAGKDPKVQVVFTHYGMERVEVDE  
STFLGRITAIIRIYNGRIKGGQVAVIRQVDGQKITELLATEGVRKPTDA  
SDYLGRIAIARVFNGLTFTGEDVV-IAKLDGSKITKLF SFSGLKRV DITE  
DDYVGRQACGKILEGT VKKGQQLIHIDENG VETITRIEGLHGLEKVEEMEE  
NQYHGK MVIKILRGLNVGDKLTSVDSSGNLKMVKIVRRYGMKQMEINT  
DPFVGRIVTGKIYSGKAKVGPPLRVVDMKGNVKITKIFCRRAMERIVLEE  
DFYLGRILTGRVRSVVVRVGDKVHGLRSTDDGQVVKMLKKGTS MVIVEA  
DFYLGRIILTGRVTS GVVVRVGDVNRVGLRKTDSG-VVKMLKKGTTIVSIDA  
NPFLLGRIITGRIASGSIKPNQAVKVLGQDGKLRISKILAFRGIERTAEIE  
NPFVGRVLTGRIQSGTVKINQNVKVLNHNENKVRITKILAFRGLERIAIDH  
DPFIFGRILTGRVESGTLKAGETL KALS RDGTQRASKILAFRGLGQQPIDV  
QEGIGVITTKGIFKGVIKKGD SIVVKTEENKLI IKNIFYMKGLKLIENVPF  
. \* : : \*

34762648\_Fusobacterium\_nuclea  
28210762\_Clostridium\_tetani  
6458935\_Deinococcus\_radiod  
51892172\_Symbiobacterium\_therm  
67920868\_Crocospaera\_watsonii  
16329356\_Synechocystis\_sp.  
33861319\_Prochlorococcus\_marin  
69247248\_Enterococcus\_faecium  
16078541\_Bacillus\_subtil

AEAGDIVCVAGIDDDIDIGETLADINEPVALPLIDIDEPTLAMTFMVNDSP  
AKIGDIVAVAGIDDDINIGETLADIQNPEALPFVEIDEPTLTMNFMVNDSP  
VGAGDIVALAGIEDAQIGETIADLAEPALPIITVDEPTVSMTFQNTSP  
ATVGDIIAMTGLEVDNIGETITDPENPQLPPIKVDEPTLQMTFRFNDSP  
SNAGNIVAVAGFADANIGETLTCPEPQALPLIKVDEPTLQMTFVNDSP  
ASAGYIVAVAGFADANIGETLTCPEPQALPLIKVDEPTLQMTFVNDSP  
AFAGDIVAVSGPDDVNIGETIACPDSPHPLIKVDEPTLQMTFVNDSP  
AKAGDLI AVSGMEDIFVGETVTPVDHQDALPLIHIDEPTLQMTFVNDSP  
AKAGDLI AVSGMEDINIVGETVCPVDHQDPLPVLRIIDEPTLQMTFVNDSP



: \* \* : \*\* : : : : : \* \* \* : \* \*

34762648\_Fusobacterium\_nuclea
28210762\_Clostridium\_tetani
6458935\_Deinococcus\_radiod
51892172\_Symbiobacterium\_therm
67920868\_Crocospaera\_watsonii
16329356\_Synechocystis\_sp.
33861319\_Prochlorococcus\_marin
69247248\_Enterococcus\_faecium
16078541\_Bacillus\_subtil
21674245\_Chlorobium\_tepidu
57169035\_Campylobacter\_coli
15611499\_Helicobacter\_pylori
45658203\_Leptospira\_interr
39995607\_Geobacter\_sulfur
24375888\_Shewanella\_oneide
16272804\_Haemophilus\_influe
59801217\_Neisseria\_gonorr
30250473\_Nitrosomonas\_europa
32474280\_Rhodopirellula\_baltic
53715742\_Bacteroides\_fragil
48854524\_Cytophaga\_hutchi
91201932\_Candidatus\_Kuenenia
30684514\_Arabidopsis\_thalia
30684509\_Arabidopsis\_thalia
50906979\_Oryza\_sativa
CM3614\_Cyanidioschyzon\_merolae
106888453\_Roseiflexus\_sp.
53795725\_Chloroflexus\_aurant
113940020\_Herpetosiphon\_aurant
15608305\_Mycobacterium\_tuberc
94971430\_Acidobacteria\_bacteri
46446750\_Protochlamydia\_amoeb
89284086\_Tetrahymena\_thermoph
42733852\_Dictyostelium\_discoi
34909598\_Oryza\_sativa
79323586\_Arabidopsis\_thalia
15889919\_Agrobacterium\_tumefa
51473460\_Rickettsia\_typhi
56696900\_Silicibacter\_pomeroy
23612528\_Plasmodium\_falcip

MRRESFEVQVSKPRVLFKEKGGKLEPIELALIDVDDSYTGVIIEKMGVRK
MRRQGYEFQVSKPSVIFKEEGKKLEPIEYLTDVPEEYMGTVMEKLGPRK
MRRREGYEVQVGSFRVIREIGEKHEPIEHLVIDVPEQHASTVIGVLGARK
MRRREGYELAVSKPKVIYRYDGNRLEPLEELIDVPEEYMGAVMEALGIRK
MRRREGYEFQVAQPQVIYREVGPQYEPFEYLVLDVPEAVGSCIERLGQRK
MRRREGYEFQVAQPQVIYREVGPQCEPVEYLVLDVPEAAVAGACIERLGQR
MRRREGFEFQISQPQVIFREIDVQCEPIETLVLDVPEAVAGSCIEKLGSRK
MRRREGYELQVSRPEVIEKEIGVKCEPFERVDIDTPEEYMGSVIESLSLRK
MRRREGYELQVSKPEVIKEIGVRCEPVERVQIDVPEEHTGSMVSMGARK
MRRREGYELAISRPEVILREEGVTMEPVEHVTIDVPEEYTGVIIEKMGRRK
MRRREGFEFCMGRPEVIVKVEGVKTEPFEHLVIDVPEEFSGAVIEKLGKRR
LRREGFEFISRPEVIEKEEGVKCEPFEHLVIDTPQDFSGAIERLGKRRK
MRRREGFIEQVSRPEVILKTNQKLEPYEYLVMDVDPDQFTGAI IAEIENRRK
MRRREGFEMAVSKPEVILRVIGTKMEPMEYLVVDVPEFQGAIEKMGPRK
MRRREGYELAVSRPEVILKTIGELCEPFETLTVDVEEHQGTVIEKLGIRK
MRRREGYELAVGKPRVYRDIGQKCEPYENLTVDVPDNDQAVMEELGRRR
MRRREGYELAVSRPKVIREIGEKCEPFEVLTVDIDEANQGVMEALGTRR
MRRREGYELSVGKPRVVFKEIGKKHEPFETLRVEVPTVEMGPMELVGLRR
MRRREGYELQVGPQVQVIYKEIGVKCEPIEELTINVPEEYSSKIDMVTRRK
MRRREGYELQVGPQVLYKEIGKRCEPVEVLVDVPEQETSGKVIELATQRK
MRRREGYELQVSKPKVIFKEIGKRMPEYVVIDVPEKEMEGQAI SLLGARK
MRRREGYEFMVGPPKVINRVDKLEPEYIATVEVPEAHMGPVVELLGRK
MRRREGYEFMVGPPKVINRVDKLEPEYIATVEVPEAHMGPVVELLGRK
MRRREGFEFMIGPPKVINRVDKLEPEYIATVEVPEEYMGSVVELLGRK
MRRREGFEMIVGAPEVIFKMDNTPLEPFDHVEVQIPEEYLVGAVDVALAKRR
MRRREGYEFQVSRPEVIFKEIGVKYEP I EQVELEVAEQYQGAVIELMQRR
MRRREGYEFQVSKPEVIFREAGTRLEPMEVLEEVASEYQGVVVELLGRK
MRRREGYEFQVSKAEVIYKDIGTRHEPYELVEIEVDSYQGSVVELMGLRR
MRRREGFELTVGKPVVTKITGLTLEPFESMTVDCPEEYIGAVTQLMAARK
MRRREGYELMVGKPEIVTKHIGKLVPEIEKLTVDIPETFIGVIEKIGTRK
MRRREGYELFMSISKPRVIEKEVGEKYEPIERVHIEVPPQDYSGTVIEELSRK
MRRREGFEMSLTPPQILFKEIGKQHEPIEKVTIELDPVYSANVIEKLSQRK
MRRREGYEVAVSQPRVVFTKDGNLMPEQEEVTDVDTFEYSGAIIEKLSKRN
MRRREGFELSVSPPKVMYRTDGERLEPIEEVTVVEDEHVGFMETLTHRK
MRRREGFELSVSPPKVMYKTEGQKLEPIEEVTVIEINDEHVLVMEALSHRR
MRRREGFELAVSRPRVVMHKDGTLLPEIEEVVIDVDEHSGVVQKMSERK
MRRREGFELISRPEVLYHTDGNKQEP IEEIQVDVDDYIGVVVKSALRKL
MRRREGFELISRPPQVLFRE-EGQRLEPVEEVTIDVDEYTGAVIEKVTPRR
LRREGYEMTISPNVIYTKDGNLLEPIEYHITIPTSMTSNVIEKLNTRK
: \* \* : \* \* : : : : : \* \* \* : \* \*

34762648\_Fusobacterium\_nuclea
28210762\_Clostridium\_tetani
6458935\_Deinococcus\_radiod
51892172\_Symbiobacterium\_therm
67920868\_Crocospaera\_watsonii
16329356\_Synechocystis\_sp.
33861319\_Prochlorococcus\_marin
69247248\_Enterococcus\_faecium
16078541\_Bacillus\_subtil
21674245\_Chlorobium\_tepidu
57169035\_Campylobacter\_coli
15611499\_Helicobacter\_pylori
45658203\_Leptospira\_interr
39995607\_Geobacter\_sulfur
24375888\_Shewanella\_oneide
16272804\_Haemophilus\_influe
59801217\_Neisseria\_gonorr
30250473\_Nitrosomonas\_europa
32474280\_Rhodopirellula\_baltic
53715742\_Bacteroides\_fragil
48854524\_Cytophaga\_hutchi
91201932\_Candidatus\_Kuenenia
30684514\_Arabidopsis\_thalia
30684509\_Arabidopsis\_thalia
50906979\_Oryza\_sativa
CM3614\_Cyanidioschyzon\_merolae
106888453\_Roseiflexus\_sp.
53795725\_Chloroflexus\_aurant
113940020\_Herpetosiphon\_aurant

AEMVSMVPGYTRLEFKVPARGLIGFRNEFLTDTKGTGILNHSFFDYEEYK
GDMVNMTSAYSRLFRIPARGLIGFRSEFMTDRGNGIMNHFIDGYEYPK
GQMVMNEPQRVRFVFKIPARALFGFRTOFLSMTQEGIMSHIFDGYAPWA
AEMTNMNVNHRLEFIIPARGLVGRSEFLTMTRGEGVMHMHFHGYGYPYR
GEMQDMQTRGTQLEFVVPARGLLGFRGDFIRITRREGIMNHSFLRYPLS
GEMQDMQTSRTQLEFVVPARGLLGFRGDFIRITRREGIMNHSFLRYRMS
AEMKMNQTSRTQLEFVVPARGLLGFRGDFIRITRREGIMNHSFYEYKPKA
GEMQDMQTRGTQIRLFTLTPARGLLGFRGDFIRITRREGIMNHSFQDQYPL
GEMVDMNINQVRLIFVPSRGLIGYSTEFLLSLTRGFGILNHTFDSYQPMQ
AEMTNMSTLMNRLEFEIPTRGLIGYNEFTTDTKGEVMNHSVHFHNYQPYK
AEMKTMAPTQTRLEFEIPARGLIGFRSQFLTDTKGEGVMNHSFLEFRPFS
AEMKAMNPMTRLEFEIPARGLIGYRSEFLTDTKGEGVMNHSFLEFRPFS
GELQLMDAHMTRVEFVIPTRGIIIGFRGFFISETRGEVGMSSRFLRFDVYK
GEMTSLQPMTRVLEFVVPARGLLGFRGELLTETRGTAVMTHTFHDIYAPYK
AEMKDMQLDRVRVDFVIPSRLGIGFQTEFLTATSGTGLIYHSFDHYGPHK
GEVRDMLPDRVRLEIYIIPSRGLIGFRGDFMTMTSGTGLLYSSFSHYDEIK
GELTNMESDRTRLEHYHIPARGLIGFQGEFMTLTRGVGLMSHVFDYAPVK
GDLLDMVTDVRVLDYRIPARGLIGFQSEFMTLTRGTGIMSHVDFEYAPMR
GQLEEMKQRYSLRFLVPSRGLIGLRLNATRGTAI IHRHFSEYRMVE
GEMTMENTRINLEFDMPSRGI IGLRNTVLTASAGEAIMAHRFKEYQPFK
GELLIMEPKLQHFLEFKIPSRGI IGLRNTVLTATFGEAIMTHRFDGYEYPK
GEIVSMKTEYTHFEFKAPSRGLIGLNRLLSSTRGEAVMHNHFYDYEYK
GQMFDMQGVTTFLRYKIPTRGLLGLRNAILTASRGTAI LNTVFDYSYGPWA
GQMFDMQGVTTFLRYKIPTRGLLGLRNAILTASRGTAI LNTVFDYSYGPWA
GQMFDMQGVTTFLRYKIPTRGLLGLRNAILTASRGTAI LNTVFDYSYGPWA
GEMLNLTSHSYLVEYIVPTRGLFGLNALLTLTRGTAI IHTSFAAYRPPY
GQMRDMSIRLVHMHIFHVPTRGLLGLRQFLTLTATRGTMNHSFIFGYEPLA
GQMRDMRISVVHYVLPTRGLLGLRQFLTLTATRGTMNHSFIFGYEPLA
GTMRDMSVSSVQFVYHVPTRGLLGLRQFLTLTATRGTMNHSFIFAGYQPYA

: \* \* : \* \* : : : : : \* \* \* : \* \*

15608305\_Mycobacterium\_tuberc  
94971430\_Acidobacteria\_bacteri  
46446750\_Proteobacteria\_amoeba  
89284086\_Tetrahymena\_thermoph  
42733852\_Dictyostelium\_discoi  
34909598\_Oryza\_sativa  
79323586\_Arabidopsis\_thalia  
15889919\_Agrobacterium\_tumefa  
51473460\_Rickettsia\_typhi  
56696900\_Silicibacter\_pomeroy  
23612528\_Plasmodium\_falcip

GRMVEANHWVMDVFPVSRGLIGWRTDFLTETRGSGVGHAVFDGYRPA  
GQMEKMTNHRVMEFKVPSRGLIGLRSSELLTDTRGTIVMNSLFAGYTEWQ  
GELQLLDDITAIIDFLIPTRGLMGYRNDFLTRGLGILTSVFENFSPWK  
GVYENCEELLHKLSTVPTVRGMIGFRSELLNDTKGTAVLESCFLEYQEHR  
GDITDMQKSKSLVFLVPSRGLIGLRSSEIINDTKGTGVMNHLFHSVYPHK  
GEVMDMGVPRTRIFLTCPSRGLVGFKGFSSFTTRGTGFMHRAFOYAKYR  
AEVIDMGVPRTRLSLTCPSRGLVGYRCVFSSTDRGTGFMHRAFLTYEKYR  
AEMAELRPSRVLKFYAPTRGLIGYQSELLTDTRGTAIMNRLFHDYQPFK  
AEMTNMRPSKSRITFIPGSRGLIGYVNFQFLTETRTGTIINRIFYGYTDYK  
GELVEMKPAKTRIIAHVPSRGLIGYHGEFLTDTRGTGLNRVFGHWTPHK  
AEIVDIINDNTFIKICPSRNFVGMRSYLRDISKGTISIINSELKEYKKKQ  
. \* : \* . : \* . : :

34762648\_Fusobacterium\_nuclea  
28210762\_Clostridium\_tetani  
6458935\_Deinococcus\_radiod  
51892172\_Symbiobacterium\_therm  
67920868\_Crocospaera\_watsonii  
16329356\_Synechocystis\_sp.  
33861319\_Prochlorococcus\_marin  
69247248\_Enterococcus\_faecium  
16078541\_Bacillus\_subtil  
21674245\_Chlorobium\_tepidu  
57169035\_Campylobacter\_coli  
15611499\_Helicobacter\_pylori  
45658203\_Leptospira\_interr  
39995607\_Geobacter\_sulfur  
24375888\_Sewanella\_oneide  
16272804\_Haemophilus\_influe  
59801217\_Neisseria\_gonorr  
30250473\_Nitrosomonas\_europa  
32474280\_Rhodospirillum\_baltic  
53715742\_Bacteroides\_fragil  
48854524\_Cytophaga\_hutchi  
91201932\_Candidatus\_Kuenenia  
30684514\_Arabidopsis\_thalia  
30684509\_Arabidopsis\_thalia  
50906979\_Oryza\_sativa  
CM3614\_Cyanidioschyzon\_merolae  
106888453\_Roseiflexus\_sp.  
53795725\_Chloroflexus\_aurant  
113940020\_Herpetosiphon\_aurant  
15608305\_Mycobacterium\_tuberc  
94971430\_Acidobacteria\_bacteri  
46446750\_Proteobacteria\_amoeba  
89284086\_Tetrahymena\_thermoph  
42733852\_Dictyostelium\_discoi  
34909598\_Oryza\_sativa  
79323586\_Arabidopsis\_thalia  
15889919\_Agrobacterium\_tumefa  
51473460\_Rickettsia\_typhi  
56696900\_Silicibacter\_pomeroy  
23612528\_Plasmodium\_falcip

GDIPTRNKGVLIATEPGVTPYALNNLQDRGTLFLDPGPVVEYEGMIVGEH  
GEMPSKPRGSLVVFETGTAITYGLYNAQERGLFIPGTEVYQGMIAAGEY  
GELKTRQNGSLVSMEDGTSFAYSIWKQLQDRGNFFIDAGQEVVYGMIVGEN  
GEIPTRQRGSLVASETGATQYALYQIQERGLFIEPGTEVYVGMVGEN  
GELETRNGVIAFEEGTSTFYAMKNAEDRGVFFIIPGTKVYKGMIGEN  
GDLETRYNGVMVAFEEGVATFYAMKNAEDRGVFFITPGTKVYKGMIGEH  
GDFETRRNGVLSFEEGVATFYALKNAEDRGVFFIKPGVYKGMIGEN  
GQIGGRHQGALVSDTGKATYSIMSIEERTVFVEPGTEVYEGMIVGEN  
GQVGGRRQGVLSMENGKATSIGIQGIEDRGVIFVEPGTEVYEGMIVGEH  
GKLPSTREGALVSAETGVAVAYAISSLEDRTFFIGPNAKVYEGMVVGES  
GAVEKRNNGALISMENGVALGYSFLNQLQERGVLFIEPQTKVYTGMIIGEH  
GSVESRKNKALISMENGEATFSLFNQIQRGALFINPQTKVYVGMVIGEH  
GDIPGRKNGVLSMDSGESTAYALWKIQERGLVIGPNTSIVYEGMIGIH  
GDIPGRKNGVLIAMELGETTAYALDALQPRGILFIPGVEVYVGMVIGQH  
GDIGQRANGVLSNATGKALTFALFGLQDRGRFLIGHAAEVYEGQVVGIIH  
GEIGQRKNGVLSNATGKALGALFGLQERGLMIDANIEVYEGQIIGIH  
PDMGRHNGVLSVQEQGEAVAYALWNLDRGRMFVSPNDKIYEGMIGIH  
PDMASRKNVLSAEMGEAVAYALWKLQERGRMFVSPGEPLYEGMIVIGIH  
GDVPRRANGVLSVMVGKTMPPALFALQDRALFVPPSTEVEYEGMIVGEN  
GDIERTNGSIIAMESGTAFAYAIIDKLQDRGKFFIFPQEEVYAGQVGEH  
GAIPERVSGSIIISMDSDVTAYALDKLQDRGKFFIEPGDVYIQGMVIGEH  
GDIVHRTQGVLSMAAGEATAYALEGLHDRGIMFVKPGEEVYEGMIVGEH  
GDISTRDLGSLVAFEDGTSTSYALASAQERGMFVSGVDVYKQIVGIIH  
GDISTRDLGSLVAFEDGTSTSYALASAQERGMFVSGVDVYKQIVGIIH  
GDLSSRDQGSVAFEDGTSTSYALLNAQERGLFVSPGDVYKQIVGIIH  
GQVRLREVGSLLAHETGRVTTYGVEAAQERGLFVAPGAEVYENQIVGEN  
GEIVTRTNGSLIASSEGVATAYALNQAQERGLFITPGAEEVYEGMIVGQH  
GEIEMRANGVLSIAESGVATYAIHALQDRGVFFITPGAEEVYEGMIVGQH  
GDVQTRQFGLSIAWEQGVTTSSYGLSSAQERGLFVSGVDVYEGMIVGQH  
GEIRARHTGSLVSDRAGAITPFALLQLADRQGFVVEPGQTYEGMVVGIN  
GDIPHRPTGALVADRNGLTAYALFGLQERGLFVSPGDVYEGMIVGEN  
GTPIDRTRGSLVSNPCKTSGYACFNLDQDRGMVFPVAPGDEVYEGMIVGEN  
GALKKNNKGPLICTSEGIVTAYALKTCFKGQLFIEPGSKVYVPGQVIGEN  
GPMDNKEKCALISMSEGVATFSLSALEDGRVLFIEPQTOVYSGMIVGEN  
GQLGNVRKGVLSVSGKGLITSHALMSLEARGILFVSPGMEAYEGMIVGEH  
GPLGNVRKGVLSMARGTITAHSLMSLEARGILFVSPGALDSYDGMIGEH  
GQIAGRNGVLLSNGSGEAVAYAMFNLEDGRGPMIIEPGEKVYAGMIGIH  
GPIEGRKNGVLSNCDGAAVAYALWNLERGMKFINPGDKVYRGMIGEH  
GAIPGRRAGVLSMENGQSVAYALWNLERGRMFIEPQTOVYEGMIVGEH  
PSYKRRANGVLISSSSGTTTAFSLDPIQKGNLNVNENYPTVEYEGMIVGEH  
\* : : \* . . : : \* . : \*

34762648\_Fusobacterium\_nuclea  
28210762\_Clostridium\_tetani  
6458935\_Deinococcus\_radiod  
51892172\_Symbiobacterium\_therm  
67920868\_Crocospaera\_watsonii  
16329356\_Synechocystis\_sp.  
33861319\_Prochlorococcus\_marin  
69247248\_Enterococcus\_faecium  
16078541\_Bacillus\_subtil  
21674245\_Chlorobium\_tepidu  
57169035\_Campylobacter\_coli  
15611499\_Helicobacter\_pylori  
45658203\_Leptospira\_interr  
39995607\_Geobacter\_sulfur  
24375888\_Sewanella\_oneide  
16272804\_Haemophilus\_influe  
59801217\_Neisseria\_gonorr  
30250473\_Nitrosomonas\_europa

NRENDLVNVCKTKKLTNMRASGSDDAVKLATPRKFTLEQALDYIAEDEL  
SRAGDIEVNVCKKHLNTRSSGADDALKLTPITPMSLEECLEFIAADEL  
AREQDMNVNVCKNKLTNVRSSGADEALTLIPPKRSLSEDALEYIAADEL  
SRGQDMNVNVCKTKKLTNIRAAGADEKLLDPPRKLTLSEALEQIADDEL  
NRPDLELVNVCKTKKLTNHRASGEELVQLQAPQEMSLERALEYIGSDEL  
NRPDIELVNVCKTKKLTNHRASATGDELVQLQAPEDMNLERALEYIGPDEL  
NRSQDLELVNVCKTKKLTNMRASGAEELDTLQSPVDITLERALEYIGPDEM  
SRDNDLVNITKAKQMTNVRSAKTDQTSVIKPKQLTLESLEFLNDDIEY  
NRDNDLVNVNVMKQQTNRVRSATKTDQTTIKKARIMSLESELEYLNDEY  
TRDLDTVNVCKTKKLTNMRASGSDSIRLTPPKRSLSEQALEFINDEL  
SRPNDLVNPIKGNLTNVRASGSDDAIKLPPRKLTLERALEWIEEDEL  
SRDNDLVNPIKSKLTNMRASGSDDAIKLTPRMTVLERALEWIEEIEI  
SRDNDLVNVPKVKKLTNVRSSGADEAIRLVPPRKFSLQNIIFLDDDEL  
AKDNDLVNVPCKGKLTNVRASGSDDAIKLTPRILTLSEQALEFIDDEL  
ARSNDLVNCLKKGKLTNMRASGDEAQLVLTPTITLTLSEQALEFIDDEL  
SRDNDLVNCLGKGLTNMRASGDDAIVLTPPVKFSLEQAIIEFIDDEL  
SRDNDLVNPLKGGKLTNIRASGDEAVRLTTPIKLTLEGAVEFIDDEL  
SRENDLVNPIKGGKLTNIRASGHDEAVLTPPIQLTLESAIEFIAADEL

32474280\_Rhodopirellula\_baltic ARENDMTVNPCKREKLTNMRASGSDENVILKPPRDMSEAALEYIEDEL  
53715742\_Bacteroides\_fragil AHEKDLVVNVTKSKKLTNMRASGSDKARLIPPVQFSLEEALYIKEDY  
48854524\_Cytophaga\_hutchi NRQNDITVNVQREKLTNMRASGTDNNAKIAPKINFSLEEMMEYIQDEY  
91201932\_Candidatus\_Kuenenia CEQNDIVVNVIREKKATNIRQATGEKSVKLSPHREFSLEMALEYIEDEL  
30684514\_Arabidopsis\_thalia QRPDGLNLNICKKKAATNIRSN-KDVTVILDTPLTYSLDDCIEYIEDEL  
30684509\_Arabidopsis\_thalia QRPDGLNLNICKKKAATNIRSN-KDVTVILDTPLTYSLDDCIEYIEDEL  
50906979\_Oryza\_sativa QRPDGLAINVCKKKAATNVRSN-KETVVLDEALSYSLDDCIEYIQEDEL  
CM3614\_Cyanidioschyzon\_merolae KYPEDLRVNVCRVKQLTNHRSATKEVVKTLOGIRTLTLDDALEYISENEF  
106888453\_Roseiflexus\_sp. IRERDLEVNVCRRKHLTNIRSSAEEGIRLETPRILSLDDAIEYISDDEL  
53795725\_Chloroflexus\_aurant IRDNDLEVNVCCKEHLTNMRNNGAETIRLDAPRQLSLDDAIEYISDDEL  
113940020\_Herpetosiphon\_aurant IRDEDLEVNACKKQLTNMRSSGADDALRLDVPNMSLDDCIEYLADEL  
15608305\_Mycobacterium\_tuberc PRPEDLDINVTRKLTNMRSSADVIETLAKPLQLDLERAMELCAPDEC  
94971430\_Acidobacteria\_bacteri SRDNDLDVNCVREKLTNMRASSTDDAIRLVFPKLNLEQAIIDFIADDEL  
46446750\_Proteochlamydia\_amoebo SRDNDLVVNVTKGKQLTNVRASGSDENIILIPARRFTLEQAIDYIQDEL  
89284086\_Tetrahymena\_thermoph QKSEVELNPTKKKELNIRTKSHEEKIVLQPHRVFSIEEAICYIRDEI  
42733852\_Dictyostelium\_discoi SKLTDLDVNPVKSKQLTNIRTVKEEGRILSPKLLKLEEAICVKEDEL  
34909598\_Oryza\_sativa SRDSDLDINPVRTKELTNIRAPGKDENVRLSPRLMSLEEAIGYVADEL  
79323586\_Arabidopsis\_thalia SRETDLDLNPKAKELTNIRSAKDENVKLSPPRLMTLEEAIGYVADEL  
15889919\_Agrobacterium\_tumefa TRDNDLEVNVLKKGKQLTNIRAAGKDEAVKLTIPPIMTLDRALSWIQEDEL  
51473460\_Rickettsia\_typhi NRDNDLDVNPVKAKQLSNVRVAGKDEAIRLTPPMLLTLEQAISYIQDEL  
56696900\_Silicibacter\_pomeroi SRDNDLEVNPLKGGKLTNVRASGTDDAVRLTPHIQFSLEEAIAIDDEL  
23612528\_Plasmodium\_falcip FLSDNIEEMNAIKVQHLRNKGHEDTIRIN-HKNITIEYALSIQDDEE

:: :\* : \* : \* : : : : \*

34762648\_Fusobacterium\_nuclea VEVTPTNIRLRK  
28210762\_Clostridium\_tetani VEVTPISIRMRK  
6458935\_Deinococcus\_radiod VELTPQSIRLRK  
51892172\_Symbiobacterium\_therm VEITPKSIRLRK  
67920868\_Crocospaera\_watsonii VEVTPESIRLRK  
16329356\_Synechocystis\_sp. VEITPESIRLRK  
33861319\_Prochlorococcus\_marin LEVTPDSIRMRK  
69247248\_Enterococcus\_faecium CEVTPESIRLRK  
16078541\_Bacillus\_subtil CEVTPESIRLRK  
21674245\_Chlorobium\_tepidu LEVTPENIRIRK  
57169035\_Campylobacter\_coli VEVTPQNVVRK  
15611499\_Helicobacter\_pylori LEVTPNLIRK  
45658203\_Leptospira\_interr LEVTPTSIRLRK  
39995607\_Geobacter\_sulfur VEVTPQSIRLRK  
24375888\_Shewanella\_oneide VEVTPKSIRVRK  
16272804\_Haemophilus\_influe VEVTPESIRIRK  
59801217\_Neisseria\_gonorr VEITPQSIRLRK  
30250473\_Nitrosomonas\_europa VEITPKSIRIRK  
32474280\_Rhodopirellula\_baltic VEVTPESIRLRK  
53715742\_Bacteroides\_fragil VEVTPKAMMRK  
48854524\_Cytophaga\_hutchi IEVTPKSLMRK  
91201932\_Candidatus\_Kuenenia VEITPKTFRLRK  
30684514\_Arabidopsis\_thalia VEVTPSSIRMCK  
30684509\_Arabidopsis\_thalia VEVTPSSIRMCK  
50906979\_Oryza\_sativa VEVTPASIRMCK  
CM3614\_Cyanidioschyzon\_merolae VEVTPQSIRMFK  
106888453\_Roseiflexus\_sp. VEVTPKSIRLRK  
53795725\_Chloroflexus\_aurant VEVTPKGWRIRK  
113940020\_Herpetosiphon\_aurant LEVTPPLHFRLRK  
15608305\_Mycobacterium\_tuberc VEVTPDIVRIRK  
94971430\_Acidobacteria\_bacteri CEVTPKTLRLK  
46446750\_Proteochlamydia\_amoebo IEVTPDSIRMRK  
89284086\_Tetrahymena\_thermoph VEVTPKEIRIRK  
42733852\_Dictyostelium\_discoi IEITPKSIRLRK  
34909598\_Oryza\_sativa IEASFLYLLMI  
79323586\_Arabidopsis\_thalia IEVTPKTIRLRK  
15889919\_Agrobacterium\_tumefa MEVTPKSIRLRK  
51473460\_Rickettsia\_typhi VEVTPKSIRLRK  
56696900\_Silicibacter\_pomeroi VEVTPNTIRLRK  
23612528\_Plasmodium\_falcip IEVTPKRIVMRK

\* : \*

**Note:** This gene is distributed in bacteria and various eukaryotes, including several protists. Sequences from TBestDB are too short for phylogenetic analyses. There are multiple versions of this gene in photosynthetic eukaryotes, one of which forms a monophyletic group with homologs GNS bacterial sequences with strong support (middle part of the tree). The other eukaryotic sequences group with alpha-proteobacterial homologs, likely resulting from intracellular gene transfer from mitochondria to the nucleus. Protein products of GNS bacteria-related genes (GIs: 30684514 and 30684509) are targeted to chloroplasts and intracellular components in *Arabidopsis*.

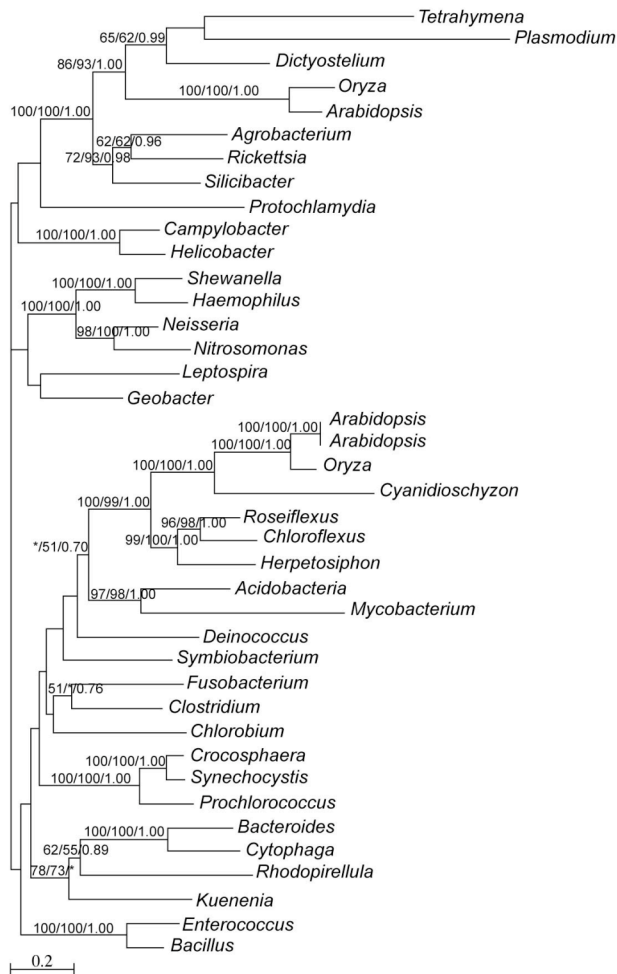

**Figure 19.** Molecular phylogeny of GTP binding protein, *typA*. P-value = 0.811 from AU test for the presented gene tree. AU tests were performed on alternative topologies including (A) monophyly of all eukaryotic sequences, (B) monophyly of red algal, green plant and cyanobacterial sequences, and (C) monophyly of red algal, green plant, cyanobacterial, and chloroflexi sequences. Topologies A and B investigate if red algae and green plants acquired the gene from mitochondria or plastids respectively, without invoking scenarios of secondary HGT. Topology C investigates if red algae and green plants acquired their genes from plastids and subsequently spread to chloroflexi through secondary HGT events. P-values < 0.001 from AU tests for topologies A and B whereas p-value = 0.195 for topology C. Therefore, the scenario of a plastidic origin in red algae and green plants and secondary HGT, although less parsimonious, cannot be confidently rejected.

## 20. Histidinol-phosphate transaminase (D)

CLUSTAL X (1.83.1) multiple sequence alignment

14601796\_Aeropyrum\_pernix  
37522992\_Gloeobacter\_violac  
16330049\_Synechocystis\_sp.  
45507495\_Anabaena\_variab  
45655703\_Leptospira\_interr  
34762988\_Fusobacterium\_nuclea  
118725567\_Clostridium\_cellulo  
13474816\_Mesorhizobium\_loti  
57234598\_Dehalococcoides\_ethen  
15643798\_Thermotoga\_mariti  
15807448\_Deinococcus\_radiod  
53764865\_Anabaena\_variab  
16330453\_Synechocystis\_sp.  
27381336\_Bradyrhizobium\_japoni  
15599643\_Pseudomonas\_aerugi  
27376508\_Bradyrhizobium\_japoni  
45358779\_Methanococcus\_maripa  
118727390\_Clostridium\_cellulo  
29609816\_Streptomyces\_avermi  
21674079\_Chlorobium\_tepidu  
37520892\_Gloeobacter\_violac  
45508256\_Anabaena\_variab  
15607044\_Aquifex\_aeolic  
48767779\_Ralstonia\_metall  
57234394\_Dehalococcoides\_ethen  
CM4361\_Cyanidioschyzon\_merolae  
CPO00006602\_Cyanophora\_paradox  
118046429\_Chloroflexus\_aggreg  
145342157\_Ostreococcus\_lucima  
15217609\_Arabidopsis\_thalia  
18416245\_Arabidopsis\_thalia  
79327596\_Arabidopsis\_thalia  
145334365\_Arabidopsis\_thalia  
48855138\_Cytophaga\_hutchi  
53714475\_Bacteroides\_fragil  
32411469\_Neurospora\_crassa  
57223533\_Cryptococcus\_neofor  
57506033\_Campylobacter\_upsali  
45658350\_Leptospira\_interr  
29607917\_Streptomyces\_avermi  
13475919\_Mesorhizobium\_loti  
42522616\_Bdellovibrio\_bacter  
16079319\_Bacillus\_subtil  
118046536\_Chloroflexus\_aggreg  
15598361\_Pseudomonas\_aerugi  
48771086\_Ralstonia\_metall

14601796\_Aeropyrum\_pernix  
37522992\_Gloeobacter\_violac  
16330049\_Synechocystis\_sp.  
45507495\_Anabaena\_variab  
45655703\_Leptospira\_interr  
34762988\_Fusobacterium\_nuclea  
118725567\_Clostridium\_cellulo  
13474816\_Mesorhizobium\_loti  
57234598\_Dehalococcoides\_ethen  
15643798\_Thermotoga\_mariti  
15807448\_Deinococcus\_radiod  
53764865\_Anabaena\_variab  
16330453\_Synechocystis\_sp.  
27381336\_Bradyrhizobium\_japoni  
15599643\_Pseudomonas\_aerugi  
27376508\_Bradyrhizobium\_japoni  
45358779\_Methanococcus\_maripa  
118727390\_Clostridium\_cellulo  
29609816\_Streptomyces\_avermi  
21674079\_Chlorobium\_tepidu  
37520892\_Gloeobacter\_violac  
45508256\_Anabaena\_variab  
15607044\_Aquifex\_aeolic  
48767779\_Ralstonia\_metall  
57234394\_Dehalococcoides\_ethen

ALDLSSPSNPLGPPRYPDYEYLGREAVAGFIDLERVIPLNGAAEILPLA  
LVDFASINPLGPPHYAPHGSDLSALAAIEPERIVCGNGAAELTWA  
LLDFSASINPLGPPHYDPDQYIHLRQAIADHLSDWVLPNGGSAELLTLA  
IVDFSASISPLGPPHYDPDYSELRLALGHFLPLEWILPGNGSAELLTLA  
LLDFSANINPLGFPSYDPDNYTSLKKKIHSKICTEQIVLNGGASELILQI  
ILDYSSNINPLGVPNYDPYIYELRKKIAEFLNMDNIIVNGATEILFLY  
LIDFSANINPLGLPNYPDPLCRELKKIEISAYVPEEYLFCEGGAADVIRI  
WVKLNTNENPFPLPLYPEDDNI SLREAAANAVSMDQVIAGNGSSELLGLV  
VMDFSVSSNYPAPRYPDSASLKEYLAGRLKPENLIMGNGSMEIIRLV  
KTYLALNENPFPIYDSDPEELIEKILSYLSKNNVSVNGADEIIVVM  
PYKLDQENENPYDFPRYPDLHADTLRAAIAGYWDAAAGVITPGENVLKIL  
VIKLSNENPYPPSRYPEPLGGEFREAAASKVPSDWLIVNGSDEILSIV  
FIKLNNTNENPYDPPLYPDPVSTQLRQAAADLVLDNQVLGNGSDDILNIV  
VVKLNTNENPYPPSLYPDPRAATRLREAIAAYVAEQVFNNGSDEVLAT  
LVKLNNTNENPYGSLYPDPNGERLQKQAAAHVQANQVFNNGSDEVLAIH  
VFKLSANETPFGPSDYPEGTSRVLREAIIGRTLDPNRIICGAGSDEILNLL  
IIKLGSNENPWGCSQYQPINPELMEISKFMPVENIVGGDADEVIDNI  
KIKLDANENSPFTLPLYPDTSVQLRQALGEYVDKENIIVGTGSDQLIQII  
PVRLNTNENPYPLPRYPDRDAVELRTELATYVGIENVWAANGSNEVIQQL  
EVKLNQENENPFDLPRYPDILPYRGMAYASFVKPELVIMNGSNEMLYTI  
ADKLDANELPHDLPRYPEGDPALKAIAEYVTSEMVCVNGSDELIRSL  
LDRLDTNENPCDLPRYPDGGHEELKDAIAQYITAAANISVNGSDEILRSL  
SVRLSSNEFPYDFPKYPDPEAKELKAVLADFVKEENLVNGSDELIYYL  
LVKLDANENPYRLPRYPVPSSEALRAKLRKTVVPAQVLLGNGSDEIISML  
IIKLDANENLYGAAIYPDATQFEIRLLAEYVNMEOICGAGSDQLIDLL  
IIKLDANENPYGVCIYDPPESERELRELAALAFVPSRLLVGHGADELIDLI  
-----  
IVKLDANENPYGPAIYDPDEQALRSALASRYPIEEILCGAGADELIDL  
IVKLDANENPYGPIYDPDESRRLRAALAEVPTENLLVCGGADELIDLL  
IVKLDANENPYGPPVYDPDQSRRLRDALAQDLESEYILVCGGADELIDLI  
IVKLDANENPYGPPVYDPDQSRRLRDALAQDLESEYILVCGGADELIDLI  
IVKLDANENPYGPPVYDPDQSRRLRDALAQDLESEYILVCGGADELIDLI  
IVKLDANENPYGPPVYDPDQSRRLRDALAQDLESEYILVCGGADELIDLI  
GIFLDANENPYGSARYDPDPLQRDVKTALSALVSAEHIFFGNGSDEIDLL  
SVFLDANENPYNLPYDPDPMQRDLKLELSKIVAPAHIFLNGSDEAIDL  
NILLDANENAYGPPRYDPDPMQRDLKQLLCSLLTPENLCVGVGSDEAIDL  
GILLDANENAIGPSRYPSPTHDELKREIAKLVPDENVFLGNGSDEIDML  
VIKLSNENPLGVSPLYDDSMSELNRNALALKLMQNVIIAGSDQIIELA  
IIKLGSNENPFCAFYPDDSYLDLKTATASKLTTDRIIPGNGSDQVLDV  
AYKLSNENPYPLRYPDPMACGLMSELSEVPLSHLATGTGSGVGAQQ  
IAKLSNENPLGVSPLYDPDAGRELQAIAAKFGEDQIILGNGSDELLSVI  
VYKLSNENPLGVSPLYDPDPSHYELLQTLSEKFPKQLAIGNGSDEILDL  
VVKLSNENPYGCSLYPDGYSALRTRLSKRVSETSLIFGNGSDEIIOII  
PIRMAANENPLGPSRYPDAGGAALRYALATRLSPEHVMNGSDEILMI  
IVKLSNENPLGASRYPDGNGFELKRLKRAERVDAAQVTLGNGSDEILDLV  
IVKLSNENPLGMPRYPDSNGFELKAKLSEKVAEAWLTLGNGSNDILELA

AIVVVEPNFGDHTILALSAGIPCHSVFSLEGLSIVLSNPNNTGSAAR  
GTVLPPIAFGDYRRALAFDAPYISVFLPGDAMLANPHNPSGYLYSPT  
GTYYVGFAGFDYGRSWRAGAGELKTIQWPWHGLILNPNHPNGTLLARE  
GTVLITPAFGDYRTRRAYHARVLEFRVLGNVALLNPNHPNGTKLPTRE  
PALIAVPCYSYKEAISLLKIPCIIEVFRDLKALVFLGHPNPNPTGVTLDKI  
IVLILAPCFAYERALKSVSAKIEYFFYPNYDLLLLFCNPNPNPTGQFLKLE  
ATLLTAPTFSYEEAVKVFDSNITYHFNIIDIRLMFLCNPNNPTGILTEKE  
YVAMMSPGFSFRKRLATLQGAQFVEIHSLPAKFILLANPNPNPTGTFVVA  
AVLILKPTFGEYELAAEVAGADIEQKFKDPKAVFICNPNPNPTGVYLSKA  
MSVFFPPTYSYRIFAKAVGAKFLEVLRIIPGDVVFIPNPNPNPTGHVFERE  
TVLTTDPTFSVYTLAAMLGAEVLVTFSLPPGVFVYVQPHAPTGHSDRPE  
IVVYPMPTYVLYRLLTQMQAADILEINVLPGAATFIASPNPSGHIIVPND  
VVAFLDLTYSLEYETIASVHGAKVQKIFDLTAKLIFLSPNPNPKGKHLNRE  
FLLFPDVTYSFYVYCYRLYGVAHEEVMRIESSAILLCPNPNPTGIALPRD  
FLLFPDVTYSFYVYCYRLYGVAHEEVMRIESSAILLCPNPNPTGIALPRD  
AAISTHGVLYVPIATMAVGARNVIALTCDTKLVWLANPNPNPTGTYIIPF  
MVIIPITFTQYASAKIHGANIKWAFKLDTKAIFLCTPNPNPTGNVIPT  
AVLYPTFSFGMYKDCSVIAGGRAVDYFYSYSPKVIYICNPNPNPTGNLMPQD  
LAIGFEPSPSMHALIARGTGTAWISGFTIDPDVVFITPNPNPTGTAVPPE  
FVLIPEPSFSLYDKLRLQAGGVVEVLSFDVDFIVLSTPNNSKSLSHD  
IVASAEPTFSMYRILAEATLAVPYIGVGVVDVRLFLANPNPNPTGNLLSDE  
LILVANPTFSMYGILAEATLAVPYIGVGVVDVRLFLANPNPNPTGNLLSDE  
SVYIPVPTFPMYEISAKVLRPLVKKVFDIDPVLGYFAYPNPNPTGNLFSRG  
SVMAPVPGFVYAMSAQFAGLEFVGVFTLDPALIIYLAIPNPNPTGNLFDAD  
LVINCPTTFAMYKFYTDLNRGTVVNVYDVNTKLIIFIAIPNPNPTGTASKE



CM4361\_Cyanidioschyzon\_merolae  
CP00006602\_Cyanophora\_paradox  
118046429\_Chloroflexus\_aggreg  
145342157\_Ostreococcus\_lucima  
15217609\_Arabidopsis\_thalia  
18416245\_Arabidopsis\_thalia  
79327596\_Arabidopsis\_thalia  
145334365\_Arabidopsis\_thalia  
48855138\_Cytophaga\_hutchi  
53714475\_Bacteroides\_fragil  
32411469\_Neurospora\_crassa  
57223533\_Cryptococcus\_neofor  
57506033\_Campylobacter\_upsali  
45658350\_Leptospira\_interr  
29607917\_Streptomyces\_avermi  
13475919\_Mesorhizobium\_loti  
42522616\_Bdellovibrio\_bacter  
16079319\_Bacillus\_subtil  
118046536\_Chloroflexus\_aggreg  
15598361\_Pseudomonas\_aerugi  
48771086\_Ralstonia\_metall

14601796\_Aeropyrum\_pernix  
37522992\_Gloeobacter\_violac  
16330049\_Synechocystis\_sp.  
45507495\_Anabaena\_variab  
45655703\_Leptospira\_interr  
34762988\_Fusobacterium\_nuclea  
118725567\_Clostridium\_cellulo  
13474816\_Mesorhizobium\_loti  
57234598\_Dehalococcoides\_ethen  
15643798\_Thermotoga\_mariti  
15807448\_Deinococcus\_radiod  
53764865\_Anabaena\_variab  
16330453\_Synechocystis\_sp.  
27381336\_Bradyrhizobium\_japoni  
15599643\_Pseudomonas\_aerugi  
27376508\_Bradyrhizobium\_japoni  
45358779\_Methanococcus\_maripa  
118727390\_Clostridium\_cellulo  
29609816\_Streptomyces\_avermi  
21674079\_Chlorobium\_tepidu  
37520892\_Gloeobacter\_violac  
45508256\_Anabaena\_variab  
15607044\_Aquifex\_aeolic  
48767779\_Ralstonia\_metall  
57234394\_Dehalococcoides\_ethen  
CM4361\_Cyanidioschyzon\_merolae  
CP00006602\_Cyanophora\_paradox  
118046429\_Chloroflexus\_aggreg  
145342157\_Ostreococcus\_lucima  
15217609\_Arabidopsis\_thalia  
18416245\_Arabidopsis\_thalia  
79327596\_Arabidopsis\_thalia  
145334365\_Arabidopsis\_thalia  
48855138\_Cytophaga\_hutchi  
53714475\_Bacteroides\_fragil  
32411469\_Neurospora\_crassa  
57223533\_Cryptococcus\_neofor  
57506033\_Campylobacter\_upsali  
45658350\_Leptospira\_interr  
29607917\_Streptomyces\_avermi  
13475919\_Mesorhizobium\_loti  
42522616\_Bdellovibrio\_bacter  
16079319\_Bacillus\_subtil  
118046536\_Chloroflexus\_aggreg  
15598361\_Pseudomonas\_aerugi  
48771086\_Ralstonia\_metall

14601796\_Aeropyrum\_pernix  
37522992\_Gloeobacter\_violac

FVVNAPPTFGMYQFDADLNAAKVVSVFRFPPIRVFVTCPPNPDGSRISDS  
-----  
LIIDCPPTFGMYRFDAGICGGRVIVSVFSLDAKAIFFLTAPNNPTGNLPLRT  
LIINTPPTFGMYSFDCNINAGDVIDIFKIDPKLLFLTSPNNPDGSLIEED  
MIIDCPPTFSMYVFDAAVNGAGVIKVFSLNPKCIFLTSPNNPDGSIISED  
MIIDCPPTFSMYVFDAAVNGAGVIKVFSLNPKCIFLTSPNNPDGSIISED  
MIIDCPPTFSMYVFDAAVNGAGVIKVFSLNPKCIFLTSPNNPDGSIISED  
MIIDCPPTFSMYVFDAAVNGAGVIKVFSLNPKCIFLTSPNNPDGSIISED  
IILILPPTYGMYEVSAGINDVDIISVFDLDTKIIIFICSPPNNPTGNLMSED  
FVVAIDPTYGMYQVCADVNDVEYRKFVQFSTKMIIFLCSPPNNPTGNLDLRS  
LILVCPPTYGMYSVSAQVNDVGLVKVFAIDIKIILYLCSPGNPTGSLLAKE  
YVITCPTTYGMYKVTANVNDIGVLEVFQLDVKLLFICSPGNPTGTLLIPLD  
TFLOQCQVGFAMYEIYAKQVGAAYKTTIHTDIKILYLCLPNNPLGECLEDAF  
CVLINRITFAMYKIYALQCGAKIHSTAFLDPKIIFLCTPSNPAGDALSKS  
LVIIYAWRSFEAYPIITQVSGATSVQVDVHDTRLIFVCPNPNPTGTVVRRA  
SVVTLTYPFPLEHEDYATLMGASVKKVLTINPRMLLFSNPMNPVGSWLSAG  
CVLTSAAAFNAYEVSAPANRAVHKVYRFDIRLIFVSNPNPTGTYYATKA  
CTVTAAPTFPQYKHNVAIEGAEVREIGSHDTQVWVICSPNNPTGTYYTSEG  
CAVLAQGSFVSYARRIQAGAIARQIMTHDTRLMFVCPNPNPTGTYYTIGAA  
AAVFSHEFAFVYPIATQAVGAEGRAVWGHDTRVVFNPNPNPTGTWFGAD  
AIVYAEYSFAVYALATQEVGARAEVYGHDTKLVFIANPNPNPTGTWFSAA

DLRELALAVVVDSEFADLS--GVIVARSLTKTLALQGLRIGFAYDDAAL  
ALALALRFKLLIFDEAFIDFLHPGLIVIRSLTKFYSLPGLRGLYALPVAM  
EILALHYQWVLLDEAFMDFLHPNLIILRSLTKFYRLPGLRGLYALHPDL  
AILPLQFALVVDEAFMDFVYPNLVILRSLTKFYSLPGLRGLYAIHPDR  
EVLKIQNSVVFIDESEFHFCTENMILIQSMTKILALPGLRIGICYASPLI  
DIKEIKNTRIFIDEAFIEFI--KNIFIMRAFTKFFAIPGLRGLYGVDFDEI  
MVLRIPTNLTILVDECFMEFLYDNIIVLKAFTKIYAMAGLRLGYISDENI  
DIERLSDRLIVLDEAYVDFAYSNLLVLRFTFSKSYAAAGVVRVGFGFHPEI  
DIEKVTDTLLVLDEAYTAFAGNIIVIRSMTKDCALAGLRLGYGMASAEI  
EIERITGAFVALDEAYEFHYENLAVIRTFKAFSLAAQVRVGVVASEKF  
DVRRVLGWWTVIDEAYSQYAGKHLVLSLRTFSKAWGLAGVRAGYLLTNPEL  
DLRKLKSGVLVIDEAYVDFAYENVILIRTLKSGYSLAGLRLGFGVGNPKL  
FLWQTAEGVVVIDEAYGDFSPDNVIRSLTFSKSYSLAGMRVGLAIAAPAL  
AVAALPDRFLVVVDEAYVDFGHDNLLVITQTFSKSRALAGLRLGYAIGQRPL  
AIEAMPDSVVVVIDEAYVDFGYPNLLVITQTLKSRSLAGLRLGVLAVGHADL  
EVRKLSHVLLVLDAAAYCDYVTEVTVHTFISKIHGLAALRIGWMMFGEPIH  
DIKKITDALVMIDHAYIEYSYDNVLRVLRFTFSKVFGLAGQRVGYGVTSKKV  
EILRVTKSVVVVDEAYAEFSYENLLILRFTFSKAFGLAGIRCGYSIASEKL  
TVLALKPMSVVVDEAYIEFSRPHLVVSRMTSKAFGAAGLRLGYLAHPAV  
ETIERIDAIIVLDEAYVEFSYENLIVLRFTMSKALALAGMRIGFAIANPEL  
IIERLLPVLLVDEAYEFVSRPNLVILRFTFSKAFRLANFRVGYALANPEI  
ELRWLEQILVVVDEAYEFVSRPNVILRFTFSKAFRLAAMRVGYCAHPEA  
KIEEIRGVFCVIDEAYYHYSREDTVLRVLRFTFSKI--GMASLRVGLIGKGEI  
DMAAICQSLVVVDEAYQFFAFGNLLVMRTVSK--LGLAGIRLGYVAGAPEW  
DIRQILGVPTVIDEAYEFTYPNMLILRFTFSKWAGLAGLRLGYGLFPVPI  
DLRRLRLLTVLVIDEAYIEFAYQNLIVLRFTFSKWAALAGLRLGYGAPPEAL  
-----HENLVLRFTFSKMAGLAGMRVGYGAPPLHV  
DLLRILPILVVVDEAYVEFAYPNLVILRFTFSKWAGLAGLRLGYGLFPVPI  
DLLRLLPILVVVDEAYIEFARKNLIVLRFTFSKRAALAGLRLGYGAPPSDL  
DLLKIMPILVVVDEAYIEFSYENLIVLRFTFSKRAGLAGLRLGYGAPPLSI  
DLLKIMPILVVVDEAYIEFSYENLIVLRFTFSKRAGLAGLRLGYGAPPLSI  
DLLKIMPILVVVDEAYIEFSYENLIVLRFTFSKRAGLAGLRLGYGAPPLSI  
KVKRIFSGIVVDEAYIDFAYPNMVVLTQTFKAWGMAALRLGTAFASKEI  
EIKVFEGLVILDEAYNDFSYPNLIIILQTFKAFGCAAIRLGMFAFSEGI  
DIQKVWNGVVVDEAYIDFAWPNLVVMTLSKAFGLAGIRLGAFTSPPI  
VIKRIFFGVVVVDEAYVDFSYANICVSTQTLKSFGLAAIRLGYLLAPPPL  
SVEFEFECLIVIDAAYNEFAPPNVLYLGTFSKLYGLGGLRVGYGMADEEL  
DVEYFLDTLVVDAAYMEFGFNPVFTGTFSKVYGLGMRIGYIGIQEPL  
ELERFSDVLLVLDDEAYREFIRPNVCLVLRFTFSKAYGLAGLRLGYFAIHPEV  
DLSKVDLTLVVVDEAYAEYADQPWIVLRFTFSKAFGLAGLRLGYGAPPEL  
EVEAFDDVMIIIFDEAYNEFVYKNLIVLRFTFSKIYGLAGFRLGAMIAPPEV  
ELLAFSRVLLVLDDEAYEYVYVSNLMLILRFTFSKAYGLAALRVGYGIADENL  
EMAAFDDVLLVVDEAYIEFVRDNLVLRFTFAKIHGLAGLRLGYAFGAPDL  
ALERFAEVLVLDDEAYIEYAHPNLVSRFTFSKAYGLASLRLGYALSASKAV  
EIEAFPHVVVVVDEAYNEYLYPNLMVSRFTFSKAYGLAGLRLGYGVAQFQL

:::\* \* \*

AARLDMARQPWNIALLVERLLGDMEVKGHIAIEAIEGLKPRLYSAVA  
AARWQAWRDPWPVNALAQHLGVAALADLDFERRTRAWLGPARSRLAAGLL

16330049\_Synechocystis\_sp.  
45507495\_Anabaena\_variab  
45655703\_Leptospira\_interr  
34762988\_Fusobacterium\_nuclea  
118725567\_Clostridium\_cellulo  
13474816\_Mesorhizobium\_loti  
57234598\_Dehalococcoides\_ethen  
15643798\_Thermotoga\_mariti  
15807448\_Deinococcus\_radiod  
53764865\_Anabaena\_variab  
16330453\_Synechocystis\_sp.  
27381336\_Bradyrhizobium\_japoni  
15599643\_Pseudomonas\_aerugi  
27376508\_Bradyrhizobium\_japoni  
45358779\_Methanococcus\_maripa  
118727390\_Clostridium\_cellulo  
29609816\_Streptomyces\_avermi  
21674079\_Chlorobium\_tepidu  
37520892\_Gloeobacter\_violac  
45508256\_Anabaena\_variab  
15607044\_Aquifex\_aeolic  
48767779\_Ralstonia\_metall  
57234394\_Dehalococcoides\_ethen  
CM4361\_Cyanidioschyzon\_merolae  
CPO00006602\_Cyanophora\_paradox  
118046429\_Chloroflexus\_aggreg  
145342157\_Ostreococcus\_lucima  
15217609\_Arabidopsis\_thalia  
18416245\_Arabidopsis\_thalia  
79327596\_Arabidopsis\_thalia  
145334365\_Arabidopsis\_thalia  
48855138\_Cytophaga\_hutchi  
53714475\_Bacteroides\_fragil  
32411469\_Neurospora\_crassa  
57223533\_Cryptococcus\_neofor  
57506033\_Campylobacter\_upsali  
45658350\_Leptospira\_interr  
29607917\_Streptomyces\_avermi  
13475919\_Mesorhizobium\_loti  
42522616\_Bdellovibrio\_bacter  
16079319\_Bacillus\_subtil  
118046536\_Chloroflexus\_aggreg  
15598361\_Pseudomonas\_aerugi  
48771086\_Ralstonia\_metall

LAQWQAWRDPWPVNVLAEEAAIASLEAEFRQLVWQWLPPARSALQODLL  
LQKQWLWRDPWPVNTLAAAAATAALEDREFQVQVQWQLPPARELFOGLL  
CSNISKRLPTWNVNSIAASVYEKAISDEDYIENSKQNIKIWEKLIYDILL  
LKKMWEKEPWTVNSFANLAGLVLDDKEYIEKSEKWILEEKKFMYKELI  
IEDLHRAGQPWNVSVAQKCGMAALKEIDYVNRTRKLIKYNRIFLQNSLF  
IGRLRNINQVFNMNVIQAVGISVLHRAAYADNHRHRIHERRRVTLALF  
ITNLKVKCPPWNVNSAAQKAGLVCLCHPSYLAESEKKIKASKEYLRQGF  
IDAYNRVRLPFNVSVSQMFAKVALDHREIFEERTKFEVEERERMKSALY  
AGHLQKLVSAFTINFLTQAVIETALEHPEYMRERVAEIAERGRITYAAVC  
LDLGLFKVSDYNIDAIACKVAVAITDQAYKNCSVAKVKASRTQLTKDLF  
TEEMDKVRDSYNLDRLAQVLTAAALRNQAEFVPLWEKVRHTRTRLMEQLF  
IEALERVKDSFNVDCLAIGAVAAIEDEAWFLESRTRIIASRDVLRDLF  
VEALERIKNSFNLDRLAIGAAAAFEDDAYFRRTCOAVIDSREALSASF  
IDAVNRIRGPFNVSTPAMYAAVAIEDTAHQAMSKQFTETWRNWEITEIL  
VDYMMRIKPIFSLTRASQVSAITALQDKEFFEKCLKEGIESREIYNGLL  
TRAVNLTRPPYNISSLSQFTAAALILSYKEEIQNNIQLVVEERERVLKLL  
VDAVQLVRLPHYLSAITQATALAALEHTDTLLGYVEQLKAERDRLVAELI  
LAEISKPKIPFASRLAEITLMAVLENYSLVTDVAVQYILAERGRIEELI  
AAVLEKVRLLPYNLPLSQAALFAALEHRDVLAAIPEILAERRRIERFL  
IAILEKVRLLPYNLPSFITSALVALQNRAILLESIPQILNERAKLITALL  
VSEINKVRLPFNVTPYSQVMKAVLLEGREFLMEKIQEVVKERERMYDEM  
LSQLDKVRDSYNLDRLAQVLTAAALRNQAEFVPLWEKVRHTRTRLMEQLF  
ADYLSRIKDPYSVNIADAARQTMLOREYMLETVKKIVDERKRLYTELL  
LPHLWKIKQPNVNVVAGVAALEALCQDRLFPQVSWMKAERORLYQILL  
AEHLWKIKQPNVNVASQLAAVASLQDLDLQLNLSRMVAERQLAAGLL  
SEQLWKIKQPNVNVVAAQAAAVASLNAMTELRVRVQAIVAERERLFA  
IEYIWRVKQPNVNSAIAETAALAAALSNPSYLOEVRDKIVFERARMFGLL  
IEYLWRAKQPNVNSVAGEVAALAAALSNKYLEVDVLDALVRERERLFG  
IEYLWRAKQPNVNSVAGEVAALAAALSNKYLEVDVLDALVRERERLFG  
IEYLWRAKQPNVNSVAGEVAALAAALSNKYLEVDVLDALVRERERLFG  
VSVLNKIKPPYINILLTQEAALQVNSVQVDEMVYIKLKQDRLWREELL  
IGVNLKIKYPYVNVNLTQQQAIEMLHKYIEIERWVKTLKEERGYLEEAF  
ARLLNSLKAPYNISSPTSALASYALDGLKVMRANKERLIKQERLVAELG  
VQILSNITKAPYVNSLPTASIALKAVEGVAAMRSVATLNKNRQTLMDL  
INALYKLRAPFNVNILAKAATAALDDEEFVKNLENNSFQMQEFKFA  
ISNLYKMRPPFVNTNLASAATEALKNESYVESYLENNWNEMKRYEFAI  
AAALRKTAVPFGVSQLAQDAAVASLRAEDELGRVGVLCERQVVASLW  
RALLDRVTPFNANGMAQAAALAAALAADEEHLAKVVALAKAERTQVESL  
VEVFNRVRKPFNVNDLAQVAANAALQDKEFIERSQICWKGGLDYFYKLL  
IRQIEPAREPFFNTSRLGQAAAIAALYDQAFIASCVEQNNAGLQYVDFAL  
IAYLERARPVFNVALAQIAGLAALDDTDHLARSLAHANASRTRLTNALL  
ADVLRVROPFNVNSLALAAACAALDDHDYLAQSRRLNDSGMAQLEDGFL  
TDLLNRVROPFNVNSLAQAAVAALDDTAFLQRSaelNRQGARLVEAF

14601796\_Aeropyrum\_pernix  
37522992\_Gloeobacter\_violac  
16330049\_Synechocystis\_sp.  
45507495\_Anabaena\_variab  
45655703\_Leptospira\_interr  
34762988\_Fusobacterium\_nuclea  
118725567\_Clostridium\_cellulo  
13474816\_Mesorhizobium\_loti  
57234598\_Dehalococcoides\_ethen  
15643798\_Thermotoga\_mariti  
15807448\_Deinococcus\_radiod  
53764865\_Anabaena\_variab  
16330453\_Synechocystis\_sp.  
27381336\_Bradyrhizobium\_japoni  
15599643\_Pseudomonas\_aerugi  
27376508\_Bradyrhizobium\_japoni  
45358779\_Methanococcus\_maripa  
118727390\_Clostridium\_cellulo  
29609816\_Streptomyces\_avermi  
21674079\_Chlorobium\_tepidu  
37520892\_Gloeobacter\_violac  
45508256\_Anabaena\_variab  
15607044\_Aquifex\_aeolic  
48767779\_Ralstonia\_metall  
57234394\_Dehalococcoides\_ethen  
CM4361\_Cyanidioschyzon\_merolae  
CPO00006602\_Cyanophora\_paradox

KPYSSQAPFILVRHGVYIRLTPYHSRISVAPGERLERLQEAILD  
TVLPGAANFLLVQSARLLIRLGERYFRVAVRGESENDLLTGALAE  
FPLPSQNFLLVKTQILIRLGEDFFRVAVRMTADNQKLTQALAT  
TPQASAAANFLLVETQQILIRLGRDFRRLAVRSHTDNQRLTKALK  
NLFSSSEANFILLIKLITAVRLSKNFIRIAVTRPEENKKIADAFS  
KAYKTECNFILLIKLITNIRLDYHFIRLAIKDRKLNKMLIELAE  
EVINSKANYVLFRTGILIRLDNKYFRIAVKSREDNEYLVNCKIK  
SVIPSHANFLLARVPIILVAGLENYIRVSIQTEQMDAFLRAASR  
RVLPSETNFLLKVKGLMVRGLPQYVRIAPRTQSEERLLAVAAE  
RITDSRGNFVVFVFMENAVRSFREGVRIITIGKREENDMILRELEV  
TIFPSNTNFLLKTPGIVCRGLDGLRITAVGTPAENDALIAAILA  
HVWDSHGNFLLTKPPKILIRLGEDKLRITVGTDEQNHILVRLALD  
QVCPDANFVFAAPRKILVRRITDYLRITVGTDEIDQLLLAIAS  
EVLPSLANFVFAHRHGVVLRRIEDFLRITVGTDEQCGRLIEVRL  
EVLPSANFVFAHRHGVVLRRIEDFLRITVGTDEQCGRLIEVRL  
KVTPSVANFVLIHFPGLVLRGLPHSLRMTIGTEEANRLVVDGLRD  
EVPYTEANYMLVKVGVIRLEPYFRVSIQTESEENERFLKIMSE  
KVYSSANFILLIKVQGFVRLSDCMRITIGTQEQNSILLDELYA  
DVTESDANFVQFGRFVLRVGVGLRVSAGTPEENDAFDLAVRE  
HTFESDNTFLIRVAGVLRVLMENCLRFVGLREENDRLLELLKK  
ELFPSDANFVLRVPRGSLVGAAGGLRVTVGTPEQNDRLIANVAA  
AVAESANFIFLQKGLVLRQISGGLRITIGTPEENIRTLNHIQT  
EVFPKANFLLRTPDVLVRGLQKCLRVSVGKPEENNFLEALEE  
TVFPSANFVLRVVPKVLIKLLANCLRVTVSTPEENAQFLAEFKA  
KPYSSANFILLKLLGILVRMMENCLRFVSGKPEDTDALLKALGE  
HPYPSQSNFVLCRVGILIRGLTDCIRISMGTPAQMDRLYEVELEA  
EFPSSSNFVLRVVGILIRGLADCVRFVGTPEQISILLSALSD

|                               |                                                |
|-------------------------------|------------------------------------------------|
| 118046429_Chloroflexus_aggreg | TFPPSVANFILCRVNGVLVRLLDGYIRISVGTDPDQDTLLATIAE  |
| 145342157_Ostreococcus_lucima | EPFTSESNFILCRVKGVVIREIADCIRISVGRPEDTDAVVSALAS  |
| 15217609_Arabidopsis_thalia   | NPYPYSYNFILCEVTGVMVRELKGYVVRVSAGKPEHTDVLMECLKQ |
| 18416245_Arabidopsis_thalia   | NPYPYSYNFILCEVTGVMVRELKGYVVRVSAGKPEHTDVLMECLKQ |
| 79327596_Arabidopsis_thalia   | NPYPYSYNFILCEVTGVMVRELKGYVVRVSAGKPEHTDVLMECLKQ |
| 145334365_Arabidopsis_thalia  | NPYPYSYNFILCEVTGVMVRELKGYVVRVSAGKPEHTDVLMECLKQ |
| 48855138_Cytophaga_hutchi     | ELYPSDANFILMRTAIVITRLCEGCVRITVGTAEAKRLLDVLKLT  |
| 53714475_Bacteroides_fragil   | QVFPSSANFFLARVTGIIVRLCGNCLRVTVGTRAENAKLIGALKK  |
| 32411469_Neurospora_crassa    | KLAGGESNFLLYEMLGVVVRGCEGLRITVGTETEEVTRCLGALRE  |
| 57223533_Cryptococcus_neofor  | GLLGGNANFVLCQIVGVVVRGCEGLRITVGTKEECKQATEHIAA   |
| 57506033_Campylobacter_upsali | DFIPSYTNFITYFFKGIIVRDLNA-IRISIGKPYENTRFFFEFES  |
| 45658350_Leptospira_interr    | EFIDSYANFITFFARGIILRDLNA-LRITIGRPEQNDLVLEALEK  |
| 29607917_Streptomyces_avermi  | TVPETQANFVWLRLLGGVVVRGV---RVTVGENEANDIFLKVTER  |
| 13475919_Mesorhizobium_loti   | DVAPSRGNFLFFNCRGVIVKGFDSYVVRVSIKSPAENDHFMAALSQ |
| 42522616_Bdellovibrio_bacter  | PYIPSQGNFVMFDTLGIIMRGFKTHLRLSVGRDHENEAMVALAE   |
| 16079319_Bacillus_subtil      | KCYPSQTNFVLIDFKGIIVRGFPTSLRITIGTKEQNEEILALAE   |
| 118046536_Chloroflexus_aggreg | TVIPGETNFIAVAVHGVLTGLPGWIRISFGTTEENDACIAALQA   |
| 15598361_Pseudomonas_aerugi   | SWIPSKGNFIAVDLAGVIVRGMPTFLRVISIGLPEENDRFLQALGK |
| 48771086_Ralstonia_metall     | EYVKSSGNFVMVVRGGVIVRGLPQWLRVTIGLPEENDAFIAALEQ  |

. . \* .

**Note:** Identifiable homologs of this gene are only found in bacteria, primary photosynthetic eukaryotes and fungi. Protein sequences of primary photosynthetic eukaryotes and chloroflexi have the highest percent identity and they also share many conserved residues. As expected, these sequences also form a well-supported group in phylogenetic analyses. Fungal sequences have the highest percent identity with those of CFB bacteria and form another group with them. It is likely that primary photosynthetic eukaryotes and fungi acquired this gene from chloroflexi and CFB bacteria, respectively. The *Arabidopsis* sequence (GenBank accession number NP\_568226 and TAIR locus AT5G10330) is annotated to be a chloroplast precursor. Sequence of *Cyanophora paradoxa* was obtained from TBestDB.

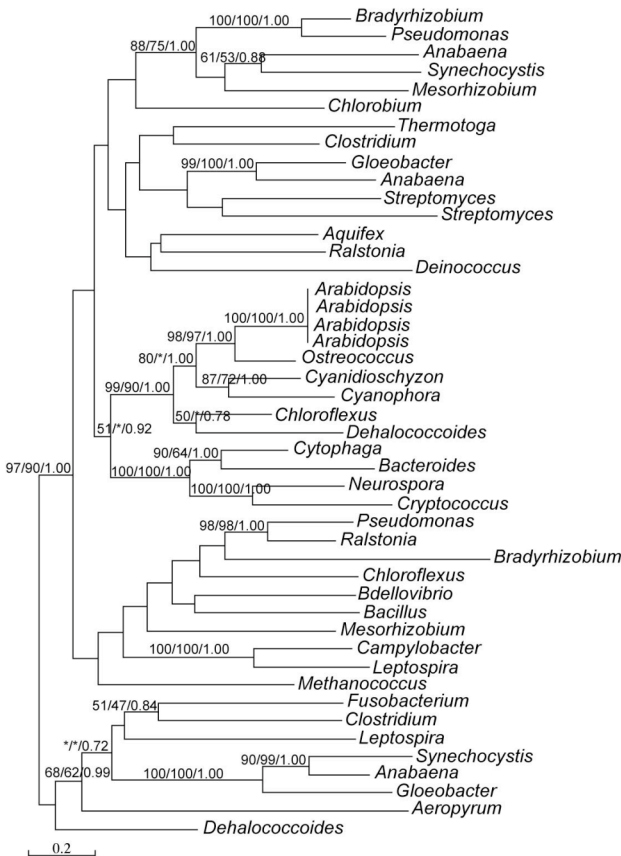

**Figure 20.** Molecular phylogeny of histidinol-phosphate transaminase. P-value = 0.999 from AU test for the presented tree. AU tests were also performed on alternative topologies including (A) monophyly of all eukaryotic sequences, and (B) monophyly of red algal, green plant, glaucophyte, and different versions of cyanobacterial sequences. P-values < 0.001 from AU tests for both alternative topologies.

## 21. tRNA methyltransferase (D)

CLUSTAL X (1.83.1) multiple sequence alignment

```

71030526_Theileria_parva          RVAVLVSGGVDSSSLALWLMKFDVHAFYLKVVTLHLVLPFSKAYSEHILSGV
34540110_Porphyrromonas_gingiva  DVAALVSGGVDSSVVVHRLCYKPAIFYIRICPFEVVDLHKEYWERVVSYT
53712700_Bacteroides_fragil      DIAALLSGGVDSSVVVHLLCYKPTLFYIKILALEVVDLHREYWDNVAAYA
CM4720_Cyanidioschyzon_merolae   EVAVLLSGGVDSSAVAMASLLFRVQPFYFKIVQLETLSLQEEYWSRVVQYT
116060467_Ostreococcus_tauri     RVAVLLSGGVDSSVALALLRHCRAFYQLQIVELETVPLTDAYWNLVVS
15223816_Arabidopsis_thalia      RVAVLLSGGVDSSVALRLLHHSCTAFYKIVPLEVHLLTDEYWERVVS
149197386_Lentisphaera_araneos   KIAMLLSGGVDSSVALRLLKHEITAFYKIIPLQVVPLOKQYMDRVVSYV
2688619_Borreliaburgdo          KIAVLLSGGVDSSVALYRIISNIKCYLKVIPYIEIINFQKEYNKNVVS
60464825_Dictyostelium_discoi    KVCIGMSGGVDSTITAKLLKFDVTGVFIKSIKPMYKADFVKDYWNRV
116054971_Ostreococcus_tauri     SVVVGLSGGVDSSAIAAWALKADVTAATTKNIPLTEIDFTREYWDN
15612319_Helicobacter_pylori     KIAVLLSGGVDSSYSAYSLKHELVGIYKLIPLVDFQKDFKSAVDEF
15643286_Thermotoga_mariti       KVGVALSGGVDSSVALYLLHEVKAFHMKTVIEIIVDVKIEFQKVI
53711506_Bacteroides_fragil      RVLLGMSGGVDSSVAAMLLLYEVTGVTFRFIGHITYDARKVQEQIIDY
53715285_Bacteroides_fragil      RVLVGLSGGIDSTATCLMLQYEVGVTMRVIEHYVADERVFPKDTIV
15606458_Aquifex_aeolic         RVAVGMSGGVDSSVTALLKHDVIRVTLRFIPLVFSWEEIFKSKVIDY
24214187_Leptospira_interr       KIIVAMSGGVDSSAVTAGLLMYEVIGVNLRTIPFYVIKMEKVFQEK
34763143_Fusobacterium_nuclea    KVGVAMSGGVDSSVAAYLLKYDIFGVMTKTIHYVLDVRNEFEKVM
42526204_Treponema_dentic        KVLVGLSGGVDSSVAACKLLIYDVTGVTMQLIKHIVYDMRETFKTEI
6459532_Deinococcus_radiod       RVLGMSGGVDSSVTASLLKYQVIGAMMRFVFPYLLDYREPQRHIVG
67922387_Synechococcus_elong     RVVVGLSGGVDSSVAALLHYAVEGLTL--VPYHVVDSDRDRFQEAIV
71030526_Theileria_parva          HVIIGLGGVDSSVAACLIIYHVTGLNIRVFPVFTLNLAKFARDVVG
15604175_Rickettsia_prowaz       RVLAAMSGGVDSSVAARAVHDVTGVHLALIPFYVWDLAERFETEVID
39934381_Rhodopseudomonas_palu   KVLAMSGGVDSSVAARMVHDVVGVLALIPFYVWDFAEKQEDVIDNF
53795994_Chloroflexus_aurant     TIVVAMSGGVDSSVAAMLHNVIGITLQLIPHYVLDYENKQESVIDNF
94969297_Acidobacteria_bacteri  RVVVAMSGGVDSSATAALLKYDVVGTIQLIPHYVLDYESRFRESVID
39997664_Geobacter_sulfur        -----MSGGVDSSLAALLLHQVTGVTMHLIPFYVFNQYQRFRRH
87306814_Blastopirellula_marin   TIAVAMSGGVDSSVAAMLRYNLVGLTQMLIPYVVNQEDRFVVKPF
149175981_Planctomyces_maris     -----MSGGVDSSVAALLLHEVIGVFMRIIPFYALNLQREFG-QI
49651723_Yarrowia_lipoly        RVVGLAMSGGVDSSAAHLLLYEVIGLFMRSIPFHALNFKDAFG-RIK
8134740_Homo_sapiens             KVVIGMSGGVDSSVSAYLLKYEVIGVTLNQI LHKVNVNIRKDFENIV
21357477_Drosophila_melano       HVVYVAMSGVDSSVTAALMAGRVTVGFMRNIPAVNLSLEKEYWLEVF
RA000086770_Reclinomonas        HVVICALSGGVDSSVAALLLRYQVTGVFMKNIPFHQVSYVKEYW
62184976_Chlamydomonas_abortu    NVVVGVSGGVDSSVAHLLAFKVLGVFMRNVELRQVNVREYWTAVF
HV000042429_Hartmannella_vermif  SVAVGMSGGVDSSVSAYLLKYRVVGVFMRNIECRQVDFVREYVNNV
46447434_Protoclamydia_amoebo    TVVVAMSGGVDSSVVAYLLKYRVLGIFMKNIPYYTVSFAREYRER
106895797_Clostridium_sp        SVVVGLSGGVDSSVSAYLLQYKVRGLYMRNIPYDIVSLEKEYWNLV
52141111_Bacillus_cereus        TVVVGMMSGGVDSSVSALLMKNVIGLFMKNIPYAVNFVENYRQV
15597822_Pseudomonas_aerugi     KVVIGMSGGVDSSVAALLLKYDVVIGFMKNIPYYSVNFKEYWDRV
50121369_Erwinia_carotovora     RVVIGMSGGVDSSVAALLLKYDVIGIFMKNIPYAVNFEKQYWDK
38703944_Escherichia_coli       RVIVGMSGGVDSSVSALLLQYQVEGLFMKNIKLHTANFAAEYWDN
                                  KVIVGMSGGVDSSVSALLQYQVEGLFMKNIELHTVNFAAEYWDN
                                  :*.* ** :
71030526_Theileria_parva          LDDYRKGEVPPNDVLCNSRIKFGFFDYVASGHYATLLCLSNLTKDQTY
34540110_Porphyrromonas_gingiva  VETVRRGLTPNDPDMCNKLIKFGCFDRIATGHYATTLSTAKDPVKDQTD
53712700_Bacteroides_fragil      IEKIRKQTPNDPDMCNKLIKFGCFDRLTATGHYATTLGTAKDPKIQDQTD
CM4720_Cyanidioschyzon_merolae   IDEARRGRTPNPDMCNRIKFGAFYALVASGHYARVLFCSPDIVKQDQTY
116060467_Ostreococcus_tauri     VEEIRRGRTPNPNDVLCNSRVKFGAFFDRVASGHYAAVLVMSYDAGDQDQTY
15223816_Arabidopsis_thalia      IEEYRCGRTPNDPDLNTRIKFGAFYDYGSGHYAKVLELSQDMVKDQTY
149197386_Lentisphaera_araneos   LAELKQGRTPSPDILCNERIKFGAFYDKVATGHYAQVLLRAPDPVKDQTY

```

2688619\_Borrelia\_burgdo  
60464825\_Dictyostelium\_discoi  
116054971\_Ostreococcus\_tauri  
15612319\_Helicobacter\_pylori  
15643286\_Thermotoga\_mariti  
53711506\_Bacteroides\_fragil  
53715285\_Bacteroides\_fragil  
15606458\_Aquifex\_aeolic  
24214187\_Leptospira\_interr  
34763143\_Fusobacterium\_nuclea  
42526204\_Treponema\_dentic  
6459532\_Deinococcus\_radiod  
56752503\_Synechococcus\_elong  
67922387\_Crocospaera\_watsonii  
21674668\_Chlorobium\_tepidu  
68230476\_Frankia\_sp  
15827913\_Mycobacterium\_leprae  
15604175\_Rickettsia\_prowaz  
39934381\_Rhodopseudomonas\_palu  
53795994\_Chloroflexus\_aurant  
94969297\_Acidobacteria\_bacteri  
39997664\_Geobacter\_sulfur  
87306814\_Blastopirellula\_marin  
149175981\_Planctomyces\_maris  
34762114\_Fusobacterium\_nuclea  
49651723\_Yarrowia\_lipoly  
8134740\_Homo\_sapiens  
21357477\_Drosophila\_melano  
RAO00086770\_Reclinomonas  
62184976\_Chlamydomonada\_abortu  
HV000042429\_Hartmannella\_vermif  
46447434\_Proteochlamydia\_amoeb  
106895797\_Clostridium\_sp  
52141111\_Bacillus\_cereus  
15597822\_Pseudomonas\_aerugi  
50121369\_Erwinia\_carotovora  
38703944\_Escherichia\_coli

IEELKNGTSPDIFCNQRIKFGAFYDLVVTGHYAKILKQAKDKIKDQSY  
LKDYKNGLTPNPDVWCNREIKFDLFDVYIATGHYSNLLHRAIDKNKDQTF  
VKAFASGATPNPDLECNRSVKFGLADGLLATGHYARILLRGVDETKDQSY  
INAYEEGQTPNPCALCNPLMKFGLACEKIATGHYARVIOEALDKTKDQSY  
KRDLLKGLTPNPCAHCNRFVFKGYLDFAFASGHYARI IKKGVDLKKDQSY  
IDEYMSGHTPVPCTLCNNQLKWPLLI FYLATGHYVRKIAPAEDVDKQDQSF  
IDEYRQGRTPNPCVMCNPLFKFRMLCDWIATGHYSRLIVAGDDDKDQSY  
VEEYKRGRTPNPCALCNREVKTFGFFIDKLATGHYAKI IKRPKDRKRDQTY  
IEDYQHGKTPNCPVECNFVFKFGLIDKIDKATGHYARI IANGIDVGNQAY  
VNEYMNGRTPNPMVCNRIKFKGMAFMAFGHYTKLLSVGDDSNKDQVY  
VEEYKQGRTPNPCFICNSKIKFGLFFDKIATGHYAKILRQAEADQKDQSY  
LEEYARGRTPNPCVNCNTKVKFDELCRYVATGHYVRRFHRGDDPRKDQTY  
VQGYEAGITPLPCSQCNRAVFKGPMADAIATGHYARILLRAVDRNKDQTY  
VSGYEGSVTPLPCSQCNRAVFKGPMCDRIATGHYARILLRAVDRNKDQSY  
HDDYLAGRTPNPCVMCNKAIKWFGLADLIVATGHYARILLRAVDRNKDQSY  
VADYSAGRTPNPCVRCNERIKFAAVFADVVTGHARLLRRSVDPAKDQSY  
VSAYARGETPNPCVQCNRKIFKFSALFDVATGHYARILLRAVDRNKDQSY  
VDSYLHGRTPLPCVQCNRKSVKFRDLADKLATGHYVRRKLTGLDITTKDQSY  
ADSYASGETPVPICNRSVKFRDLASALATGHYVSSLVCAADRDRDQSY  
IRAYTHGLTPNCPVECNRMKFRALFDVAVATGHYARILLRAVDRNKDQSY  
VEDYLSGRTPIPCSLCNRHLKFDQLAEKIATGHYARNLKRPADRAKDQTY  
VDEYFRGRTPNPCVRCNRVVKFELLADFLATGHYARILLRGVDPKADQSY  
VDEYVAGRTPNPCVMCNWIKFKGLAEYVATGHYARILLRVGDSGKDQTY  
ADEYLAGRTPNPCVMCNWIKFKGLASYSISTGHYAQLLIRGLDRSKDQSY  
LDGYKTGITPSPCII CDDEIKFKILAEYVATGHYTSVLKSVHSI IKDQSY  
LERYRQGRTPNPDVSCNRYIKFGLDWWLATGHYARVLRFRKGLDQDQSY  
LNEYEKGRTPNPDIVCNKHIFKSCFADAIATGHYARILLQAAVSFKDQTF  
LDDYQMGITPNPDILCNRIKFDLFDVAVATGHYARILLIPADTFKDQTF  
LAGYARGITPNADVLCNTHIKFRSLFDWLATGHCCRLLRGVDPNKDQSY  
LKEYSQGYTPNPDVLCNREIKFDLLGDFLATGHYCRLLLRGKDPKDKQSY  
LLDYQRGVTPNPDVACNREIKFKHFADVFATGHYCRM---GIDL-----  
IADFQKGTWTPNPDILCNREIKFKVDFLATGHYCNLVKIDHNKDQTY  
LNEYKAGRTPNPDVMCNKEIKFKAFADYVATGHYAQVLLRGVDTNKDQTY  
LDEYRAGRTPNPDVMCNKEIKFKAFADYVATGHYARVLRGVDNDKDQTY  
LAEYKAGRTPNPDILCNREIKFKAFADLIATGHYVRRLLKGLDPNKDQSY  
LEEYKAGRTPNPDILCNREIKFKAFADYIATGHYVRRLLRGMDGNKDQSY  
LAEYKAGRTPNPDILCNREIKFKAFADYIATGHYVRRLLRGLDSNKDQSY

\* . \* . \* : . \* : \*\*

71030526\_Theileria\_parva  
34540110\_Porphyrmonas\_gingiva  
53712700\_Bacteroides\_fragil  
CM4720\_Cyanidioschyzon\_merolae  
116060467\_Ostreococcus\_tauri  
15223816\_Arabidopsis\_thalia  
149197386\_Lentisphaera\_araneos  
2688619\_Borrelia\_burgdo  
60464825\_Dictyostelium\_discoi  
116054971\_Ostreococcus\_tauri  
15612319\_Helicobacter\_pylori  
15643286\_Thermotoga\_mariti  
53711506\_Bacteroides\_fragil  
53715285\_Bacteroides\_fragil  
15606458\_Aquifex\_aeolic  
24214187\_Leptospira\_interr  
34763143\_Fusobacterium\_nuclea  
42526204\_Treponema\_dentic  
6459532\_Deinococcus\_radiod  
56752503\_Synechococcus\_elong  
67922387\_Crocospaera\_watsonii  
21674668\_Chlorobium\_tepidu  
68230476\_Frankia\_sp  
15827913\_Mycobacterium\_leprae  
15604175\_Rickettsia\_prowaz  
39934381\_Rhodopseudomonas\_palu  
53795994\_Chloroflexus\_aurant  
94969297\_Acidobacteria\_bacteri  
39997664\_Geobacter\_sulfur  
87306814\_Blastopirellula\_marin  
149175981\_Planctomyces\_maris  
34762114\_Fusobacterium\_nuclea  
49651723\_Yarrowia\_lipoly  
8134740\_Homo\_sapiens

FLSRLTQNMOSKLIFFIGHLTKSQVREFAKTVGLPTFDKDKDSFGLCFLDI  
FLAQINFAQISKLMFPIGHLKSEVRAIANAAGLPSAKRKDSQGICFIDY  
FLAQIDYLVQSKLLFPIGGLMKHEVREIALRAGLPSARRKDSQGICFINY  
FLSQLSQOQLKATFPIGDLTKSAVRRALARERYLPNCDRPPDSQGICFLKF  
FLANLTQEQLRVAVFPVGGMPKADIRSLATSAPLNAGRKDSQGICFVKF  
FLSHLSQTLKRLLPGLGCVKKEVVRKATQFDLPNKDRKDSQGICFVKF  
FLSSLSQAQLSRALFPIGSLMKSRVRELAEEYDLPNKVRKDSQGICFISY  
FLSHLSQKQMSKLYFPLGTLKSEVRQIAKNINLNPKNDRKDSQGICFIKY  
FLCMTKGERLQKAIFFPIGGFTKENIVSFAKTIPSKITSKSSRSGICFRPL  
FLASVSGDALSRACFPGLGEMLKSETREARALGLPCAERSAGICFPER  
FLYALEHEVIKLVFPLGDLKDIKPLALNAMLGTETYKESQIEICFKSY  
FLARIEPWIERLIFPNGIYTKEEIRKIAEEAGIHVAKKQESQDVCFPSI  
FLWGLRQEIQRMLLPMGGMTESEARAYAAGRGFEKSKKDSIGVCFIDY  
FLWRLGQDVLRRCIFPLGNYTKQTVRDYLHEKGYEASKEGESMEVCFDY  
FLSLVRRDELELTFPLGAYTKEEVREIAKRYGLEVAQKRDSQEVCF-SP  
YLYGLSQENLKNVIFPLGEMTKPEVRQIARRMGLPVADKSESQIEICFNDY  
FLSQIEKDRLSKIIFFVGDLEKTKLRELAQMGVRYSKKDSQIEICFGKL  
FLALLTQEQLSRSIFPLGDFTKKVRSAIADAGLINAHRPDSQDIFDDY  
FLWGTPRDALPYILFPVGELEKPVREIAAERGLLTAQKPESONICFGKV  
FLYDLPQSVLQSVKFPGLGELTKPETRQIAAELGLRTAEKPESDQLCLGSM  
FLYDLSQDILKGTIFPLGEOQTKETTRIAAEFDLKTASKPESQDLCFLGSM  
FLWMLTQAEALAKTLFPLGGYTKAEVRELARSFGVHAAEKESQIEICFDDY  
VLGTLRPEQLAAARFPLGDSKTAQVREAAARRGLAVADKPPSHDIFCGDT  
VLAVLTAQQLRHAFFIGDTLKRVRAEAARRGLLVADKPPSHDIFCGNT  
FLFTITRQQLYLSFPLGGFTKYETRKLASKFGLDIADKPPSHDIFCGNY  
FLFATTREQLQFLRFPPLGDMTKPQTRRELARQFGLSVADKHSQDIFGRY  
MLHMLGQAELSRLIFPIGAYTKREVREMAAARGLPSADREESQDIFGDY  
FLFLLTQDQLARTLFPPLGEMTKQVRRLAAERGLRVAEKESQIEICFDDY  
VLFVIGREYLRMLLPVGGQFEKSRIRELAGQIGMRVADKKSQIEICFGKH  
VLFVIRNGLLDKIIFFVGGFVKPEIREMAGEAGLRTANKPDSQIEICFNDY  
MLYRLSPDKLERLIFPLKSYKQIEIREIALKIGLEVYDKKDSQGVCFEGY  
YLSVNSDSLNRVMFPLSDYLPKPEIREMAHAYKLVHASKPDSQGLCFRKF  
FLSQVSDALRRITFPLGGLTKFEVVKIAAENRLLHLLQKESMGMCFRNF

21357477\_Drosophila\_melano  
RAO00086770\_Reclinomonas  
62184976\_Chlamydomydia\_abortu  
HVO00042429\_Hartmanella\_vermif  
46447434\_Protoclamydia\_amoeb  
106895797\_Clostridium\_sp  
52141111\_Bacillus\_cereus  
15597822\_Pseudomonas\_aerugi  
50121369\_Erwinia\_carotovora  
38703944\_Escherichia\_coli

FLAGISRKALQRTMFLPLGDFQKSQVKDLAKKIGFQRAKKKESTGICFRNF  
FLCAAPQRGLARTLFPVGGGLKRTQVRQLA-----  
FLCGTHPESLKNVFLPLGDMTKREVRISIAAQAGLATAQKRDSSTGICFRPF  
-----  
FLYTLNQIILQVLFPPVGGLEKSQVRDIARKHQLVTAEKKDSSTGICFRDF  
FLNQLNQYQLSKAMFPVGHLOKDLRQIALDAGLATASKKDSSTGICFRNF  
FLNQLSQQEQLSKTMFLPGLGELKPKQIREMAKEAGLATAAKKDSSTGICFRNF  
FLHAVGGEQIARSLFPVGELEKPEVRAIAEKHGLATAAKKDSSTGICFRNF  
FLYTLNSHEQIAQSLFPVGELEKPEVRAIAEELALATAAKKDSSTGICFRNF  
FLYTLNSHEQIAQSLFPVGELEKPEVRAIAEDLGLVTAAKKDSSTGICFRNF

71030526\_Theileria\_parva  
34540110\_Porphyrromonas\_gingiva  
53712700\_Bacteroides\_fragil  
CM4720\_Cyanidioschyzon\_merolae  
116060467\_Ostreococcus\_tauri  
15223816\_Arabidopsis\_thalia  
149197386\_Lentisphaera\_araneos  
2688619\_Borrelia\_burgdo  
60464825\_Dictyostelium\_discoi  
116054971\_Ostreococcus\_tauri  
15612319\_Helicobacter\_pylori  
15643286\_Thermotoga\_mariti  
53711506\_Bacteroides\_fragil  
53715285\_Bacteroides\_fragil  
15606458\_Aquifex\_aeolic  
24214187\_Leptospira\_interr  
34763143\_Fusobacterium\_nuclea  
42526204\_Treponema\_dentic  
6459532\_Deinococcus\_radiod  
56752503\_Synechococcus\_elong  
67922387\_Crocospaera\_watsonii  
21674668\_Chlorobium\_tepidu  
68230476\_Frankia\_sp  
15827913\_Mycobacterium\_leprae  
15604175\_Rickettsia\_prowaz  
39934381\_Rhodopseudomonas\_palu  
53795994\_Chloroflexus\_aurant  
94969297\_Acidobacteria\_bacteri  
39997664\_Geobacter\_sulfur  
87306814\_Blastopirellula\_marin  
149175981\_Planctomyces\_maris  
34762114\_Fusobacterium\_nuclea  
49651723\_Yarrowia\_lipoly  
8134740\_Homo\_sapiens  
21357477\_Drosophila\_melano  
RAO00086770\_Reclinomonas  
62184976\_Chlamydomydia\_abortu  
HVO00042429\_Hartmanella\_vermif  
46447434\_Protoclamydia\_amoeb  
106895797\_Clostridium\_sp  
52141111\_Bacillus\_cereus  
15597822\_Pseudomonas\_aerugi  
50121369\_Erwinia\_carotovora  
38703944\_Escherichia\_coli

SQYLTKSGPIVEYENKVIETHNGLYNFTIGQKKTINSTPKYVVKDIATN  
NDFIERYGRIIELEGKVIGRHQYWFHTIGQRKGLGGGPPWFVVKDIKRN  
NDFVRRFGAVIEFEGKIGTHRGYWFHTIGQRKGLGGGPPWFVVKDIQDN  
EQFLEHYGPIMAEAGRFLGTHRGFWFYHTIGQRKGLGGGPPWFVVKDLENN  
SEFIAEHGDIIEVEGKVLGKHRYWFHTIGQRSGLFGGPPWFVAGKDCVNN  
SDFVCRHGIIIEAEGDFLGNHRGFWFYHTIGQRQGLGGGPPWFVVKDKNN  
PDFVRFHGDIIIEIEDEKKGEHKGVWFHTIGQRSGLGGGPPWFVVKDLATN  
NEFIKYHGNIIEKEGKIGIHNHYWFYHTIGQRGRIKNGPPWFVIEKDLKKN  
PDFLSQYGDFFDISNSFIKHKHGSVCYTMGQKANIDSERYFIVRSDIERN  
GRVCGRGGRAAAQGGVHGRS-----TRENRRP--AKPWFVIGKNNFEN  
IDTLKKHGVVKNLQGEVIGTHKGYMFTYHTIGQRKGLGPPWFVVKDIKKN  
ENFLKDEGDIITPEGEVVRHGFYPLTYHTIGQRKGLGRRYVVRGKIPEKN  
RSFLKCKGRFLDESNGFIWHEGYPFYHTIGQRRLGNRAVFKIHPETN  
RDFLREGFVDSSEGVKLGQKGFYHTYHTIGQRKGLGKPKYVVKINPKN  
GEYLEGIGLIKHVSGKVLGEHEGVYRYHTIGQRRLGGKPPVYVIDIDAKTN  
RKFLKKGFFLKLKDGIRVGHKGRNFHTYHTIGQRKGLGKPNLYVVISIE-DDG  
KQFLIENGINVDKNGNIGLKHGKGFYHTYHTIGQRKGLGEEPLYVLAFFDKTN  
TRVINALGKFIIDTMGNEIGRHKGLQYHTYHTIGQRRLAGYVYVVKDKAKTN  
QDFVAEHGYIREIAGEVVGELHTQFYHTYHTIGQRKGLGHRVRHVHLDPSN  
RAFLDRYGEIVDQSGRVLGKHTGIHHYHTYHTIGQRKGLGSEPLYVIAIDPION  
STFLDQYGEIVDLEGLKVLGTHQGVHHYHTYHTIGQRRLGPEPLYVVKLDAMN  
CAYLANAGEIVDQAGKVIHHRGYPFYHTYHTIGQRRLGGEPPVYVTEIDAEN  
GAWLRERGPVDAEGEVLGEHDGAYAFYHTYHTIGQRRLGGRPRYVLEISPATS  
RAFLSECGSVVDAAGTVLAEHDGVHGFYHTYHTIGQRKGLGGRPRYVTAIDADTA  
KTVINKIKIVHINGFELGEHSGIINYHTYHTIGQRRLGNEPLYVVKIDPSNN  
TDVVERLGDIVDVGRLGQHPGIVHFTYHTYHTIGQRRLGGRSPLYVLRDLAAQR  
RNLLRIEGPIVDLEGREIGRHRGLPLTYHTYHTIGQRRLGGEPPRYVVAIDPARN  
KKFLDAYGELVTSSEGVVGHHTGIHNFYHTYHTIGQRKGLGGSPLYVIELRGDKR  
VRFLEEGEIVDRKGNVLRHGGTYRYHTYHTIGQRRLGTPLYVYVVDGAERR  
DEFIKSRGEIVTTAGEVVGTHDGIKTYHTYHTIGQRKGLGGEPRFVVRIDAETN  
FGFLNRYGEMVDTSGNVVGHHTYHTYHTIGQRRLGGRPRYVVKIEPETN  
KKFLKENGNYIDKGNILGQHEGYQLYHTYHTIGQRRLGSKPVFITEIKPQTN  
RDFLSQYGFQTLQGNVGVGHHTYHTYHTIGQRRLGGRPRYVVKIEPETN  
EHFLLQYGHFISIEKVLGTHKGFYHTYHTIGQRANIGREPWFVVKDSVKG  
KDFIQEYGFPLDIDGAVVGHHEGIIHQWTVGQRCLSLQPYFVARKEAASN  
-----  
KSFLQEPGEIIDDYQKIVGNHEGAHYHTYHTIGQRRLGDEKPCYVVKDMEKN  
-----  
RSFLSQAQFQTLQGNVGVGHHTYHTYHTIGQRKGLGGEAWFVVKDHERG  
KEFLSNYGKIISLDGEVKGKHDGLMYHTYHTIGQRKGLGGEPPWFVVKDLKKN  
KDFLSNYGVMQTLGSEVKGKHDGLMYHTYHTIGQRHGLGDDPWFVAVGKLNKEN  
TDFLKQYGDIEETEGKVIGRHSLMYHTYHTIGQRQGLGDDPWFVVGKDLQRN  
TDFLARYGPILSVDNKPMPQHQGLMYHTYHTIGQRKGLGDEPPWFVVKDVAEN  
REFLGRYGIITVDGDEIGEHQGLMYHTYHTIGQRKGLGGEPPWFVVKDVENN

71030526\_Theileria\_parva  
34540110\_Porphyrromonas\_gingiva  
53712700\_Bacteroides\_fragil  
CM4720\_Cyanidioschyzon\_merolae  
116060467\_Ostreococcus\_tauri  
15223816\_Arabidopsis\_thalia  
149197386\_Lentisphaera\_araneos  
2688619\_Borrelia\_burgdo  
60464825\_Dictyostelium\_discoi  
116054971\_Ostreococcus\_tauri  
15612319\_Helicobacter\_pylori  
15643286\_Thermotoga\_mariti  
53711506\_Bacteroides\_fragil  
53715285\_Bacteroides\_fragil  
15606458\_Aquifex\_aeolic

TLVSVKLRHTPNYSQCFLKHPDGTISTGQYCVFYCIGSAKM  
IILVSKIRHTPEFTRGLESEERIQIAPGQYCVIYCYGSGMI  
IIYVSKIRHTPEFIKGIISSEKLOGIAPGQYFVYICFGSGEI  
IIVLVSVKIRHGPRSVSAIALDEPESGAPGQYFVYICLGGGVI  
VVYVTVKVRHGENIYSCVTINQDDQGLAPGQYAVFYCLGCGKI  
VVFVSKVRHGPFGFYSCVHLDEDDQGLAAGQFAAFYICGSGVI  
IVYISVKLRHGPQLVEAIKLAEKDKGIAPGQSCIFYCLGRGVI  
IYISIKIRHGEKKYCSISLNNKDDQGISPGQFAIFYCLGGAKI  
IVYVCGICRHRGDVNVNLDQPLRSVASGQILCLFCFGGVI  
VVYVAAKARYASPLTPVATFPDAPERAVTPGQALVYLCLGGAVI  
ELIVGKARYRSVPTKAVEFKEFFYGVAKGQALVVYLLGGGVI  
VVVVSRCVRKKSEAPAVSFEKVFVAVTPGQIAAFYLLGGAI  
EVLVAVKIRYRKQENHCIRLHEPLSAIAEGQAAAFYLLGGGII  
TVMLGVRIRYRSRPIPCVRFLEASAIAPGQYSAFVYLLGGAFI  
TLIVGAQIRYRHKVPVVKFKEDVVRGIPGQVAVFYLLGGGII

|                                |                                                 |
|--------------------------------|-------------------------------------------------|
| 24214187_Leptospira_interr     | SVILGVVRYRHIPIRCVPHPLEDRVGVTPGQSAVFYLLGGII      |
| 34763143_Fusobacterium_nuclea  | NIIVGAKTRSRDILHKCVKFDNKVRAITPGQGIVFYVIAGGFI     |
| 42526204_Treponema_dentic      | TVTIVGVKTRYRQOKKKAVERFIEPEKVAEGQAQAVFYIIGGGII   |
| 6459532_Deinococcus_radiod     | TWVVGVQVRYRTAPVKALEFAEPQFAVAPGQSAVLYLLGGGLI     |
| 56752503_Synechococcus_elong   | RVVVGVQVRYRSAPVPCILFADPQFSITPGQAQAVVYLLGGGLI    |
| 67922387_Crocospaera_watsonii  | RVIVGVQVRYRSKAVRVLQFNEPQFGITPGQAQAVFYVLLGGGII   |
| 21674668_Chlorobium_tepidu     | RIHVGARIRYRDQSQACVSVFREPQGVACGQAVVYVLLGGGII     |
| 68230476_Frankia_sp            | TVTIVGAQVRAHGGVVPVAVRLAEPVVRGTAAGQAVVYVLLGGGRI  |
| 15827913_Mycobacterium_leprae  | TVYVGVQIRAHGETAVAVRLCEPLRGVARGQTLVLYVLLGGSATI   |
| 15604175_Rickettsia_prowaz     | IVYVGVKIRSTRPPCHAVKFLSKEKAVAPGQACVIYVLLGGGWI    |
| 39934381_Rhodopseudomonas_palu | QVVVGVVVRSTRAPQPAVELVVGEEGVSPGQACVFYVLLGGGFI    |
| 53795994_Chloroflexus_aurant   | ALIVGVQVRAHAEPPLPAVELERPQRAVSPGQAQAVFYVLLGGGWI  |
| 94969297_Acidobacteria_bacteri | QVVVGAQIRHKHEPAWAVTFDDPQRAVTPGQAVVLYVLLGGGWI    |
| 39997664_Geobacter_sulfur      | QVIVGCKIRYRHQPVPCVRFROPEKSVTPGQAQAVFYVLLGGGWI   |
| 87306814_Blastopirellula_marin | QVVVIGAQIRYNSDDAPAVTFDEPRRGVAPGQAQAVVYVLLGGGWI  |
| 149175981_Planctomyces_maris   | RVVVIGAQIRYQHKEADCVTFFDPEYGVAPGQAQAVVLYVLLGGGWI |
| 34762114_Fusobacterium_nuclea  | EIVLGARPRFSSTGFYGFKYNEENTHNAKGQHIVFFVLLGGGEEI   |
| 49651723_Yarrowia_lipoly       | ELVIVLTIQFRSLMEPVIRTAVPVRAVSPGQNLVLYVLLGCGVI    |
| 8134740_Homo_sapiens           | DVVFVAFRFRHQMALVPCVTVAVQAVRALATGQFAVFYCLGSGKI   |
| 21357477_Drosophila_melano     | TIYVAFRFQHTKPLVDCVELDAPLRAITPGQYAVFYCLGSARI     |
| RA000086770_Reclinomonas       | -----                                           |
| 62184976_Chlamydomydia_abortu  | IVYIVAKVRYRSPDEECVRFVTPVKAITPGQTIQAFYCLGGGII    |
| HVO00042429_Hartmanella_vermif | -----                                           |
| 46447434_Protoclamydia_amoeb   | IVFVESKVRVRYRQNDQFCVTFDRPQRAVTPGQSAVFYCLGGGVI   |
| 106895797_Clostridium_sp       | ILYVTAQFRYRQPDQGVVMFDEPQKAITPGQAQAVFYCLGGATI    |
| 52141111_Bacillus_cereus       | ILYVDAKFRYRQEDNKVILCDEPIRAITPGQAQAVFYCLGGATI    |
| 15597822_Pseudomonas_aerugi    | VLLVGAQVRYRQSDQCAVDFDEPQRAVTPGQSAVYVLYCLGGGVI   |
| 50121369_Erwinia_carotovora    | ILYVAVKTRYRQADISCVRFDEPFAAVTPGQSAVFYCLGGGII     |
| 38703944_Escherichia_coli      | ILIVAVKTRYRQTDIPCVIFDEPVAAVTPGQSAVFYCLGGGII     |

**Note:** This gene appears to be restricted to bacteria and eukaryotes. All top hits of GenBank searches are from *Borrelia*, *Lentisphaeria*, and CFB bacteria. Protein product of the *Arabidopsis* sequence (GenBank accession number NP\_175542 and TAIR locus AT1G51310) is localized in both chloroplasts and cytoplasm. The major eukaryotic sequence group contains some mitochondrial precursors (e.g. *Homo* sequence) and is likely of mitochondrial origin, although it is not particularly related to alpha-proteobacterial homologs. Please also note that the green alga *Ostreococcus* contains two versions of this gene, one of which groups with the eukaryotic mitochondrial clade while the other version with sequences of red algae, *Theileria*, CFB bacteria, and spirochaetes. Sequences of *Reclinomonas* and *Hartmanella* were obtained from TBestDB; these two sequences formed a group with *Homo*, *Dictyostelium*, and other eukaryotic sequences in preliminary phylogenetic analyses, but were excluded from detailed phylogenetic analyses because of their short length. *Theileria* is an apicomplexan parasite containing a plastid derived from an algal endosymbiont.

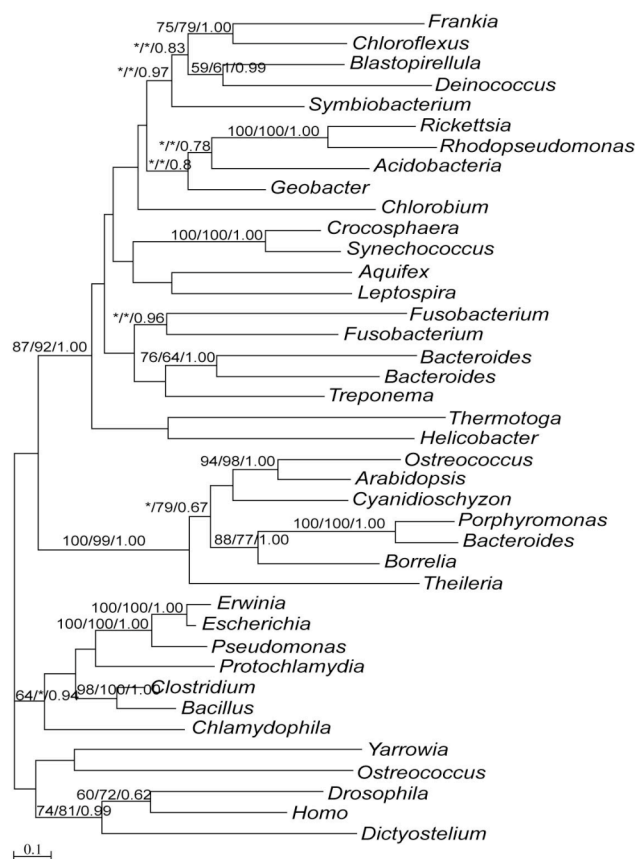

**Figure 21.** Molecular phylogeny of tRNA methyltransferase. P-value = 0.977 from AU test for the presented tree. AU tests were also performed on alternative topologies including (A) monophyly of all eukaryotic sequences, and (B) monophyly of cyanobacterial, red algal, and green plant sequences. These alternative topologies investigate if red algae and green plants acquired the genes from mitochondria or plastids respectively. P-values < 0.001 from AU tests for both alternative topologies.

## 22. Isoleucyl-tRNA synthetase (D)

CLUSTAL X (1.83.1) multiple sequence alignment

```

118193839_Cenarchaeum_symbio      VRSHLEGADL--DRMIVMFIIEGPPTMNGPPHAGHLRGRVIKDLWYRYNTLR
6325217_Saccharomyces_mt         LvyKEQLRDFFEFSFILHDGPPYANGELHLGHALNKILKDIINRYQLSQ
66800699_Dictyostelium_mt        LLK--DPYKLYKWQLWVFDGPPYANGDLHMGHALNKILKDIVNRYKVLK
118751535_Marinomonas_sp.       MLKRWQDMDLyQKVRFILHDGPPYANGSIHIGHAVNKILKDIIVKSKTVS
46129096_Haemophilus_influe     MLKNWYEKNLYQKIRFILHDGPPYANGNIHIGHAVNKILKDI IKSKTAL
75237181_Escherichia_coli       MLARWTDDDLyGIRFILHDGPPYANGSIHIGHSVNLKILKDI IKSkgLS
47572014_Rubrivivax_gelati     WVKQWEQQGTyQRLRFVLHDGPPYANGQLHIGHALNKVLKDMIVKARQLA
1174519_Pseudomonas_fluorescen  ILQRWNSIGLyGKLRFLHDGPPYANGTIHIGHALNKILKDMILRSKTLs
83594296_Rhodospirillum_rubrum  ILARWEKLDIyARLRFVLHDGPPYANGHLHNGHALNKILKDVITRSQOML
94968888_Acidobacteria_bacter   MLARWEEQRIyELIRyILHDGPPYANGPIHLGHALNKCLKDFVVKSKTMA
15644113_Thermotoga_maritima    FLEEWEMDLYNyVLFVLHDGPPYANGHIHIGTALNKILKDIVVKYKTMR
15605834_Aquifex_aeolic         ILEKWK--GLYEKIQFVLHDGPPYANGHIHVGHALNKILKDVINKYNLLI
116747573_Syntrophobacter_fuma  ILEKWEAMGLyDMLRYILHDGPPYANGHIHLGTALNKILKDMIVKSQMS
116057018_Ostreococcus_tauri    MQEWWRERGVyETLRFVLHDGPPYANGDLHIGHALNKILKDFVNRWEMMN
CM546_Cyanidioschyzon_merolae  IQRFWENRIyEGLyFLLDGPPYANGSLHMGHALNKILKDIINRYFILC

```



33239720\_Prochlorococcus\_marin  
22327660\_Arabidopsis\_cp  
56751678\_Synechococcus\_elonga  
113477079\_Trichodesmium\_erythr  
67921387\_Crocospheera\_watson  
34763705\_Fusobacterium\_nuclea  
47570310\_Bacillus\_cereus  
46852147\_Homo\_mt  
24665024\_Drosophila\_melano  
149179295\_Planctomyces\_maris  
18312756\_Pyrobaculum\_aeroph  
70606414\_Sulfolobus\_acidoc  
14600670\_Aeropyrum\_pernix  
84490249\_Methanosphaera\_stadtm  
11498241\_Archaeoglobus\_fulgid  
14521127\_Pyrococcus\_abyssi  
75401346\_Pseudomonas\_fluoresce  
102191610\_Rickettsia\_canade  
116670944\_Arthrobacter\_sp.  
15827608\_Mycobacterium\_leprae  
54023744\_Nocardia\_farcin  
19074910\_Encephalitozoon\_cunic  
51599084\_Borrelia\_garini  
42528163\_Treponema\_dentic  
46446128\_Protochlamydia\_amoeba  
89898154\_Chlamydomydia\_felis  
118749311\_Marinomonas\_sp.  
68130224\_Leishmania\_major  
CM4722\_Cyanidioschyzon\_merolae  
118380025\_Tetrahymena\_thermo  
23619270\_Plasmodium\_falcip  
71076452\_Giardia\_lamblii  
42523714\_Bdellovibrio\_bacter  
6319395\_Saccharomyces\_cerevi  
66816517\_Dictyostelium\_discoi  
24668543\_Drosophila\_melano  
94721239\_Homo\_sapient  
116061521\_Ostreococcus\_tauri  
30681405\_Arabidopsis\_thalia  
67481173\_Entamoeba\_histol  
57157197\_Trichomonas\_vagina  
48477483\_Picrophilus\_torrid  
84029573\_Thermoplasma\_acidophi  
60681847\_Bacteroides\_fragil  
83815822\_Salinibacter\_ruber  
21673150\_Chlorobium\_tepidu  
111221641\_Frankia\_alni  
28210025\_Clostridium\_tetani  
47570085\_Bacillus\_cereus  
87311784\_Blastopirellula\_marin  
94985204\_Deinococcus\_geothe  
76261183\_Chloroflexusaurant

LQQFWKEKIDFELGFTLHDGPPYANGNLHMGHALNKILKDI INKYQILK  
LQKLWEENOVFKRVSFILHDGPPYANGDLHMGHALNKILKDI INRYKLLQ  
IQQFWADRQIYETLSFVLDHGGPPYANGALHMGHALNKTLKDI INKYQLLQ  
LQKFWAQEQIYERLSFTLHDGPPYANGNLHIGHALNKILKDI INRYQILQ  
LQKFWADNQIYEKLSFVLDHGGPPYANGSLHMGHALNKTLKDI INKYKLMR  
YIKKWTEEKIYEKGLFVLDHGGPPYANGNTHIGHALNKILKDI IVKYKFTFR  
MQEKWAEMNIYEKVFVLDHGGPPYANGDIHMGHALNKVLDKDFIVRYKSM  
IQQKCGFSELYSWQRFCLHDGPPYANGDPHVGHALNKILKDIANRFHMN  
RLNKIAVSYAYQEQRFVLDHGGPPYANGQLHMGHAVNKILKDI TLRQRVAH  
ILKFWEVNQTFDQLRWSFIDGPMANPMGVHAWGRAYKDAYQRYAM  
VEEFWRNRIRIFEKWKFTFLEGGPPTTNGMPHVGHIRGRYKDVVIRFYRL  
VLKYWDDNIIYKLLKFLFIDGPPYPSSPHIGTVWNKTIKDCILRYERLM  
VKSWEENSIIYKVKFYFLDGGPPYASAKIHIGTAWNKKVVDVLRFRYRMT  
IQSFWEQENDIYNKTSYFSDGPPYCSGRIHLGTAWNKTIKDSFLRYKSMN  
IFKFWEDNDIYKVKFYFVDGPPYTTGRIHLGTAWNKKVLDKDFILRYKRM  
VEKFWSENEIYKVKFYFLDGGPPYVSGAIHLGTAWNKKI IKDMIIRFRMTQ  
VLERWEKEKTFEQSIYVFDGPPFATGLPHYGHILTSYIKDVI PRYQTM  
ILKFWQDNIIYKLLKFLFIDGPPYFANGLPHYGHLLTGFIKDVYARYQTIK  
ILKYWDQDGTFAQSIFVFDGPPFANGLPHYGHLLTGyakDLVGRYQTR  
VLDYWSNDDTFRASIIYVFDGPPFANGLPHYGHLLTGyVVDKIVPRYRMT  
VLEAWAADDTFRASIFVFDGPPFANGLPHYGHLLTGyVVDKIVPRFQTM  
VLEYWRNKSFERSCTFFYDGGPPFATGLPHYGHLLSGTIKDVVTRFYQ  
ILKFWNDNKIFEKSMFTFYDGGPPFATGLPHFGHFVNPNTIKDIIPRYQTMK  
VLKFWKENDVFKSVYIFFDGPPFATGLPHFGHFVNPNTIKDIIPRYQTMK  
VLKFWQEQGLFERSVFTFYDGGPPFATGLPHYGHILAGTIKDVVLRKYTMK  
ILDFWKTQNIYKLLKFLFIDGPPYFANGLPHYGHLLTGFIKDVVGRFATMD  
VLTFWQDKQIFKRSLYVFDGPPFATGLPHGHLLVASTIKDIIPRYQTMK  
VLAMWHEKDCFRSTMSFSDGPPFATGLPHYGHILAGTIKDMVTRFAYQT  
VLSFWNDSRAFERSNFTFYDGGPPFATGLPHYGHLLAGTIKDVVTRAYQT  
ILKFWDEINAFKQQLFTFYDGGPPFATGLPHYGNLLAGTIKDVVCRYSQ  
ILKYWEDIDAFNLSNYIFFDGPPFATGLPHYGHLLAGTIKDVVTRFYQS  
MLNYWDQIQAFETQLFNFDGPPFATGLPHYGHLLAGTIKDVVCRYSMN  
ILDFWQEQKIFAQSLYFSDGPPFATGLPHYGHLLAGVLKDVVPRYWTM  
VLSLWDEIDAFHTSLFSFFDGGPPFATGLPHYGHILASTIKDIIPRYATMT  
ILKYWDDIKAFETSVYFSDGPPFATGLPHYGHILAGTIKDIIPRYAHQT  
VLQKWRHENIFEKCSYTFYDGGPPFATGLPHYGHILAGTIKDIIPRYAYQ  
ILEFWEFNCFEQLECFYDGGPPFATGLPHYGHILAGTIKDIIPRYAHQS  
VLKLWEEIDAFQQLFVFDGPPFATGLPHYGHLLAGTIKDIIPRYFASTT  
VLSFWTEIDAFKTLQYIFFDGPPFATGLPHYGHILAGTIKDIIPRYQTM  
VIEFWKIDVFNKCNFSFYDGGPPFATGLPHYGHLLAGTIKDVVCRYAIQT  
-----GTPHYGHILAGTIKDVVTRAYQT  
ILNYWKENHIDENIIFAFLEGGPPTANGRPHVGHLMTRAVKDTVMRYKYM  
ILKYWKDNILEKILFVLEGGPPTANGRPHIGHAMTRTIKDIIPRYNTMT  
VLKKNWENOVFAKSMFVFEFEGPPSANGMPGIHVMARSIKDIFCRYKTM  
VLDWQDQNIYKLLKFLFIDGPPYFANGLPHYGHLLAGTIKDVVTRAYQ  
IREFWIERNIFRKSLSYFYEGLPPTVNGKPGVHHLFSRTIKDVVCRYHTM  
TLARWRDAKVHRSLSWVYFEGPPTANGKPGAHVVEARVFDLFPYRYTMK  
VLDFWNKNNIYKLLKFLFIDGPPYFANGLPHYGHLLAGTIKDVVTRAYQ  
IRKQNVNQSIYKLLKFLFIDGPPYFANGLPHYGHLLAGTIKDVVTRAYQ  
VLDFWKSKQIYKLLKFLFIDGPPYFANGLPHYGHLLAGTIKDVVTRAYQ  
ILNFWQENRIFEQTFVYFEGPPTANGRPHVGHLLAGTIKDVVTRAYQ  
VIAWWEANNIVAKSLFVYFEGPPTANGRPHVGHLLAGTIKDVVTRAYQ

\*\*

118193839\_Cenarchaeum\_symbio  
6325217\_Saccharomyces\_mt  
66800699\_Dictyostelium\_mt  
118751535\_Marinomonas\_sp.  
46129096\_Haemophilus\_influe  
75237181\_Escherichia\_coli  
47572014\_Rubrivivax\_gelati  
1174519\_Pseudomonas\_fluorescen  
83594296\_Rhodospirillum\_rubrum  
94968888\_Acidobacteria  
15644113\_Thermotoga\_maritima  
15605834\_Aquifex\_aeolic  
116747573\_Syntrophobacter\_fuma  
116057018\_Ostreococcus\_tauri  
CM546\_Cyanidioschyzon\_merolae  
33239720\_Prochlorococcus\_marin  
22327660\_Arabidopsis\_cp  
56751678\_Synechococcus\_elonga  
113477079\_Trichodesmium\_erythr

GKRVIFNAGWDTQGLPVELQVQKELGVMGIEKLVAECKALVGVQVQWKE  
GKYIFYPGWDCGHLPIEIKALKDLSAISPLKIRSMALKHAQKAIKRWKE  
GFKVNIYPGWDCGHLPIEQQAFKLLKMKASDIRKIAGDFARKEIEKQSK  
GFDAPYIPGWDCGHLPIEHKVEQLIGKVSYKEFRACKREYAYTQIEEQKK  
GFDSPYIPGWDCGHLPIELKVEGLVGIISAAEFROKREYASEQVEGQKK  
GYDSPYIPGWDCGHLPIELKVEQYEGKFTAAEFRACKREYAYTQVQVQK  
GYDALYVPGWDCGHLPIENQIEKLGRLGRDEVOAKSRAYATEQIEQORA  
GFDAPYVPGWDCGHLPIEHKVEVETVYKGLGADKTRELCRAYATEQIEGQKS  
GKDANYVPGWDCGHLPIEWKIEERYAIDVIEFRRECRQFAEWIAIQRE  
GFDAPYIPGWDCGHLPIEIKVDEQLGRMDPLDVAACAKYALKYLDQRE  
GYRAPHVPGWDCGHLPIEHRVSQELGEMSPAERIRKCEEFALRFVDIQRE  
GKNVNIYPGWDCGHLPIERAVEKELSKLPKTEFRELREYAKYVNIQRN  
GKNVYVPGWDCGHLPIEHQVDKELGKMSQVEIRRHCRKYAEKFIQRE  
GKNVYVPGWDCGHLPIELKVLQSMALPTIKLRYKAKAFKTKVKAQRE  
GKRVRFVPGWDCGHLPIELKAVQSARSLDPLQIRLLARKFALBAIEQK  
GSKVRFVPGWDCGHLPIELQVLKTLDRLTPIKLRKKAAYAHKQIALQK  
NYKVYVPGWDCGHLPIELKVLQSLDQTLPLKLRKAKAFKATVKTQRE  
GRKRVYVPGWDCGHLPIELKVLQELSSLTPLTLRQKAKAYALAQVEQSQ  
GRKRVYVPGWDCGHLPIELKVIQNIKSLTPIELRRKARDFALETIDQRE

67921387\_Crocospaera\_watson  
34763705\_Fusobacterium\_nuclea  
47570310\_Bacillus\_cereus  
46852147\_Homo\_mt  
24665024\_Drosophila\_melano  
149179295\_Planctomyces\_maris  
18312756\_Pyrobaculum\_aeroph  
70606414\_Sulfolobus\_acidoc  
14600670\_Aeropyrum\_pernix  
84490249\_Methanosphaera\_stadt  
11498241\_Archaeoglobus\_fulgid  
14521127\_Pyrococcus\_abyssi  
75401346\_Pseudomonas\_fluoresce  
102191610\_Rickettsia\_canade  
116670944\_Archaeobacter\_sp.  
15827608\_Mycobacterium\_leprae  
54023744\_Nocardia\_farcin  
19074910\_Necephalitozoon\_cunic  
51599084\_Borrelia\_garini  
42528163\_Treponema\_dentic  
46446128\_Proteochlamydia\_amoeba  
89898154\_Chlamydomytila\_felis  
118749311\_Marinomonas\_sp.  
68130224\_Leishmania\_major  
CM4722\_Cyanidioschyzon\_merolae  
118380025\_Tetrahymena\_thermo  
23619270\_Plasmodium\_falcip  
71076452\_Giardia\_lambli  
42523714\_Bdellovibrio\_bacter  
6319395\_Saccharomyces\_cerevi  
66816517\_Dictyostelium\_discoi  
24668543\_Drosophila\_melano  
94721239\_Homo\_sapient  
116061521\_Ostreococcus\_tauri  
30681405\_Arabidopsis\_thalia  
67481173\_Entamoeba\_histol  
57157197\_Trichomonas\_vagina  
48477483\_Picrophilus\_torrid  
84029573\_Thermoplasma\_acidophi  
60681847\_Bacteroides\_fragil  
83815822\_Salinibacter\_ruber  
21673150\_Chlorobium\_tepidu  
11221641\_Frankia\_alni  
28210025\_Clostridium\_tetani  
47570085\_Bacillus\_cereus  
87311784\_Blastopirellula\_marin  
94985204\_Deinococcus\_geothe  
76261183\_Chloroflexus\_aurant

GHKVRYVPGWDCGHLPIELKVLQSMKSLTPLKLRKASDFALKTQQEQAK  
GYKSPYVPGWDTGHLPIELQVVEVGVMSALEIRQLCEKYARKWVGIQEK  
GFCAPYVPGWDTGHLPIEQALTNK-GVMTVAEFRKLCAEYAYEQVERQRE  
GSKIHFVPGWDCGHLPIEIKVLSSELGRLSAMEIRKKARSFAKAAIEKQKS  
GQRVNYIPGWDCGHLPIELKATS---QSAQEIQRKSRFAFAWAIAIKSQKE  
GHLELRQNGFDCQGLWVEVEVEKELGYHGIDKFNVECKKRVLRFAARQTE  
GYDVMVQGGWDMQMPVEVEVEKELKLFLEKFALECNLSLVEEYLAYWRE  
GYSVKDQPGYDTHGLPIEVETEKRLGIVGVNDFISKCKEFAVNNKSLTQ  
GYNVWDKPGYDTHGLPIEVKIEQSLGVVGVENFIAACKRFVDENMEAMTR  
GYSLRQAGWDTGHLPIEHKVEELLDIYGIDNFVEKCKEFAIKNKEDMTQ  
GFAPTDTPGWDMHGLPIEVKVEQELGFFGIDKFIERCNMNYALANKDAMTE  
GYNVWRQPGYDMHGLPIEVKVEQALGLIGVENFIKKCKEFAVNNKIMTE  
GKQVPRRWGDCGHLPIEVFEVEKAMGFFGVEQFNDECRELVLYADWRG  
GKKVRRRFGWDCGHLPAEMQSEQLGIFSIKFNHSCRASVMKYTGWEWQ  
GRVVRRFPGWDTGHLPAELAMKQLGMMGIDKFNADCRASVMKYADEWKS  
GKVVRRRFGWDTGHLPAELEVERQLGIMGIAAFNEACRKSVLRYTEWQA  
GKRVDRRFGWDCGHLPAEIEAEKQLGIMGLAEFNAACKSSVLRYTGWRD  
GYDVMRFGWDCGHLPIEVYEIDKLLGIMGIGYNAECRGIYVMKYSEWEA  
GKYVKNRFGWDTGHLPIEVYEVEKLLGIYGIENFNKECKKIVLRYTEWKN  
GFRVRRRFGWDCGHLPIEVNLEIEKELGLYGDIFNEACRASVLRVYKWEWQ  
GFCAPRRFGWDCGHLPIEVNIEKTFGLFGIAKFNNEECRNIVLRYTEWKF  
GYVVRRFPGWDCGHLPIEVYEVEKSLNLFVAKFNNEECRGIYRYVDEWES  
GFHVRRFPGWDCGHLPIEHEIDKSLGMLGIARYNAECRGIYQRYASEWEK  
NHHVIRRFPGWDCGHLPIEVYEIDKMLGILGIDKYNDECKKIVTRYVGEWRK  
GYQVPRRFGWDCGHLPIEVYEIDQKLGILSIAAYNEECRIVLRYSEWGER  
GKVVRRRFGWDCGHLPIEVYEIDKLLGIMGVKYNACRSIVMRYAQEWSR  
NFYVRRRFGWDCGHLPIEVYEIEKENNIMGIDVYNEKCRGIVLKYSEWVA  
RRYVNRFRFGWDCGHLPIEVYEDKMLDVIIRKYNQTCRSIVMRYSQEWEA  
GYTVPRRFGWDCGHLPIEVYEINKTHKIMGVANYNDACRSIVKRYSTEWKT  
GHHVRRRFGWDTGVPLEHIIIDKLLGIYGLNENNECRSIVMTYASDWRK  
GHHVRRRFGWDCGHLPIEFIDKLLHGMGIPYTYNQHCRSIVMKYSEWEI  
GYHVDRRRFGWDCGHLPIEVFEIDKLLNIMGIAAYNAECRIVMRYADEWEN  
GFHVDRRFGWDCGHLPIEVYEIDKTLGIMGITEYNNQCRAIVMRYSAEWKS  
GKHVRRRFGWDCGHLPIEVHEIDKLLKILGIANYNEECRIVLRYSAEWK  
GHHVTRRFGWDCGHLPIEVNIDKLLNIMGIDKYNNEECRSIVTRYVAWEK  
GHRVDRRFGWDTGHLPIEFIDKLLGILGIPKYNQECRNIVMRYSEWKK  
GHSVPRRFGWDTGHPVPEHEVDKMLNIMGIGYVNEKCRSIVMKHQDWER  
GHDILRRFGWDCGHLPIEVLEAEKHGFFGIEKFNQYCRDSVFRYIDEWNI  
DHKIYRRVPGWDCGHLPIEVLEAEKHGFFGVEKFNQYCRSIFRYIDEWKO  
GYQVRRKAGWDTGHLPIEVLEAEKSLGIIISVAEYNAHCRQDVMKFTKEDW  
GYQVDRKAGWDTGHLPIEVIEVEEELGLYIEKYNACRGSVLDKLDWN  
GYQVPRKAGWDTGHLPIEISVEKLLGLYGVGFNREARALVHHIDDWGK  
GFHVPRRAGWDCGHLPIEVLEAEKELGFGYIAEFNARCRESVLRHVADFSA  
GYKVLRRKAGWDTGHLPIEVLEIEKLLGIFGVEEPIKCKDSVFTYSSMWKD  
GYKVLRRKAGWDTGHLPIEVLEAEKQLGIGYIEPFIKCKESVFTYKQWRE  
GYCERKAGWDTGHLPIEVVEVCKEMGIFGIEPFIHKCQASVWRYMOWEWE  
GYFVTRKAGWDTGHLPIEISVEKLLGLEEELFNRLCRASVWETIQEWNT  
GYRIIRREGWDTGHLPIEIEKLLGFFGIAEFNRLCRRESVWEYIQEWKA  
\*:\* :\*: \*

118193839\_Cenarchaeum\_symbio  
6325217\_Saccharomyces\_mt  
66800699\_Dictyostelium\_mt  
118751535\_Marinomonas\_sp.  
46129096\_Haemophilus\_influe  
75237181\_Escherichia\_coli  
47572014\_Rubrivivax\_gelati  
1174519\_Pseudomonas\_fluorescen  
83594296\_Rhodospirillum\_rubrum  
94968888\_Acidobacteria\_bacter  
15644113\_Thermotoga\_maritima  
15605834\_Aquifex\_aeolic  
116747573\_Syntrophobacter\_fuma  
116057018\_Ostreococcus\_tauri  
CM546\_Cyanidioschyzon\_merolae  
33239720\_Prochlorococcus\_marin  
22327660\_Arabidopsis\_cp  
56751678\_Synechococcus\_elonga  
113477079\_Trichodesmium\_erythr  
67921387\_Crocospaera\_watson  
34763705\_Fusobacterium\_nuclea  
47570310\_Bacillus\_cereus  
46852147\_Homo\_mt

ADRLGLVSLNQDKAYWYTRDDFIEREWQVLKANERGIQVDFTVIAYCP  
TFQHFALITDWTTPYLTMDDKYEINQNLNFKEMYERGLIKRONKPVYWG  
GFQEMGILGDWENPYKTLDYGYEVEQIQTFYDMFNKGYIYRGVQPVHWS  
DFIRLGVMGDWDENPYLTMNFQTEANIIRALGKIAENGLLVGKFPVYWSV  
DFIRLGLVLDWDPYLTMTNFQTEANIIRTLGKVIENGLHYKGSKPVHWC  
DFIRLGLVLDWSDHPYLTMTDFKTEANIIRALGKIIGNGLHKGAKPVHWC  
DFKRLGVLGAWDQPYRTMDFGNEAGEIRALKRVMERGFVYRGLKPVYWCF  
EFIRLGLVGEWDPYKTMNFKNEAGEIRALAEIVKGGFVFKGLKPVNWC  
EFKRLGITGDWKRYPYTMFAFAEAQIVRELKFLMAGDLYKGAKPVLWS  
QFKRLGVGQWDPYSTMTPPEYESVLRIFDYDFLEQGAIVYKGLRPVYWC  
EFKRLGVRGDWENPYITLKPDEYEVKILDVFKTLVEQGNVYRSKPIYWCP  
DFVRLGLVGDWHPYLTMDPKYEAQEIRELKGFERGLAYRSKPKPVYWC  
EFRRLLGVGEWNNPYLTMSYDYEASIARELGRFFQEGGVIRSKKPIYWCT  
QFKRYGVWADWEDDPYMTLLPEYEAQAQEVFQSMFLNGHIYRGGKPVHWS  
GFKRYGVWGTWNPYLTLDHQAQVRIFGEMFLKGYIYRGRKPVYWSP  
GFRRWGIWADWDPYLTLOQYEAQAQIKLFGEMAFKGYIYRGLKPVHWS  
SFKRFGVWADWNNPYLTLDPEYEAQAQIEVFGQMALKGYIYRGRKPVHWS  
SFKRYGVWADWDAPYLTLPYEAQAQIDVFGQMVKGYIYRGLKPVHWS  
SFKRYGVWGDWHPYMTLSPEYEAQAQIGVFGKMLKGYIYRGLKPVHWS  
AFKRLGVGDWHPYLTLPYEAQAQIGVFGEMALKGYIYRGLKPVHWS  
QFIRLGLVLDWDPYLTLDPRFEAKQLFGEIYENGYIFKGLKPVYWS  
QFKRLGVRADWDPYITLPEYEAQAQIKVFGDMAKKGYIYKQKPVYWS  
AFIRWGMADWNNCYTFDGYEAKQLRTFYQMYDKGLVYRSYKPVFWS

24665024\_Drosophila\_melano  
149179295\_Planctomyces\_maris  
18312756\_Pyrobaculum\_aeroph  
70606414\_Sulfolobus\_acidoc  
14600670\_Aeropyrum\_pernix  
84490249\_Methanosphaera\_stadt  
11498241\_Archaeoglobus\_fulgid  
14521127\_Pyrococcus\_abyssi  
75401346\_Pseudomonas\_fluoresce  
102191610\_Rickettsia\_canada  
116670944\_Arthrobacter\_sp.  
15827608\_Mycobacterium\_leprae  
54023744\_Nocardia\_farcin  
19074910\_Encephalitozoon\_cunic  
51599084\_Neurelia\_garini  
42528163\_Treponema\_dentic  
46446128\_Protochlamydia\_amoeba  
89898154\_Chlamydomyces\_felis  
118749311\_Marinomonas\_sp.  
68130224\_Leishmania\_major  
CM4722\_Cyanidioschyzon\_merolae  
118380025\_Tetrahyena\_thermo  
23619270\_Plasmodium\_falcip  
71076452\_Giardia\_lambli  
42523714\_Bdellovibrio\_bacter  
6319395\_Saccharomyces\_cerevi  
66816517\_Dictyostelium\_discoi  
24668543\_Drosophila\_melano  
94721239\_Homo\_sapien  
116061521\_Ostreococcus\_tauri  
30681405\_Arabidopsis\_thalia  
67481173\_Entamoeba\_histol  
57157197\_Trichomonas\_vagina  
48477483\_Picrophilus\_torrid  
84029573\_Thermoplasma\_acidophi  
60681847\_Bacteroides\_fragil  
83815822\_Salinibacter\_ruber  
21673150\_Chlorobium\_tepidu  
111221641\_Frankia\_alni  
28210025\_Clostridium\_tetani  
47570085\_Bacillus\_cereus  
87311784\_Blastopirellula\_marin  
94985204\_Deinococcus\_geothe  
76261183\_Chloroflexus\_aurant

EFSSWGILANWDNIYMTFQPEFIVNQLEMFYNLYEKGVLVYRDLPVYVSWP  
QSVRLGYWMDWDPYFTFSTENNETIWTFLKKCFERKGVYRGHDVMPWSP  
GTRKRLGLWLDLENAYETRQPHYLQYAWRIVKRAHELGLLTYRVLWFCP  
NFRNLGIFMDWENPYFTFNNDYISNSWAVIKKAYERGLLYKGVHVLHWC  
QFKEIGVFMDWENPYVYRDEYIESGWLVKKAWEKGLLYKGVYRVLHWC  
QFKQMGVWMDWQDPYVYDNGYMEESCWWTLLKQADKRDLLTQDKRVIWCP  
QFKSLAVWMDWENPYMTIKAEMYNAAWFAIKRAHERGLLERKMMVNWCH  
QFKMLGIWMDWDPYMTIKNEYIESAWFTLKRAWEKGLLEKDKRVLHWC  
FVNRMGWVDFDQAYKTMNDYMESVLWGFKTLHDKGHVYEGGKIVPYCV  
YVTRQARWVDFKNSYKTMDFMESVLWAFKELYNKGLLYESMRVMPYSW  
YVTRQARWVDFDNDYKTLNVEYMESVLWAFKQLHEKGLTYNGYRVLPCW  
YVTRQARWVDFDNDYKTLNVEYMESVLWAFKQLWDKGLAYESYRVLPCW  
YVTRQARWVDFDNDYKTLNVEYMESVLWAFKSLYDKGLIYQGFVRLPYSW  
VVERLGRWVDFRQGYRMDMTFMESVWNIFKELFSRGLIYRGRVMPFST  
IILRLGRWVDFEKGKYMDFMESVWVWVFNKLNKGLIYESYVRLPYS  
TITRLGRWVDFENDYKTMPEAFMESIWWVMKSLWEKGLLYEGYIILPYP  
TVNRMGWVDFNQTYRMDLPMFESVWVWVFKQYAKGLVYEGKLVMPFSA  
YVTRLGRWVDFDNDYKTMDFMESVWVWVFRSLYDQGLVYEGVQVFPST  
TITRLGRWVDFDNDYRTEPVMESVWVWVFKQWLDKGLVYQDKVIAYST  
TVERVGRWIDFDDYKTMHLTYMESVWVWVFSQLWEKMMVYRGRVMPYST  
IVSRMGWIDFKNGYRMDTSMFESVWVWVFSQLHKKGLVYRGRVMPFST  
IVNRGRWVDFDNDYKTLNVEYMESVWVWVFKQMFDKGLVYRGRVMPYSN  
TVQRIGRWIDFKNDYKTMDFMESVWVWVSELYKNNYIYKSKVMPYSC  
IVKRSGRWIDFKNDYKTMNLLFMSVWVWVFKELYDKGLVYEGTKVMPYST  
TVRRVGRWIDMENPYFTMDVSMQSVWVWVQQLFNKGLIYEGYKVPYSV  
TIGRLGRWIDFNDYKTMPSFMESTWVAFKQLHEKQVYRGRVMPYST  
VNRMGWIDMKNNYKTMDFMESVWVWVQELFKKDLVYQGFVMPYSI  
VTVRGRWIDFKNDYKTLYPWYMESIWWVFKQFLDKGLVYQGVKVPYST  
TVSRLGRWIDFNDYKTLYPQFMESVWVWVFKQYDKGLVYRGRVMPFST  
TVTRIGRWIDFENDYKTMDFMESIWWVFKLHEKNLVYKGFVMPYST  
VITRCGRWIDFKNDYKTMDFMESVWVWVFSQLWEKNLVYRGRVMPYST  
VWVRGGRWIDMDHPYKTMDFMESVWVWVFKQYKELNLYRGLKIMPFSY  
VVRRCGRWIDFVNSYKSMDFMESVWVWVFKQWLDKGLVYEGVQVMPYSY  
VDDLGVFWVDKENSYITLKNDYMESEWALKTLYENLLVKDYKIVPYCP  
VDDLIGFSIDHNGDYITLKNDYMESEWALKTMYSNGLLYKDYTVVYCP  
LTHKMGYVWDMKHPYITVDNRYIETLWLLKQYKGLLYKGYTIQYPS  
LQRMGYVWDLDDPYVTFETDYIETVWLLKQIEEDLLYKGHKIQWYSP  
LTERMGYVWDMDSPIYTCNNYIESVWVWALKLIFDKGLIYKDYKIVPQDP  
MTERMGYVWDLDSAYRMTDTSYIESVWVWVSLKQIFDKGLLVEDFRVTPYCP  
MSEKLAFWWDMENPYVYHNDYIESVWVWALKQLWKNELLYKGHKRVIPYCP  
FTESIGYVWDMDDPYVTFLENPIYESVWHILGTIHEKGLLYKGHKRVIPYCP  
LTERLGFWLKLEAYVYHQSYVESVWVWALKNFYDRGLLYQGHKIVWVWA  
FTQRLGYVWDLSDPYITYENYVESVWVWVLLKRLHAKGLIAQDYKVPVLS  
FTKRIAFWLS-EDAYITYENDYIESTWVIFRQLWDRGLLFRDYKVTMHCP

: :

118193839\_Cenarchaeum\_symbio  
6325217\_Saccharomyces\_mt  
66800699\_Dictyostelium\_mt  
118751535\_Marinomonas\_sp.  
46129096\_Haemophilus\_influe  
75237181\_Escherichia\_coli  
47572014\_Rubrivivax\_gelati  
1174519\_Pseudomonas\_fluorescen  
83594296\_Rhodospirillum\_rubrum  
94968888\_Acidobacteria\_bacter  
15644113\_Thermotoga\_maritima  
15605834\_Aquifex\_aeolic  
116747573\_Syntrophobacter\_fuma  
116057018\_Ostreococcus\_tauri  
CM546\_Cyanidioschyzon\_merolae  
33239720\_Prochlorococcus\_marin  
23227660\_Arabidopsis\_cp  
56751678\_Synechococcus\_elonga  
113477079\_Trichodesmium\_erythr  
67921387\_Crocospaera\_watson  
34763705\_Fusobacterium\_nuclea  
47570310\_Bacillus\_cereus  
46852147\_Homo\_mt  
24665024\_Drosophila\_melano  
149179295\_Planctomyces\_maris  
18312756\_Pyrobaculum\_aeroph  
70606414\_Sulfolobus\_acidoc

SCQASLSHAIEVGYEEDVSDPSLYKVKLLIWTTPPFTLVTDAMVGLHPDE  
ETRTALAEAELEYNEHKSIAAYVKFPLCLIWTTTPWTLNSRAICFNQDF  
SSRTALAEAELEYNNHSTKSIYVAFVVAIWTTPPWTIPANQAICVNSEM  
VGSALAEAEVEYQDKTSLSLDVRYPVVIWTTTPWTLPASQAVSIHPEF  
DCGSSLAEEVEYEDKVSPIYVRFVVAIWTTPPWTMPSNRAIAVNDL  
DCRSALAEAEVEYDYKTSPIVAFQALVIWTTTPWTLPANRAISIAFDP  
DCGSSLAEEFEIYENKSSPTVDVAFLAAVIWTTPWTLPANQALNLP  
DCGSSALAEAEVEYEDKSSSTIDVAFPIIWIWTTTPWTIPANQALNVHPEF  
VEKTALAEAEVEYQDHTSTTIWIRFPVVVIWTTTPWTMPGNRAVAVGPGM  
HDKTALAEAEVEYEMHTSPSVYVRYMMAIWTTPPWTIPANLAVAFSPNA  
RCRTALAEAEIEYHDKSPSIYVKFRSIVIWTTPWTLPANVGIALHPDY  
YDKTAEAEAEVEYEDKPSIYVKFPLAIWTTTPWTLPANLAIMVHPEF  
SCKTALAEAEVEYHDKTSPSIYVKFPMVLIWTTTPWTLPANLAIMVHPEF  
SSMTALAEAEVEYEPHFSQSIYVAFVVAIWTTPPWTIPANAAVAVNAKL  
SSRTALAEAELEYPDHVSRSAVYVAFVVAIWTTPPWTIPANRAVAVNPNL  
SSRTALAEAELEYPEHTSPSIYVAFVVAIWTTPPWTIPANMAVAVNENI  
SSRTALAEAELEYPEHISKSIYAFKLLAVWTTTPWTPANAAVAVNAKL  
SSRTALAEAELEYPDHTRSIVVAMPILAIIWTTTPWTIPANLAVAVNGL  
SSKALAEAELEYPEHKSRSIYAAFKIVAIWTTTPWTIPGNLAVSVNPD  
SSQTALAEAELEYPEHTSRSIYVAFVVAIWTTPPWTIPGNLAVAVNPD  
ATETALAEAEIEYDHVSPSIYVVMQAVLIWTTTPWTLPANVAICLNENF  
TSALAEAEIEYQDKSASIVVAFVVAIWTTPPWTIPANLAVAVNGL  
SSRTALAEAELEYNPHVSRSIYVKFPLILLVWTTQVWTIPANEAVCYMPES  
SSRTALAEAELEVDHISPSVYVRFALAVWTTTPWTLPSNQAICYNASL  
RGSAYSQMEYGRKLSVHKSIVVRFVPLLLIWTTPPWTIPANLAVAVNPEL  
RCETSLSDEHVEYDEREDPSIYVKFRVLIWTTTPWTIPANEAVAVHPDY  
RCETTLADYEVEYRDLLEDPISIYVKFRVLIWTTTPWTLPANVFMINKDF

14600670\_Aeropyrum\_pernix  
84490249\_Methanosphaera\_stadtmanii  
11498241\_Archaeoglobus\_fulgidus  
14521127\_Pyrococcus\_abyssi  
75401346\_Pseudomonas\_fluorescens  
102191610\_Rickettsia\_canadensis  
116670944\_Arthrobacter\_sp.  
15827608\_Mycobacterium\_leprae  
54023744\_Nocardia\_farcinosa  
19074910\_Encephalitozoon\_cuniculi  
51599084\_Borrelia\_garini  
42528163\_Treponema\_denticola  
46446128\_Protoclamydia\_amoeba  
89898154\_Chlamydomonas\_felis  
118749311\_Marinomonas\_sp.  
68130224\_Leishmania\_major  
CM4722\_Cyanidioschyzon\_merolae  
118380025\_Tetrahymena\_thermophila  
23619270\_Plasmodium\_falciparum  
71076452\_Giardia\_lamblia  
42523714\_Bdellovibrio\_bacterium  
6319395\_Saccharomyces\_cerevisiae  
66816517\_Dictyostelium\_discoideum  
24668543\_Drosophila\_melanocephala  
94721239\_Homo\_sapiens  
116061521\_Ostreococcus\_tauri  
30681405\_Arabidopsis\_thaliana  
67481173\_Entamoeba\_histolytica  
51757197\_Trichomonas\_vaginae  
48477483\_Picrophilus\_torridus  
84029573\_Thermoplasma\_acidophilum  
60681847\_Bacteroides\_fragilis  
83815822\_Salinitubus\_ruber  
21673150\_Chlorobium\_tepidum  
111221641\_Frankia\_alni  
28210025\_Clostridium\_tetani  
47570085\_Bacillus\_cereus  
87311784\_Blastopirella\_marina  
94985204\_Deinococcus\_geothermophilus  
76261183\_Chloroflexus\_aurantium

RCETTLADYEVEYRELEDPDSIYVKFPVLLVWTTTPWTLPANAFVMAHPDM  
HCQTALANAIEYEGDKQDPSIYVKFKLVLIWTTTPWTLIPANLAVSIHPDF  
RCETALADAEEVYWEEDPSIYVKFPVIVIWTTTPWTLPANMAVAVHPSL  
RCETALAEHEVEYKLRKDPDSIYVKFPVLLIWTTTPWTLIPANLAVSAHPDY  
RCQTVLSNFEEAFRRPRDMSAYVKFRQFLAWTTTPWTLIPANVALAVAADE  
ACETPLSHFETSRYRERADKAVTVSFMILFAWTTTPWTLIPANLALAVGSDI  
KDETPLSNHELVIYKNRQDQTVTVTFPIALAWTTTPWTLPTNLALAVGPSI  
RDETPLSNHELVIYQSRQDPAVTLGFKVLLVWTTTPWTLPSNLAVAVHPDV  
YEQTPLSNQETAYKMRQDPAVTVDMVLALIWTTTPWTLPSNLAIIVHPDV  
ACSTPLSNFESNYKDVSDPSVLIAPFLLVAWTTTPWTLPSNCLAVNPGF  
KLATPLSNFEVEYKEVNDPSLTIKFKILLAWTTTPWTLPSNLGIAVNGEI  
RCSTVLSNHELGIYKDVHDPATVRFKTLTLLAWTTTPWTLPSNLGLAVGADI  
KLGTPLSNFEEANYKEVDDPSLTVAFQSLAWTTTPWTLVSNLALMVSPI  
ELETVLSNFEEANYKEVQDPAVTVLFLKFAAWTTTPWTLPSNLALVGPDI  
ACTTPLSNFEANYKEVSDLAIVAFQFLAWTTTPWTLPSNLALCVHPEL  
ACSTPLSNFETNYREVQDPAITISFPVFLAWTTTPWTLVSNLALCVHPEL  
GCATVLSNFEEANYKEVDDPSLFIKFKILLAWTTTPWTLPSNLALVINKDF  
KCNTPIISNFELNYKDPDPSIIISFILLVFAWTTTPWTLPSNLALCVNEHF  
ACATPLSNFEANYKEVQDMTCIVSFPVFLVAWTTTPWTLPSNLALCVNPSL  
GISTVLSNFEEANYKVMQDPAITVMFKLIMAWTTTPWTLPSNLALVAGNDI  
GLTTPLSNFEEANYKDVNDPAVTVLGFNVLVAWTTTPWTLPSNLALCVNADF  
GCTTPLSNFEANYKDVSDPACVVSFQITLAWTTTPWTLPSNLALVTPNPKM  
ACTTSLSNFEANYKEVDPVPCVVVALEAFLVWTTTPWTLPSNFACCVHPTM  
ACNTPLSNFESNYKDVQDPSVFTVFPVLLVAWTTTPWTLPSNLAVCVNPEM  
ACNTPLSNFEADYRDVSDPAVTVSFPILVAWTTTPWTLPSNLALCVNPEL  
GCKTPLSNFEANYKEVDPPEIMVTFPVFAWTTTPWTLPSNLALCVNAKF  
GCCTPLSNFEAAYRDVDPATMTFPVFLAWTTTPWTLPSNLALCVNPNM  
CGCTPLSNFEADYRSVSDPAIYIAFKVVIWTTTPWTLPSNLALVVPNPKM  
RCGTSLSNFEVGYKNDVSDPSVFKFAEFIAWTTTPWTLPSNEFLVNPDM  
RCETSLSHEVGYKDVKDPVSVYRFRKSVFAWTTTPWTLPSNEFLVNPDM  
AAGTGLSHELGYRDKVDTTVAQFKMFLAWTTTPWTLPSNTALCVGPKI  
GSHTVLSHEVGYEETQDPSVYIRFPVFLAWTTTPWTLISNTALAVGRI  
KSETVLSHEVGYEETQDPSVYIKFRLLVWTTTPWTLISNTALAVGRDI  
RDETPLSNHEVGYADVDDPSVYRFPVLLVWTTTPWTLVSNLAVAAHPDV  
RCGTALSSHEVGYKDVKEATAFVKFKVILAWTTTPWTLPSNVALAINKFN  
SCGTSLSSHEVGYKTVKDLSATVVKFKVFLGWTTTPWTLIPANLAVHPNM  
QGGTALSAGEVGYREVADPSVYRFPVLLVWTTTPWTLPSNQFAAVHPEL  
RISTTSLRAELSYRMDVDDPSVYRFPVLLVWTTTPWTLPSNLAAVNPD  
RCGTSLSDHEVGYKDVDDPSVYIKFRVLAWTTTPWTLIPANLAVKHA

: : \* \*\* : \* : \*

118193839\_Cenarchaeum\_symbioicum  
6325217\_Saccharomyces\_mt  
66800699\_Dictyostelium\_mt  
118751535\_Marinomonas\_sp.  
46129096\_Haemophilus\_influenzae  
75237181\_Escherichia\_coli  
47572014\_Rubrivivax\_gelati  
1174519\_Pseudomonas\_fluorescens  
83594296\_Rhodospirillum\_rubrum  
94968888\_Acidobacteria\_bacterium  
15644113\_Thermotoga\_maritima  
15605834\_Aquifex\_aeolicus  
116747573\_Syntrophobacter\_fumarum  
116057018\_Ostreococcus\_tauri  
CM546\_Cyanidioschyzon\_merolae  
33239720\_Prochlorococcus\_marinus  
22327660\_Arabidopsis\_cp  
56751678\_Synechococcus\_elongatus  
113477079\_Trichodesmium\_erythrum  
67921387\_Crocospira\_watsonii  
34763705\_Fusobacterium\_nucleatum  
47570310\_Bacillus\_cereus  
46852147\_Homo\_mt  
24665024\_Drosophila\_melanocephala  
149179295\_Planctomyces\_marisnigellus  
18312756\_Pyrobaculum\_aerophilum  
70606414\_Sulfolobus\_acidophilus  
14600670\_Aeropyrum\_pernix  
84490249\_Methanosphaera\_stadtmanii  
11498241\_Archaeoglobus\_fulgidus  
14521127\_Pyrococcus\_abyssi

DYNWIVGATRTAEFIEKSSKGFSEFGLKYVHPLHVAVSEEFVDASTGSGL  
SYSILVETGSIDKLTIKQFQTHLNGLYQNLRLPLHGAHVSTSGTGGL  
DYIFIIISKRELSLVILEFKGQKGLTIKHPQSPITGDHVEIGSTGL  
NYALILAEDMVASVIVGRVGAELAGTVLNHPFIPVILGEHVTTAGTGC  
EYNVILAAELVESVILGSKVADLESLRFRHFPVPIVLDGHTVTDGTTGL  
DYAVILLAKDLVESVILGTVKGALELLRTHFPVPAIIGDHTVLDAGTGA  
EYALLANALVEKCVLATTAGALEGLEFHHPLSPVYLADYATAEDGTGI  
TYALVLAEMVESCVIATATGSALELINFRRHFPSPVYLADYVELGSGTGI  
DYVIAVADLLDDVEIAHVKGADLAGTVCRHPVPLSGLFVTTEQGTGA  
EYVIVAGLEAEATEIARFAGSKLERATFQHPFILGLVADYVMTDGTGA  
EYSWVIATDLLDAFVVEKIKGKDLGKREFVHPISRVLADYVSLTGTGC  
DYVWIVAKELMDKFLVETVKGKDLVGLLEYTHFPFKIYPSFVSLDTGTGL  
TYVWILARGLLESCVLRTEFAGELRGLACSHFSPVIVTGHVTLTEAGTGC  
DYSLVVAEGLREAVTLGTFKQDFENVQYSHFPVPIIGGEYITTEGTGL  
PYSLVVAQDLVETLNKKIVPGSELVGMTRYRHPVLYRVVGGDYITTESGTGL  
DYILIIASDLREIVKVAIVKGMKLDGVLVYKHPPLFVLGGNYITTESGTGI  
QYSVIVATDLPALISKTFLGSDLENCRYTHPIPVVIGGDYITTESGTGL  
TYALIVAALAEVSLVLAATFPVGSVLEHSRVRHPLPVVIGGDYITTESGTGL  
NYAFIVAAEVERLPVATVKGEDLENCYQHPLKIVIGGDYVTTESGTGL  
NYALIVAADLVERLVKATLPGKALEHTIYRHPLEILIGGDYVTTESGTGL  
DYGLILAKDLAESALIKFKGKDLLEYTHYKHPFGLVILGDHVTADAGTGA  
EYSYIIASELFTVVVTVKGSLELEYTVAKHPFSLVMDGHTVTDGTGC  
KYAVYLAADKVASVTISTLSGVDLENGTCSHPLSPLLPANHVMTAKGTGL  
EYVYLMASALMADFIVQHLSEGLLSKLSYNHPILPFDASHVQDSKGTGL  
DYVYVFAKQRLSREILETIKGAQMVGWEYTGPRFRDKGNPHVTVAGEGTGI  
VYAWWLAELVPSLVVETKKGVELAGVRYIHPHQQVTAEPFVLEQGTGL  
EYALVIAKDRVKELILRVYKGEELGLLEYHPLKVLVDGGEAVTLQEGTGL  
EYVILAKARLDHVVLEVLKGSQLEGLRYRHPKLVVMAPEAVTPHEGSGL  
DYSFIVADALIESIILKTLKGETLKGLEYIHPHKKIILGTHVTLLEEGTGC  
EYALILAKELADSVVETYLGEDLEGLLEYHPLHQQVFFADFTVAENT-GC  
DYVWILAKALVDKVVVEFKGRELEGLRYVHILHRVILADFTVLEEGTGL

75401346\_Pseudomonas fluoresce  
102191610\_Rickettsia canad  
116670944\_Arthrobacter sp.  
15827608\_Mycobacterium leprae  
54023744\_Nocardia farcin  
19074910\_Encephalitozoon cunic  
51599084\_Borrelia garini  
42528163\_Treponema dentic  
46446128\_Proteochlamydia amoeba  
89898154\_Chlamydophila felis  
118749311\_Marinomonas sp.  
68130224\_Leishmania major  
CM4722\_Cyanidioschyzon merolae  
118380025\_Tetrahymena thermo  
23619270\_Plasmodium falcip  
71076452\_Giardia lambl  
42523714\_Bdellovibrio bacter  
6319395\_Saccharomyces cerevi  
66816517\_Dictyostelium discoi  
24668543\_Drosophila melano  
94721239\_Homo sapien  
116061521\_Ostreococcus tauri  
30681405\_Arabidopsis thalia  
67481173\_Entamoeba histol  
57157197\_Trichomonas vagina  
48477483\_Picrophilus torrid  
84029573\_Thermoplasma acidophi  
60681847\_Bacteroides fragil  
83815822\_Salinibacter ruber  
21673150\_Chlorobium tepidu  
111221641\_Frankia alni  
28210025\_Clostridium tetani  
47570085\_Bacillus cereus  
87311784\_Blastopirellula marin  
94985204\_Deinococcus geothe  
76261183\_Chloroflexus aurant

NYVLWLAEGCLGGLILERCTGAELAGLRYLPVHVRVTTADVFQMGDGGSI  
DYAYIIAAASVSKYQFTI IKGSELEGLRYKPLFFKIFACDFVVEGDGTGV  
TYAFLLAADLLGAYVTATYTGAEAGLAYQPLWRRFLVADYVTTDDGTGI  
TYVFLVAQARLTAYVLTATYRGADLLGRHYLPPFFQVLPDGFVTTDDGTGI  
RYVYVLAARVSHYVLAEFEGEALVGLSYRPPFHRVLAADYVTTDSGTGV  
LYGYLMHVDRIGEYILQRVSGRELEGLYEYEQPFFRVLASGFVTTDDGTGV  
EYSLILGSKKINSYII EKFKGSQLQGI EYEP IFFKVHTADYITDDGTGI  
DYAYIMAVPRLEAYLIWTKKGALEGLRYEPLFFRVLIGDFVTTDDGTGI  
EYAYILATERLKGIVRKFPGSELEGGHYIPLFFKIILEDSSVVEEGTGI  
TYVWILGQGLERWVLESFPGTALVGKSYEPPFYKILSGSFVEESEGTGV  
PYVWLWLAEAQLESMLDRVLGADLSGKHYEPLFFQVFAADFVTTDSGTGI  
DYVYWLAEARLGEVVVEKVKGAQLVGEKYVPLFFRVISGTYVTTDDGTGI  
IYVWILAEARLGSII IARHHGYELVGLHYEYVFFRVLGGDFVTTADSGTGV  
DYVYILAEARLPELILEKFKGSELVGREYEP LFFRILAGDFVTTADGTGI  
IYLFIFAECRLEWI IVNRFLGSELKELKYKPLFYKI IADDFVSDAGTGI  
AYLYLVAESLVKTLVLRHRLVGLDLAGLRYNPLFWKVVADYVTTDSGTGI  
EYVLIQAALLSSVVLQMMKGTTELVLTYEPLFFRI ISSDHVTTESGTGV  
EYVFI LLESRLKTLIVEKIKGSDLVGLKYEPLFFRVISDDYVTTDSGTGI  
EYIFILGKNRSTILVLETKGTDLIGKKYVPMFFVYVIGDGFVTTDSGTGI  
TYVFLVAESRLSYVVEKFKVGTLDLKHLYKPLFYRVLVDEYVTTDSGTGI  
QYVLI LMEARLSALILERFP GAYLKGKRYRPLFFTVLVDNYVKEEETGV  
KYVLLVAESTRLESII KTVGRALAGLRYEPIFFKVCADSYVTTDSGTGV  
VYVYVAESRSLALVLEKFNGLASLVGKYEPLFFRVVADYVTTDSGTGI  
DYVYVMMCEMLPTLIEKMKGKDLVGTYYVPLFFRVVADYVQNDSTGTGI  
KYAYITMKCRIPSLILEEMDGDVLGIEYEP LFFKIIYADYVTTDSGTGI  
DYSYLLSSKVSLESLIKTFKGRDLEGEIYEQMLMFRVVAASFVTTDSGTGI  
EYSYVVAASRAGYIEIRRMHGRDLVGRYQLMLKVVAGSFVTTSEDGSGI  
DYVVLAKALLNAHVIAEYKGPDLVGMEEYQLIFRVLGDYVTTDDGTGI  
TYVLI LAEALLDDVVEETFSGEELIGQRYEPPYVWYVLDVSTEEGTGV  
DYVLI LAESRSLVLDRCCKGSDLEGRDYEP LFWYVVCDFVSTGEGTGI  
DYAFVVAEPLVAAAVVERFRGTALAGARYTRPFHSSVLAEYVTTDDGTGL  
DYVLI LAKELVDSVI I KEFKGEDILGLQYEQLLFRV IHGDFVTLSDGTGI  
EYVYIVAKERVRDVLVSVHKGEE LLNTSYTAPFYRVI GADVFVTTDSGTGI  
EYSLILATALVEPLTIATCLGAALLGKRYLPPFWRVVAADFVTTDSGTGV  
TYVVI VAAADATRRLVLTSPGRDLEGEYEP PFHFVALADVFVSAADGSGV  
EYVLI VMAAALVGNVLRHFRGNDLVGLRYEPLFYRVIADEIVSLDDGTGI

\*

.

:

\*

118193839\_Cenarchaeum symbio  
6325217\_Saccharomyces mt  
66800699\_Dictyostelium mt  
118751535\_Marinomonas sp.  
46129096\_Haemophilus influe  
75237181\_Escherichia coli  
47572014\_Rubrivivax gelati  
1174519\_Pseudomonas fluorescen  
83594296\_Rhodospirillum rubrum  
94968888\_Acidobacteria bacter  
15644113\_Thermotoga maritima  
15605834\_Aquifex aeolic  
116747573\_Syntrophobacter fuma  
116057018\_Ostreococcus tauri  
CM546\_Cyanidioschyzon merolae  
33239720\_Prochlorococcus marin  
22327660\_Arabidopsis cp  
56751678\_Synechococcus elonga  
113477079\_Trichodesmium erythr  
67921387\_Crocospaera watson  
34763705\_Fusobacterium nuclea  
47570310\_Bacillus cereus  
46852147\_Homo mt  
24665024\_Drosophila melano  
149179295\_Planctomyces maris  
18312756\_Pyrobaculum aeroph  
70606414\_Sulfolobus acidoc  
14600670\_Aeropyrum pernix  
84490249\_Methanosphaera stadtm  
11498241\_Archaeoglobus fulgid  
14521127\_Pyrococcus abyssi  
75401346\_Pseudomonas fluoresce  
102191610\_Rickettsia canad  
116670944\_Arthrobacter sp.  
15827608\_Mycobacterium leprae

VHLSPPANGEDIKIAIFCPIDDEVKFTPDRVIVEDLKLVRIGKLRHKYPL  
VHTAPGHGQDDYILIGIYSPVDHQGRYQLNKI ILCKLSLYKSHEYTHSYYP  
VHTAPGHGVEDFQICVLSVNDLGCFTDDEAVINDLELLHKEDYIHKYYP  
VHTAPDHGVDDFNVGTINLVQDNGVSDADAVLEALNLFVFSKIFHSYPH  
VHTAPDHGLDDFIVGMAGLVSDNGKFI STPLVIEKQLLKKVEIKHSYPH  
VHTAPGHGPDYVIGTANVPVGPDTYLPGDIVIALQLLHVHEKMQHSYPC  
VHSAPYGVDEDFNSCILNVPVQNGVYAAEPLIVQALQMLATAKLEHSYPH  
VHCSPAYGVDDFVICI INPVQSNQVYVPSQPI IEKLRMLQTAAIQHSYMH  
VHMAGPHGEDDYFLCPDPTVDGDGLYMDHPDIVAAMILLAQGS LTHSYPH  
VHTAPAHGADDFYTGQTCNVDEAGRLRNGPVIQLLRLLGFENIEHSYPH  
VHTAPGHGQDDYIYGVISPVDEEGRFTEEEVI IEDLKLVAHSI THSYPH  
VHMAGPHGQEDYVVGYPAPVSDDEGRFVPHLIVGVLKLVEEKIRHSYPH  
VHTAPGHGREDDYDMAYSPVDDNGCFDRAINAKLELILEKSI THSYPH  
VHTAPGHGQDDYISGLYSPVDNAGLFTAELVCI EKLELLKREKYGHKYPY  
VHTAPGHGLEDYNVGFAPVDDVGRFTSDARVLELLRLLLEEKYEHKYPY  
VHTAPGHGVDDFNTGII CPVDEKGFFTSETKI INALKLLKEKPYIHKYPY  
VHTAPGHGQEDYATGLVSPVDEGKFTTEETAVVSYLDLVMEE SYAHKYPY  
VHTAPGHGQDDFIVGVFCPVDDKGDFTAAAVIEWLTLKKEESYAHKYPY  
VHTAPGHGQEDYIVGILSPVDGNGKFTA EIAVIEALQLLKEEYPYEHKYPY  
VHTAPGHGQEDYLVGLSPVDAKGNFTEEV I INELQLLKEEAYQHKYPY  
VHTAPGHGQEDYVAVISPIDHRGYL TEKAI IEYLTILKMQEINHSYPH  
VHTAPGHGQEDFIVGVLCPVDDKGVLTAEKPI TEKLELLKFTI THSYPH  
VHTAPAHGMEDYGVAMDCLVDEGDFVTDVDDVVIKMLQLLKEEKLVSYPY  
VHTAPAHGPEDFLVSVKFCVNEEGTYTKE SLVLDRIAVVHSSKLEHSYPI  
VHTAPCGGDVDHQLGAIAPLGEDGRFE EGELVFERLKLVSVESYPIHYPH  
VHTAPGHGQEDFELAVTNSVE INGIYNELKEVTRDLRLVFEKIRHEYPH  
VHSAPGHGDVDFEIGVVMVNDKGEFTQDEE I ISDLKLLHASKIVHRYPV  
VHSAPGHGTIDYEIAVSVLVDERGFMT EAKAIVEDLRLFHAATIVHRYPV  
VHTAPGHGPEDEYVGPFCPVGEDGCYTSDDRITHELELLNYGTIDHRYGV  
VHTAPGHGVDEYELGVFNVDVDRGVYTEEDDI IDDLYLLAERIVHRYGH  
VHTAPGHGEEDFVGVYSPLDQDGKYTE -PKI IEHLRLVKAGEIEHKYPH  
VHTAPAFGEDDALLGAPNPVRDDGTFS DAPRILADLKLKQEQIEHNYPH  
VHMAGPHGEDDQILCLVCPVDNSGKFTKEDKI I IKLWKLKTEQYIHNYPH  
VHQAPAYGEDDQKVCVLSVDEGAKFLPLKPI TQVLRRLVRQASYEHSYPH  
VHTAPAYGEDDMATAPVTPVDSNGCFDATAQI IRDLKLLRHETYEHPYPH

54023744\_Nocardia\_farcin  
19074910\_Encephalitozoon\_cunic  
51599084\_Borrelia\_garini  
42528163\_Treponema\_dentic  
46446128\_Protochlamydia\_amoeba  
89898154\_Chlamydophila\_felis  
118749311\_Marinomonas\_sp.  
68130224\_Leishmania\_major  
CM4722\_Cyanidioschyzon\_merolae  
118380025\_Tetrahymena\_thermo  
23619270\_Plasmodium\_falcip  
71076452\_Giardia\_lambl  
42523714\_Bdellovibrio\_bacter  
6319395\_Saccharomyces\_cerevi  
66816517\_Dicthyostelium\_discoi  
24668543\_Drosophila\_melano  
94721239\_Homo\_sapient  
116061521\_Ostreococcus\_tauri  
30681405\_Arabidopsis\_thalia  
67481173\_Entamoeba\_histol  
57157197\_Trichomonas\_vagina  
48477483\_Picrophilus\_torrid  
84029573\_Thermoplasma\_acidophi  
60681847\_Bacteroides\_fragil  
83815822\_Salinitracter\_ruber  
21673150\_Chlorobium\_tepidu  
111221641\_Frankia\_alni  
28210025\_Clostridium\_tetani  
47570085\_Bacillus\_cereus  
87311784\_Blastopirellula\_marin  
94985204\_Deinococcus\_geothe  
76261183\_Chloroflexus\_aurant

VHMAPAFGEEDMEVCLVQPLDPGGRFTSMPVI IKDLKLLRHETIEHSYPH  
VHCAPGFGECDYNAFVPCPVDENGRTYSEKAILSDIRVLMNQIRIVHKYYPF  
VHIAP-FGEEDYRVLI IDPLDAECKFTNRKKI IENLKLFKRENYLHYRYPF  
VHTAPGFGEEDNRIFTVCPVDAECKFTHEKQIMERLKLFKKAQILHSYPH  
VQTAPAFGEIDFYACVPCPVDNNGQFTDEKDI IKRLKVIHQGTCHHRYYPF  
VHMAPAFGEADFFVCI VCPVNNHGCFTEEKGI IKSLKVFYHGTVMHRYPF  
VHMAPAFGEEDNRVCSVCPLDSRGRFTHEKAIMQTLKLYRQETITHSYYPF  
VHQAPAFGEDDYQACFVCPVDENGMTSEPEI IKALELFHKASIVHSYYPF  
VHLSAPAFGEDDYRVCLPCPVDDEGKFTTEPRGLIRKMKLVKHETIYTHSYYPF  
VHCAPFGEDDDYKVSPPVPVDENGHFTNVKLI RKNLKLVDSSFKHNYYPF  
VHCAPSYGEDDYRVCLIDPLDWNGYFTNENV IKKKLKLMSNNTIVHSYYPF  
VHIAPFFGEDDYRVGIVCPLDSDGNFLPDKPIL KYLKLVSQSTCTHSYYP  
VHMAPAFGEEDYACMVNPVDDGMFTMEKDI IADLKLKFKQDTIQHSYYPF  
VHNAPAFGEEDNAACLPAIDDLGRFTKDKLI IKYLTLLASQIRHSYYPF  
VHTAPAFGEDDFNVCLILNSVDANGCFSTDKQIS IYLMVNSANLIVHSYYP  
VHNAPYFGEDDYRVCLCPVDEAGRFTNEKQI MAALKLVSSGQVKHSYYPF  
VHQAPYFGAEDYRVCPVCPVDASGCFTEKSI IIRTLKLLVATFTTHSYYPF  
VHQAPAFGEDDYRVCPIDPVDANGCFMFKLLIQEVKLVDNSRIVHSYYPF  
VHCAPAFGEDDYRVCLVAVDDGLFTERKDI IEAVKLVKTSFTHSYYPF  
VHQAPGFGEEDDYRVCLVCPIDFSGKFTA EKDI IERLKI FN VATITHSYYPF  
VHTAPGFGEEDDYGACIVCPIDNCCFTTEAQIMDR LKLIKKETIKHEYPY  
VHAAPAFGADDFEIGILNVPVDQGRFNEKKS IINYLKLFKAEITMFKHYYPF  
VHAAPAFGADDFYQIGILNVPVDKNGRFA DPEDI IVYLKLLKSEKYEHSYYPF  
VHIAPTFGADDAQVAPLQVLNKKGELRPMVSI CMMMKAFKIEKHVNYPH  
VHMAPAFGEEDHAVALFNPIDKDFEFTDAKTI TDDLKLYKHETIYHNYYPH  
VHIAPAFGEEDYELSMQPVARNCGFTA EKPI MQRLKLYRRETIQHTYYPF  
VHQSPAFGAEDLAVCVVNP IGTDRFLADAPL TADLRLWRGLTFTTHSYYPH  
VHTAPAFGEDDNIVCMINLVDEKGFIDC SKI IEYMDLYKSEKFTHSYYPH  
VHIAPAFGEEDYRVVFLHVVDKGEYTEAVDI VRYLALYHKKEKYEHSYPH  
VHQAPAFGEVDYDVLICAVGPDGKFTA EKDI AHHELKFLFLDQYLHYPF  
AHEAPAFGAEDLELALFVDDHGILQVTKGLI ADLKM FHAGTIRHRYYPF  
VHIAPAYG--DLEVTLSVGLDGRVLPEDITRNLKLLRSRVRHYYPF  
.: \* \* \* \* :

118193839\_Cenarchaeum\_symbio  
6325217\_Saccharomyces\_mt  
66800699\_Dicthyostelium\_mt  
118751535\_Marinomonas\_sp.  
46129096\_Haemophilus\_influe  
75237181\_Escherichia\_coli  
47572014\_Rubrivivax\_gelati  
1174519\_Pseudomonas\_fluorescen  
83594296\_Rhodospirillum\_rubrum  
94968888\_Acidobacteria\_bacter  
15644113\_Thermotoga\_maritima  
15605834\_Aquifex\_aeolic  
116747573\_Syntrophobacter\_fuma  
116057018\_Ostreococcus\_tauri  
CM546\_Cyanidioschyzon\_merolae  
33239720\_Prochlorococcus\_marin  
22327660\_Arabidopsis\_cp  
56751678\_Synechococcus\_elonga  
113477079\_Trichodesmium\_erythr  
67921387\_Crocospaera\_watson  
34763705\_Fusobacterium\_nuclea  
47570310\_Bacillus\_cereus  
46852147\_Homo\_mt  
24665024\_Drosophila\_melano  
149179295\_Planctomyces\_maris  
18312756\_Pyrobaculum\_aeroph  
70606414\_Sulfolobus\_acidoc  
14600670\_Aeropyrum\_pernix  
84490249\_Methanosphaera\_stadtm  
11498241\_Archaeoglobus\_fulgid  
14521127\_Pyrococcus\_abyssi  
75401346\_Pseudomonas\_fluoresce  
102191610\_Rickettsia\_canada  
116670944\_Arthrobacter\_sp.  
15827608\_Mycobacterium\_leprae  
54023744\_Nocardia\_farcin  
19074910\_Encephalitozoon\_cunic  
51599084\_Borrelia\_garini  
42528163\_Treponema\_dentic

CWRSHHRIVWLARRGWFKYKLGGLGSEVVDAAESVEYFFPRNRFGLIVKEKH  
DWRSKKPVIIRATPQWFADLHVKNLALLESISR VKFCPGYSRLSSFMKSRN  
DWRTKKPIIRTTLQWVFLGKIQKTALQS IERVNMVPGSNRLSSMIGKRT  
CWRTKTPIIFRATPQWFISMTLLDSAKH AVEGVKWPVPGQNRMEGMLNNSP  
CWRHKPTPIIFRATPQWF IGMELRQALGEIKQVRWIPGQARIEKMVENRP  
CWRHKPTPIIFRATPQWFVSMDLRAQSLKEIKG VQWIPGQARIESMVANRP  
CWRHKPTPIYRAAAQWVFRMDLRQTALAAIDATAFY PGRARLRDMIANRP  
CWRHKPTPIYRATAQWF IGMDLRVRSLKAI EDTKFVPGQARLHSMIANRP  
SWRSKAPLIFRNTPQWF ISMELRDKALAAIDETR WVPGRNRI RAMIESRP  
CWRCHNPIIFRATEQWF IAMELRSVALDEIKKVKWDPGEERISNMIATRP  
CWRCKGPTPIIFRATEQWFISVDLRQKVL EEIDKVKWIPGRNRI SMVSEERP  
CWRCKNPVIFRATPQWF IGMDLRQAL EIEKVKWIPGKNRI KSMVENRP  
CWRCKNPVIFRATEQWF ISMELRGRALQWIDRVDWIPGRDR IHNMIANRP  
DWRTKKPTIFRATEQWFASVEFREDALKELDKLQFIPGSKRMRPMSGRA  
DWRTKKPTIVRATEQWFASVFRD KALEALQVSVQWVPGENRIRGMTESRD  
DWRTKKPTIFRATEQWFASVEFRNDALN SIEKVEWLP GK KRI KSMVEDRG  
DWRTKKPTIFRATEQWFASVEFR TATMDA INNVKWPVAVNRI SAMTSSRS  
DWRTKKPTIFRATEQWFASVEFR EQALQAI AEVDWIPGENRITSMVSEERS  
DWRTKKPTIFRATEQWFASVEFRSEALKAI AEVNWIPGENRITPMVNDRS  
DWRTKKPTIFRATEQWFASVEFRDAALTAIKT VNWVPGENRITSMVGDRS  
DWRSKTPVIFRATEQWF IRMELREKTLKAI DKNIFIPGKNRI GSMMETRP  
DWRTKKPTPIIFRATAQWFASIEFRKELLEAVAE TKWVPGETRLHNMDRDRG  
DWRTKKPVVIRASKQWF INITIKTA AKEL LKVKVFI PALNGMVEEMDRRP  
DWRTKKPVIRASEQWF INTELKTPAADAL EIQVEIYPSKALLTQLQKRP  
CWRTGDELIFRLVDEWF INMDWREEIKDVTRQIDWVPGEQHELEWLTNMR  
CWRCSGLILRADRQWF IAISIRDKMYAE LQKVNVPVPRD-RFDIFVQNR  
CWRCKTPIILRAIEQWF IAVSLKDHLMGEIDRVRWIPGKTRIGNMVKEVR  
CWRCKTPIILLRATQWFVAVTLKNQLMREAEK VEWQAKTRFMNMLRELRL  
CWRCKTPIIYIATKQWF IKVTIKDQMLEQVDSVEWVPGESRFRNWNENAR  
CWRCKTPIIYRATEQWF IKISLKD EMLLEEIDKVMWIPGSARFKDWVSNAK  
CWRCKTPIIFRATDQWFLKISVKDKI IKENDKVTWYPKI-RFDNGVRDSG  
CWRCDNPIIYRAVESWF IRASLREQLVENNSQVNWVPKEGRFGDWIRNAR  
CWRTDPTPIYKAVPSWYVKVTFKDRIVELNQQINWIPKDNVFGKWLENAR  
CWRCRNPIIYRAVSSWYVEVTFKDRMSELNQE INWIPKDGQFGKWLENAR  
CWRCRNPIIYRAVSSWYVAVTFRDRMV ELNQQITWYPKDGQFGKWLGAR  
SWRSQDPTIYMAVPSWYVAVTFRDRMV ELNQQITWYPRDQGFQKWLEGAR  
CWRSDPTLLYKLVNWFVVKVHVD SLLRNNEK INWVPKYKRFHNWLENAR  
CYRTNYP IYRPISSWVFNVEIKTQLLEVN EKNWMPKGRFGKWLENAR  
CWRCSPLIYRAVASWVSVTIKDKLLNANSK INWQPKTRFGKWLEGAR

46446128\_Protochlamydia\_amoeba  
89898154\_Chlamydomydia\_felis  
118749311\_Marinomonas\_sp.  
68130224\_Leishmania\_major  
CM4722\_Cyanidioschyzon\_merolae  
118380025\_Tetrahymena\_thermo  
23619270\_Plasmodium\_falcip  
71076452\_Giardia\_lambli  
42523714\_Bdellovibrio\_bacter  
6319395\_Saccharomyces\_cerevi  
66816517\_Dictyostelium\_discoi  
24668543\_Drosophila\_melano  
94721239\_Homo\_sapien  
116061521\_Ostreococcus\_tauri  
30681405\_Arabidopsis\_thalia  
67481173\_Entamoeba\_histol  
57157197\_Trichomonas\_vagina  
48477483\_Piccharophilus\_torrid  
84029573\_Thermoplasma\_acidophi  
60681847\_Bacteroides\_fragil  
83815822\_Salinibacter\_ruber  
21673150\_Chlorobium\_tepidu  
111221641\_Frankia\_alni  
28210025\_Clostridium\_tetani  
47570085\_Bacillus\_cereus  
87311784\_Blastopirellula\_marin  
94985204\_Deinococcus\_geothe  
76261183\_Chloroflexus\_aurant

CPRSDTPLIYKTVRTWVFAVEIKDRLLAANSQIHWTPQYGRFGKWLEGAR  
CWRDTPLIYKTVNSWFI SVEIKDKMLRANRKIHWPVKDGRFGKWLDGAR  
CPRSDTPIIYRSVPSWYIKVEMRAELQANNEQINWVPPQGRMGKWLGEAI  
CWRSDTPLIYKAVESWVFNVEFRDRLIECNDKTYWVPKTRRFSNWLAEAR  
CWRSDTPLIYRAVPSWFI AVEFRDRLDLCNARTYWVPREHRFANWLENTR  
CWRSDTPLIYKAVHCWF IKVTLKDDLLANNKAYWVPEGRFNWLNQNS  
CWRSDTPLIYRAIPAWFVVRVSTNKLVENNETTYWIPKEKRFHNWIKDAK  
CWRSDTPLIYRAIPSWFVRVEIKDSLIRNNLKASWVPQEKRFHNWLENAR  
CYRSDTPLIYRAVSSWVFAVEIKEELIANNKQTSWVPRDGRFGNWLEGAR  
CWRSDTPLLRSVPAWFVVRVIVPQMLDSVMKSHWVPKEKRFANWIANAR  
CWRSDTPLIYKAVGWSWVVRVEIRDKLLANNNDKYWVPEKRFANWLNKAT  
CWRSDTPLIYKAVPSWVVRVEMSKNLLDCSSQTYWVPEKRFGNWLKEAR  
CWRSDTPLIYKAVPSWVVRVEMVDQLLRNNDLCYWVPREKRFGNWLNKAR  
CWRSDTPLIYRAIASFFVVKVEVKERLVANNLETRWVPEKRFHNWLESAH  
CWRSDTPLIYRAVPSWVVRVRELKELKLSNEQTEWVVKDGRFHNWLENAR  
CWRSDTPLIYRAIPSWVFNVEFKDKLVESSQTYWVPREGRFNWLNAR  
CWRSGTPLIYRIPSWVFRVIEHRELLIENTNTHWVPRDGRFIEWLNKAR  
CYRCDTPLLYYPLDWF IKVSI RKKLLENNEKINWVPKNGRFGNFLEAK  
CYRCDTPLLYYPLDAWFI AVSIRDKLVYNERINWPKHGRFGNFLEAK  
CWRDTPVLYYPLDSWFI RSTCKERMIELNKTINWPKGTGRFGKWLENLN  
DWRKGTPLMSYPVESWFI ETTLKDRMVELNDTINWQPGEGRFGWLENNV  
SWRYDVPVIYYARES WYIRTTIAPRMVALNKTI NNWVPGTGRFGNFLEAK  
CWRCHTPLIYPLPSWYIRTTI RQLLAONEATDWHPKTGRYGEWLRGNV  
CWRCDTALLYPTDSWVVRMTRDKLLENNNKVNWVYPRTGRFGKFLNVI  
CWRCDSPLLYYAGESWLI RTTIKDTFLQNNDTVTWYPKHGRFGKFLNVM  
CWRADSLIQYPRKSWFLRTTFKDEMANNQINWLPDRDGRFGNFLESNV  
HDRTGDPILYFAKKGWYIRTNVADRMLTNEEINWVPKHGRFGHWLEGNV  
CWRCDTPLLYYAKRSWYIRTTFKADLVANNQIHWVPRDGRFGNWLENNI

\* : :

118193839\_Cenarchaeum\_symbio  
6325217\_Saccharomyces\_mt  
66800699\_Dictyostelium\_mt  
118751535\_Marinomonas\_sp.  
46129096\_Haemophilus\_influe  
75237181\_Escherichia\_coli  
47572014\_Rubrivivax\_gelati  
1174519\_Pseudomonas\_fluorescen  
83594296\_Rhodospirillum\_rubrum  
94968888\_Acidobacteria\_bacter  
15644113\_Thermotoga\_maritima  
15605834\_Aquifex\_aeolic  
116747573\_Syntrophobacter\_fuma  
116057018\_Ostreococcus\_tauri  
CM546\_Cyanidioschyzon\_merolae  
33239720\_Prochlorococcus\_marin  
22327660\_Arabidopsis\_cp  
56751678\_Synechococcus\_elonga  
113477079\_Trichodesmium\_erythr  
67921387\_Crocospaera\_watson  
34763705\_Fusobacterium\_nuclea  
47570310\_Bacillus\_cereus  
46852147\_Homo\_mt  
24665024\_Drosophila\_melano  
149179295\_Planctomyces\_maris  
18312756\_Pyrobaculum\_aeroph  
70606414\_Sulfolobus\_acidoc  
14600670\_Aeropyrum\_pernix  
84490249\_Methanosphaera\_stadt  
11498241\_Archaeoglobus\_fulgid  
14521127\_Pyrococcus\_abyssi  
75401346\_Pseudomonas\_fluoresce  
102191610\_Rickettsia\_canade  
116670944\_Arthrobacter\_sp.  
15827608\_Mycobacterium\_leprae  
54023744\_Nocardia\_farcin  
19074910\_Encephalitozoon\_cunic  
51599084\_Borrelia\_garini  
42528163\_Treponema\_dentic  
46446128\_Protochlamydia\_amoeba  
89898154\_Chlamydomydia\_felis  
118749311\_Marinomonas\_sp.  
68130224\_Leishmania\_major

PWCISRERFWGCPPLVWNNWLYSRQIEIHLRPWIDEVVIKTKREQVFLDT  
EWCISRQRWSWGIPLSFYIEILAHAI EKNAWFDNDMKEWLPYCRSQDTMDV  
DWCISRQRVWGCP I PVLYESINHIELDCWFEMSTQQLLPVKGDTMDV  
DWCVSRQRVWGVP I ALFIRLIEEVAKRDWAFEMAEELLGYSKVTDTLDV  
DWCISRQRVWGVPMTL FVELLEEVAKRQAWWDLDEKELLYGRKVPDTLDV  
DWCISRQRVWGVPMSL FVELMEEVAKRQAWWDLDAKEILGYKVPDTLDV  
DWCISRQRVWGVP L PFFLALMDRAAALEAWSRLDPREWLGKRGSTLDLDV  
DWCISRQRNWGVP I PFFLELMEVVAQREAWFKLDAEELLGYDKISDTLDV  
DWCVSRQRWSWGP I AIFVAVTERIAQADAWFTGDPFRFLGFEPVRDIVEV  
DWCISRQRVWGVP I AVFVAVNAGVVERD TWYKHQASELLPFRKEMDI DV  
DWCISRQRVWGVP I PAVKVI EHFMIKINAWFEKEVEELIPFEKMDI LDV  
DWCISRQRVWGVP I TVFYEYFVAQLD VWFELTSSQLLPFTKEEDILDV  
DWCISRQRVWGVP I CVTELF EKTAALDCWFEMTSEELLPFEKEDILDV  
DWCISRQRVWGVP I PAFYAI IKHVT E INAWWELEVEDLLPYVRGDTMDV  
DWCISRQRVWGVP I PVFYE I IQVSE I DAWWTLPIEQLLPLRKGDTMDV  
DWCISRQRNWGVP I PVFYATIKHIYNLDAW WELPISELLPWEKGDMDV  
DWCISRQRVWGVP I PAFYETINHVKS I DAWWYMSVEDLLPYEKGDTMDV  
DWCISRQRVWGVP I PVFYETIAHVRA I DAWWELDVADLLPYRKGDTMDV  
DWCISRQRVWGVP I PVFYETIAHVQK I DAWWEMSEELLPYRKGDTMDV  
DWCISRQRVWGVP I PVFYETIKYIQK I DAWWEMSEELLPYRKGDTMDV  
DWCISRQRVWGVP I PIFYEILDRICDLNIWVKSPEELIGLRKETIMDV  
DWCISRQRVWGVP I PVFYETINHVADLNWVWFREAKDLLPFRKEDIMDV  
YWCISRQRVWGVP I PVFHTTEHIVKLDI WTLPEQLLPYVPGQDILD I  
YWCISRQRVWGVP I PVLYALIEHL CNLDFWVKSVEELVPLVKGDTILD I  
DWMVSKRFRWGLALPIWVEVIGSLAELTPHRPWIDAVLKKMSRIPDVGNP  
DWNISRNRVWGTPLPVWRLVIGSLEELLVHRPWIDQVKISWREPVMDV  
DWVISRQRVWGTPLP I WIVVGGVDEL DLRPWIDSVVRRRISDVADV  
DWVISRQRVWGTPLP I WVRHVGSVEELNLRPWVDRVELKMRVDPVLDV  
DWTISRQRVWGTPLP I WTVVIGSKEELFVHRPHVDNITIPHRVDPVLDV  
DWCISRQRVWGTPLP I VWIKVGSINEIDLHRPKIDAVTF SMRRVDPVFDV  
DWVISRQRVWGTPLP I WQVVGSWRELDLRPVYDAF I IKMRVKDQVVDV  
DWAVSRNRVWGTPLP I WREVMSIAQIDLHVPHIDEHRFAMSRVTVGFDC  
DWSISRNRVWGTPLP I VWKDVYGSIEELDLHRPFI DELTRAMRIEDVDFC  
DWSISRNRVWGSP I PVWQDVYGS LAEIDLHRPFI DELVRPVRVDPVLDV  
DWSISRNRVWGTP I PVWQDVYGS LDELNLRPFI DELTRPVRVDPVFDV  
DWNISRNRVWGSP I PVWQDVYGS LEELDLHRPAIDQLTRPVRVDPVLDV  
DWSISRNRVWGTP I PLWVICIGSVGELDIHREFIDGIVI -YRRVEVLDV  
DWAISRNRVWGTP I PIWICVGSRKELDLHKDKIDKITWPFIRTSEVLDV  
DWAISRNRVWGTP I PIWKICVGSREELDMHKHFVDKISIPMRVSEVLDV  
DWAISRNRVWGTP I PLWRHVGSIEELDLHRHFIDEMSF -FKRIVEVDFC  
DWAISRNRVWGTP I PIWKLVIGSIEELDLHCFIDQLKV -FORVYVDFC  
DWSISRNRVWGTPLP I WVLCLGSIEELDLHRHDVDELTFYSRIAEVDFC  
DWNISRNRVWGTPMPVWVHCVSNAKQLDIHRQFVDNITIPLRKVPVDFC

CM4722\_Cyanidioschyzon\_merolae  
118380025\_Tetrahymena\_thermo  
23619270\_Plasmodium\_falcip  
71076452\_Giardia\_lambli  
42523714\_Bdellovibrio\_bacter  
6319395\_Saccharomyces\_cerevi  
66816517\_Dictyostelium\_discoi  
24668543\_Drosophila\_melano  
94721239\_Homo\_sapien  
116061521\_Ostreococcus\_tauri  
30681405\_Arabidopsis\_thalia  
67481173\_Entamoeba\_histol  
57157197\_Trichomonas\_vagina  
48477483\_Picrophilus\_torrid  
84029573\_Thermoplasma\_acidophi  
60681847\_Bacteroides\_fragil  
83815822\_Salinibacter\_ruber  
21673150\_Chlorobium\_tepidu  
111221641\_Frankia\_alni  
28210025\_Clostridium\_tetani  
47570085\_Bacillus\_cereus  
87311784\_Blastopirellula\_marin  
94985204\_Deinococcus\_geothe  
76261183\_Chloroflexus\_aurant

DWNVSRNRYWGTPLPVVTVVGSIAELDLHRHNIDSIEIRLRRVEEVFDC  
DWCFSRSRFGWNPPIPIWVVCIGSVEELDLHKDFIDHLTIPLRRIDEVDFDC  
DWCISRNRYWGTPIPIWCICVESIKHLDLHRHYIDNIEIKLRPFVDFDC  
DWSISRNRFGWCPPIPIWMKVIGSISELDIHRDYLDNMTIPMRRISPVFDC  
DWAISRNRFGWGTPLPIWRMCI GSRAELDLHIEFVDKITIPLRKVDGVLDC  
DWNVSRNRYWGTPIPLVWVVCVGSIKELDLHRDVIDKLTIPLRKRIEEVDFDC  
DWAISRNRRYWGTPIPLWVIVVIGSIDELDLHRESIDHITIPLRRIEDVDFDC  
DWAISRNRRYWGTPIPIWRVIVIGSIKQLDLHRESIDHIEIPLRRIAPVDFDC  
DWTISRNRRYWGTPIPLVWVVCIGSVAELDLHRESVDHLTIPLHRISEVDFDC  
DWAISRNRRYWGTPIPVVSLVVGSI AELDLHRHFIDDLLEIPLRRVEDVDFDC  
DWAISRNRFGWGTPLPIWIVIMDSVEKLDLHRHHIDHITIPLRVEDVDFDC  
DWAISRNRFGWGTPIPIWTVCVGSVKELDLHRESVDNLI IELHRISEVDFDC  
DWAISRNRRYWGTPIPIWTYCIGSIKELDIHCHFI DQTFKLRHRIPEVDFDC  
DWAISRDRYWGTPLPIWRLAIGSRDDL LHRPYIDDVVLKMHRESYVIDT  
DWNLSRDRFWGTPLPAWRVFGVSRKEIDLHRPYIDEVRFKMSREPYIDT  
DWNLSRDRYWGTPLPIWRKCI ESVEELDLHRPYVDDI ILLVMKREADLIDV  
DWAISRDRYWGTPLPVVVEVIGSVEELDLHRPFVDEL TWEMRRVPDLIDV  
DWAISRNRRYWGTPLPVVWVFAVGSVAELDLHKEPFVDRI -WFFNRTPELIDV  
DWAISRNRRYWGTPLPIWRVVCVGSIAELDPHRPFVDEVTISAHRVPEVIDV  
DWGISRDRYWGTPLPIWEECIGSISELELHKPYIDKVKLKMRTREV IDC  
DWNISRNRRYWGTPLNVWEFAPKSIADLELHKPYVDEVQVCMNRTPEVIDV  
DWAISRNRRYWGTPLPIWVEAVCSYAELEKIHKPYIDAITYDMQRVTEVIDC  
DWAISRERYWGTPLPFWMQVVGSAELDLHRPSIDDVFTYRRVPEVLDV  
DWAISRERYWGTPIPIWTVCI GSLAELDLHRPYIDEVWEMRRIPDVADC  
\* .\*: \* \*\* .: :

118193839\_Cenarchaeum\_symbio  
6325217\_Saccharomyces\_mt  
66800699\_Dictyostelium\_mt  
118751535\_Marinomonas\_sp.  
46129096\_Haemophilus\_influe  
75237181\_Escherichia\_coli  
47572014\_Rubrivivax\_gelati  
1174519\_Pseudomonas\_fluorescen  
83594296\_Rhodospirillum\_rubrum  
94968888\_Acidobacteria\_bacter  
15644113\_Thermotoga\_maritima  
15605834\_Aquifex\_aeolic  
116747573\_Syntrophobacter\_fuma  
116057018\_Ostreococcus\_tauri  
CM546\_Cyanidioschyzon\_merolae  
33239720\_Prochlorococcus\_marin  
22327660\_Arabidopsis\_cp  
56751678\_Synechococcus\_elonga  
113477079\_Trichodesmium\_erythr  
67921387\_Crocospaera\_watson  
34763705\_Fusobacterium\_nuclea  
47570310\_Bacillus\_cereus  
46852147\_Homo\_mt  
24665024\_Drosophila\_melano  
149179295\_Planctomyces\_maris  
18312756\_Pyrobaculum\_aeroph  
70606414\_Sulfolobus\_acidoc  
14600670\_Aeropyrum\_pernix  
84490249\_Methanospaera\_stadt  
11498241\_Archaeoglobus\_fulgid  
14521127\_Pyrococcus\_abyssi  
75401346\_Pseudomonas\_fluoresce  
102191610\_Rickettsia\_canade  
116670944\_Arthrobacter\_sp.  
15827608\_Mycobacterium\_leprae  
54023744\_Nocardia\_farcin  
19074910\_Encephalitozoon\_cunic  
51599084\_Borehalia\_garini  
42528163\_Treponema\_dentic  
46446128\_Protochlamydia\_amoeba  
89898154\_Chlamydomydia\_felis  
118749311\_Marinomonas\_sp.  
68130224\_Leishmania\_major  
CM4722\_Cyanidioschyzon\_merolae  
118380025\_Tetrahymena\_thermo  
23619270\_Plasmodium\_falcip  
71076452\_Giardia\_lambli

WHNSGSAFFSSLI PAPPFFTEGIDQTRGWAYTLLVENVIMSGSSPYKSLF  
WFDGSSWSVILKPLSPLYLEGS DQHRGWFOSSLLTKVASSNVPYEEVIT  
WFDSGTSWRGVLRADILYLEGS DQHRGWFOSSLLTSVVCVRDIEPYKNVVT  
WFDSGVTHYSVIFPADLYLEGS DQHRGWFOSSLKTSIAIRGVPPYKQVLT  
WFDSGSTYSSVVQNDIMYLEGS DQHRGWFMSSMLMSTATDSKAPYKQVLT  
WFDSGSTHSSVVHAADMYLEGS DQHRGWFMSSMLMSTAMKGRAPYRQVLT  
WFDSGSTFFHVLPEADLYLEGH DQHRGWFHSSLLIACAI EGRAPYRGLLT  
WFDSGTTHWHVLRADLYLEGS DQHRGWFHSSLLTGCAIDNHAPYRELLT  
WFDSGSTHAFVLPADLYLEGS DQHRGWFHSTLLESCTGRAPYDAVLT  
WFESGSSKLAVI--ADFYTEGG DQHRGWFHSSLLCHIGA QGHAPYKHVLT  
WIDSGASFYEITFFPLDMYLEGS DQHRGWFHSSIFLAVAKRGSAPYKQVLT  
WFDSGCSHAAVIQKADLYLEGS DQHRGWFOASLLESVGSYLEAPYKAVLT  
WFDSGVSHAAVLSPADLYLEGS DQHRGWFHSSLLTAVGTRNAPYKSVLT  
WFDGSSWAGVVPADVYLEGS DQHRGWFOSSLLTGVMGAMQAPYKILT  
WFDGSSWASLVVADLYLEGS DQHRGWFOSSLLTSVAVRGSAPYKAVLT  
WFDGSSWTSV IYPADLYLEGS DQHRGWFOSSLLTSVAVNSHAPYKVLVLT  
WFDGSSWAGVLPADVYLEG TDQHRGWFOSSLLTSIATQKAPYSAVIT  
WFDGSSWAAVAYPADLYLEGS DQHRGWFOSSLLTSVACNGHAPYRRVLT  
WFDGSSWAAVAYPVDIYLEGS DQHRGWFOSSLLTSIATNGHAPYKQVLT  
WFDGSSWASVAYPVDIYLEGS DQHRGWFOSSLLTSVAVNGIAPYKTVLT  
WFDGSSSHRGLRPADLYLEGS DQHRGWFOSSLLTSVASTGSPYKSVLT  
WFDGSSSHQAVLRPADLYLEGS DQYRGWFNSLSTAVAVTGKAPYKGVLS  
WFDGTSWASYVLQRADLYLEG DQLGWFOSSLLTSVAARKGAPYKTVIV  
WFDGSGTWSAVL--ADLYLEGY DQFTGWFOSSLLMSIAARECAPYKALFV  
WLDAGIVPFSMTYPADLVTECF GQFRNWFYALLSMATMMDGTPPFKTL LG  
WLDSGIAWIAAVFPYDFVTEGID QTRGWFYSLTASVLYTGRAPYKAVLV  
WFDGSAFFASLGPVLDVLEGH DQLRGWFFSLLRGTGILMDKAPYEAFLV  
WFDSGIAFYASLKPVD FIVEGH DQIRGWFFSLLRSGVIGFGETPYRRVLV  
WIDSGVAGWAALFPYDF ITEGH DQTRGWFYSQLGLGVAAFGKAPYKAVLM  
WFDGSGVASWGSWLPAD FITEGH DQTRGWFYSQLGTSVVCFDKAPYKAVLM  
WFDGSIASWASLWPA D FIVEGEDQVTKWFYSSQQAASIVAFDTPYRRVAM  
WFESGAMPFASRFPAD FIVEYLAQTRGWFYTLMMVISTGCFEQNPFKNAMC  
WFESGSMPSQAFFPAD FIVEYVAQTRGWFYTLMLVSTALFDRPPFLNCIC  
WFDGSMPSYQVNPAD FIVEYIGQTRGWFYMLHILSTALFDRPAFRNVIS  
WFDGSMPSYAQVYPGDF IVEYIGQARGWFYTLHVLATALFDRPAFKTCIA  
WFESGSMPSYAQVFP GDFIVEYNGQTRGWFYTLHVLATALFDSPAFKTVAA  
WFESGSMPSYAQDFPAHF IEGELDQTRGWFYTLHVISLLFGQAFNLVVV  
WFESGAMPYANFPAD FIAEGLDQTRGWFYTLILGTSLFENAPFNKVVIV  
WFESGSMPSYAQFPAD FISEGLDQTRGWFYTLTILAAALFDEPAFKNCIV  
WFESGSMPSYAQNFPAD FIAEGLDQTRGWFYTLTVLSAALFDQPAFNKVVIV  
WFESGAMPYAQVFPAAF IAEGV DQTRGWFYTLQVLSQCLFGRPAFNKVVIV  
WFESGSMPSYAQFPAD FVSEGLDQTRGWFYTLVLVGFALFDVSPFRNVAV  
WFESGAMPYASVFPAQF IAEGLDQTRGWFYTLMLVGTALFNEPFPKNVIV  
WFESGSMPSYQGFPA D FIEGEGIDQTRGWFYTLNVISTALRNSGPNKLVIV  
WFESGSMPSYAKVFPAD FIAEGLDQTRGWFYTLVISTLLFNKAPFNKLVIC  
WFESGSMPSYAQFP GDF IAEGLDQTRGWFYTLILSTALFDSPPSMNCIV





94721239\_Homo\_sapien  
116061521\_Ostreococcus\_tauri  
30681405\_Arabidopsis\_thalia  
67481173\_Entamoeba\_histol  
57157197\_Trichomonas\_vagina  
48477483\_Picrophilus\_torrid  
84029573\_Thermoplasma\_acidophi  
60681847\_Bacteroides\_fragil  
83815822\_Salinibacter\_ruber  
21673150\_Chlorobium\_tepidu  
111221641\_Frankia\_alni  
28210025\_Clostridium\_tetani  
47570085\_Bacillus\_cereus  
87311784\_Blastopirellula\_marin  
94985204\_Deinococcus\_geothe  
76261183\_Chloroflexus\_aurant

NGLVLASDGQKMSKRKKNYPDPVSI IQYKYGADALRLYLINSVAENLRFK  
NGLVLAADGKKMSKSLKNYPDPNTILDKYKYGADALRLYLIDSPVAEPLRFK  
NGLVLAEDGKKMAKLRNYPPELEVIDEYKADAVRLYLINSVAEPLRFK  
NGLVLASDGKKMSKRLKNYPDPMDMINLYGADALRLSLINSVAEPTVKFQ  
NGLIMAADGKKMSKKEKNYTDPELIMDRFGADAVRLYLINSVAADPFVFK  
ISHILDENGQKMSKSGNFIAAIDFLNDYKADAAARMFFFTGAPWNSKSVN  
INFILDAQGRKMSKSGNSVYALDFLNEVPPDSLRLFFLYGAPWKSNDL  
NGLVLDKNGKMSKRLGNAVDPFSTIEQYGSPLRWYMITNSWDNLKFD  
NGLVLEDEGNKMSKSVGNTVEPFVDDYKADAVRWFMMNSNAPWESIRFS  
NGHILDKSGQKMSKSGNVVDPFESMEQYKADAIRWYLMITSPWRPKLFN  
LGLLLDAEGRKMSKHVGNVLDPFELFERHGADAVRWMLAGGSWADRVRG  
LGHVLDKHLKMSKSGNVVDPFDVLDKADASRWHFYTASAWLPTRFS  
LGHVLEDEGQKMSKSGNALDPVDLVEKFGADALRWALLVDSAWNARFNS  
LGLMLDEHGQKMSKSKRNYREPNEIFDKYKYGADALRWYLFANQPWTSIRYN  
LGHIVLDEGKMSKSGNVVPELPLFDYKADSVRWYMFMAAGDQKRFNS  
LGHILDENGLKMSKSGNVIEPEEVINAYGVDALRWYLFATAAGNARRFS  
\* : \* . : \*

118193839\_Cenarchaeum\_symbio  
6325217\_Saccharomyces\_mt  
66800699\_Dictyostelium\_mt  
118751535\_Marinomonas\_sp.  
46129096\_Haemophilus\_influe  
75237181\_Escherichia\_coli  
47572014\_Rubrivivax\_gelati  
1174519\_Pseudomonas\_fluorescen  
83594296\_Rhodospirillum\_rubrum  
94968888\_Acidobacteria\_bacter  
15644113\_Thermotoga\_maritima  
15605834\_Aquifex\_aeolic  
116747573\_Syntrophobacter\_fuma  
116057018\_Ostreococcus\_tauri  
CM546\_Cyanidioschyzon\_merolae  
33239720\_Prochlorococcus\_marin  
22327660\_Arabidopsis\_cp  
56751678\_Synechococcus\_elonga  
113477079\_Trichodesmium\_erythr  
67921387\_Crocospaera\_watson  
34763705\_Fusobacterium\_nuclea  
47570310\_Bacillus\_cereus  
46852147\_Homo\_mt  
24665024\_Drosophila\_melano  
149179295\_Planctomyces\_maris  
18312756\_Pyrobaculum\_aeroph  
70606414\_Sulfobolus\_acidoc  
14600670\_Aeropyrum\_pernix  
84490249\_Methanosphaera\_stadtM  
11498241\_Archaeoglobus\_fulgid  
14521127\_Pyrocooccus\_abyssi  
75401346\_Pseudomonas\_fluoresce  
102191610\_Rickettsia\_canade  
116670944\_Arthrobacter\_sp.  
15827608\_Mycobacterium\_leprae  
54023744\_Nocardia\_farcin  
19074910\_Encephalitozoon\_cunic  
51599084\_Borrelia\_garini  
42528163\_Treponema\_dentic  
46446128\_Proteochlamydia\_amoeba  
89898154\_Chlamydomonas\_felis  
118749311\_Marinomonas\_sp.  
68130224\_Leishmania\_major  
CM4722\_Cyanidioschyzon\_merolae  
118380025\_Tetrahymena\_thermo  
23619270\_Plasmodium\_falcip  
71076452\_Giardia\_lambl  
42523714\_Bdellovibrio\_bacter  
6319395\_Saccharomyces\_cerevi  
66816517\_Dictyostelium\_discoi  
24668543\_Drosophila\_melano  
94721239\_Homo\_sapien  
116061521\_Ostreococcus\_tauri  
30681405\_Arabidopsis\_thalia  
67481173\_Entamoeba\_histol

MMSRPYQVLSLTYHLHLYFKLRPPDIWILSKLQGLIRDAAGYSERCLRHE  
VMKHVGEALKKVRLTFRYLLLRVDQYTYKINELLETTREHYQKYNFSK  
ILIKILDGKIRNTLRFMLLSSLDKYLHRVFKLQESVTRHYDQYQFQHT  
ILKRVADSYRRIRNTARFMMIALDRWIVDRAALLQKELNTHAYEYFQK  
ILKRAADSYRRIRNTARFLLMISLDRWAVACALDAQNEIKDAYDNYQFHT  
ILKRAADSYRRIRNTARFLLMVVLDRAWAVGCAKAAQEDILKAYEAYDFHE  
ILARVVDAYRRIRNTLRFLLLEIDRYAIDRAAQLOAEILAHYEVYEFHP  
ILARVADSYRRIRNTARFMLLALDRWAVDRTLLQRELQELNTHAYEYFQK  
ILKQTTDYYRRLRNTLRFLLMPELERWVLRHLSIDVVKVGGCCDAFVSH  
LMQVAVENYKIRNTFRYILLQFPDQYILLRLAEVIGDVRDWDYDEMSFHK  
IVEQOTEVYRIRNTFRFLLLTIDRWALGRLOEIKRATEYDYSYEFK  
LLKKIADYRIRNTLRFILHFFDRWIISELQNLKLVHENYKFLFYR  
ILKRLSEAYRRIRNTCRFLLMDELDRFALHQLQEFVRRVROAYERFEFHR  
TIKQTSAYRKLRTIRFAMLPVFDKYVLRHNLATVKEIESYKAFDYSR  
ILKQTDADYRIRNTLRFLLPSLDRYILRRAAVLKDIEDYKNTFNFR  
ILSLSQSDYRKRNTARFLLPILDRWMLNRTADVDEISIAFERYEFK  
ILRQMSDIYRKLRTLRLLPIIDQHALLFQLENVVKNIQECYENYQFFK  
ILKQMDVYRIRNTARFLLPELDYRLLHRLREVIIEQDAFESQFFFR  
ILKQIADYRIRNTARFLLMPELDYRMLHRI TEVFAEVKDFGDFQYFR  
ILKQFLDIYRIRNTARFLLPELDYRMLHRI TEVFTVETDAFDYQFFR  
IVKQMSAYRRIRNTARFLLMELDKWALNKLEVLKRNVTESYDKYEFYN  
ILKQVAEVYRIRNTFRFLLREVDRYMLVKNLNDLITKVKEAYEYDFAA  
VLNAAARDIISKLRTLRFLLMYVIDQYMLHLLQDLANKITKEYQDFGK  
LLQQAENLCKIRGTMRYLKKSYLNRYLLSQLVEFSEVEKLYQAYEYNR  
ADEIRRQVLIPLWNSYAFFVVRPEIDRWILSNLQALLSSAKTEIAYNFAG  
EVKYVIGDLNINLVNVVVFADGLEEDKWILSELNIMISEFTNFVKNFEFHK  
SLDMTRDLNIIWNVYVFNALKLEDIWLRSRYRMLKEVIEAGMKEYVHE  
-LDLMRRDFNVIWNVYAFASLEVEDRWILSRLASLKRRLTAMEDLRIDH  
EVQNSSKFLNINLVNYYFATFREEDLWIESRINSLIKSVGEDIESLVFNR  
EARNIRMLNVVWNAVRFAHLKIEDRWILSRLESFIKEANEAMEGYQVHR  
-VEQVRNMLNINLVNYYVLFASFREEDKWILSRVNSLISEVENYIESFYLT  
VRDVVRRYHLLFWNCLQFYKDNVLDHYLLHELAALESIDIKMMWESLDFSK  
VFDTLRLFIKPIWNAHYHFFTENVLDIYILSKLIAVQKIEKSLDNFDTQA  
IRDGVRQVILPLWNVYSFFTADTLDQYLMANTGDLVRNMTAQLDGYDISG  
IREGMQRVLLPLWNAVYSLASHVLDYILAKLAVLRDLDLSQAEVCDISG  
IREGVSHALRPLWNAWTFLOTHVLDYILAKLAQTRDGMTEALEVYDIAG  
VKEVLKTLIIPWYNSLGFYLSLPMGDWITASFDNFAWSLTRKMRKYELSS  
VRDVLKNI IIPWNAYSFFTSNNLDKWI ISELESKLIKNEIDKYNLTK  
VRDVLKGLIPWNSYSFYINNPLDLWILSVTEKLVADVTEALDKYDLSQ  
VELVLRQILLPLWNAVYFFLELAIDQWIIISLNLKLVHEVEQGMDDYDLSR  
VESILKQILLPLTNVLSFFKYSEIDKWILSDLYTVVGVKVRSMNSYNLNT  
VQDMVRQVLLPWLNGFRFFSDNILDQWILSRLQTLTTKVNOEMQAYHLYN  
VKGVVKDILLPLFNAKFFITNEMDRWILASCQSLLRYVKAEMRLYHLYN  
VKDIVRDMVLPWYNAFRFFISNPMDRWILSLLASLISFLHKEMRAYRLYT  
VFAVKKIDIFLPWYNAKFLITNPTDRWIIISQNLINYVRIEMEKYHLYN  
VNEIVKSIILPYYSFRFFSDNIMQDWFSSQLSINSVHTMKAAYKLYN  
VKGVTKDLFVPWYNSFRFFTTSLVDMWILASFQLVATVRREMASYQLYN  
VYDIVRQILLRWNSYSFFAPNILDQWVLSRLNGLIANTHEMDAYRLYN  
VQDMVSKVLLPWWNSFKFLDDNVMDRWILASMSQSLVQFIEHEMGOYKLYT  
VQDMVKDVLFPWFNAYRFFVENVMDKWILASCQSLLIAFVRAEMAAAYRLYT  
VRDIIKDVLPWYNAFRFLASVIDVWILSFKESLLEFFATEMKEYRLYT  
VRDVLKDVLLPWYNAFRFLIPNITDRWILSFMQSLIGFFETEMAAAYRLYT  
VFGVLKDVLPWYNAFRFLVTVNVDIWTSSNTSLVKFVTEMAQYKLYT  
VLGVKDVLPWYNAFRFLVANILDQWHSATQSLVRFVREEMDAYRLYT  
LKELISTIFLPWFNTLRYLKMNMDRWILSLSMLVKKVREEMKMFRLYT

57157197\_Trichomonas\_vagina  
48477483\_Picrophilus\_torrid  
84029573\_Thermoplasma\_acidophi  
60681847\_Bacteroides\_fragil  
83815822\_Salinibacter\_ruber  
21673150\_Chlorobium\_tepidu  
11221641\_Frankia\_alni  
28210025\_Clostridium\_tetani  
47570085\_Bacillus\_cereus  
87311784\_Blastopirellula\_marin  
94985204\_Deinococcus\_geothe  
76261183\_Chloroflexus\_aurant

VAMIVRQTMPLPWMNSIKFWVENILDKWILSKINRLIQHVHREMGLYQLYN  
IGEITRKNLSTLLNVYSFFAENLLDRWMLSRNLNTTIKVKRENMDNYNIHT  
IDEVSRKTLMTVLNVYSFFAGNALDRYMSKVNVSFVRSRSDRDFHE  
IEEVRRKFFGTLYNTYSFFARPEIDRWILSVLNTLVKEVDTCYNEYEPTK  
LRDLRRTFFGTLENVYRFFARPELDQWIIISRLHTTTQAVEAALDEYDPTT  
IEEEQRKFFRAFINSYFFVRSSELDRWVLSLNTLIAEVTSRMEQYDLTG  
IEDIVRKLTLTYWNTASFFARHVLDLDRWALSELAAATVTEVDESLAGFDSL  
VEETQRKFLSTLWNVYSFYVENVMKDWIVSKLNSLIKDVEDHMSYRITQ  
VLEAKSKFVDTLNVYSFYVQTKLDEWVLSRLHSTTKKVRTALDDYQFTN  
IKDSIPEFLRLWNVYSFFTRSELDRWVLSLNLQAIATVVERMDAYDNYG  
VAEAQRNVNTLWNVYAFFVRPEMDRWLLARLEETVRDVTTSLDAYDARG  
VSESMRKFLLTLWNTYAFFVLQPIDRWALALNQLVQVTTTCFEEDVYVT

:

118193839\_Cenarchaeum\_symbio  
6325217\_Saccharomyces\_mt  
66800699\_Dictyostelium\_mt  
118751535\_Marinomonas\_sp.  
46129096\_Haemophilus\_influe  
75237181\_Escherichia\_coli  
47572014\_Rubrivivax\_gelati  
1174519\_Pseudomonas\_fluorescen  
83594296\_Rhodospirillum\_rubrum  
94968888\_Acidobacteria\_bacter  
15644113\_Thermotoga\_maritima  
15605834\_Aquifex\_aeolic  
116747573\_Syntrophobacter\_fuma  
116057018\_Ostreococcus\_tauri  
CM546\_Cyanidioschyzon\_merolae  
33239720\_Prochlorococcus\_marin  
22327660\_Arabidopsis\_cp  
56751678\_Synechococcus\_elonga  
113477079\_Trichodesmium\_erythr  
67921387\_Crocospaera\_watson  
34763705\_Fusobacterium\_nuclea  
47570310\_Bacillus\_cereus  
46852147\_Homo\_mt  
24665024\_Drosophila\_melano  
149179295\_Planctomyces\_maris  
18312756\_Pyrobaculum\_aeroph  
70606414\_Sulfolobus\_acidoc  
14600670\_Aeropyrum\_pernix  
84490249\_Methanosphaera\_stadt  
11498241\_Archaeoglobus\_fulgid  
14521127\_Pyrococcus\_abyssi  
75401346\_Pseudomonas\_fluoresce  
102191610\_Rickettsia\_canade  
116670944\_Arthrobacter\_sp.  
15827608\_Mycobacterium\_leprae  
54023744\_Nocardia\_farcin  
19074910\_Encephalitozoon\_cunic  
51599084\_Borrelia\_garini  
42528163\_Treponema\_dentic  
46446128\_Proteochlamydia\_amoeba  
89898154\_Chlamydomyces\_felis  
118749311\_Marinomonas\_sp.  
68130224\_Leishmania\_major  
CM4722\_Cyanidioschyzon\_merolae  
118380025\_Tetrahymena\_thermo  
23619270\_Plasmodium\_falcip  
71076452\_Giardia\_lambl  
42523714\_Bdellovibrio\_bacter  
6319395\_Saccharomyces\_cerevi  
66816517\_Dictyostelium\_discoi  
24668543\_Drosophila\_melano  
94721239\_Homo\_sapient  
116061521\_Ostreococcus\_tauri  
30681405\_Arabidopsis\_thalia  
67481173\_Entamoeba\_histol  
57157197\_Trichomonas\_vagina  
48477483\_Picrophilus\_torrid  
84029573\_Thermoplasma\_acidophi  
60681847\_Bacteroides\_fragil

YARSLESFINMLSQVYVPIVIRGELWYAVISEVLQALDVMLHPISPYTTTEY  
VLITLQYHNNELSAFYFDISKDILYQTTLVHILNAYRAILAPILPVMVQE  
VHTEIINFISIESSFYFDVIKRHLQYTVLFKMLDVINIALAPITVHTSED  
VNQKIQNFVVDLGGFYLDVIKDRQYQYALYHVEAFSRWIAPILSFTADE  
VVQRLMRFSVEMGSFYLDIIKDRQYQYALYHVEAFSRWIAPILSFTADE  
VVQRLMRFSVEMGSFYLDIIKDRQYQYALYHVEAFSRWIAPILSFTADE  
VVAKLQVYSEDLGAFYLDVLDKDRYQYALYHVEAFSRWIAPILSFTADE  
VYSKIHNFVVDLGGFYLDIIKDRQYQYALYHVEAFSRWIAPILSFTADE  
MFQELHGFVVDLSAFYLDIRKDALYRTVIDTVDFDCLVKWLPVFCFTAEE  
LFMRLKDFVVDLSAVYFDVIKDRYQYTAIWTIGEALVRLLPALMSFTAEE  
VYNLVVYKTTLESSLYLDVVDKDRYQYALYHVEAFSRWIAPILSFTADE  
VHNHINKFITTLISAIYLDVLDKDRYQYALYHVEAFSRWIAPILSFTADE  
VYHAFHNVVDLSAFYLDILKDRYQYAVYRILSALLRLMAPILSFTADE  
VVSAVTSFTTFLSNVYLDVSKDKLYQTVVLSALVERIIAIIAPLTPHMAEE  
IFQSVLRFVADLSNFYLDIAKDRYQYATMWAALMDMARALAPILPHTVED  
FFQLLQSFVVDLSNFYLDIAKDRYQYVLSLIVERLAGVISPVLSTHAE  
IFQIIQRFIVDLSNFYLDIAKDRYQYVLSLTHLLSILRVIAPIVPHLAE  
FFQTVQNFVVDLSNFYLDIGKDRYQYVLAICVEALATAIAPVLSHMAED  
FFQTIQNFVVDLSNFYLDIAKDRYQYVLAIVAVENLAKAIAPVLPHMAED  
FFQTVQNFVVDLSNFYLDIAKDRYQYVLAIVAVENLAKAIAPVLPHMAED  
LFQGIHYFAIDMSAFYLDIIKDRYQYVYVYVLMVTLTKMVAPILSFTADE  
VYHAIHNFITDLSNFYLDIAKDRYQYVLDVLDVLAIVAVENLAKAIAPVLP  
VVRLLRFTTRELDSNFYLDIIKDRYQYVLAIVAVENLAKAIAPVLPHMAED  
VVACVQNFANQVSAVYVHLIKDRYQYVLAIVAVENLAKAIAPVLPHMAED  
FLKNATAFIDDLSNWYIRNRNRFRWYQTLFVFLVTLKALAPSIPFLSER  
AAALWREFVETLSHRYIRLRRRVWYAVLHDLVKKVILGSLVLPVITEY  
LANKVTAFFIDDLSRFYLRVTRKRAWYVYVYVHLKGSLLLSVTPHMAED  
AARALRSFIEDVSHWYLRIRRRVWYATLYKVLWELLMAAPLIPYTAEE  
ATEKITDFLEDLSRWYVRLIRGRTWYTYLTYLKNLIMVLAIPSPHTEE  
VVRAFFDFVEDFSRWYIQIRPRVWYTMFRVIDRSLRAIAPFAPLIAEW  
ATRALRFTFIDDLSRWYVRLIRKRLWYTLKWFVLDVLRLLLPHTPYIAEE  
IYSRIEVFINVLTSTWYLRNLKARIWYEVVLYHVALSNFARLLAPFMPFLAE  
AYHQVSEFFEVLNWYIRRSRARFWYNTLYSCLETMAIAMSALVPMSEA  
ACDELSRYLDMLTNWYVRRSRQRFF-DALYTALETVSRVAASLLPVSE  
ACEQLRQFTEPLTNWYLRNRARFW-DTLHTVLEVTRARLAAPLLPLITEI  
ACEELRTFADALTNWYVRRSRRFW-DTLHTVLEVTRARLAAPLLPLISEV  
VLTALRFIDDLSNWYIRMYRKEI-HAVLGEILKFKSIVMGPTFPFSEY  
SIESLRFIDKLNNWYIRRSRRRFWYETLYYAIKTLMLLAPFIPFITEE  
AIPPMVEYIDLNNWYIRRSRRRFWYETLYRALKKFSLVAAPVVPFITES  
SVEPFVNFVDQLTNWYIRRSRRRFWYETLYYVLIETKISAPYVVPFISEA  
AVSPFVSFIDDLTNWYIRRCRRRFWFATLYEVLTVFCRVIAPFIPFISED  
VVPALFEFIEDLTNGYIRLNRARFWYHTLYSCLDTFSRLMAPFPFLAEH  
VVPGLIRFVGDLSNWYVRMNRMRKLSMMLYLLFSVSRIVGHIAFPVAEM  
VVPRLLLFIESLTNWYVRLNRRLKCLTGLDLSRLAVLMAFPAPFMAEW  
VVPRLIHFLNLTNWYIRLNRRLKLNVLNFVILNSTILMSPLVVPFITES  
VLPKLNRFIDDLTNWYIRLNRDRMLNVLNCRVLYLFTIIMAPFPFISEY  
VLPPELLRFIDDLTKWYIRFNRDTLKLNVLVYVLFMLCRLMAPYTPFVCDW  
VVPHLQFIEDLTNTYIRFNRSFLWYETLHEVLTLSRLMAPFAPFSEV  
VVPKLNRFIDDLTNWYIRFNRRRLKLNLFDAFTFVRAMAPFPFPLSES  
VVPKLNRFIDDLTNWYVRLNRRLKLNILYEVLMTICIAMGPTFPFITEY  
VVPRLTKFIDQLTNWYVRLNRRIKLDLYDLYTMVKMMAPFPYLTTEY  
VVPRLVKFVDILTNWYVRMNRRLKLETLFVLSLCLRLMAPYTPFTEL  
VVPKLSIFIDQLTNIYVRYNRGRLLKLNVLVHLLTLCKTMAPFPFPFVEN  
VVPRLKFLDNLNTNIYVRFNRRLKLSLTLFNLLTSCVMAPFPFPFTEY  
IITPLVDLLVTLNWNWYIRLNRKRFRCVLYHCLKIMSILMAPFPFPFSEF  
VLPKLNRFIDQLIN-----  
ALRYIEDLISELSNVYLRLSRKRFWYSTLYYTLRETIKMMAPITPFFSEY  
VVRASMEFVDDLNFYLRLSRKRFWYSTLYYALKAFSEVMAPITPFFSDF  
AGRLISDFNDLNSWYVRLNRKRFWYQTYLTCLETVAKLMAPIAPFYADR

|                                |                                                     |
|--------------------------------|-----------------------------------------------------|
| 83815822_Salinibacter_ruber    | AARAVEDFVEELSNWHLRRSRPRFWYQTIHECLAATAKLMSPIAPFFGEW  |
| 21673150_Chlorobium_tepidu     | ACRLIGDFVDDLNSWYIRRSRKRFWYQTLSTVLETLAKLMAFPVFPFAEK  |
| 111221641_Frankia_alni         | AGRRIARFIDDLNSWYVRRSRRRFW-TTLYTCLDALTRVMAPFTPFLTDW  |
| 28210025_Clostridium_tetani    | AALAIEDFVDELSNWYVRRNRSRFRWYVTLYKVLTTVSLIAAPFVFPITEE |
| 47570085_Bacillus_cereus       | AAREIAALVDEVSNWYVRRSRNRFWYETLHEVLVTISKLIAPFAPFVAED  |
| 87311784_Blastopirellula_marin | ACGALTNFVDALSNWYVRRSRDRFWYWTLYECLITTCCKLIAPFTPFLAEG |
| 94985204_Deinococcus_geothe    | GGRALERFVHDLNSWYVRRNRSRFRWYATLHEALLTVSOLTAPFTPFLAEA |
| 76261183_Chloroflexus_aurant   | AANAIEHFVDELSNWYVRRNRRRFRWYQTLYTCLVTVAKLAAPFIPFVSEE |

|                                 |            |
|---------------------------------|------------|
| 118193839_Cenarchaeum_symbio    | LYSILLEGW  |
| 6325217_Saccharomyces_mt        | VWNPMRGKW  |
| 66800699_Dictyostelium_mt       | VFSVFAHGW  |
| 118751535_Marinomonas_sp.       | IWSVPLETW  |
| 46129096_Haemophilus_influe     | IWFVFTTEF  |
| 75237181_Escherichia_coli       | VWYVFTGEW  |
| 47572014_Rubrivivax_gelati      | AWSIFTQTY  |
| 1174519_Pseudomonas_fluorescen  | LWSVMLNTW  |
| 83594296_Rhodospirillum_rubrum  | AWSVHFQSF  |
| 94968888_Acidobacteria_bacter   | LWTVHAAFY  |
| 15644113_Thermotoga_maritima    | VYTVQAEYF  |
| 15605834_Aquifex_aeolic         | LWSVFLYEM  |
| 116747573_Syntrophobacter_fuma  | AWTVHLEEF  |
| 116057018_Ostreococcus_tauri    | AFSVFIAGW  |
| CM546_Cyanidioschyzon_merolae   | LWSIFQNGW  |
| 33239720_Prochlorococcus_marin  | IWSVFQRYW  |
| 22327660_Arabidopsis_cp         | VWVVFELKW  |
| 56751678_Synechococcus_elonga   | IWSVFAQGW  |
| 113477079_Trichodesmium_erythr  | IWSVFESGW  |
| 67921387_Crocospaera_watson     | IWSVFEEAGW |
| 34763705_Fusobacterium_nuclea   | IWSIFLADW  |
| 47570310_Bacillus_cereus        | VWSVQLTDM  |
| 46852147_Homo_mt                | VFSVFRITGW |
| 24665024_Drosophila_melano      | SWGAFHEQI  |
| 149179295_Planctomyces_maris    | MYSVHLCDF  |
| 18312756_Pyrobaculum_aeroph     | LWSVHLAQY  |
| 70606414_Sulfolobus_acidoc      | IYSISMEKI  |
| 14600670_Aeropyrum_pernix       | LYSIHMLDM  |
| 84490249_Methanosphaera_stadtm  | IYSVHMLDW  |
| 11498241_Archaeoglobus_fulgid   | FYSIFMEEY  |
| 14521127_Pyrococcus_abyssi      | IYSVHMLDW  |
| 75401346_Pseudomonas_fluoresce  | VYSVHLQDW  |
| 102191610_Rickettsia_canade     | IYSVHLCNY  |
| 116670944_Arthrobacter_sp.      | IWSVHLADW  |
| 15827608_Mycobacterium_leprae   | IWSVHLTDW  |
| 54023744_Nocardia_farcin        | IWSVHLADW  |
| 19074910_Encephalitozoon_cunic  | SYSVHFQEY  |
| 51599084_Borrelia_garini        | IYSIHLNDY  |
| 42528163_Treponema_dentic       | IWSIHLADY  |
| 46446128_Proteochlamydia_amoeba | IYSVHLCDF  |
| 89898154_Chlamydomydia_felis    | IYSVHLCDF  |
| 118749311_Marinomonas_sp.       | LYSVHLCDY  |
| 68130224_Leishmania_major       | LYSVHYLMI  |
| CM4722_Cyanidioschyzon_merolae  | TYSVHFPLP  |
| 118380025_Tetrahymena_thermo    | FYSIHFLRI  |
| 23619270 Plasmodium_falcip      | IYSVHFIML  |
| 71076452_Giardia_lambli         | MYSIHFVAV  |
| 42523714_Bdellovibrio_bacter    | TYSVHLESF  |
| 6319395_Saccharomyces_cerevi    | IYSVHFLSY  |
| 66816517_Dictyostelium_discoi   | MYSVHYVMF  |
| 24668543_Drosophila_melano      | IFSVHYQMM  |
| 94721239_Homo_sapien            | MYSIHYLML  |
| 116061521_Ostreococcus_tauri    | IYSIHCFEF  |
| 30681405_Arabidopsis_thalia     | LYSVHYCSI  |
| 67481173_Entamoeba_histol       | CYSVHFVQI  |
| 57157197_Trichomonas_vagina     | -----      |
| 48477483_Picrophilus_torrid     | LYSVHMESY  |
| 84029573_Thermoplasma_acidophi  | IYSVHLEAF  |
| 60681847_Bacteroides_fragil     | LYSVHLAKF  |
| 83815822_Salinibacter_ruber     | LYSVHLASF  |
| 21673150_Chlorobium_tepidu      | IWSVHLADW  |
| 111221641_Frankia_alni          | LWSVHLAAW  |
| 28210025_Clostridium_tetani     | IYSIHLCNW  |

|                                |           |
|--------------------------------|-----------|
| 47570085_Bacillus_cereus       | IHSVHLEDY |
| 87311784_Blastopirellula_marin | LWSVHLCDF |
| 94985204_Deinococcus_geothe    | LYSVHLTRW |
| 76261183_Chloroflexus_aurant   | IYSVHLAQW |

**Note:** There are two eukaryotic sequence clades for this gene, each of which clusters within bacterial homologs with strong support. The minor eukaryotic sequence clade (lower part of the tree) contains chloroplast precursors from plants and mitochondrial precursors from opisthokonts. Sequences in the major eukaryotic sequence clade are cytosolic. It is likely that the major eukaryotic sequence clade resulted from an ancient HGT event prior to the split of most eukaryotic super groups. An alternative explanation is that the common ancestor of cellular organisms contained two copies of this gene, which were differentially retained among lineages.

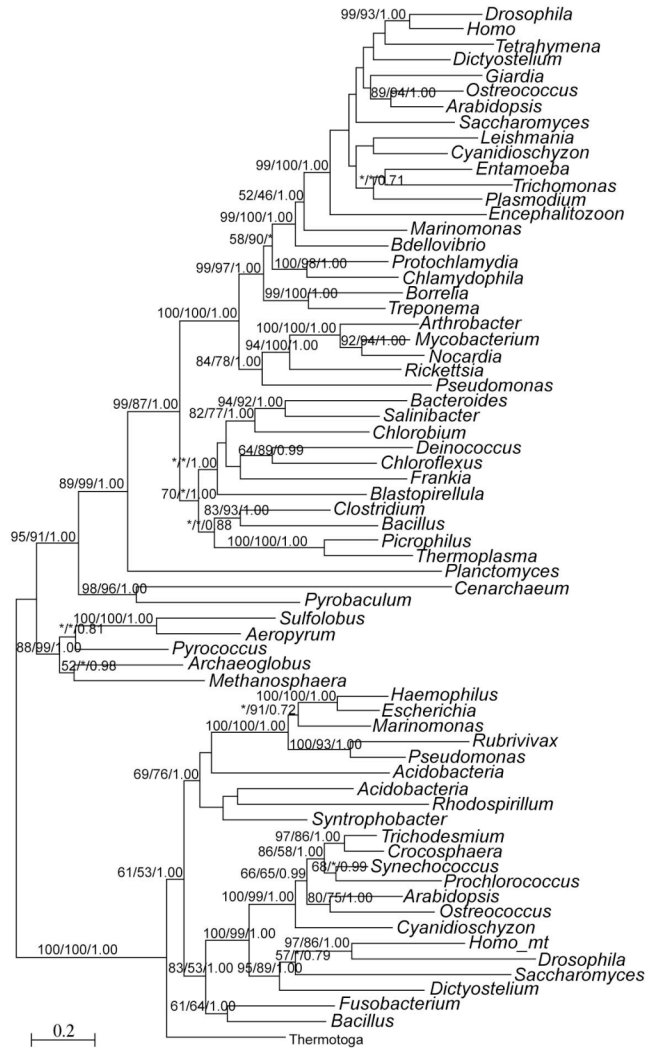

**Figure 22.** Molecular phylogeny of isoleucyl-tRNA synthetase. P-value = 0.235 from AU test for the presented tree. AU test was also performed on an alternative topology enforcing a sequence monophyly of archaea and the major eukaryotic group. Such an alternative topology is based on the common belief that archaea and eukaryotes are more closely related than each is to bacteria. P-value < 0.001 from AU test for the alternative topology.

---

---

**23. IspD (D)**

**See** Huang and Gogarten 2007. Did an ancient chlamydial endosymbiosis facilitate the establishment of primary plastids? *Genome Biology* 8:R99.

---

---

**24. Polynucleotide phosphorylase (D)**

**See** Huang and Gogarten 2007. Did an ancient chlamydial endosymbiosis facilitate the establishment of primary plastids? *Genome Biology* 8:R99.

---

---

**25. ATP/ADP translocase (N)**

**See** Huang and Gogarten 2007. Did an ancient chlamydial endosymbiosis facilitate the establishment of primary plastids? *Genome Biology* 8:R99.

---

---

**26. Glycerol-3-phosphate acyltransferase (N)**

**See** Huang and Gogarten 2007. Did an ancient chlamydial endosymbiosis facilitate the establishment of primary plastids? *Genome Biology* 8:R99.

---

---

**27. Sodium:hydrogen antiporter (N)**

**See** Huang and Gogarten 2007. Did an ancient chlamydial endosymbiosis facilitate the establishment of primary plastids? *Genome Biology* 8:R99.

---

---

**28. GcpE (D)**

**See** Huang and Gogarten 2007. Did an ancient chlamydial endosymbiosis facilitate the establishment of primary plastids? *Genome Biology* 8:R99.

---

---

**29. Beta-ketoacyl-ACP synthase (fabF) (D)**

**See** Huang and Gogarten 2007. Did an ancient chlamydial endosymbiosis facilitate the establishment of primary plastids? *Genome Biology* 8:R99.

---

---

**30. Aspartate aminotransferase (D)**

**See** Huang and Gogarten 2007. Did an ancient chlamydial endosymbiosis facilitate the establishment of primary plastids? *Genome Biology* 8:R99.

---

---

**31. tyrosyl-tRNA synthetase (D)**

**See** Huang and Gogarten 2007. Did an ancient chlamydial endosymbiosis facilitate the establishment of primary plastids? *Genome Biology* 8:R99.

---

---

**32. Cu-ATPase (D)**

**See** Huang and Gogarten 2007. Did an ancient chlamydial endosymbiosis facilitate the establishment of primary plastids? *Genome Biology* 8:R99.

---

---

**33. IspE (D)**

**See** Huang and Gogarten 2007. Did an ancient chlamydial endosymbiosis facilitate the establishment of primary plastids? *Genome Biology* 8:R99.

---

---

**34. Enoyl-ACP reductase (fabI) (D)**

**See** Huang and Gogarten 2007. Did an ancient chlamydial endosymbiosis facilitate the establishment of primary plastids? *Genome Biology* 8:R99.

---

---

**35. Florfenicol resistance protein (E)**

**See** Huang and Gogarten 2006. Ancient horizontal gene transfer can benefit phylogenetic reconstruction. *Trends in Genetics* 22:361-366.

---

---

**36. 23S rRNA (Uracil-5-)-methyltransferase (D)**

**See** Huang and Gogarten 2007. Did an ancient chlamydial endosymbiosis facilitate the establishment of primary plastids? *Genome Biology* 8:R99.

---

---

**37. Topoisomerase 6 subunit B (TOP6B) (N)**

**See** Huang and Gogarten 2006. Ancient horizontal gene transfer can benefit phylogenetic reconstruction. *Trends in Genetics* 22:361-366.
